# Supplementary material
Source: PubMed Central journal article supplement (PMC4215808)
Supplement: NIHMS431610-supplement-1_si_001.pdf [file NIHMS431610-supplement-1_si_001.pdf]

# ***Nickel-Catalyzed Cross Couplings of Benzylic Ammonium Salts and Boronic Acids: Stereospecific Formation of Diarylethanes via C–N Bond Activation***

Prantik Maity, Danielle M. Shacklady-McAtee, Glenn P. A. Yap, Eric R. Sirianni, Mary P. Watson\*

Department of Chemistry and Biochemistry, University of Delaware, Newark, DE 19716

[mpwatson@udel.edu](mailto:mpwatson@udel.edu)

## Supporting Information

|                                                                                                                                                   |      |
|---------------------------------------------------------------------------------------------------------------------------------------------------|------|
| General Information.....                                                                                                                          | S2   |
| Cross-Coupling of Benzyl Ammonium Triflates to Give Diaryl Methanes .....                                                                         | S3   |
| Stereospecific Cross Coupling of Benzyl Ammonium Triflates to Give Diarylethanes.....                                                             | S17  |
| Preparation of Benzyl Ammonium Triflates.....                                                                                                     | S27  |
| Cross Coupling of Aryl Bromide in Presence of Benzylic Dimethylamino Group: Preparation of 1-(Biphenyl-4-yl)- <i>N,N</i> -dimethylethanamine..... | S33  |
| Preparation and Activity of Alkylnickel(II) Triflate <b>48</b> .....                                                                              | S34  |
| <sup>1</sup> H and <sup>13</sup> C NMR Spectra .....                                                                                              | S37  |
| HPLC Data for Racemic and Enantioenriched Products.....                                                                                           | S184 |
| Crystal Structure Report for <b>48</b> & ( <i>R</i> )- <b>38</b> .....                                                                            | S200 |

## General Information

Reactions were performed either in a N<sub>2</sub>-atmosphere glovebox in oven-dried 1-dram vials with Teflon-lined caps or in oven-dried round-bottomed flasks unless otherwise noted. Flasks were fitted with rubber septa, and reactions were conducted under a positive pressure of N<sub>2</sub>. Stainless steel syringes or cannulae were used to transfer air- and moisture-sensitive liquids. Flash chromatography was performed on silica gel 60 (40-63 μm, 60Å) unless otherwise noted. Select compounds were purified by flash chromatography on silica gel (5-20 μm) as needed. Thin layer chromatography (TLC) was performed on glass plates coated with silica gel 60 with F254 indicator. Commercial reagents were purchased from Sigma Aldrich, Acros, Fisher, Strem, TCI, Combi Blocks, Alfa Aesar, or Cambridge Isotopes Laboratories and used as received with the following exceptions: toluene, CH<sub>2</sub>Cl<sub>2</sub>, dioxane, and Et<sub>2</sub>O were dried by passing through drying columns.<sup>1</sup> Toluene was then degassed by sparging with N<sub>2</sub> and stored over activated 4Å MS in a N<sub>2</sub>-atmosphere glovebox. Anhydrous K<sub>3</sub>PO<sub>4</sub> was purchased from Acros and used as received. MeOTf was purchased from TCI, America, and used as received. CDCl<sub>3</sub> was stored over oven-dried potassium carbonate. Proton nuclear magnetic resonance (<sup>1</sup>H NMR) spectra and carbon nuclear magnetic resonance (<sup>13</sup>C NMR) spectra were recorded on both 400 MHz and 600 MHz spectrometers. Chemical shifts for protons are reported in parts per million downfield from tetramethylsilane and are referenced to residual protium in the NMR solvent (CHCl<sub>3</sub> = δ 7.28; (CD<sub>3</sub>)<sub>2</sub>CO = δ 2.07 ). Chemical shifts for carbon are reported in parts per million downfield from tetramethylsilane and are referenced to the carbon resonances of the solvent (CDCl<sub>3</sub> = δ 77.07; (CD<sub>3</sub>)<sub>2</sub>CO = δ 28.94) Data are represented as follows: chemical shift, multiplicity (br = broad, s = singlet, d = doublet, t = triplet, q = quartet, p = pentet, m = multiplet, dd = doublet of doublets, h = heptet), coupling constants in Hertz (Hz), integration. Infrared (IR) spectra were obtained using FTIR spectrophotometers with material loaded onto a NaCl plate. The mass spectral data were obtained at the University of Illinois, Urbana–Champagne, mass spectrometry facility and the University of Delaware mass spectrometry facility. Optical rotations were measured using a 2.5 mL cell with a 1 dm path length. Melting points were taken on a Stuart SMP10 instrument.

---

<sup>1</sup> Pangborn, A. B.; Giardello, M. A.; Grubbs, R. H.; Rosen, R. K.; Timmers, F. J. *Organometallics* **1996**, *15*, 1518.

Dimethyl benzyl amines were prepared either from the benzyl amines using Eschweiler–Clarke conditions<sup>2</sup> or via reductive amination of the benzaldehyde or acetophenone derivative.<sup>3</sup> It has been reported that epimerization does not occur under the Eschweiler–Clarke conditions.<sup>4</sup> Precursors for racemic ammonium triflates were synthesized via reductive amination of the corresponding acetophenone derivatives.

## Cross-Coupling of Benzyl Ammonium Triflates to Give Diaryl Methanes

### General Procedure A: CsF as Base

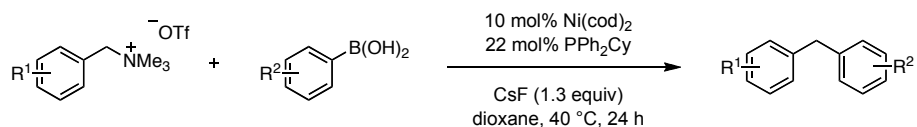

In a N<sub>2</sub>-atmosphere glovebox, Ni(cod)<sub>2</sub> (10 mol %), PPh<sub>2</sub>Cy (22 mol %), and CsF (1.3 equiv) were weighed into a 1-dram vial. Ammonium triflate (1.0 equiv) and boronic acid (1.2 equiv) were added, followed by dioxane (0.33 M). The vial was capped with a Teflon-lined cap and removed from the glovebox. The mixture was stirred for 24 h at 40 °C. The reaction mixture was then diluted with Et<sub>2</sub>O (1.5 mL) and filtered through a plug of silica gel, which was rinsed with Et<sub>2</sub>O (10 mL). The filtrate was concentrated and then purified by silica gel chromatography to give the diarylmethane product.

### General Procedure B: K<sub>3</sub>PO<sub>4</sub> as Base

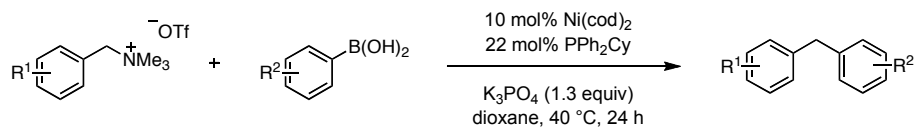

<sup>2</sup> Icke, R. N.; Wisegarver, B. B.; Alles, G. A. *Org. Synth.* **1955**, *Coll. Vol. 3*, 723.

<sup>3</sup> The reductive aminations were carried out according to literature procedure, except that Me<sub>2</sub>NH was formed in situ from Me<sub>2</sub>N·HCl and Et<sub>3</sub>N. See: Bhattacharyya, S. *Synth. Commun.* **2000**, *30*, 2001.

<sup>4</sup> Sunman, C. J.; Farkas, E. *J. Org. Chem.* **1985**, *50*, 1110.

General Procedure B is the same as General Procedure A, except that  $\text{K}_3\text{PO}_4$  replaces CsF as base. In a  $\text{N}_2$ -atmosphere glovebox,  $\text{Ni}(\text{cod})_2$  (10 mol %),  $\text{PPh}_2\text{Cy}$  (22 mol %), and  $\text{K}_3\text{PO}_4$  (1.3 equiv) were weighed into a 1-dram vial. Ammonium triflate (1.0 equiv) and boronic acid (1.2 equiv) were added, followed by dioxane (0.33 M). The vial was capped with a Teflon-lined cap and removed from the glovebox. The mixture was stirred for 24 h at 40 °C. The reaction mixture was diluted with  $\text{Et}_2\text{O}$  (1.5 mL) and filtered through a plug of silica gel, which was rinsed with  $\text{Et}_2\text{O}$  (10 mL). The filtrate was concentrated and then purified by silica gel chromatography to give the diarylmethane product.

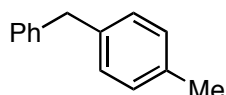

**1-Benzyl-4-methylbenzene (2).** Prepared via General Procedure A (CsF as base) on a 0.30 mmol scale. The crude material was purified by silica gel chromatography (100% hexanes with 0.5%  $\text{Et}_3\text{N}$ ) to give compound **2** (run 1: 43.0 mg, 79%; run 2: 41.0 mg, 81%) as a colorless oil.

Diarylmethane **2** was also prepared via General Procedure B ( $\text{K}_3\text{PO}_4$  as base) on a 0.30 mmol scale. The crude material was purified as described above to give compound **2** (run 1: 45.0 mg, 84%; run 2: 46.0 mg, 84%) as a colorless oil:  $^1\text{H}$  NMR (400 MHz,  $\text{CDCl}_3$ )  $\delta$  7.42 – 7.32 (m, 2H), 7.32 – 7.22 (m, 3H), 7.22 – 7.12 (m, 4H), 4.03 (s, 2H), 2.40 (s, 3H);  $^{13}\text{C}$  NMR (101 MHz,  $\text{CDCl}_3$ )  $\delta$  141.5, 138.1, 135.6, 129.2, 128.9, 128.9, 128.5, 126.1, 41.6, 21.1. The spectral data for this compound matches that reported in the literature.<sup>5</sup>

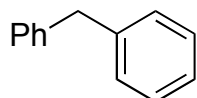

**Diphenylmethane (3).** Prepared via General Procedure A (CsF as base) on a 0.30 mmol scale. The crude material was purified by silica gel chromatography (100% hexanes with 0.5%  $\text{Et}_3\text{N}$ ) to give compound **3** (run 1: 35.0 mg, 70%; run 2: 41.0 mg, 81%) as a colorless oil:  $^1\text{H}$  NMR (400 MHz,  $\text{CDCl}_3$ )  $\delta$  7.36 – 7.30 (m, 4H), 7.27 – 7.20 (m, 6H), 4.03 (s, 2H);  $^{13}\text{C}$  NMR (101 MHz,  $\text{CDCl}_3$ )  $\delta$  141.1, 129.0, 128.5, 126.1, 42.0. The spectral data for this compound matches that reported in the literature.<sup>6</sup>

<sup>5</sup> Schmink, J. R.; Leadbeater, N. E. *Org. Lett.* **2009**, *11*, 2575.

<sup>6</sup> Kuwano, R.; Yokogi, M. *Org. Lett.* **2005**, *7*, 945.



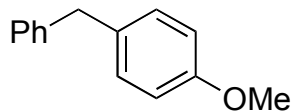

**1-Benzyl-4-methoxybenzene (4).** Prepared via General Procedure A (CsF as base) on a 0.30 mmol scale. The crude material was purified by silica gel chromatography (100% hexanes with 0.5% Et<sub>3</sub>N) to give compound **4** (50.0 mg, 85%) as a colorless oil.

Diarylmethane **4** was also prepared via General Procedure B (K<sub>3</sub>PO<sub>4</sub> as base) on a 0.30 mmol scale. The crude material was purified as described above to give compound **4** (run 1: 44.0 mg, 75%; run 2: 33.0 mg, 56%) as a colorless oil: <sup>1</sup>H NMR (400 MHz, CDCl<sub>3</sub>) δ 7.36 – 7.30 (m, 2H), 7.27 – 7.21 (m, 3H), 7.18 – 7.11 (m, 2H), 6.92 – 6.84 (m, 2H), 3.98 (s, 2H), 3.83 (s, 3H); <sup>13</sup>C NMR (101 MHz, CDCl<sub>3</sub>) δ 158.0, 141.6, 133.3, 129.9, 128.8, 128.5, 126.0, 113.9, 55.3, 41.1. The spectral data for this compound matches that reported in the literature.<sup>7</sup>

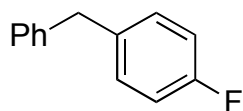

**1-Benzyl-4-fluorobenzene (5).** Prepared via General Procedure A (CsF as base) on a 0.30 mmol scale. The crude material was purified by silica gel chromatography (100% hexanes with 0.5% Et<sub>3</sub>N) to give compound **5** (run 1: 40.0 mg, 71%; run 2: 36.0 mg, 65%; run 3: 44.0 mg, 78%) as a colorless oil: <sup>1</sup>H NMR (400 MHz, CDCl<sub>3</sub>) δ 7.40 – 7.30 (m, 2H), 7.30 – 7.13 (m, 5H), 7.07 – 6.95 (m, 2H), 4.00 (s, 2H); <sup>13</sup>C NMR (101 MHz, CDCl<sub>3</sub>) δ 161.4 (d, *J*<sub>C-F</sub> = 245.4 Hz), 141.0, 136.8 (q, *J*<sub>C-F</sub> = 3.0 Hz), 130.3 (q, *J*<sub>C-F</sub> = 8.1 Hz), 128.9, 128.6, 126.3, 115.3 (q, *J*<sub>C-F</sub> = 21.2 Hz), 41.1). The spectral data for this compound matches that reported in the literature.<sup>8</sup>

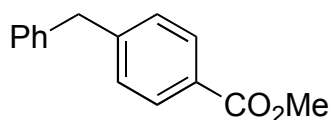

**1-Methyl 4-benzylbenzoate (6).** Prepared via General Procedure A (CsF as base) on a 0.30 mmol scale. The crude material was purified by silica gel chromatography (5% acetone/hexanes with 0.5% Et<sub>3</sub>N) to give compound **6** (48.0 mg, 71%) as a colorless oil.

Diarylmethane **6** was also prepared via General Procedure B (K<sub>3</sub>PO<sub>4</sub> as base) on a 0.30 mmol scale. The crude material was purified as described above to give compound **6** (15.0 mg, 22%) as a colorless oil: <sup>1</sup>H NMR (400 MHz, CDCl<sub>3</sub>) δ 8.04 – 7.96 (m, 2H), 7.39 – 7.17 (m, 7H),

<sup>7</sup> Henry, N.; Enguehard-Gueiffier, C.; They, I.; Gueiffier, A. *Eur. J. Org. Chem.* **2008**, 28, 4824.

<sup>8</sup> Chen, C. R; Biradar, D. B; Gau, H. M; Zhou, S. *Adv. Synth. Cat.* **2010**, 352, 1718.

4.07 (s, 2H), 3.93 (s, 3H);  $^{13}\text{C}$  NMR (101 MHz,  $\text{CDCl}_3$ )  $\delta$  167.1, 146.6, 140.2, 129.9, 129.0, 128.6, 128.1, 126.4, 52.1, 41.9;  $^{13}\text{C}$  NMR (101 MHz,  $(\text{CD}_3)_2\text{CO}$ )  $\delta$  166.2, 147.1, 140.6, 129.5, 129.0, 128.9, 128.5, 128.1, 126.2, 51.4, 41.4.<sup>9</sup> The spectral data for this compound matches that reported in the literature.<sup>10</sup>

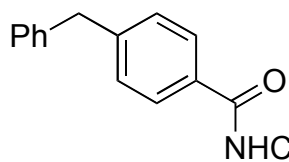

**4-Benzyl-N-cyclopentylbenzamide (7).** Prepared via General Procedure A (CsF as base) on a 0.30 mmol scale. The crude material was purified by silica gel chromatography (10:15:75 acetone/dichloromethane/hexanes with 0.5%  $\text{Et}_3\text{N}$ ) to give compound **7** (run 1: 39.4 mg, 47%; run 2: 42.8 mg, 51%) as a white solid.

Diarylmethane **7** was also prepared via General Procedure B ( $\text{K}_3\text{PO}_4$  as base) on a 0.30 mmol scale. The crude material was purified as described above to give compound **7** (57 mg, 67%) as a white solid (mp 145–149 °C):  $^1\text{H}$  NMR (400 MHz,  $\text{CDCl}_3$ )  $\delta$  7.72 – 7.66 (m, 2H), 7.35 – 7.27 (m, 2H), 7.27 – 7.20 (m, 3H), 7.20 – 7.15 (m, 2H), 6.25 – 6.08 (m, 1H), 4.40 (h,  $J = 7.0$  Hz, 1H), 4.03 (s, 2H), 2.17 – 2.02 (m, 2H), 1.82 – 1.57 (m, 4H), 1.49 (ddt,  $J = 12.9, 6.3, 1.8$  Hz, 2H);  $^{13}\text{C}$  NMR (101 MHz,  $\text{CDCl}_3$ )  $\delta$  167.1, 144.6, 140.4, 132.8, 129.1, 128.9, 128.6, 127.1, 126.3, 51.65, 41.7, 33.2, 23.8; FTIR (NaCl/thin film) 3446, 2959, 2867, 2360, 2339, 1635, 1540  $\text{cm}^{-1}$ ; HRMS (EI+)  $[\text{M}]^+$  calculated for  $\text{C}_{19}\text{H}_{21}\text{ON}$ : 279.1623, found: 279.1631.

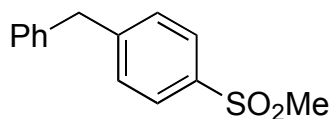

**1-Benzyl-4-(methylsulfonyl)benzene (8).** Prepared via General Procedure A (CsF as base) on a 0.30 mmol scale. The crude material was purified by silica gel chromatography (10:20:70 acetone/dichloromethane/hexanes with 0.5%  $\text{Et}_3\text{N}$ ) to give compound **8** (run 1: 53.0 mg, 72%; run 2: 59.0 mg, 79%) as a white crystalline solid.

Diarylmethane **8** was also prepared via General Procedure B ( $\text{K}_3\text{PO}_4$  as base) on a 0.30 mmol scale. The crude material was purified as described above to give compound **8** (run 1 74.0 mg, quantitative; run 2: 73.9 mg, quantitative) as a white crystalline solid (mp

<sup>9</sup> Although two  $^{13}\text{C}$  NMR peaks are coincident when  $\text{CDCl}_3$  is used as solvent, all eleven  $^{13}\text{C}$  NMR peaks are seen when  $(\text{CD}_3)_2\text{CO}$  is used as solvent.

<sup>10</sup> Srimani, D.; Bej, A.; Sarkar, A. *J. Org. Chem.* **2010**, *75*, 4296.

67–72 °C):  $^1\text{H}$  NMR (400 MHz,  $\text{CDCl}_3$ )  $\delta$  7.92 – 7.83 (m, 2H), 7.46 – 7.38 (m, 2H), 7.38 – 7.30 (m, 2H), 7.30 – 7.23 (m, 1H), 7.23 – 7.18 (m, 2H), 4.09 (s, 2H), 3.05 (s, 3H);  $^{13}\text{C}$  NMR (101 MHz,  $\text{CDCl}_3$ )  $\delta$  147.8, 139.5, 138.3, 129.8, 129.0, 128.8, 127.6, 126.7, 44.6, 41.8; FTIR (NaCl/thin film) 3442, 3027, 2926, 1647, 1596, 1303, 1148, 1090, 957  $\text{cm}^{-1}$ ; HRMS (EI+)  $[\text{M}]^+$  calculated for  $\text{C}_{14}\text{H}_{14}\text{O}_2\text{S}$ : 246.0715, found: 246.0717.

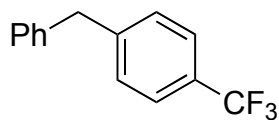

**1-Benzyl-4-(trifluoromethyl)benzene (9).** Prepared via General Procedure A (CsF as base) on a 0.30 mmol scale. The crude material was purified by silica gel chromatography (100% hexanes with 0.5%  $\text{Et}_3\text{N}$ ) to give compound **9** (59.0 mg, 83%) as a colorless oil. Diarylmethane **9** was also prepared via General Procedure A (CsF as base) on a 0.40 mmol scale. The crude material was purified as described above to give compound **9** (89.0 mg, 94%) as a colorless oil.

Diarylmethane **9** was also prepared via General Procedure B ( $\text{K}_3\text{PO}_4$  as base) on a 0.30 mmol scale. The crude material was purified as described above to give compound **9** (run 1: 59.0 mg, 83%; run 2: 52.0 mg, 73%) as a colorless oil:  $^1\text{H}$  NMR (400 MHz,  $\text{CDCl}_3$ )  $\delta$  7.58 (d,  $J = 8.1$  Hz, 2H), 7.39 – 7.31 (m, 4H), 7.31 – 7.25 (m, 1H), 7.25 – 7.20 (m, 2H), 4.08 (s, 2H);  $^{13}\text{C}$  NMR (101 MHz,  $\text{CDCl}_3$ )  $\delta$  145.2 (q,  $J_{\text{C-F}} = 1.0$  Hz), 140.0, 129.2, 129.0, 128.7, 128.5 (q,  $J_{\text{C-F}} = 32.3$  Hz), 126.5, 125.4 (q,  $J_{\text{C-F}} = 4.0$  Hz), 124.3 (q,  $J_{\text{C-F}} = 272.7$  Hz), 41.7. The spectral data for this compound matches that reported in the literature.<sup>11</sup>

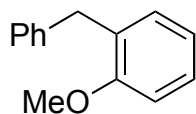

**1-Benzyl-2-methoxybenzene (10).** Prepared via General Procedure B ( $\text{K}_3\text{PO}_4$  as base) on a 0.30 mmol scale. The crude material was purified by silica gel chromatography (100% hexanes with 0.5%  $\text{Et}_3\text{N}$ ) to give compound **10** (49 mg, 83%) as a colorless oil:  $^1\text{H}$  NMR (400 MHz,  $\text{CDCl}_3$ )  $\delta$  7.41 – 7.20 (m, 6H), 7.15 (dd,  $J = 7.4, 1.7$  Hz, 1H), 7.02 – 6.88 (m, 2H), 4.06 (s, 2H), 3.88 (s, 3H);  $^{13}\text{C}$  NMR (101 MHz,  $\text{CDCl}_3$ )  $\delta$  157.4, 141.1, 130.4, 129.7, 129.0, 128.3, 127.5, 125.8, 120.5, 110.4, 55.4, 35.9. The spectral data for this compound matches that reported in the literature.<sup>7</sup>

<sup>11</sup> Bedford, R. B.; Huwe, M.; Wilkinson, M. C. *Chem. Comm.* **2009**, 5. 600.

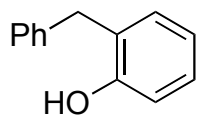

**2-Benzylphenol (11).** Prepared via General Procedure A (CsF as base) on a 0.30 mmol scale. The crude material was purified by silica gel chromatography (15–100% dichloromethane/hexanes with 0.5% Et<sub>3</sub>N) to give compound **10** (30.0 mg, 65%) as a colorless oil: <sup>1</sup>H NMR (400 MHz, CDCl<sub>3</sub>) δ 7.39 – 7.22 (m, 5H), 7.21 – 7.13 (m, 2H), 6.94 (td, *J* = 7.5, 1.2 Hz, 1H), 6.85 – 6.78 (m, 1H), 4.83 (s, 1H), 4.05 (s, 2H); <sup>13</sup>C NMR (101 MHz, CDCl<sub>3</sub>) δ 153.7, 139.9, 131.0, 128.7, 128.7, 127.9, 127.0, 126.4, 121.0, 115.7, 36.4. The spectral data for this compound matches that reported in the literature.<sup>1</sup>

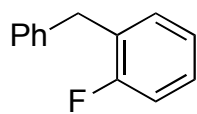

**1-Benzyl-2-fluorobenzene (12).** Prepared via General Procedure A (CsF as base) on a 0.30 mmol scale. The crude material was purified by silica gel chromatography (100% hexanes with 0.5% Et<sub>3</sub>N) to give compound **12** (51.0 mg, 91%) as a colorless oil.

Diarylmethane **12** was also prepared via General Procedure B (K<sub>3</sub>PO<sub>4</sub> as base) on a 0.30 mmol scale. The crude material was purified as described above to give compound **12** (run 1: 54.0 mg, 98%; run 2: 51.2 mg, 91%) as a colorless oil: <sup>1</sup>H NMR (400 MHz, CDCl<sub>3</sub>) δ 7.40 – 7.31 (m, 2H), 7.31 – 7.16 (m, 5H), 7.15 – 7.04 (m, 2H), 4.07 (s, 2H); <sup>13</sup>C NMR (101 MHz, CDCl<sub>3</sub>) δ 161.0 (d, *J*<sub>C-F</sub> = 245.4 Hz), 139.9, 131.1 (d, *J*<sub>C-F</sub> = 4.0 Hz), 128.8, 128.6, 128.2, 128.0 (d, *J*<sub>C-F</sub> = 8.1 Hz), 126.3, 124.1 (d, *J*<sub>C-F</sub> = 4.0 Hz), 115.4 (d, *J*<sub>C-F</sub> = 22.2 Hz), 34.9 (d, *J*<sub>C-F</sub> = 3.0 Hz); <sup>13</sup>C NMR (101 MHz, (CD<sub>3</sub>)<sub>2</sub>CO) δ 160.9 (d, *J*<sub>C-F</sub> = 245.4 Hz), 140.1, 131.3 (d, *J*<sub>C-F</sub> = 4.0 Hz), 128.6 (d, *J*<sub>C-F</sub> = 1.0 Hz), 128.4, 128.20 (d, *J*<sub>C-F</sub> = 8.1 Hz), 128.19 (d, *J*<sub>C-F</sub> = 15.2 Hz), 126.1, 124.3 (d, *J*<sub>C-F</sub> = 2.0 Hz), 115.2 (d, *J*<sub>C-F</sub> = 22.2 Hz), 34.4 (d, *J*<sub>C-F</sub> = 3.0 Hz); <sup>19</sup>F NMR (376 MHz, CDCl<sub>3</sub>) δ -117.8; LRMS (EI+) [M]<sup>+</sup> calculated for C<sub>13</sub>H<sub>11</sub>F: 186.1, found: 186.1.

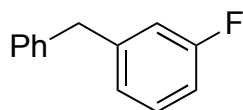

**1-Benzyl-3-fluorobenzene (13).** Prepared via General Procedure A (CsF as base) on a 0.30 mmol scale. The crude material was purified by silica gel chromatography (100% hexanes with 0.5% Et<sub>3</sub>N) to give compound **13** (run 1: 39 mg, 70%; run 2: 43 mg, 77%) as a colorless oil: <sup>1</sup>H NMR (400 MHz, CDCl<sub>3</sub>) δ 7.39 – 7.21 (m, 6H), 7.03 (ddd, *J* = 7.6, 2.0, 1.0 Hz, 1H), 6.98 – 6.89 (m, 2H), 4.02 (s, 2H); <sup>13</sup>C NMR (101 MHz, CDCl<sub>3</sub>) δ 163.0 (d, *J*<sub>C-F</sub> = 246.4 Hz), 143.7 (d, *J*<sub>C-F</sub> = 7.1 Hz), 140.3, 129.9 (d, *J*<sub>C-F</sub> = 8.1 Hz), 129.0, 128.6, 126.4, 124.6 (d, *J*<sub>C-F</sub> = 3.0 Hz), 115.8 (d, *J*<sub>C-F</sub> = 21.2 Hz), 113.0 (d, *J*<sub>C-F</sub> = 20.2 Hz), 41.7 (d, *J*<sub>C-F</sub> = 2.0 Hz); FTIR (NaCl/thin film) 3027, 2926, 1647, 1596, 1494, 1408,

1303, 1148, 1090, 957  $\text{cm}^{-1}$ ; HRMS (EI+)  $[\text{M}]^+$  calculated for  $\text{C}_{13}\text{H}_{11}\text{F}$ : 186.0845, found: 186.0846.

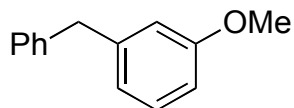

**1-Benzyl-3-methoxybenzene (14).** Prepared via General Procedure B ( $\text{K}_3\text{PO}_4$  as base) on a 0.30 mmol scale. The crude material was purified by silica gel chromatography (100% hexanes with 0.5%  $\text{Et}_3\text{N}$ ) to give compound **14** (49.0 mg, 83%) as a colorless oil:  $^1\text{H}$  NMR (400 MHz,  $\text{CDCl}_3$ )  $\delta$  7.40 – 7.31 (m, 2H), 7.31 – 7.21 (m, 4H), 6.85 (dt,  $J = 7.5, 1.2$  Hz, 1H), 6.83 – 6.79 (m, 2H), 4.02 (s, 2H), 3.82 (s, 3H);  $^{13}\text{C}$  NMR (101 MHz,  $\text{CDCl}_3$ )  $\delta$  159.7, 142.8, 141.0, 129.5, 129.0, 128.5, 126.2, 121.4, 114.8, 111.3, 55.2, 42.0. The spectral data for this compound matches that reported in the literature.<sup>10</sup>

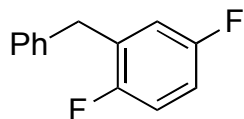

**2-Benzyl-1,4-difluorobenzene (15).** Prepared via General Procedure A ( $\text{CsF}$  as base) on a 0.30 mmol scale. The crude material was purified by silica gel chromatography (100% hexanes with 0.5%  $\text{Et}_3\text{N}$ ) to give compound **15** (run 1: 55.0 mg, 90%; run 2: 58.6 mg, 96%) as a colorless oil.

Diarylmethane **15** was also prepared via General Procedure B ( $\text{K}_3\text{PO}_4$  as base) on a 0.30 mmol scale. The crude material was purified as described above to give compound **15** (run 1: 61.5 mg, quantitative; run 2: 60.0 mg, 98%) as a colorless oil:  $^1\text{H}$  NMR (400 MHz,  $\text{CDCl}_3$ )  $\delta$  7.34 (dd,  $J = 8.0, 6.6$  Hz, 2H), 7.30 – 7.22 (m, 3H), 7.02 (td,  $J = 9.0, 4.5$  Hz, 1H), 6.94 – 6.79 (m, 2H), 4.00 (s, 2H);  $^{13}\text{C}$  NMR (101 MHz,  $\text{CDCl}_3$ )  $\delta$  158.9 (dd,  $J_{\text{C-F}} = 184.8, 3.0$  Hz), 156.5 (dd,  $J_{\text{C-F}} = 180.8, 2.0$  Hz), 139.0, 129.9 (dd,  $J_{\text{C-F}} = 19.2, 8.1$  Hz), 128.9, 128.7, 126.6, 117.2 (dd,  $J_{\text{C-F}} = 24.2, 5.1$  Hz), 116.2 (dd,  $J_{\text{C-F}} = 25.3, 9.1$  Hz), 114.2 (dd,  $J_{\text{C-F}} = 24.2, 8.1$  Hz), 34.8 (dd,  $J_{\text{C-F}} = 2.0, 2.0$  Hz); FTIR (NaCl/thin film) 3064, 3030, 2926, 2360, 2342, 1496, 1455, 1212, 957  $\text{cm}^{-1}$ ; HRMS (EI+)  $[\text{M}]^+$  calculated for  $\text{C}_{13}\text{H}_{10}\text{F}_2$ : 204.0751, found: 204.0754.

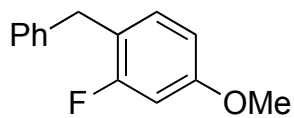

**1-Benzyl-2-fluoro-4-methoxybenzene (16).** Prepared via General Procedure B ( $\text{K}_3\text{PO}_4$  as base) on a 0.30 mmol scale. The crude material was purified by silica gel chromatography (100% hexanes with 0.5%  $\text{Et}_3\text{N}$ ) to give compound **16** (51.2 mg, 79%) as a colorless oil:  $^1\text{H}$  NMR (400 MHz,  $\text{CDCl}_3$ )  $\delta$  7.28

(s, 2H), 7.26 – 7.16 (m, 3H), 7.06 (t,  $J = 8.4$  Hz, 1H), 6.69 – 6.60 (m, 2H), 3.95 (s, 2H), 3.80 (s, 3H);  $^{13}\text{C}$  NMR (101 MHz,  $\text{CDCl}_3$ )  $\delta$  161.3 (d,  $J_{\text{C-F}} = 245.4$  Hz), 159.3 (d,  $J_{\text{C-F}} = 11.1$  Hz), 140.3, 131.2 (d,  $J_{\text{C-F}} = 7.1$  Hz), 128.7, 128.5, 126.1, 119.9 (d,  $J_{\text{C-F}} = 16.2$  Hz), 109.8 (d,  $J_{\text{C-F}} = 3.0$  Hz), 101.6 (d,  $J_{\text{C-F}} = 26.3$  Hz), 55.5, 34.2 (d,  $J_{\text{C-F}} = 2.0$  Hz); FTIR (NaCl/thin film) 3028, 2931, 2837, 1627, 1587, 1508, 1453, 1283, 1151, 1105, 1032, 954  $\text{cm}^{-1}$ ; HRMS (EI+)  $[\text{M}]^+$  calculated for  $\text{C}_{14}\text{H}_{13}\text{OF}$ : 216.0950, found: 216.0952.

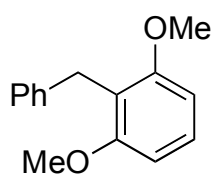

**2-Benzyl-1,3-dimethoxybenzene (17).** Prepared via General Procedure A (CsF as base) on a 0.30 mmol scale. The crude material was purified by silica gel chromatography (15% dichloromethane/hexanes with 0.5%  $\text{Et}_3\text{N}$ ) to give compound **17** (run 1: 61.0 mg, 90%; run 2: 64.0 mg, 94%) as a white solid.

Diarylmethane **17** was also prepared via General Procedure B ( $\text{K}_3\text{PO}_4$  as base) on a 0.30 mmol scale. The crude material was purified as described above to give compound **17** (run 1: 60.0 mg, 88%; run 2: 63.7 mg, 94%) as a white solid (67–71 °C):  $^1\text{H}$  NMR (400 MHz,  $\text{CDCl}_3$ )  $\delta$  7.38 – 7.07 (m, 6H), 6.62 (d,  $J = 8.3$  Hz, 2H), 4.09 (s, 2H), 3.86 (s, 6H);  $^{13}\text{C}$  NMR (101 MHz,  $\text{CDCl}_3$ )  $\delta$  158.3, 141.9, 128.6, 128.0, 127.3, 125.4, 117.7, 103.8, 55.8, 28.7. The spectral data for this compound matches that reported in the literature.<sup>12</sup>

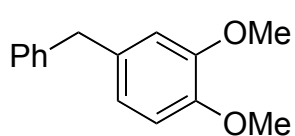

**4-Benzyl-1,2-dimethoxybenzene (18).** Prepared via General Procedure A (CsF as base) on a 0.30 mmol scale. The crude material was purified by silica gel chromatography (15% dichloromethane/hexanes with 0.5%  $\text{Et}_3\text{N}$ ) to give compound **18** (66.8 mg, 98%) as a colorless oil.

Diarylmethane **18** was also prepared via General Procedure B ( $\text{K}_3\text{PO}_4$  as base) on a 0.30 mmol scale. The crude material was purified as described above to give compound **18** (run 1: 66.0 mg, 97%; run 2: 68.3 mg, quantitative) as a colorless oil:  $^1\text{H}$  NMR (400 MHz,  $\text{CDCl}_3$ )  $\delta$  7.40 – 7.30 (m, 2H), 7.29 – 7.20 (m, 3H), 6.84 (d,  $J = 8.0$  Hz, 1H), 6.82 – 6.73 (m, 2H), 3.98 (s, 2H), 3.90 (s, 3H), 3.87 (s, 3H);  $^{13}\text{C}$  NMR (101 MHz,  $\text{CDCl}_3$ )  $\delta$  148.9, 147.4, 141.4,

<sup>12</sup> Ramachary, D. B.; Kishor, M. J. *Org. Chem.* **2007**, *72*, 5056.

133.7, 128.8, 128.5, 126.1, 120.9, 112.2, 111.1, 55.9, 55.8, 41.5. The spectral data for this compound matches that reported in the literature.<sup>13</sup>

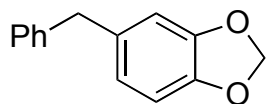

**5-Benzylbenzo[d][1,3]dioxole (19).** Prepared via General Procedure A (CsF as base) on a 0.30 mmol scale. The crude material was purified by silica gel chromatography (5% dichloromethane/hexanes with 0.5% Et<sub>3</sub>N) to give compound **19** (run 1: 56.7 mg, 83%; run 2: 60.0 mg, 87%) as a colorless oil: <sup>1</sup>H NMR (400 MHz, CDCl<sub>3</sub>) δ 7.40 – 7.31 (m, 2H), 7.31 – 7.18 (m, 3H), 6.84 – 6.77 (m, 1H), 6.76 – 6.67 (m, 2H), 5.96 (s, 2H), 3.95 (s, 2H); <sup>13</sup>C NMR (101 MHz, CDCl<sub>3</sub>) δ 147.8, 145.9, 141.3, 135.0, 128.8, 128.5, 126.2, 121.8, 109.5, 108.2, 100.9, 41.7; FTIR (NaCl/thin film) 3062, 2897, 1488, 1442, 1246, 1188, 1040, 930 cm<sup>-1</sup>; HRMS (EI+) [M]<sup>+</sup> calculated for C<sub>14</sub>H<sub>12</sub>O<sub>2</sub>: 212.0837, found: 212.0836.

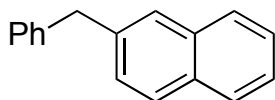

**2-Benzyl-naphthalene (20).** Prepared via General Procedure A (CsF as base) on a 0.30 mmol scale. The crude material was purified by silica gel chromatography (100% hexanes with 0.5% Et<sub>3</sub>N) to give compound **20** (run 1: 51.0 mg, 81%; run 2: 41.0 mg, 63%) as a colorless oil: <sup>1</sup>H NMR (400 MHz, CDCl<sub>3</sub>) δ 7.94 – 7.76 (m, 3H), 7.76 – 7.66 (m, 1H), 7.50 (ddd, *J* = 7.1, 4.8, 1.7 Hz, 2H), 7.43 – 7.22 (m, 6H), 4.21 (s, 2H); <sup>13</sup>C NMR (101 MHz, CDCl<sub>3</sub>) δ 141.0, 138.7, 133.6, 132.1, 129.1, 128.6, 128.1, 127.70, 127.68, 127.6, 127.2, 126.2, 126.0, 125.4, 42.2. The spectral data for this compound matches that reported in the literature.<sup>10</sup>

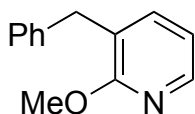

**3-Benzyl-2-methoxypyridine (21).** Prepared via General Procedure A (CsF as base) on a 0.30 mmol scale. The crude material was purified by silica gel chromatography (20% dichloromethane/hexanes with 0.5% Et<sub>3</sub>N) to give compound **21** (run 1: 56.0 mg, 93%; run 2: 54.0 mg, 91%) as a colorless oil.

Diarylmethane **21** was also prepared via General Procedure B (K<sub>3</sub>PO<sub>4</sub> as base) on a 0.30 mmol scale. The crude material was purified as described above to give compound **21** (run 1: 58.0 mg, 97%; run 2: 61.0 mg, quantitative) as a colorless oil: <sup>1</sup>H NMR (400 MHz,

<sup>13</sup> Schmink, J. R.; Leadbeater, N. E. *Org. Lett.* **2009**, *11*, 2575.

CDCl<sub>3</sub>) δ 8.07 (dd, *J* = 5.0, 1.9 Hz, 1H), 7.38 – 7.18 (m, 6H), 6.82 (dd, *J* = 7.2, 5.0 Hz, 1H), 4.00 (s, 3H), 3.95 (s, 2H); <sup>13</sup>C NMR (101 MHz, CDCl<sub>3</sub>) δ 162.0, 144.6, 139.6, 138.0, 129.1, 128.5, 126.2, 124.03, 116.8, 53.4, 35.6. The spectral data for this compound matches that reported in the literature.<sup>14</sup>

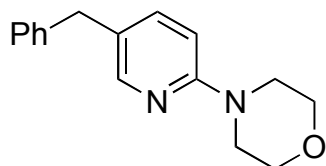

**4-(5-Benzylpyridin-2-yl)morpholine (22).** Prepared via General Procedure A (CsF as base) on a 0.30 mmol scale. The crude material was purified by silica gel chromatography (30:5:65 dichloromethane/acetone/hexanes with 0.5% Et<sub>3</sub>N) to give compound **22** (run 1: 39.0 mg, 51%; run 2: 35.6 mg, 48%; run 3: 37.5 mg, 49%) as a white solid (84–89 °C): <sup>1</sup>H NMR (400 MHz, CDCl<sub>3</sub>) δ 8.12 (d, *J* = 2.4 Hz, 1H), 7.41 – 7.25 (m, 3H), 7.25 – 7.10 (m, 3H), 6.61 (d, *J* = 8.7 Hz, 1H), 3.94 – 3.77 (m, 6H), 3.54 – 3.43 (m, 4H); <sup>13</sup>C NMR (101 MHz, CDCl<sub>3</sub>) δ 158.4, 147.8, 141.0, 138.3, 128.7, 128.5, 126.3, 126.2, 107.0, 66.8, 45.9, 38.1; FTIR (NaCl/thin film) 2960, 2919, 2852, 1744, 1607, 1492, 1451, 1403, 1244, 1221, 1120, 1070, 1029, 944 cm<sup>-1</sup>; HRMS (EI+) [M]<sup>+</sup> calculated for C<sub>16</sub>H<sub>18</sub>ON<sub>2</sub>: 254.1419, found: 254.1413.

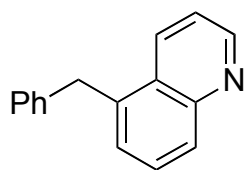

**5-Benzylquinoline (23).** Prepared via General Procedure A (CsF as base) on a 0.30 mmol scale. The crude material was purified by silica gel chromatography (15:5:5:75 dichloromethane/acetone/Et<sub>3</sub>N/hexanes) to give compound **23** (run 1: 38.0 mg, 53%; run 2: 50.8 mg, 77%) as a colorless oil.

Diarylmethane **23** was also prepared via General Procedure B (K<sub>3</sub>PO<sub>4</sub> as base) on a 0.30 mmol scale. The crude material was purified as described above to give compound **23** (run 1: 34.0 mg, 52%; run 2: 34.0 mg, 52%) as a colorless oil: <sup>1</sup>H NMR (400 MHz, CDCl<sub>3</sub>) δ 8.97 – 8.85 (m, 1H), 8.41 – 8.27 (m, 1H), 8.06 (d, *J* = 8.0 Hz, 1H), 7.69 (dd, *J* = 8.5, 7.0 Hz, 1H), 7.39 (ddd, *J* = 12.7, 7.8, 2.6 Hz, 2H), 7.33 – 7.26 (m, 2H), 7.26 – 7.15 (m, 3H), 4.47 (s, 2H); <sup>13</sup>C NMR (101 MHz, CDCl<sub>3</sub>) δ 150.0, 148.9, 140.1, 137.0, 132.7, 129.2, 128.61, 128.57, 128.5, 127.8,

<sup>14</sup> Nagaradja, E.; Chevallier, F.; Roisnel, T.; Jouikov, V.; Mongin, F. *Tetrahedron* **2012**, *14*, 3063.



127.2, 126.3, 120.9, 38.5; FTIR (NaCl/thin film) 3061, 3027, 2922, 2852, 1595, 1559, 1498, 1455, 821, 708; HRMS (EI+) [M]<sup>+</sup> calculated for C<sub>16</sub>H<sub>13</sub>N: 219.1048, found: 219.1048.

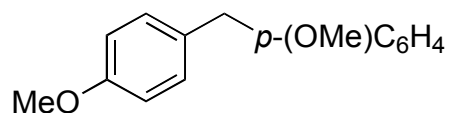

**Bis(4-methoxyphenyl)methane (24).** Prepared via General Procedure B (K<sub>3</sub>PO<sub>4</sub> as base) on a 0.20 mmol scale. The crude material was purified by silica gel chromatography (15% dichloromethane/hexanes with 0.5% Et<sub>3</sub>N) to give compound **24** (run 1: 45.0 mg, 98%; run 2: 40.0 mg, 87%) as a colorless oil: <sup>1</sup>H NMR (400 MHz, CDCl<sub>3</sub>) δ 7.18 – 7.05 (m, 4H), 6.92 – 6.80 (m, 4H), 3.91 (s, 2H), 3.82 (s, 6H); <sup>13</sup>C NMR (101 MHz, CDCl<sub>3</sub>) δ 157.9, 133.8, 129.8, 113.9, 55.3, 40.1. The spectral data for this compound matches that reported in the literature.<sup>15</sup>

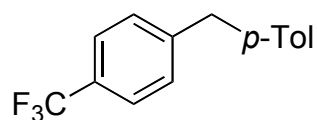

**1-Methyl-4-(4-(trifluoromethyl)benzyl)benzene (25).** Prepared via General Procedure A (CsF as base) on a 0.20 mmol scale. The crude material was purified by silica gel chromatography (100% hexanes with 0.5% Et<sub>3</sub>N) to give compound **25** (run 1: 43.3 mg, 87%; run 2: 45.0 mg, 90%) as a colorless oil.

Diarylmethane **25** was also prepared via General Procedure B (K<sub>3</sub>PO<sub>4</sub> as base) on a 0.20 mmol scale. The crude material was purified as described above to give compound **25** (run 1: 42.0 mg, 84%; run 2: 50.0 mg, quantitative) as a colorless oil: <sup>1</sup>H NMR (400 MHz, CDCl<sub>3</sub>) δ 7.57 (d, *J* = 8.1 Hz, 2H), 7.33 (d, *J* = 8.0 Hz, 2H), 7.16 (d, *J* = 8.0 Hz, 2H), 7.11 (d, *J* = 8.1 Hz, 2H), 4.03 (s, 2H), 2.37 (s, 3H); <sup>13</sup>C NMR (101 MHz, CDCl<sub>3</sub>) δ 145.6 (q, *J*<sub>C-F</sub> = 1.0 Hz), 137.0, 136.1, 129.4, 129.1, 128.8, 128.4 (q, *J*<sub>C-F</sub> = 32.3), 125.4 (q, *J*<sub>C-F</sub> = 4.0 Hz), 124.3 (q, *J*<sub>C-F</sub> = 272.7 Hz), 41.3, 21.1. The spectral data for this compound matches that reported in the literature.<sup>16</sup>

<sup>15</sup> Wilsily, A.; Nguyen, Y.; Fillion, E. *J. Am. Chem. Soc.* **2009**, *131*, 15606.

<sup>16</sup> Bedford, R. B.; Huwe, M.; Wilkinson, M. C. *Chem. Commun.* **2009**, *5*, 600.

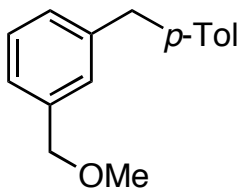

**1-(methoxymethyl)-3-(4-methylbenzyl)benzene (26).** Prepared via General Procedure B ( $K_3PO_4$  as base) on a 0.30 mmol scale. The crude material was purified by silica gel chromatography (10:5:85 dichloromethane/acetone/hexanes) to give compound **26** (60.0 mg, 94%)

as a colorless oil:  $^1H$  NMR (400 MHz,  $CDCl_3$ )  $\delta$  7.32 (d,  $J = 7.8$  Hz, 1H), 7.24 (d,  $J = 7.8$  Hz, 2H), 7.21 – 7.12 (m, 5H), 4.49 (s, 2H), 4.02 (s, 2H), 3.45 (s, 3H), 2.39 (s, 3H);  $^{13}C$  NMR (101 MHz,  $CDCl_3$ )  $\delta$  141.6, 138.4, 138.1, 135.6, 129.2, 128.9, 128.6, 128.3, 128.3, 125.5, 74.8, 58.2, 41.5, 21.1; FTIR (NaCl/thin film) 3020, 2980, 2921, 2846, 2830, 2734, 1608, 1513, 1488, 1447, 1379, 1193, 1153, 1105, 1022; HRMS (EI+)  $[M]^+$  calculated for  $C_{16}H_{18}O$ : 226.1358, found 226.1351.

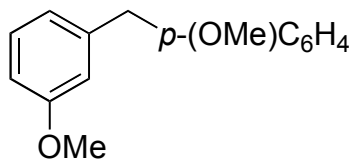

**1-Methoxy-3-(4-methoxybenzyl)benzene (27).** Prepared via General Procedure B ( $K_3PO_4$  as base) on a 0.20 mmol scale. The crude material was purified by silica gel chromatography (15%

dichloromethane/hexanes with 0.5%  $Et_3N$ ) to give compound **27** (run 1: 46.0 mg, 96%; run 2: 46.0 mg, 96%) as a colorless oil:  $^1H$  NMR (400 MHz,  $CDCl_3$ )  $\delta$  7.31 – 7.20 (m, 1H), 7.19 – 7.12 (m, 2H), 6.91 – 6.84 (m, 2H), 6.84 – 6.72 (m, 3H), 3.94 (s, 2H), 3.82 (s, 3H), 3.81 (s, 3H);  $^{13}C$  NMR (101 MHz,  $CDCl_3$ )  $\delta$  159.7, 158.0, 143.2, 133.1, 129.9, 129.4, 121.3, 114.7, 113.9, 111.2, 55.3, 55.2, 41.1. The spectral data for this compound matches that reported in the literature.<sup>17</sup>

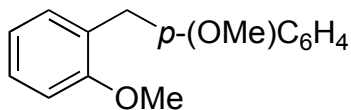

**1-Methoxy-2-(4-methoxybenzyl)benzene (28).** Prepared via General Procedure B ( $K_3PO_4$  as base) on a 0.20 mmol scale. The

crude material was purified by silica gel chromatography (15% dichloromethane/hexanes with 0.5%  $Et_3N$ ) to give compound **28** (run 1: 41.0 mg, 89%; run 2: 44.0 mg, 96%) as a colorless oil:  $^1H$  NMR (400 MHz,  $CDCl_3$ )  $\delta$  7.31 – 7.15 (m, 3H), 7.10 (dd,  $J = 7.3, 1.7$  Hz, 1H), 6.96 – 6.82 (m, 4H), 3.96 (s, 2H), 3.86 (s, 3H), 3.82 (s, 3H);  $^{13}C$  NMR (101 MHz,  $CDCl_3$ )  $\delta$

<sup>17</sup> Bedford, R. B.; Gower, N. J.; Haddow, M. F.; Harvey, J. N.; Nunn, J.; Okopie, R. A.; Sankey, R. F. *Angew. Chem. Int. Ed.* **2012**, *51*, 5435.

157.8, 157.3, 133.1, 130.2, 130.1, 129.9, 127.3, 120.5, 113.7, 110.4, 55.4, 55.3, 35.0. The spectral data for this compound matches that reported in the literature.<sup>18</sup>

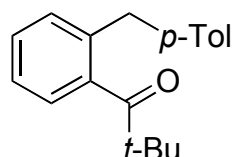

**2,2-Dimethyl-1-(2-(4-methylbenzyl)phenyl)propan-1-one (29).** Prepared via General Procedure A (CsF as base) on a 0.20 mmol scale. The crude material was purified by silica gel chromatography (15% dichloromethane/hexanes with 0.5% Et<sub>3</sub>N) to give compound **29** (run 1: 53.0 mg, quantitative; run 2: 44.0 mg, 83%) as a colorless oil.

Diarylmethane **29** was also prepared via General Procedure B (K<sub>3</sub>PO<sub>4</sub> as base) on a 0.20 mmol scale. The crude material was purified as described above to give compound **29** (run 1: 53.0 mg, quantitative; run 2: 55.3 mg, quantitative) as a colorless oil: <sup>1</sup>H NMR (400 MHz, CDCl<sub>3</sub>) δ 7.32 – 7.14 (m, 4H), 7.09 (m, 4H), 3.89 (s, 2H), 2.34 (s, 3H), 1.23 (s, 9H); <sup>13</sup>C NMR (101 MHz, CDCl<sub>3</sub>) δ 214.7, 140.7, 137.8, 137.3, 135.7, 130.7, 129.2, 129.1, 128.8, 125.3, 124.8, 44.9, 38.6, 27.6, 21.1; FTIR (NaCl/thin film) 2968, 2930, 2869, 1687, 1514, 1477, 1365, 1274, 1194, 964 cm<sup>-1</sup>; HRMS (EI+) [M]<sup>+</sup> calculated for C<sub>19</sub>H<sub>22</sub>O: 266.1671, found: 266.1668.

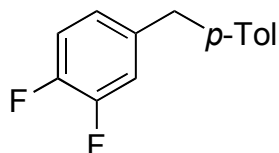

**1,2-Difluoro-4-(4-methylbenzyl)benzene (30).** Prepared via General Procedure A (CsF as base) on a 0.20 mmol scale. The crude material was purified by silica gel chromatography (100% hexanes with 0.5% Et<sub>3</sub>N) to give compound **30** (run 1: 36.0 mg, 82%; run 2: 34.0 mg, 77%) as a colorless oil.

Diarylmethane **30** was also prepared via General Procedure B (K<sub>3</sub>PO<sub>4</sub> as base) on a 0.20 mmol scale. The crude material was purified as described above to give compound **30** (run 1: 36.0 mg, 82%; run 2: 42.1 mg, 96%) as a colorless oil: <sup>1</sup>H NMR (400 MHz, CDCl<sub>3</sub>) δ 7.16 (d, *J* = 8.0 Hz, 2H), 7.14 – 7.05 (m, 3H), 6.99 (ddd, *J* = 11.3, 7.7, 2.2 Hz, 1H), 6.95 – 6.90 (m, 1H), 3.93 (s, 2H), 2.37 (s, 3H); <sup>13</sup>C NMR (101 MHz, CDCl<sub>3</sub>) δ 150.8 (dd, *J*<sub>C-F</sub> = 136.4, 13.1 Hz), 148.3 (dd, *J*<sub>C-F</sub> = 135.3, 13.1 Hz), 138.4 (dd, *J*<sub>C-F</sub> = 4.0, 4.0 Hz), 137.1, 136.1, 129.4, 128.7, 124.6 (dd, *J*<sub>C-F</sub> = 3.0, 3.0 Hz), 117.6 (d, *J*<sub>C-F</sub> = 17.2 Hz), 117.0 (d, *J*<sub>C-F</sub> = 17.2 Hz), 40.7

<sup>18</sup> Podder, S.; Choudhury, J.; Roy, U. K.; Roy, S. *J. Org. Chem.* **2007**, *72*, 3100.

(d,  $J_{C-F} = 1.0$  Hz), 21.1; FTIR (NaCl/thin film) 3022, 2923, 2858, 1607, 1515, 1434, 1282, 1209, 1115, 956  $\text{cm}^{-1}$ ; HRMS (EI+)  $[M]^+$  calculated for  $\text{C}_{14}\text{H}_{12}\text{F}_2$ : 218.0907, found: 218.0901.

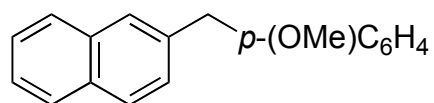

**2-(4-Methoxybenzyl)naphthalene (31).** Prepared via General Procedure B ( $\text{K}_3\text{PO}_4$  as base) on a 0.20 mmol scale.

The crude material was purified by silica gel chromatography (100% hexanes with 0.5%  $\text{Et}_3\text{N}$ ) to give compound **31** (49.0 mg, 99%) as a colorless oil:  $^1\text{H}$  NMR (400 MHz,  $\text{CDCl}_3$ )  $\delta$  7.90 – 7.77 (m, 3H), 7.69 (s, 1H), 7.58 – 7.45 (m, 2H), 7.38 (dd,  $J = 8.4, 1.8$  Hz, 1H), 7.24 – 7.17 (m, 2H), 6.95 – 6.87 (m, 2H), 4.15 (s, 2H), 3.85 (s, 3H);  $^{13}\text{C}$  NMR (101 MHz,  $\text{CDCl}_3$ )  $\delta$  158.1, 139.2, 133.7, 133.1, 132.1, 130.0, 128.1, 127.69, 127.66, 127.6, 127.0, 126.0, 125.4, 114.0, 55.3, 41.3. The spectral data for this compound matches that reported in the literature.<sup>19</sup>

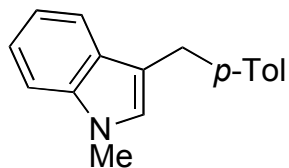

**1-Methyl-3-(4-methylbenzyl)-1H-indole (32).** Prepared via General Procedure A ( $\text{CsF}$  as base) on a 0.20 mmol scale. The crude material was purified by silica gel chromatography (15% dichloromethane/hexanes with 0.5%  $\text{Et}_3\text{N}$ ) to give compound **32**

(run 1: 30.5 mg, 65%; run 2: 27.0 mg, 57%) as a colorless oil.

Diarylmethane **32** was also prepared via General Procedure B ( $\text{K}_3\text{PO}_4$  as base) on a 0.20 mmol scale. The crude material was purified as described above to give compound **32** (40.2 mg, 86%) as a colorless oil:  $^1\text{H}$  NMR (400 MHz,  $\text{CDCl}_3$ )  $\delta$  7.58 (dt,  $J = 7.9, 1.0$  Hz, 1H), 7.37 – 7.32 (m, 1H), 7.31 – 7.20 (m, 3H), 7.20 – 7.07 (m, 3H), 6.79 (s, 1H), 4.12 (s, 2H), 3.77 (s, 3H), 2.37 (s, 3H);  $^{13}\text{C}$  NMR (101 MHz,  $\text{CDCl}_3$ )  $\delta$  138.4, 137.2, 135.3, 129.0, 128.6, 127.9, 127.1, 121.6, 119.2, 118.8, 114.6, 109.2, 32.6, 31.1, 21.1; FTIR (NaCl/thin film) 3047, 3021, 2917, 1514, 1473, 1423, 1374, 1327, 1251, 1153, 1012  $\text{cm}^{-1}$ ; HRMS (EI+)  $[M]^+$  calculated for  $\text{C}_{17}\text{H}_{17}\text{N}$ : 235.1361, found: 235.1363.

<sup>19</sup> Inés, B.; Moreno, I.; SanMartín, R.; Domínguez, E. *J. Org. Chem.* **2008**, *73*, 8448.

# Stereospecific Cross Coupling of Benzyl Ammonium Triflates to Give Diarylethanes

## General Procedure C

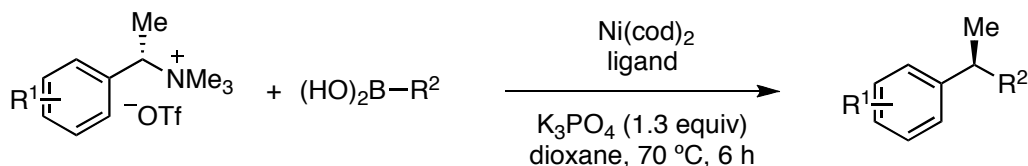

In a N<sub>2</sub>-atmosphere glovebox, Ni(cod)<sub>2</sub>, ligand, and K<sub>3</sub>PO<sub>4</sub> (1.3 equiv) were weighed into a 1-dram vial. Benzyl ammonium triflate (1.0 equiv) and boronic acid (1.2 equiv) were added, followed by dioxane (0.33 M). The vial was capped with a Teflon-lined cap and removed from the glovebox. The mixture was stirred for 6 h at 70 °C. The reaction mixture was then diluted with Et<sub>2</sub>O (1.5 mL) and filtered through a plug of silica gel, which was rinsed with Et<sub>2</sub>O (10 mL). The filtrate was concentrated and purified by silica gel chromatography to give the diarylethane product.

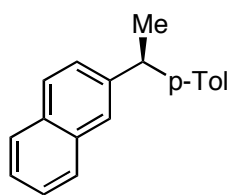

**(S)-2-(1-*p*-Tolyloethyl)naphthalene (34).** Diarylethane **34** was prepared via General Procedure C on a 0.26 mmol scale using Ni(cod)<sub>2</sub> (3 mol %) and P(*o*-Tol)<sub>3</sub> (7 mol %). The crude material was purified by silica gel chromatography (100% hexanes) to give compound **34** (run 1: 39.0 mg, 61%; run 2: 37.0 mg, 58%) as a colorless oil. The enantiomeric excess was determined to be 99% ee (run 1: 99% ee; run 2: 99% ee) by chiral HPLC analysis (CHIRALPAK IB, 0.4 mL/min, 100% hexane, λ=254 nm); *t*<sub>R</sub>(major)=21.70 min, *t*<sub>R</sub>(minor)=23.30 min. [α]<sub>D</sub><sup>24</sup> = +65.7° (c 1.20, CHCl<sub>3</sub>).

Diarylethane **34** was also prepared on a 0.2 mmol scale using Ni(cod)<sub>2</sub> (10 mol%) and P(*o*-Tol)<sub>3</sub> (22 mol%). The crude material was purified as described above to give compound **34** (35.4 mg, 72%) as a colorless oil. The enantiomeric excess was determined to be 97% ee by chiral HPLC analysis as described above: <sup>1</sup>H NMR (400 MHz, CDCl<sub>3</sub>) δ 7.91 – 7.70 (m, 4H), 7.56 – 7.45 (m, 2H), 7.37 (dd, *J* = 8.5, 1.9 Hz, 1H), 7.21 (d, *J* = 8.1 Hz, 2H), 7.16 (d, *J* = 8.1 Hz, 2H), 4.34 (q, *J* = 7.2 Hz, 1H), 2.38 (s, 3H), 1.78 (d, *J* = 7.2 Hz, 3H); <sup>13</sup>C NMR (101 MHz,

CDCl<sub>3</sub>)  $\delta$  144.0, 143.3, 135.6, 133.6, 132.1, 129.1, 128.0, 127.8, 127.7, 127.6, 126.9, 126.0, 125.4, 125.3, 44.5, 21.9, 21.1; FTIR (NaCl/thin film) 3052, 3019, 2966, 2928, 2872, 1511, 1452, 1375, 1020 cm<sup>-1</sup>; HRMS (EI+) [M]<sup>+</sup> calculated for C<sub>19</sub>H<sub>18</sub>: 246.1409, found: 246.1405.

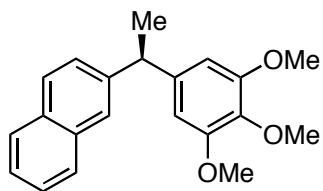

**(R)-2-(1-(3,4,5-Trimethoxyphenyl)ethyl)naphthalene (35).**

Diarylethane **35** was prepared via General Procedure C on a 0.26 mmol scale using Ni(cod)<sub>2</sub> (3 mol %) and P(*o*-Tol)<sub>3</sub> (7 mol %). The crude material was purified by silica gel chromatography (10% acetone/hexanes) to give compound **35** (run 1: 70.0 mg, 83%; run 2: 68.0 mg, 81%) as a colorless oil. The enantiomeric excess was determined to be 99% ee (run 1: 99% ee; run 2: 99%) by chiral HPLC analysis (CHIRALPAK IA, 0.8 mL/min, 3% *i*-PrOH/hexane,  $\lambda$ =254 nm);  $t_R$ (minor)=12.60 min,  $t_R$ (major)=13.98 min.  $[\alpha]_D^{24} = +37.6^\circ$  (c 1.88, CHCl<sub>3</sub>); <sup>1</sup>H NMR (400 MHz, CDCl<sub>3</sub>)  $\delta$  7.92 – 7.77 (m, 3H), 7.77 – 7.69 (m, 1H), 7.49 (m, 2H), 7.37 (dd,  $J = 8.5, 1.8$  Hz, 1H), 6.52 (s, 2H), 4.30 (q,  $J = 7.2$  Hz, 1H), 3.88 (s, 3H), 3.84 (s, 6H), 1.77 (d,  $J = 7.2$  Hz, 3H); <sup>13</sup>C NMR (101 MHz, CDCl<sub>3</sub>)  $\delta$  153.1, 143.6, 142.0, 136.2, 133.5, 132.1, 128.0, 127.8, 127.6, 126.7, 126.0, 125.5, 125.3, 104.8, 60.9, 56.1, 45.1, 22.0. The spectral data for this compound matches that reported in the literature.<sup>20</sup> The positive sign of the optical rotation enables assignment of the absolute configuration of **35** as *R*.<sup>20</sup>

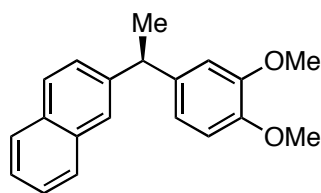

**(R)-2-(1-(3,4-Dimethoxyphenyl)ethyl)naphthalene (36).**

Diarylethane **36** was prepared via General Procedure C on a 0.26 mmol scale using Ni(cod)<sub>2</sub> (3 mol %) and P(*o*-Tol)<sub>3</sub> (7 mol %). The crude material was purified by silica gel chromatography (9% diethyl ether/hexanes) to give compound **36** (run 1: 39.0 mg, 51%; run 2: 38.0 mg, 50%) as a white solid (mp 65–70 °C). The enantiomeric excess was determined to be 95% ee (run 1: 94% ee; run 2: 95% ee) by chiral HPLC analysis (CHIRALPAK IC, 0.8 mL/min, 3% *i*-PrOH/hexane,  $\lambda$ =254 nm);  $t_R$ (minor)=17.21 min,  $t_R$ (major)=17.94 min.  $[\alpha]_D^{24} = +32.8^\circ$  (c 1.52, CHCl<sub>3</sub>); <sup>1</sup>H NMR (400 MHz, CDCl<sub>3</sub>)  $\delta$  7.89 – 7.75 (m, 3H), 7.76 – 7.70 (m, 1H), 7.48 (m, 2H), 7.35 (dd,  $J = 8.5, 1.8$  Hz, 1H), 6.90 – 6.83 (m, 2H), 6.80 (d,  $J = 1.6$  Hz, 1H), 4.30 (q,  $J = 7.2$  Hz, 1H), 3.89 (s, 3H), 3.84 (s, 3H), 1.76 (d,  $J = 7.2$  Hz, 3H); <sup>13</sup>C NMR (101 MHz, CDCl<sub>3</sub>)  $\delta$  148.8, 147.3, 144.1, 138.8,

<sup>20</sup> Taylor, B. L. H.; Swift, E. C.; Waetzig, J. D.; Jarvo, E. R. *J. Am. Chem. Soc.* **2011**, *133*, 389.

133.5, 132.1, 128.0, 127.8, 127.6, 126.8, 126.0, 125.4, 125.2, 119.5, 111.3, 111.0, 55.9, 55.8, 44.4, 22.0; FTIR (NaCl/thin film) 3051, 2962, 2931, 2833, 1516, 1458, 1251, 1235, 1143, 1028  $\text{cm}^{-1}$ ; HRMS (EI+)  $[\text{M}]^+$  calculated for  $\text{C}_{20}\text{H}_{20}\text{O}_2$ : 292.1463, found: 292.1467.

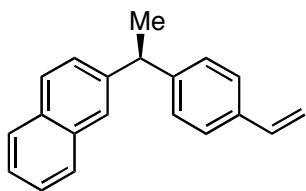

**(S)-2-(1-(4-vinylphenyl)ethyl)naphthalene (37).** Diarylethane **37** was prepared via General Procedure C on a 0.26 mmol scale using  $\text{Ni}(\text{cod})_2$  (3 mol %) and  $\text{P}(o\text{-Tol})_3$  (7 mol %). The crude material was purified by silica gel chromatography (100% hexanes) to give compound **37** (run 1: 45.0 mg, 67%; run 2: 47.0 mg, 69%) as a clear oil. The enantiomeric excess was determined to be 98% ee (run 1: 99% ee; run 2: 97% ee) by chiral HPLC analysis (CHIRALCEL IB, 0.8 mL/min, 100% hexane,  $\lambda=254$  nm);  $t_{\text{R}}(\text{major})=13.46$  min,  $t_{\text{R}}(\text{minor})=14.81$  min.  $[\alpha]_{\text{D}}^{24} = +44.8^\circ$  (c 1.47,  $\text{CHCl}_3$ );  $^1\text{H}$  NMR (400 MHz,  $\text{CDCl}_3$ )  $\delta$  7.95 – 7.70 (m, 4H), 7.50 (m, 2H), 7.46 – 7.34 (m, 3H), 7.34 – 7.21 (m, 2H), 6.75 (dd,  $J = 17.6, 10.9$  Hz, 1H), 5.77 (dd,  $J = 17.6, 1.0$  Hz, 1H), 5.26 (dd,  $J = 10.9, 1.0$  Hz, 1H), 4.37 (q,  $J = 7.2$  Hz, 1H), 1.79 (d,  $J = 7.2$  Hz, 3H);  $^{13}\text{C}$  NMR (101 MHz,  $\text{CDCl}_3$ )  $\delta$  146.0, 143.7, 136.6, 135.6, 133.6, 132.1, 128.04, 127.98, 127.8, 127.6, 126.9, 126.3, 126.0, 125.5, 125.4, 113.4, 44.6, 21.8. FTIR (NaCl/thin film) 3051, 2966, 2928, 841, 817, 746  $\text{cm}^{-1}$ ; HRMS (EI+)  $[\text{M}]^+$  calculated for  $\text{C}_{20}\text{H}_{18}$ : 258.1409, found: 258.1412.

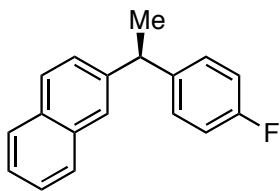

**(S)-2-(1-(4-fluorophenyl)ethyl)naphthalene ((S)-38).** Diarylethane **38** was prepared from ammonium triflate **33** and 4-fluorophenyl boronic acid via General Procedure C on a 0.26 mmol scale using  $\text{Ni}(\text{cod})_2$  (10 mol %) and  $\text{P}(o\text{-Tol})_3$  (22 mol %), except that  $\text{CsF}$  was used in place of  $\text{K}_3\text{PO}_4$ . The crude material was purified by silica gel chromatography (100% hexanes) to give compound (*S*)-**38** (61.0 mg, 94%) as a white solid. The enantiomeric excess was determined to be 98% ee by chiral HPLC analysis (CHIRALCEL OD-H, 0.8 mL/min, 100% hexane,  $\lambda=254$  nm);  $t_{\text{R}}(\text{major})=24.40$  min,  $t_{\text{R}}(\text{minor})=31.78$  min. The spectral data for (*S*)-**38** matches that of (*R*)-**38** reported below.

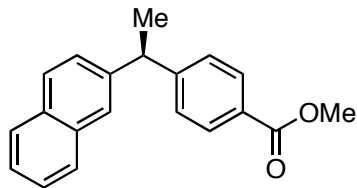

**(S)-methyl 4-(1-(naphthalen-2-yl)ethyl)benzoate (39).**

Diarylethane **39** was prepared via General Procedure C on a 0.26 mmol scale using Ni(cod)<sub>2</sub> (10 mol %) and P(*o*-Tol)<sub>3</sub> (22 mol %), except that CsF was used in place of K<sub>3</sub>PO<sub>4</sub>. The crude material was purified by silica gel chromatography (15-19% Et<sub>2</sub>O/hexanes) to give compound **39** (run 1: 51.0 mg, 68%, run 2: 56.0 mg, 74%) as a white solid (mp 75–78 °C). The enantiomeric excess was determined to be 98% ee (run 1: 98% ee; run 2: 97% ee) by chiral HPLC analysis (CHIRALCEL IB, 0.6 mL/min, 1% *i*-PrOH/hexane, λ = 254 nm); *t*<sub>R</sub> (major)=17.22 min, *t*<sub>R</sub> (minor)=19.57 min. [α]<sub>D</sub><sup>24</sup> = +12.5° (c 1.03, CHCl<sub>3</sub>); <sup>1</sup>H NMR (400 MHz, CDCl<sub>3</sub>) δ 8.04 – 7.97 (m, 2H), 7.87 – 7.81 (m, 2H), 7.79 (d, *J* = 8.5 Hz, 1H), 7.75 – 7.70 (m, 1H), 7.55 – 7.44 (m, 2H), 7.37 (d, *J* = 8.2 Hz, 2H), 7.30 (d, *J* = 13.1 Hz, 1H), 4.40 (q, *J* = 7.2 Hz, 1H), 3.93 (s, 3H), 1.78 (d, *J* = 7.2 Hz, 3H); <sup>13</sup>C NMR (101 MHz, CDCl<sub>3</sub>) δ 167.1, 151.6, 142.8, 133.5, 132.2, 129.8, 128.2, 128.1, 127.8, 127.8, 127.6, 126.6, 126.1, 125.6, 125.5, 52.1, 44.9, 21.6; FTIR (NaCl/thin film) 3054, 2968, 2361, 2338, 1718, 1280, 1110 cm<sup>-1</sup>; LRMS (EI+) [M]<sup>+</sup> calculated for C<sub>20</sub>H<sub>18</sub>O<sub>2</sub>: 290.1, found: 290.2.

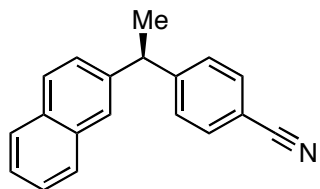

**(S)-4-(1-(naphthalen-2-yl)ethyl)benzotrile (40).**

Diarylethane **40** was prepared via General Procedure C on a 0.5 mmol scale using Ni(cod)<sub>2</sub> (1 mol %) and P(*o*-Tol)<sub>3</sub> (3 mol %). The crude material was purified by silica gel chromatography (10% Et<sub>2</sub>O/hexanes) to give compound **40** (95.0 mg, 76%) as a pale yellow solid (mp 84–90 °C). The enantiomeric excess was determined to be 95% ee by chiral HPLC analysis (CHIRALCEL IC, 0.5 mL/min, 3% *i*-PrOH/hexane, λ = 254 nm); *t*<sub>R</sub>(major)=32.79 min, *t*<sub>R</sub>(minor)=34.15 min. [α]<sub>D</sub><sup>24</sup> = +42.8° (c 3.03, CHCl<sub>3</sub>); <sup>1</sup>H NMR (400 MHz, CDCl<sub>3</sub>) δ 7.88 – 7.78 (m, 3H), 7.74 – 7.70 (m, 1H), 7.63 – 7.58 (m, 2H), 7.56 – 7.46 (m, 2H), 7.41 – 7.35 (m, 2H), 7.31 – 7.25 (m, 1H), 4.39 (q, *J* = 7.2 Hz, 1H), 1.78 (d, *J* = 7.2 Hz, 3H); <sup>13</sup>C NMR (101 MHz, CDCl<sub>3</sub>) δ 151.8, 142.1, 133.5, 132.32, 132.26, 128.6, 128.4, 127.8, 127.7, 126.4, 126.3, 125.8, 125.6, 119.1, 110.0, 45.0, 21.4; FTIR (NaCl/thin film) 3053, 2968, 2929, 2226, 1605, 1502, 840, 820, 751 cm<sup>-1</sup>; HRMS (EI+) [M]<sup>+</sup> calculated for C<sub>19</sub>H<sub>15</sub>N: 257.1205, found: 257.1209.



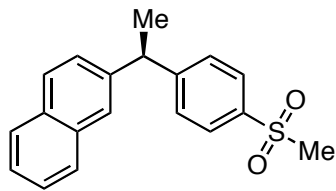

**(S)-4-(1-(naphthalen-2-yl)ethyl)benzointrile (41).** Diarylethane **41** was prepared via General Procedure C on a 0.26 mmol scale using Ni(cod)<sub>2</sub> (3 mol %) and P(*o*-Tol)<sub>3</sub> (7 mol %). The crude material was purified by silica gel chromatography (8% acetone/0.5% Et<sub>3</sub>N/hexanes) to give compound **41** (run 1: 77.0 mg, 97%, run 2: 72.0 mg, 91%) as a white solid (mp 123–126 °C). The enantiomeric excess was determined to be 97% ee (run 1: 97% ee, run 2: 96% ee) by chiral HPLC analysis (CHIRALCEL IB, 1.0 mL/min, 8% *i*-PrOH/hexane,  $\lambda$  =254 nm);  $t_R$ (major)=26.71 min,  $t_R$ (minor)=29.51 min.  $[\alpha]_D^{24} = +29.4^\circ$  (c 1.76, CHCl<sub>3</sub>): <sup>1</sup>H NMR (400 MHz, CDCl<sub>3</sub>)  $\delta$  7.91 – 7.77 (m, 5H), 7.75 – 7.70 (m, 1H), 7.55 – 7.44 (m, 4H), 7.29 (d,  $J = 7.2$  Hz, 1H), 4.43 (q,  $J = 7.2$  Hz, 1H), 3.06 (s, 3H), 1.79 (d,  $J = 7.2$  Hz, 3H); <sup>13</sup>C NMR (101 MHz, CDCl<sub>3</sub>)  $\delta$  152.8, 142.1, 138.3, 133.5, 132.3, 128.8, 128.4, 127.8, 127.7, 127.6, 126.4, 126.3, 125.8, 125.6, 44.9, 44.6, 21.5; FTIR (NaCl/thin film) 3054, 2969, 2928, 1595, 1306, 1150, 1090, 955, 763 cm<sup>-1</sup>; HRMS (EI+) [M]<sup>+</sup> calculated for C<sub>19</sub>H<sub>18</sub>O<sub>2</sub>S: 310.1028, found: 310.1023.

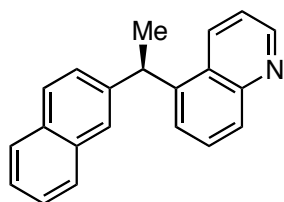

**(R)-5-(1-(naphthalen-2-yl)ethyl)quinoline (42).** Diarylethane **42** was prepared via General Procedure C on a 0.1 mmol scale using Ni(cod)<sub>2</sub> (10 mol %) and P(*o*-Tol)<sub>3</sub> (22 mol %). The crude material was purified by silica gel chromatography (7% acetone/11% dichloromethane/3% Et<sub>3</sub>N/hexanes) to give compound **42** (15.0 mg, 53%) as a clear oil. The enantiomeric excess was determined to be 52% ee by chiral HPLC analysis (CHIRALCEL IB, 1.0 mL/min, 5% *i*-PrOH/hexane,  $\lambda$  =254 nm);  $t_R$ (minor)=12.59 min,  $t_R$ (major)=14.51 min. <sup>1</sup>H NMR (600 MHz, CDCl<sub>3</sub>)  $\delta$  8.88 (dd,  $J = 4.2, 1.7$  Hz, 1H), 8.45 – 8.38 (m, 1H), 8.07 (d,  $J = 8.4$  Hz, 1H), 7.84 – 7.72 (m, 4H), 7.70 – 7.66 (m, 1H), 7.59 (d,  $J = 7.2$  Hz, 1H), 7.46 (pd,  $J = 6.9, 1.5$  Hz, 2H), 7.38 – 7.29 (m, 2H), 5.05 (q,  $J = 7.1$  Hz, 1H), 1.89 (d,  $J = 7.1$  Hz, 3H); <sup>13</sup>C NMR (151 MHz, CDCl<sub>3</sub>)  $\delta$  149.8, 148.9, 143.7, 141.8, 133.6, 132.4, 132.1, 129.1, 128.5, 128.3, 127.7, 127.6, 126.9, 126.4, 126.1, 125.5, 125.0, 120.8, 40.6, 22.5; <sup>13</sup>C NMR (151 MHz, (CD<sub>3</sub>)<sub>2</sub>CO)  $\delta$  149.8, 149.1, 144.1, 142.2, 133.7, 132.3, 132.1, 128.8, 128.4, 128.1, 127.6, 127.5, 126.7, 126.4, 126.0, 125.5, 125.4,

124.7, 120.9, 40.1, 21.9;<sup>21</sup> FTIR (NaCl/thin film) 3054, 2966, 2927, 2361, 2341, 1501, 802 cm<sup>-1</sup>; LRMS (EI+) [M]<sup>+</sup> calculated for C<sub>21</sub>H<sub>17</sub>N: 283.1, found: 283.2.

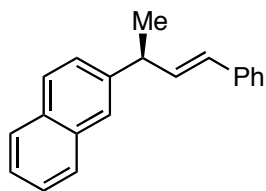

**(*S,E*)-2-(4-Phenylbut-3-en-2-yl)naphthalene (43).** Diarylethane **43** was prepared via General Procedure C on a 1.36 mmol scale using Ni(cod)<sub>2</sub> (2 mol %) and P(*o*-Tol)<sub>3</sub> (5 mol %). The crude material was purified by silica gel chromatography (100% hexanes) to give compound **43** (run 1: 334 mg, 96%, run 2: 335 mg, 96%) as a white solid (mp 81–86 °C). The enantiomeric excess was determined to be 99% ee (run 1: 99% ee; run 2: 99% ee) by chiral HPLC analysis (CHIRALCEL OD-H, 0.8 mL/min, 100% hexane, λ=254 nm); *t*<sub>R</sub>(major)=34.24 min, *t*<sub>R</sub>(minor)=37.38 min. [α]<sub>D</sub><sup>24</sup> = -21.0° (c 8.40, CHCl<sub>3</sub>); <sup>1</sup>H NMR (400 MHz, CDCl<sub>3</sub>) δ 7.88 – 7.82 (m, 3H), 7.77 – 7.74 (m, 1H), 7.55 – 7.45 (m, 3H), 7.45 – 7.40 (m, 2H), 7.38 – 7.31 (m, 2H), 7.31 – 7.22 (m, 1H), 6.54 – 6.50 (m, 2H), 3.86 (m, 1H), 1.61 (d, *J* = 7.0 Hz, 3H); <sup>13</sup>C NMR (101 MHz, CDCl<sub>3</sub>) δ 143.1, 137.5, 135.1, 133.7, 132.3, 128.8, 128.6, 128.1, 127.7, 127.6, 127.1, 126.4, 126.2, 126.0, 125.4, 125.3, 42.7, 21.2. The spectral data for this compound matches that reported in the literature.<sup>22</sup>

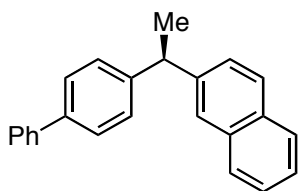

**(*R*)-2-(1-(Biphenyl-4-yl)ethyl)naphthalene (44).** Diarylethane **44** was prepared via General Procedure C on a 0.20 mmol scale using Ni(cod)<sub>2</sub> (10 mol %) and *t*-Bu-XantPhos (12 mol %). The crude material was purified by silica gel chromatography (100% hexanes) to give compound **44** (29.0 mg, 46%) as a white solid (mp 83–85 °C). The enantiomeric excess was determined to be 98% ee by chiral HPLC analysis (CHIRALPAK IB, 0.8 mL/min, 2% *i*-PrOH/hexane, λ=254 nm); *t*<sub>R</sub>(major)=8.60 min, *t*<sub>R</sub>(minor)=10.0 min. [α]<sub>D</sub><sup>24</sup> = -24.0° (c 1.44, CHCl<sub>3</sub>); <sup>1</sup>H NMR (400 MHz, CDCl<sub>3</sub>) δ 7.88 – 7.76 (m, 4H), 7.63 – 7.53 (m, 4H), 7.53 – 7.41 (m, 4H), 7.41 – 7.32 (m, 4H), 4.40 (q, *J* = 7.2 Hz, 1H), 1.81 (d, *J* = 7.2 Hz, 3H); <sup>13</sup>C NMR (101 MHz, CDCl<sub>3</sub>) δ 145.4, 143.7, 141.0, 139.0, 133.5, 132.1, 128.7, 128.2, 128.0, 127.8, 127.6, 127.2, 127.1, 127.0, 126.9, 126.0, 125.4, 125.4, 44.6, 21.8; FTIR (NaCl/thin film) 3053, 3026,

<sup>21</sup> We observe coincident peaks in the <sup>13</sup>C NMR spectrum when CDCl<sub>3</sub> is used as solvent. However, all 21 peaks are distinct when (CD<sub>3</sub>)<sub>2</sub>CO is used as solvent.

<sup>22</sup> Li, C.; Xing, J.; Zhao, J.; Huynh, P.; Zhang, W.; Jiang, P.; Zhang, Y. *J. Org. Lett.* **2012**, *14*, 390.

2965, 2927, 1600, 1486, 1449, 1008  $\text{cm}^{-1}$ ; HRMS (EI+)  $[\text{M}]^+$  calculated for  $\text{C}_{24}\text{H}_{20}$ : 308.1565, found: 308.1561.

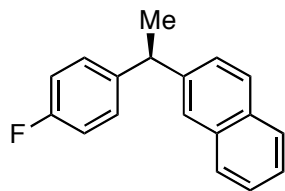

**(R)-2-(1-(4-Fluorophenyl)ethyl)naphthalene ((R)-38).** Diarylethane (*R*)-**38** was prepared from (*R*)-1-(4-fluorophenyl)-*N,N,N*-trimethylethanaminium trifluoromethanesulfonate and 2-naphthylboronic acid via General Procedure C on a 0.20 mmol scale using  $\text{Ni}(\text{cod})_2$  (10 mol %) and *t*-Bu-XantPhos (12 mol %). The crude material was purified by silica gel chromatography (100% hexanes) to give compound (*R*)-**38** (run 1: 18.0 mg, 36%; run 2: 20.0 mg, 38%) as a pale green solid (mp 54–58 °C). The enantiomeric excess was determined to be 95% ee (run 1: 95% ee; run 2: 95% ee) by chiral HPLC analysis (CHIRALCEL OD-H, 0.8 mL/min, 100% hexane,  $\lambda=254$  nm);  $t_{\text{R}}(\text{minor})=25.96$  min,  $t_{\text{R}}(\text{major})=33.26$  min.  $[\alpha]_{\text{D}}^{24} = -25.2^\circ$  (c 1.88,  $\text{CHCl}_3$ ):  $^1\text{H}$  NMR (400 MHz,  $\text{CDCl}_3$ )  $\delta$  7.86 – 7.74 (m, 3H), 7.73 – 7.67 (m, 1H), 7.54 – 7.41 (m, 2H), 7.34 – 7.19 (m, 3H), 7.04 – 6.95 (m, 2H), 4.32 (q,  $J = 7.2$  Hz, 1H), 1.74 (d,  $J = 7.2$  Hz, 3H);  $^{13}\text{C}$  NMR (101 MHz,  $\text{CDCl}_3$ )  $\delta$  161.3 (d,  $J_{\text{C-F}} = 245.4$  Hz), 143.6, 141.9 (d,  $J_{\text{C-F}} = 4.0$  Hz), 133.5, 132.1, 129.1 (d,  $J_{\text{C-F}} = 7.1$  Hz), 128.1, 127.7, 127.6, 126.7, 126.1, 125.5, 125.3, 115.1 (d,  $J_{\text{C-F}} = 21.2$  Hz), 44.1, 21.9; FTIR (NaCl/thin film) 3054, 2966, 2924, 2851, 1507, 1221, 1158  $\text{cm}^{-1}$ ; HRMS (EI+)  $[\text{M}]^+$  calculated for  $\text{C}_{18}\text{H}_{15}\text{F}$ : 250.1158, found: 250.1160.

X-ray quality crystals were prepared by slow evaporation from pentane. The crystal structure demonstrated that the absolute configuration is *R* (Fig S1).

**Figure S1.** Molecular diagram of (*R*)-**38** with ellipsoids at 30% probability. Tertiary H-atom depicted with arbitrary radius. All other H-atoms and a second symmetry-unique compound molecule are omitted for clarity. (CCDC-899360)

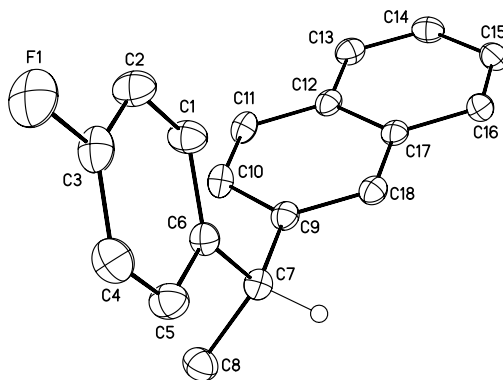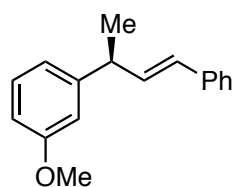

**(*S,E*)-1-Methoxy-3-(4-phenylbut-3-en-2-yl)benzene (45).** Aryl vinyl ethane **45** was prepared via General Procedure C on a 0.20 mmol scale using Ni(cod)<sub>2</sub> (15 mol %) and P(*o*-Tol)<sub>3</sub> (32 mol %). The crude material was purified by silica gel chromatography (100% hexanes) to give compound **45** (run 1: 26.0 mg, 55%; run 2: 27.0 mg, 56%) as a colorless oil. The enantiomeric excess was determined to be 98% ee (run 1: 98% ee; run 2: 97% ee) by chiral HPLC analysis (CHIRALPAK IB, 1.0 mL/min, 100% hexane,  $\lambda=254$  nm);  $t_R(\text{major})=15.46$  min,  $t_R(\text{minor})=18.19$  min.  $[\alpha]_D^{24} = -25.2^\circ$  (c 1.00, CHCl<sub>3</sub>)<sup>23</sup>; <sup>1</sup>H NMR (400 MHz, CDCl<sub>3</sub>)  $\delta$  7.44 – 7.19 (m, 6H), 6.95 – 6.77 (m, 3H), 6.52 – 6.36 (m, 2H), 3.85 (s, 3H), 3.66 (q,  $J = 6.8$  Hz, 1H), 1.50 (d,  $J = 7.0$  Hz, 3H); <sup>13</sup>C NMR (101 MHz, CDCl<sub>3</sub>)  $\delta$  159.7, 147.4, 137.5, 135.0, 129.5, 128.6, 128.5, 127.1, 126.2, 119.8, 113.3, 111.3, 55.2, 42.6, 21.2. The spectral data for this compound matches that reported in the literature.<sup>22</sup>

<sup>23</sup> Based on the optical rotation of diarylethane **35** and the crystal structure of diarylethane (*R*)-**38**, we are confident that these Suzuki reactions proceed with inversion of configuration and have thus assigned the absolute configuration of compound **45** as *S*. However, we note that the sign of the optical rotation is in disagreement with the previously reported value (see ref 22). The reasons for this discrepancy are unclear. We have obtained a negative optical rotation for this compound on two polarimeters and at two different concentrations.

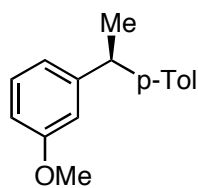

**(S)-1-Methoxy-3-(1-*p*-tolylethyl)benzene (46).**

Diarylethane **46** was prepared via General Procedure C on a 0.20 mmol scale using Ni(cod)<sub>2</sub> (15 mol %) and P(*o*-Tol)<sub>3</sub> (32 mol %). The crude material was purified by silica gel chromatography (100% hexanes) to give compound **46** (run 1: 22.0 mg, 49%; run 2: 26 mg, 58%) as a colorless oil. The enantiomeric excess was determined to be 91% ee (run 1: 90% ee, run 2: 92% ee) by chiral HPLC analysis (CHIRALPAK IA, 0.8 mL/min, 1% *i*-PrOH/hexane,  $\lambda=254$  nm);  $t_R(\text{minor})=5.73$  min,  $t_R(\text{major})=6.17$  min.  $[\alpha]_D^{24} = +15.4^\circ$  (c 0.96, CHCl<sub>3</sub>): <sup>1</sup>H NMR (400 MHz, CDCl<sub>3</sub>)  $\delta$  7.24 (t,  $J = 7.9$  Hz, 1H), 7.19 – 7.10 (m, 4H), 6.88 – 6.80 (m, 2H), 6.76 (ddd,  $J = 8.1, 2.6, 0.9$  Hz, 1H), 4.13 (q,  $J = 7.2$  Hz, 1H), 3.81 (s, 3H), 2.35 (s, 3H), 1.65 (d,  $J = 7.2$  Hz, 3H); <sup>13</sup>C NMR (101 MHz, CDCl<sub>3</sub>)  $\delta$  159.6, 148.3, 143.2, 135.5, 129.3, 129.1, 127.4, 120.1, 113.7, 110.8, 55.1, 44.4, 21.9, 21.0. The spectral data for this compound matches that reported in the literature.<sup>24</sup>

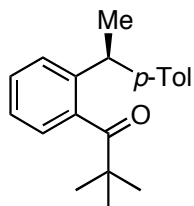

**(S)-2,2-dimethyl-1-(2-(1-*p*-tolylethyl)phenyl)propan-1-one (50).**

Diarylethane **50** was prepared via General Procedure C on a 0.10 mmol scale using Ni(cod)<sub>2</sub> (10 mol %) and PPh<sub>2</sub>Cy (22 mol %). The crude material was purified by silica gel chromatography (100% hexanes) to give compound **50** (17.0 mg, 64%) as a colorless oil. The enantiomeric excess was determined to be 33% ee by chiral HPLC analysis (CHIRALPAK IA, 1.0 mL/min, 3% *i*-PrOH/hexane,  $\lambda = 254$  nm);  $t_R(\text{major})=5.70$  min,  $t_R(\text{minor})=6.39$  min.  $[\alpha]_D^{24} = +15.4^\circ$  (c 0.96, CHCl<sub>3</sub>): <sup>1</sup>H NMR (600 MHz, CDCl<sub>3</sub>)  $\delta$  7.21 (ddd,  $J = 8.4, 5.2, 3.3$  Hz, 1H), 7.19 – 7.16 (m, 1H), 7.11 – 7.08 (m, 2H), 7.06 – 7.04 (m, 2H), 7.01 – 6.99 (m, 2H), 3.97 (q,  $J = 7.1$  Hz, 1H), 2.22 (s, 3H), 1.52 (d,  $J = 7.1$  Hz, 3H), 1.15 (s, 9H); <sup>13</sup>C NMR (151 MHz, CDCl<sub>3</sub>)  $\delta$  215.0, 143.3, 142.5, 140.4, 135.6, 128.97, 128.95, 128.2, 127.6, 125.0, 124.6, 44.9, 40.6, 27.8, 22.4, 21.0; FTIR (NaCl/thin film) 2968, 2931, 2871, 1685, 1513, 1477, 1460, 1392, 1365, 1277, 1184, 1109, 1041, 1020, 963, 943, 821, 765 cm<sup>-1</sup>; LRMS (EI+) [M-(*t*-Bu)]<sup>+</sup> calculated for C<sub>16</sub>H<sub>15</sub>O: 223.11, found: 223.20.

<sup>24</sup> Nakamura, R.; Obora, Y.; Ishii, Y. *Chem. Commun.* **2008**, 29, 3417.

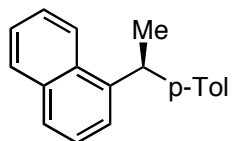

**(S)-1-(1-*p*-Tolyloethyl)naphthalene (S1).** Diarylethane **S1** was prepared via General Procedure C on a 0.26 mmol scale using Ni(cod)<sub>2</sub> (3 mol %) and P(*o*-Tol)<sub>3</sub> (7 mol %). The crude material was purified by silica gel chromatography (100% hexanes) to give compound **S1** (34.0 mg, 70%) as a colorless oil. The enantiomeric excess was determined to be 67% ee by chiral HPLC analysis (CHIRALPAK IB, 0.4 mL/min, 100% hexane, λ=254 nm); *t*<sub>R</sub>(major)=30.70 min, *t*<sub>R</sub>(minor)=38.65 min. <sup>1</sup>H NMR (400 MHz, CDCl<sub>3</sub>) δ 8.19 – 8.04 (m, 1H), 7.97 – 7.86 (m, 1H), 7.84 – 7.73 (m, 1H), 7.59 – 7.44 (m, 4H), 7.22 – 7.15 (m, 2H), 7.12 (d, *J* = 8.0 Hz, 2H), 4.94 (q, *J* = 7.1 Hz, 1H), 2.34 (s, 3H), 1.80 (d, *J* = 7.1 Hz, 3H); <sup>13</sup>C NMR (101 MHz, CDCl<sub>3</sub>) δ 143.7, 141.8, 135.5, 134.0, 131.7, 129.2, 128.8, 127.5, 126.9, 125.9, 125.5, 125.3, 124.3, 124.0, 40.2, 22.7, 21.1; FTIR (NaCl/thin film) 3047, 2966, 2931, 2871, 1510, 1449, 1396, 1373, 1020 cm<sup>-1</sup>; HRMS (EI+) [M]<sup>+</sup> calculated for C<sub>19</sub>H<sub>18</sub>: 246.1409, found: 246.1407.

## Preparation of Benzyl Ammonium Triflates

### General Procedure for the Preparation of Benzyl Ammonium Triflates: Preparation of *N,N,N*-Trimethyl-1-phenylmethanaminium trifluoromethanesulfonate (**1b**)

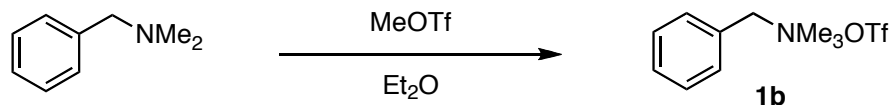

Dimethylbenzylamine (2.5 g, 18.5 mmol, 1.0 equiv) was dissolved in Et<sub>2</sub>O (15 mL, 4.0 M). MeOTf (2.7 mL, 23.9 mmol, 1.3 equiv) was added dropwise at 0 °C. White precipitate formed immediately. After complete addition the reaction mixture was stirred for an additional 15 minutes at 0 °C. The precipitate was isolated by filtration and washed with Et<sub>2</sub>O (2 x 20 mL). The resulting solid was dried under vacuum to give salt **1b** (5.34 g, 97%) as a white solid (mp 97–99 °C): <sup>1</sup>H NMR (600 MHz, CDCl<sub>3</sub>) δ 7.57 – 7.46 (m, 5H), 4.64 (s, 2H), 3.22 (s, 9H); <sup>13</sup>C NMR (151 MHz, CDCl<sub>3</sub>) δ 132.9, 131.0, 129.4, 127.1, 120.7 (q, *J*<sub>C-F</sub> = 320.1 Hz), 69.6, 52.5; <sup>19</sup>F NMR (565 MHz, CDCl<sub>3</sub>) δ –78.5; FTIR (NaCl/thin film) 3038, 2968, 2254, 1653, 1480, 1457, 1259, 1155, 1031, 920 cm<sup>-1</sup>; LRMS (APCI+) [M–OTf]<sup>+</sup> calculated for [C<sub>10</sub>H<sub>16</sub>N]<sup>+</sup>: 150.1, found: 150.1.

The ammonium triflate salts were used as prepared without further purification. The <sup>1</sup>H and <sup>13</sup>C NMR spectra for all salts are included below.

Please note: Salts have been observed to decompose in solution over the course of 1 week, but can be stored indefinitely in the solid form.

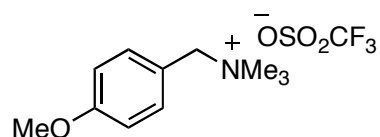

**1-(4-Methoxyphenyl)-*N,N,N*-trimethylmethanaminium trifluoromethanesulfonate (S2).** Prepared according to the General Procedure on 5.10 mmol scale to give salt **S3** (1.55 g, 94%) as a light pink solid (mp 96–99 °C): <sup>1</sup>H NMR (600 MHz, CDCl<sub>3</sub>) δ 7.48 – 7.39 (m, 2H), 7.06 – 6.88 (m, 2H), 4.52 (s, 2H), 3.83 (s, 3H), 3.13 (s, 9H); <sup>13</sup>C NMR (151 MHz, CDCl<sub>3</sub>) δ 161.5, 134.3, 120.7 (q, *J*<sub>C-F</sub> = 320.1 Hz), 119.0, 114.7, 69.3, 55.4, 52.1; <sup>19</sup>F NMR (565 MHz, CDCl<sub>3</sub>) δ –78.4; FTIR (NaCl/thin film) 3040, 2967, 2843, 1614, 1517, 1481, 1257, 1225, 1160, 1030 cm<sup>-1</sup>; LRMS (APCI+) [M–OTf]<sup>+</sup> calculated for [C<sub>11</sub>H<sub>18</sub>NO]<sup>+</sup>: 180.1, found: 180.1.

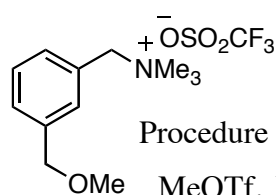

**1-(3-(Methoxymethyl)phenyl)-*N,N,N*-trimethylmethanaminium trifluoromethanesulfonate (S3).** Prepared according to the General

Procedure on 8.50 mmol scale. In this case, a precipitate did not form upon addition of MeOTf. Instead, two distinct layers formed. The top layer was decanted off. The bottom layer was washed with Et<sub>2</sub>O (2 x 10 mL) and then dried under vacuum to give salt **S3** (2.92 g, 99%) as a light yellow viscous oil: <sup>1</sup>H NMR (400 MHz, CDCl<sub>3</sub>) δ 7.51 – 7.35 (m, 4H), 4.53 (s, 2H), 4.44 (s, 2H), 3.37 (s, 3H), 3.11 (s, 9H); <sup>13</sup>C NMR (101 MHz, CDCl<sub>3</sub>) δ 139.7, 132.1, 131.8, 130.1, 129.4, 127.3, 120.5 (q, *J*<sub>C-F</sub> = 321.2 Hz), 73.8, 69.3, 58.4, 52.40, 52.36, 52.3;<sup>25</sup> <sup>19</sup>F NMR (376 MHz, CDCl<sub>3</sub>) δ -78.5; FTIR (NaCl/thin film) 1653, 1490, 1257, 1226, 1165, 1089, 1030; LRMS (APCI+) [M-OTf]<sup>+</sup> calculated for [C<sub>12</sub>H<sub>20</sub>NO]<sup>+</sup>: 194.2, found: 194.1.

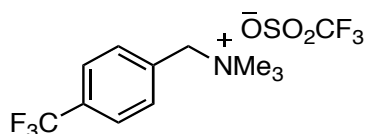

***N,N,N*-Trimethyl-1-(4-(trifluoromethyl)phenyl)methanaminium trifluoromethanesulfonate (S4).** Prepared according to the

General Procedure on 2.83 mmol scale to give salt **S4** (2.61 g, 97%) as a white solid (mp 158–161 °C): <sup>1</sup>H NMR (600 MHz, (CD)<sub>3</sub>CO) δ 7.99 (d, *J* = 8.1 Hz, 2H), 7.91 (d, *J* = 8.1 Hz, 2H), 4.93 (s, 2H), 3.41 (s, 9H); <sup>13</sup>C NMR (151 MHz, Acetone) δ 134.0, 132.6, 131.8 (q, *J*<sub>C-F</sub> = 33.2 Hz), 125.9 (q, *J*<sub>C-F</sub> = 4.5 Hz), 124.1 (q, *J*<sub>C-F</sub> = 271.8 Hz), 121.3 (q, *J*<sub>C-F</sub> = 321.6 Hz), 68.0, 52.4; <sup>19</sup>F NMR (565 MHz, (CD)<sub>3</sub>CO) δ -63.5, -78.9; FTIR (NaCl/thin film) 3042, 1698, 1482, 1424, 1277, 1262, 1165, 1107, 1035 cm<sup>-1</sup>; LRMS (APCI+) [M-OTf]<sup>+</sup> calculated for [C<sub>11</sub>H<sub>15</sub>F<sub>3</sub>NO]<sup>+</sup>: 218.1, found: 218.1.

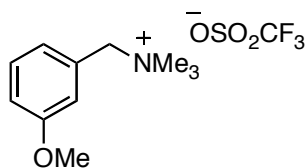

**1-(3-Methoxyphenyl)-*N,N,N*-trimethylmethanaminium trifluoromethanesulfonate (S5).** Prepared according to the General

Procedure on 3.50 mmol scale. In this case, a precipitate did not form upon addition of MeOTf. Instead, two distinct layers formed. The top layer was decanted off. The bottom layer was washed with Et<sub>2</sub>O (2 x 10 mL) and then dried under vacuum to give salt **S5** (1.13 g, 95%) as a light brown solid (mp 57–60 °C): <sup>1</sup>H NMR (600

<sup>25</sup> In several of the ammonium triflates, the methyl groups of the NMe<sub>3</sub> fragment appear as three, nearly coincident peaks. We hypothesize that this may be due to hindered rotation about the benzylic C–N bond.



MHz, CDCl<sub>3</sub>) δ 7.36 (d, *J* = 7.9 Hz, 1H), 7.13 – 7.06 (m, 2H), 7.06 – 6.99 (m, 1H), 4.58 (s, 2H), 3.84 (s, 3H), 3.20 (s, 9H); <sup>13</sup>C NMR (151 MHz, CDCl<sub>3</sub>) δ 160.2, 130.4, 128.4, 124.8, 120.7 (q, *J*<sub>C-F</sub> = 320.1 Hz), 118.1, 116.8, 69.6, 55.5, 52.6; <sup>19</sup>F NMR (565 MHz, CDCl<sub>3</sub>) δ –78.4; FTIR (NaCl/thin film) 3042, 2971, 2843, 1653, 1603, 1489, 1457, 1259, 1225, 1160, 1030 cm<sup>-1</sup>; LRMS (APCI+) [M–OTf]<sup>+</sup> calculated for [C<sub>11</sub>H<sub>18</sub>NO]<sup>+</sup>: 180.1, found: 180.1.

#### 1-(2-Methoxyphenyl)-*N,N,N*-trimethylmethanaminium

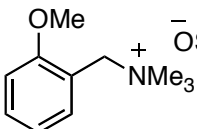

**trifluoromethanesulfonate (S6).** Prepared according to the General Procedure on 4.91 mmol scale. In this case, a precipitate did not form upon addition of MeOTf. Instead, two distinct layers formed. The top layer was decanted off. The bottom layer was washed with Et<sub>2</sub>O (2 x 10 mL) and then dried under vacuum to give salt **S6** (1.58 g, 98%) as a brown solid (mp 123–125 °C): <sup>1</sup>H NMR (600 MHz, CDCl<sub>3</sub>) δ 7.56 – 7.45 (m, 2H), 7.07 (t, *J* = 7.5 Hz, 1H), 7.02 (d, *J* = 8.2 Hz, 1H), 4.59 (s, 2H), 3.91 (s, 3H), 3.20 (s, 9H); <sup>13</sup>C NMR (151 MHz, CDCl<sub>3</sub>) δ 158.7, 135.1, 133.0, 121.4, 120.7 (q, *J*<sub>C-F</sub> = 320.1 Hz), 115.6, 111.6, 64.4, 55.7, 52.8; <sup>19</sup>F NMR (565 MHz, CDCl<sub>3</sub>) δ –78.4; FTIR (NaCl/thin film) 1653, 1636, 1489, 1473, 1255, 1159, 1030 cm<sup>-1</sup>; LRMS (APCI+) [M–OTf]<sup>+</sup> calculated for [C<sub>11</sub>H<sub>18</sub>NO]<sup>+</sup>: 180.1, found: 180.1.

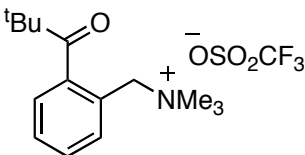

#### *N,N,N*-Trimethyl-1-(2-pivaloylphenyl)methanaminium

**trifluoromethanesulfonate (47).** Prepared according to the General Procedure on 7.06 mmol scale to give salt **47** (2.53 g, 96%) as a white solid (mp 117–120 °C): <sup>1</sup>H NMR (600 MHz, CDCl<sub>3</sub>) δ 7.79 (d, *J* = 5.9 Hz, 1H), 7.65 – 7.55 (m, 2H), 7.55 – 7.47 (m, 1H), 4.50 (s, 2H), 3.23 (s, 9H), 1.25 (s, 9H); <sup>13</sup>C NMR (151 MHz, CDCl<sub>3</sub>) δ 213.6, 141.8, 134.1, 130.3, 126.8, 124.2, 120.6 (q, *J*<sub>C-F</sub> = 320.1 Hz), 67.0, 53.8, 45.6, 27.6; <sup>13</sup>C NMR (101 MHz, (CD)<sub>3</sub>CO) δ 213.2, 142.5, 134.4, 130.3, 129.7, 126.8, 124.4, 121.3 (q, *J*<sub>C-F</sub> = 322.2 Hz), 66.7, 53.2, 53.21, 53.17,<sup>25</sup> 45.1, 26.8;<sup>26</sup> <sup>19</sup>F NMR (565 MHz, CDCl<sub>3</sub>) δ –78.5; FTIR (NaCl/thin film) 3042, 2973, 2873, 2253, 1684, 1653, 1488, 1475, 1254, 1224, 1154, 1029, 954 cm<sup>-1</sup>; LRMS (APCI+) [M–OTf]<sup>+</sup> calculated for [C<sub>15</sub>H<sub>24</sub>NO]<sup>+</sup>: 234.2, found: 234.2.

<sup>26</sup> Although two <sup>13</sup>C NMR peaks are coincident when CDCl<sub>3</sub> is used as solvent, all twelve <sup>13</sup>C NMR peaks are seen when (CD<sub>3</sub>)<sub>2</sub>CO is used as solvent.

### 1-(3,4-Difluorophenyl)-*N,N,N*-trimethylmethanaminium

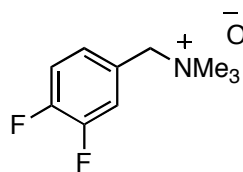

**trifluoromethanesulfonate (S7).** Prepared according to the General Procedure on 5.42 mmol scale to give salt **S7** (1.75 g, 96%) as a white solid (mp 119–122 °C): <sup>1</sup>H NMR (600 MHz, (CD<sub>3</sub>)<sub>2</sub>CO) δ 7.81 – 7.74 (m, 1H), 7.64 – 7.58 (m, 1H), 7.55 – 7.47 (m, 1H), 4.82 (s, 2H), 3.35 (s, 9H); <sup>13</sup>C NMR (151 MHz, (CD<sub>3</sub>)<sub>2</sub>CO) δ 151.7 (dd, *J*<sub>C-F</sub> = 237.1, 12.1 Hz), 150.0 (dd, *J*<sub>C-F</sub> = 235.6, 12.1 Hz), 130.5 (dd, *J*<sub>C-F</sub> = 6.0, 3.0 Hz), 125.7 (dd, *J*<sub>C-F</sub> = 6.0, 3.0 Hz), 122.2 (d, *J*<sub>C-F</sub> = 18.1 Hz), 121.3 (q, *J*<sub>C-F</sub> = 321.6 Hz), 118.1 (d, *J*<sub>C-F</sub> = 18.1 Hz), 67.5, 52.2; <sup>19</sup>F NMR (565 MHz, (CD<sub>3</sub>)<sub>2</sub>CO) δ –79.0, –137.0 (d, *J*<sub>F-F</sub> = 17.0 Hz), –138.3 (d, *J*<sub>F-F</sub> = 22.6 Hz); FTIR (NaCl/thin film) 3044, 2286, 2059, 1915, 1614, 1524, 1478, 1442, 1257, 1164, 1128, 1033, 959 cm<sup>-1</sup>; LRMS (APCI+) [M–OTf]<sup>+</sup> calculated for [C<sub>10</sub>H<sub>14</sub>F<sub>2</sub>N]<sup>+</sup>: 186.1, found: 186.1.

### *N,N,N*-Trimethyl-1-(naphthalen-2-yl)methanaminium

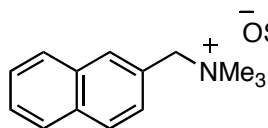

**trifluoromethanesulfonate (S8).** Prepared according to the General Procedure on 1.12 mmol scale to give salt **S8** (365 mg, 95%) as an off-white solid (mp 107–110 °C): <sup>1</sup>H NMR (600 MHz, CDCl<sub>3</sub>) δ 8.06 (s, 1H), 7.96 – 7.75 (m, 3H), 7.63 – 7.46 (m, 3H), 4.81 (s, 2H), 3.25 (s, 9H); <sup>13</sup>C NMR (151 MHz, CDCl<sub>3</sub>) δ 133.8, 133.5, 132.8, 129.1, 128.6, 128.5, 127.9, 127.7, 127.1, 124.4, 120.7 (q, *J*<sub>C-F</sub> = 320.1 Hz), 69.6, 52.5; <sup>19</sup>F NMR (565 MHz, CDCl<sub>3</sub>) δ –78.4; FTIR (NaCl/thin film) 3041, 1635, 1601, 1490, 1479, 1257, 1226, 1162, 1030 cm<sup>-1</sup>; LRMS (APCI+) [M–OTf]<sup>+</sup> calculated for [C<sub>14</sub>H<sub>18</sub>N]<sup>+</sup>: 200.1, found: 200.1.

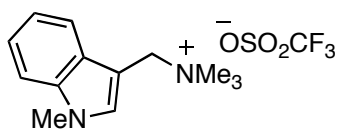

### *N,N,N*-Trimethyl-1-(1-methyl-1*H*-indol-3-yl)methanaminium

**trifluoromethanesulfonate (S9)** Prepared according to the General Procedure on 3.50 mmol scale to give salt **S9** (1.22 g, 97%) as a pale brown solid (mp 128–133 °C decomp): <sup>1</sup>H NMR (600 MHz, CDCl<sub>3</sub>) δ 7.69 (d, *J* = 8.0 Hz, 1H), 7.53 (s, 1H), 7.34 (d, *J* = 8.2 Hz, 1H), 7.32 – 7.27 (m, 1H), 7.24 (t, *J* = 7.4 Hz, 1H), 4.77 (s, 2H), 3.77 (s, 3H), 3.17 (s, 9H); <sup>13</sup>C NMR (151 MHz, CDCl<sub>3</sub>) δ 136.9, 134.1, 127.9, 122.6, 121.1, 120.8 (q, *J*<sub>C-F</sub> = 320.1 Hz), 118.6, 110.0, 100.5, 61.8, 51.9, 33.0; <sup>19</sup>F NMR (565 MHz, CDCl<sub>3</sub>) δ –78.4; FTIR (NaCl/thin film) 2085, 1642, 1547, 1482, 1267, 1033 cm<sup>-1</sup>; LRMS (APCI+) [M–OTf]<sup>+</sup> calculated for [C<sub>13</sub>H<sub>19</sub>N<sub>2</sub>]<sup>+</sup>: 203.2, found: 203.1.

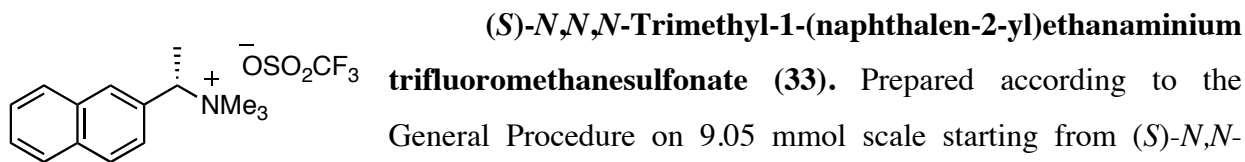

Prepared according to the General Procedure on 9.05 mmol scale starting from (*S*)-*N,N*-dimethyl-1-(naphthalen-2-yl)ethanamine, which was prepared using Eschweiler–Clarke conditions<sup>2</sup> from (*S*)-(-)-1-(2-naphthyl)ethylamine purchased in 99.6% ee. In this case, a precipitate did not form upon addition of MeOTf. Instead, two distinct layers formed. The top layer was decanted off. The bottom layer was washed with Et<sub>2</sub>O (2 x 10 mL) and then dried under vacuum to give salt **33** (3.25 g, 99%) as a light brown solid (mp 65–70 °C): <sup>1</sup>H NMR (600 MHz, CDCl<sub>3</sub>) δ 8.07 (s, 1H), 7.96 (d, *J* = 8.2 Hz, 2H), 7.90 (d, *J* = 7.7 Hz, 1H), 7.66 – 7.49 (m, 3H), 5.08 (q, *J* = 6.9 Hz, 1H), 3.23 (s, 9H), 1.95 (d, *J* = 7.1 Hz, 3H); <sup>13</sup>C NMR (151 MHz, CDCl<sub>3</sub>) δ 133.9, 132.8, 129.6, 129.2, 128.6, 127.9, 127.7, 127.2, 120.8 (q, *J*<sub>C-F</sub> = 320.1 Hz), 74.2, 51.2, 51.13, 51.10,<sup>25</sup> 15.0;<sup>27</sup> <sup>19</sup>F NMR (565 MHz, CDCl<sub>3</sub>) δ -78.4; FTIR (NaCl/thin film) 1642, 1479, 1252, 1029 cm<sup>-1</sup>; LRMS (APCI+) [M-OTf]<sup>+</sup> calculated for [C<sub>15</sub>H<sub>20</sub>N]<sup>+</sup>: 214.2, found: 214.1.

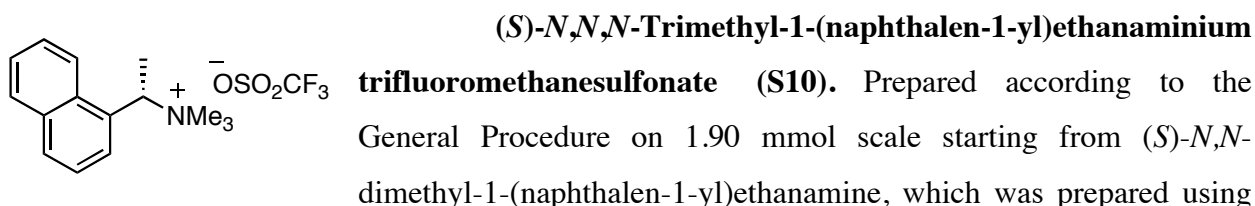

Prepared according to the General Procedure on 1.90 mmol scale starting from (*S*)-*N,N*-dimethyl-1-(naphthalen-1-yl)ethanamine, which was prepared using Eschweiler–Clarke conditions<sup>2</sup> from (*S*)-(-)-α-(1-naphthyl)ethylamine purchased in ≥99% ee. In this case, a precipitate did not form upon addition of MeOTf. Instead, two distinct layers formed. The top layer was decanted off. The bottom layer was washed with Et<sub>2</sub>O (2 x 10 mL) and then dried under vacuum to give salt **S10** (647 mg, 93%) as a brown solid (mp 56–63 °C): <sup>1</sup>H NMR (600 MHz, CDCl<sub>3</sub>) δ 8.45 (d, *J* = 8.7 Hz, 1H), 8.00 (d, *J* = 8.2 Hz, 1H), 7.93 (d, *J* = 8.2 Hz, 1H), 7.78 – 7.69 (m, 2H), 7.65 – 7.49 (m, 2H), 5.82 (q, *J* = 6.9 Hz, 1H), 3.20 (s, 9H), 1.97 (d, *J* = 6.9 Hz, 3H); <sup>13</sup>C NMR (151 MHz, CDCl<sub>3</sub>) δ 134.0, 132.4, 131.7, 129.4, 128.7, 128.4, 127.6, 126.8, 124.8, 122.7, 120.6 (q, *J*<sub>C-F</sub> = 320.1 Hz), 67.5, 51.39, 51.36, 51.3,<sup>25</sup> 16.1; <sup>19</sup>F NMR (565 MHz,

<sup>27</sup> Although this compound should have 16 distinct <sup>13</sup>C NMR signals, only 14 were observed in both CDCl<sub>3</sub> and (CD<sub>3</sub>)<sub>2</sub>CO. The <sup>1</sup>H, IR and LRMS confirm this structure.

CDCl<sub>3</sub>)  $\delta$  -78.4; FTIR (NaCl/thin film) 3054, 1635, 1599, 1515, 1489, 1416, 1392, 1252, 1225, 1160, 1029, 955 cm<sup>-1</sup>; LRMS (APCI+) [M-OTf]<sup>+</sup> calculated for [C<sub>15</sub>H<sub>20</sub>N]<sup>+</sup>: 214.2, found: 214.1.

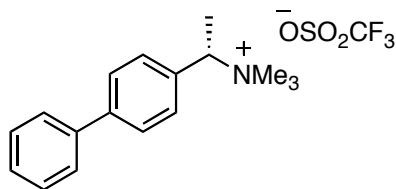

**(S)-1-(Biphenyl-4-yl)-N,N,N-trimethylethanaminium trifluoromethanesulfonate (S11).** Prepared according to the General Procedure on 2.32 mmol scale starting from (S)-1-(biphenyl-4-yl)-N,N-dimethylethanamine, which was prepared using Eschweiler-Clarke conditions<sup>2</sup> from (S)-(-)-1-(4-bromophenyl)ethylaniline (see preparation below) purchased in 98% ee, to give salt **S11** (846 mg, 94%) as an off-white solid (mp 195 °C decomp): <sup>1</sup>H NMR (600 MHz, (CD<sub>3</sub>)<sub>2</sub>CO)  $\delta$  7.84 (s, 4H), 7.74 (d, *J* = 7.7 Hz, 2H), 7.52 (t, *J* = 7.6 Hz, 2H), 7.44 (t, *J* = 7.5 Hz, 1H), 5.08 (q, *J* = 7.1 Hz, 1H), 3.33 (s, 9H), 2.00 (d, *J* = 6.9 Hz, 3H); <sup>13</sup>C NMR (151 MHz, (CD<sub>3</sub>)<sub>2</sub>CO)  $\delta$  142.9, 139.6, 132.3, 131.2, 129.0, 128.0, 127.4, 126.9, 121.5 (q, *J*<sub>C-F</sub> = 321.6 Hz), 73.7, 50.94, 50.92, 50.89,<sup>25</sup> 14.4; <sup>19</sup>F NMR (565 MHz, Acetone)  $\delta$  -78.9; FTIR (NaCl/thin film) 3032, 1488, 1457, 1419, 1256, 1227, 1030, 954, 841; LRMS (APCI+) [M-OTf]<sup>+</sup> calculated for [C<sub>17</sub>H<sub>22</sub>N]<sup>+</sup>: 240.2, found: 240.2.

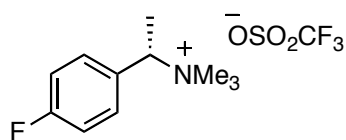

**(S)-1-(4-Fluorophenyl)-N,N,N-trimethylethanaminium trifluoromethanesulfonate (S12).** Prepared according to the General Procedure on 4.1 mmol scale starting from (S)-1-(4-fluorophenyl)-N,N-dimethylethanamine, which was prepared using Eschweiler-Clarke conditions<sup>2</sup> from (S)-1-(4-fluorophenyl)ethylaniline purchased in 99% ee, to give salt **S12** (1.31 g, 95%) as a light white solid (mp 75–78 °C): <sup>1</sup>H NMR (600 MHz, CDCl<sub>3</sub>)  $\delta$  7.57 (dd, *J* = 8.6, 5.1 Hz, 2H), 7.19 (t, *J* = 8.4 Hz, 2H), 4.94 (q, *J* = 7.0 Hz, 1H), 3.15 (s, 9H), 1.82 (d, *J* = 6.9 Hz, 3H); <sup>13</sup>C NMR (151 MHz, CDCl<sub>3</sub>)  $\delta$  163.9 (d, *J*<sub>C-F</sub> = 253.7 Hz), 163.1, 128.3 (d, *J*<sub>C-F</sub> = 3.0 Hz), 120.7 (q, *J*<sub>C-F</sub> = 320.1 Hz), 116.6, 116.5, 73.2, 51.0, 50.97, 50.94,<sup>25</sup> 15.1; <sup>19</sup>F NMR (565 MHz, CDCl<sub>3</sub>)  $\delta$  -78.5, -108.7; FTIR (NaCl/thin film) 2090, 1647, 1508, 1260, 1033 cm<sup>-1</sup>; LRMS (APCI+) [M-OTf]<sup>+</sup> calculated for [C<sub>11</sub>H<sub>17</sub>FN]<sup>+</sup>: 182.1, found: 182.1.

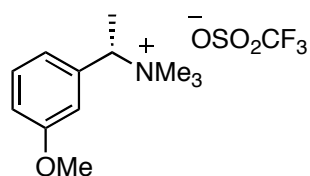

**(S)-1-(3-Methoxyphenyl)-*N,N,N*-trimethylethanaminium trifluoromethanesulfonate (S13).** Prepared according to the General Procedure on 2.91 mmol scale starting from (*S*)-1-(3-methoxyphenyl)-*N,N*-dimethylethamine, which was prepared using Eschweiler–Clarke

conditions<sup>2</sup> from (*S*)-(-)-1-(3-methoxyphenyl)ethylamine purchased in  $\geq 99\%$ , to give salt **S13** (947 mg, 95%) as a brown solid (mp 51–55 °C): <sup>1</sup>H NMR (600 MHz, CDCl<sub>3</sub>)  $\delta$  7.39 (t,  $J = 8.0$  Hz, 1H), 7.07 (d,  $J = 7.1$  Hz, 2H), 7.02 (d,  $J = 6.2$  Hz, 1H), 4.85 – 4.79 (m, 1H), 3.85 (s, 3H), 3.16 (s, 9H), 1.82 (d,  $J = 7.0$  Hz, 3H); <sup>13</sup>C NMR (151 MHz, CDCl<sub>3</sub>)  $\delta$  160.1, 133.8, 130.4, 120.5 (q,  $J_{\text{C-F}} = 320.1$  Hz), 116.3, 74.1, 55.6, 51.2, 51.19, 51.16,<sup>25</sup> 15.0;<sup>28</sup> <sup>19</sup>F NMR (565 MHz, CDCl<sub>3</sub>)  $\delta$  -78.5; FTIR (NaCl/thin film) 2081, 1636, 1491, 1261, 1168, 1032 cm<sup>-1</sup>; LRMS (APCI+) [M-OTf]<sup>+</sup> calculated for [C<sub>12</sub>H<sub>20</sub>NO]<sup>+</sup>: 194.2, found: 194.1.

### Cross Coupling of Aryl Bromide in Presence of Benzylic Dimethylamino Group: Preparation of 1-(Biphenyl-4-yl)-*N,N*-dimethylethamine<sup>29</sup>

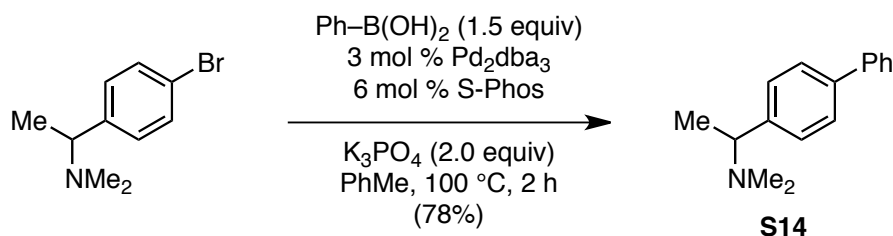

In a N<sub>2</sub>-atmosphere glovebox, Pd<sub>2</sub>dba<sub>3</sub> (3 mol %, 0.145 mmol, 132.4 mg), S-Phos (6 mol %, 0.289 mmol, 118.7 mg), K<sub>3</sub>PO<sub>4</sub> (2.0 equiv, 9.64 mmol, 2.20 g), PhB(OH)<sub>2</sub> (1.5 equiv, 7.23 mmol, 883 mg), and [1-(4-bromophenyl)ethyl]dimethylamine (1.0 equiv, 4.82 mmol, 1.10 g) were combined in a oven-dried Schlenk tube. The tube was sealed and then removed from the glovebox. Under positive N<sub>2</sub> pressure, PhMe (20 mL, 0.24 M) was added. The N<sub>2</sub>-inlet was removed, and the reaction mixture was heated at 100 °C for 2 h. The mixture was cooled to room temperature and filtered through a pad of Celite, which was then rinsed with Et<sub>2</sub>O (2 x 10 mL). The solution was concentrated. The crude material was purified by silica gel chromatography

<sup>28</sup> Although this compound should have 13 distinct <sup>13</sup>C NMR signals, only 11 were observed in both CDCl<sub>3</sub> and C<sub>6</sub>D<sub>6</sub>. The <sup>1</sup>H, IR and LRMS confirm this structure.

<sup>29</sup> This procedure is adapted from literature procedure. See: Barder, T. E.; Walker, S. D.; Martinelli, J. R.; Buchwald, S. L. *J. Am. Chem. Soc.* **2005**, *127*, 4685.

(20:2:1:78 acetone/CH<sub>2</sub>Cl<sub>2</sub>/Et<sub>3</sub>N/hexanes) to give compound **S14** (847 mg, 78%) as a colorless oil: <sup>1</sup>H NMR (400 MHz, CDCl<sub>3</sub>) δ 7.65–7.56 (m, 4H), 7.49–7.43 (m, 2H), 7.42–7.33 (m, 3H), 3.33 (q, *J* = 6.8 Hz, 1H), 2.26 (s, 6H), 1.44 (d, *J* = 6.4 Hz, 3H); <sup>13</sup>C NMR (101 MHz, CDCl<sub>3</sub>) δ 143.2, 141.0, 139.8, 128.8, 128.0, 127.13, 127.06, 127.0, 65.7, 43.3, 20.3. HRMS (EI+) [*M*]<sup>+</sup> calculated for C<sub>16</sub>H<sub>19</sub>N: 225.1518, found: 225.1521.

## Preparation and Activity of Alkylnickel(II) Triflate **48**

### Preparation of Alkylnickel(II) Triflate **48**

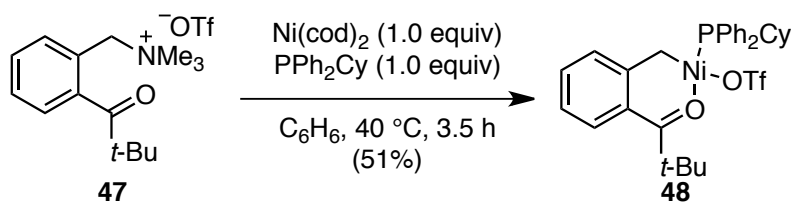

In a N<sub>2</sub>-atmosphere glovebox, Ni(cod)<sub>2</sub> (55 mg, 0.20 mmol, 1.0 equiv), PPh<sub>2</sub>Cy (59 mg, 0.20 mmol, 1.0 equiv), and benzene (0.2 M, 1.0 mL) were combined in a 1-dram vial. Ammonium triflate **47** (76 mg, 0.20 mmol, 1.0 equiv) was added. The vial was capped with a Teflon-lined cap and heated at 40 °C for 3.5 h. The vial was then cooled to room temperature. The reaction mixture was filtered through a Kimwipe plug to remove insoluble material. Pentane (5 mL) was added, and the solution was stored overnight at –35 °C. A purple precipitate formed. The supernatant was decanted off, and the obtained solid was washed with pentane (2 x 1 mL). The purple solid was recrystallized from benzene/pentane to give X-ray quality crystals (Fig S2) of compound **48** (66 mg, 51%) (mp 106 °C sinters; 120–125 °C dec. red film): <sup>1</sup>H NMR (600 MHz, C<sub>6</sub>D<sub>6</sub>) δ 7.75 (s, 4H), 7.36 (d, *J* = 7.8 Hz, 1H), 7.21 – 7.07 (m, 6H), 6.80 (t, *J* = 7.6 Hz, 1H), 6.69 (t, *J* = 7.5 Hz, 1H), 6.13 (d, *J* = 7.6 Hz, 1H), 2.02 (s, 2H), 1.49 (s, 2H), 1.44 – 1.31 (m, 6H), 1.19 (s, 9H), 0.82 – 0.62 (m, 3H); <sup>13</sup>C NMR (101 MHz, C<sub>6</sub>D<sub>6</sub>, 60 °C) δ 217.2, 145.6, 137.8, 134.2, 130.6, 129.4, 129.1, 128.7, 128.5, 128.3, 124.4, 44.7, 29.2, 28.0, 27.1, 23.2, 14.7, 14.0;<sup>30</sup> <sup>31</sup>P NMR (162.0 MHz, C<sub>6</sub>D<sub>6</sub>): δ 35.3; <sup>19</sup>F NMR (376.5 MHz, C<sub>6</sub>D<sub>6</sub>): δ –77.6.

<sup>30</sup> The quartet for the CF<sub>3</sub> group was not apparent in the <sup>13</sup>C NMR spectrum, despite long acquisition times and an extended relaxation delay. However, the <sup>19</sup>F NMR spectrum and crystal structure clearly indicate the presence of the triflate group.

**Figure S2.** Molecular diagram of **48** with ellipsoids at 30% probability. H-atoms omitted for clarity. (CCDC-899359)

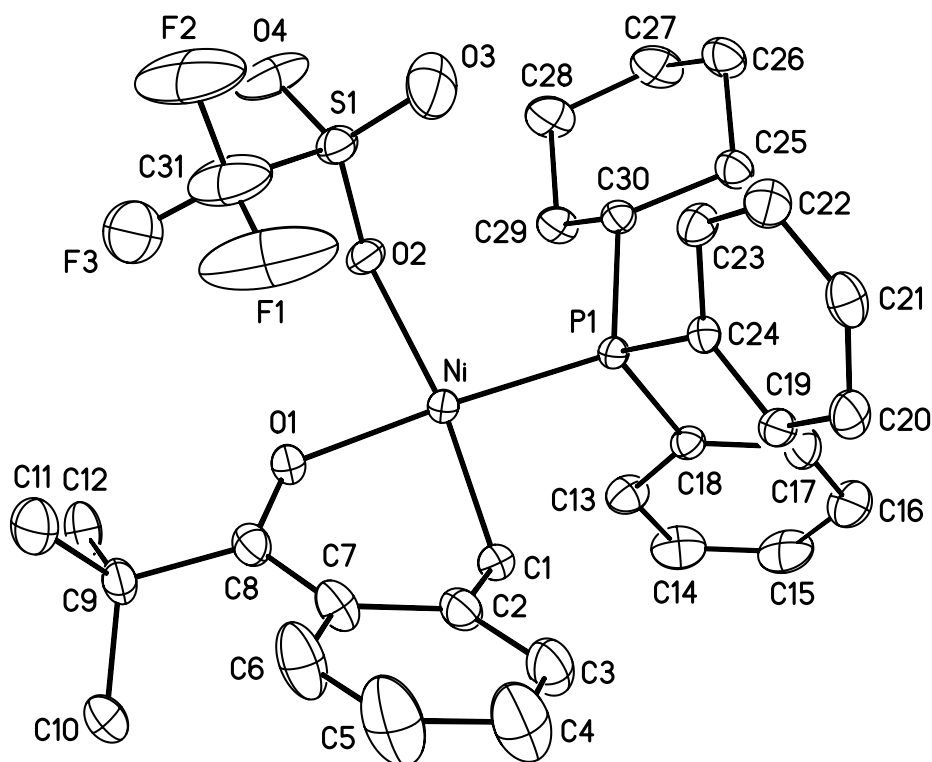

### Reaction of Alkylnickel(II) Triflate **48** with *p*-Tolylboronic Acid

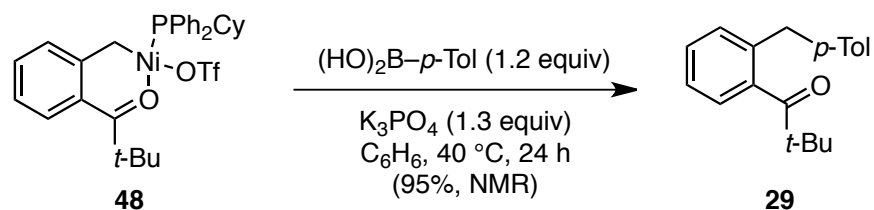

In a  $N_2$ -atmosphere glovebox, complex **48** (62 mg, 0.1 mmol, 1.0 equiv) *p*-tolylboronic acid (15 mg, 0.12 mmol, 1.2 equiv), and  $K_3PO_4$  (28 mg, 0.13 mmol, 1.3 equiv) were weighed into a 1-dram vial. Dioxane (0.3 mL, 0.33 M) was added. The vial was capped with a Teflon-lined cap and removed from the glovebox. The mixture was heated at 40 °C for 24 h. The reaction mixture was then diluted with  $Et_2O$  (1.0 mL) and filtered through a plug of silica gel, which was rinsed with  $Et_2O$  (5 mL). The filtrate was concentrated, and 1,3,5-trimethoxybenzene (16.7 mg,

0.10 mmol, 1.0 equiv) was added as an internal standard.  $^1\text{H}$  NMR analysis of the crude material showed 95% yield of diarylmethane **29**. The spectral data for this compound matches that reported above.

### Catalytic Activity of Alkylnickel(II) Triflate **48**

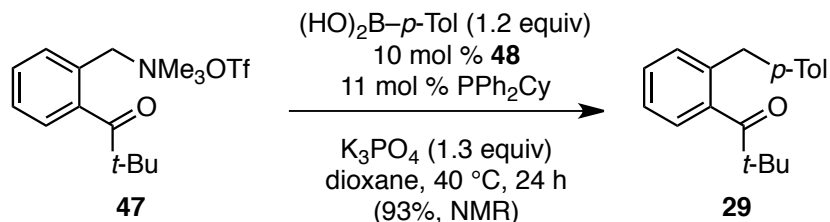

In a  $\text{N}_2$ -atmosphere glovebox, complex **48** (6.3 mg, 0.01 mmol, 10 mol %) *p*-tolylboronic acid (15 mg, 0.12 mmol, 1.2 equiv),  $\text{K}_3\text{PO}_4$  (28 mg, 0.13 mmol, 1.3 equiv) and  $\text{PPh}_2\text{Cy}$  (4 mg, 0.01 mmol, 11 mol %) were weighed into a 1-dram vial, followed by dioxane (0.3 mL, 0.33 M). The vial was capped with a Teflon-lined cap and removed from the glovebox. The mixture was heated at 40 °C for 24 h. The reaction mixture was then diluted with  $\text{Et}_2\text{O}$  (1.0 mL) and filtered through a plug of silica gel, which was rinsed with  $\text{Et}_2\text{O}$  (5 mL). The filtrate was concentrated, and 1,3,5-trimethoxybenzene (16.8 mg, 0.10 mmol, 1.0 equiv) was added as an internal standard.  $^1\text{H}$  NMR analysis of the crude material showed 98% yield of diarylmethane **29**. The reaction of complex **48** was included in the calculation of the maximum theoretical yield. Thus, 1.1 equiv of product **29** are possible in this reaction. The spectral data for this compound matches that reported above.



Compound 2, <sup>1</sup>H NMR

- 7.379
- 7.375
- 7.360
- 7.353
- 7.342
- 7.284
- 7.278
- 7.270
- 7.258
- 7.197
- 7.189
- 7.174
- 7.160
- 7.152

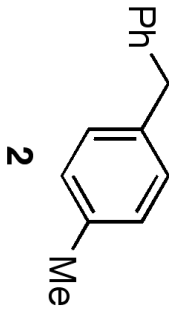

4.028

2.399

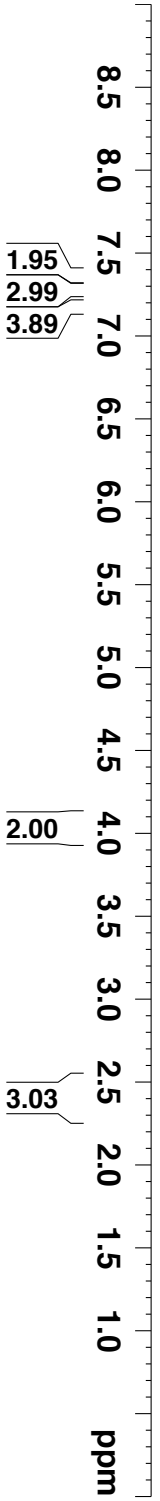

Current Data Parameters  
 NAME PM-3-291-1-1H  
 EXPNO 1  
 PROCNO 1

F2 - Acquisition Parameters  
 Date\_ 20120711  
 Time\_ 12.17  
 INSTRUM spect  
 PROBHD 5 mm CPQNP 1H/  
 PULPROG zg30  
 TD 65536  
 SOLVENT CDCl3  
 NS 16  
 DS 2  
 SWH 8278.146 Hz  
 FIDRES 0.126314 Hz  
 AO 3.9584243 sec  
 RG 14.3  
 DW 60.400 usec  
 DE 6.00 usec  
 TE 298.1 K  
 D1 1.00000000 sec  
 TD0 1

==== CHANNEL f1 =====  
 NUC1 1H  
 P1 15.00 usec  
 PL1 4.90 dB  
 PL1W 3.30822015 W  
 SFO1 400.1324710 MHz

F2 - Processing parameters  
 SI 32768  
 SF 400.1300000 MHz  
 WDW EM  
 SSB 0  
 LB 0.30 Hz  
 GB 0  
 PC 1.00

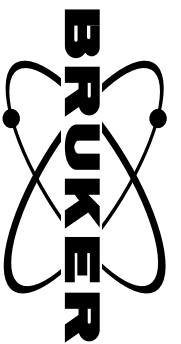

Compound 2, <sup>13</sup>CNMR

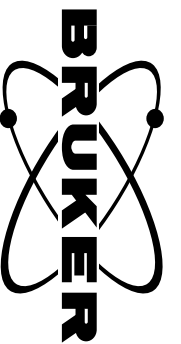

141.49  
138.15  
135.61  
129.23  
128.95  
128.89  
128.51  
126.06

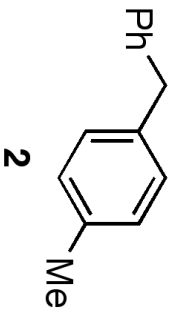

41.59  
21.11

Current Data Parameters  
NAME PM-3-291-1-13C  
EXPNO 1  
PROCNO 1

F2 - Acquisition Parameters  
Date\_ 20120711  
Time 12.20

INSTRUM spect  
PROBHD 5 mm CPQNP 1H/  
PULPROG zgpg30  
TD 65536  
SOLVENT CDC13  
NS 32  
DS 4  
SWH 23980.814 Hz  
FIDRES 0.365918 Hz  
AQ 1.3664756 sec  
RG 512  
DW 20.850 usec  
DE 18.00 usec  
TE 298.2 K  
D1 2.00000000 sec  
D11 0.03000000 sec  
TD0 1

==== CHANNEL f1 =====  
NUC1 13C  
P1 9.25 usec  
PL1 0.55 dB  
PL1W 35.18820572 W  
SFO1 100.6228298 MHz

==== CHANNEL f2 =====  
CPDPRG2 waltz16  
NUC2 1H  
PCPD2 90.00 usec  
PL2 4.90 dB  
PL12 20.46 dB  
PL13 21.00 dB  
PL12W 3.30822015 W  
PL12W 0.09195905 W  
PL13W 0.08120718 W  
SFO2 400.1316005 MHz

F2 - Processing parameters  
SI 32768  
SF 100.6127690 MHz  
WDW EM  
SSB 0  
LB 1.00 Hz  
GB 0  
PC 1.40

170 160 150 140 130 120 110 100 90 80 70 60 50 40 30 20 ppm

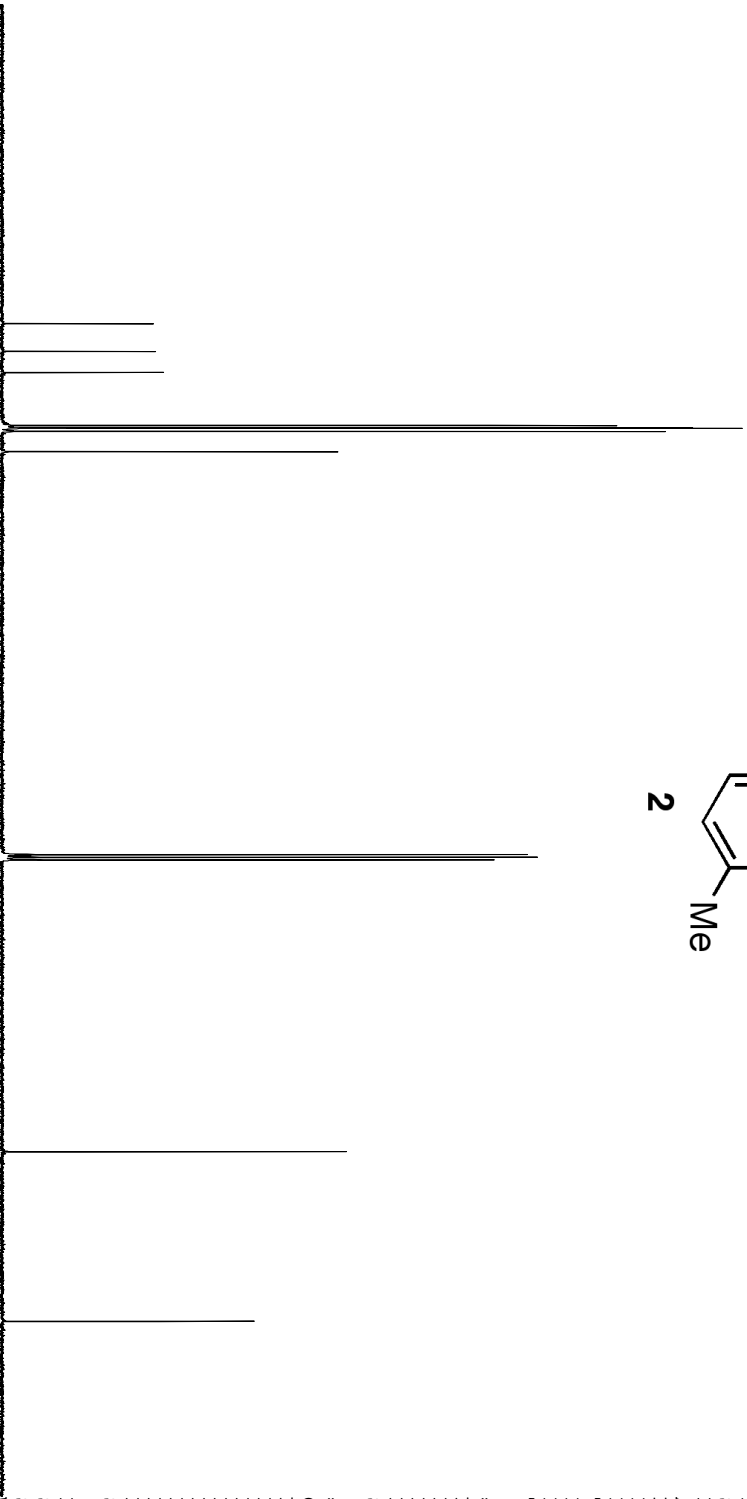

Compound 3, <sup>1</sup>H NMR

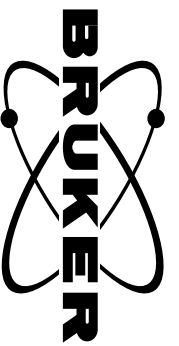

Current Data Parameters  
 NAME DM3-077-1-2  
 EXPNO 1  
 PROCNO 1

F2 - Acquisition Parameters  
 Date\_ 20120522  
 Time\_ 17.47

INSTRUM spect  
 PROBHD 5 mm CPQNP 1H/  
 PULPROG zg30  
 TD 65536  
 SOLVENT CDCl3  
 NS 16  
 DS 2  
 SWH 8278.146 Hz  
 FIDRES 0.126314 Hz  
 AQ 3.9584243 sec  
 RG 12.7  
 DW 60.400 usec  
 DE 6.00 usec  
 TE 298.1 K  
 D1 1.00000000 sec  
 TD0 1

==== CHANNEL f1 =====  
 NUC1 1H  
 P1 15.00 usec  
 PL1 4.90 dB  
 PL1W 3.30822015 W  
 SFO1 400.1324710 MHz

F2 - Processing parameters  
 SI 32768  
 SF 400.1300000 MHz  
 WDW EM  
 SSB 0  
 LB 0.30 Hz  
 GB 0  
 PC 1.00

- 7.349
- 7.345
- 7.332
- 7.330
- 7.319
- 7.311
- 7.283
- 7.257
- 7.245
- 7.240
- 7.225

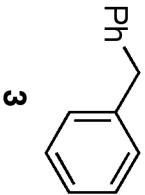

4.030

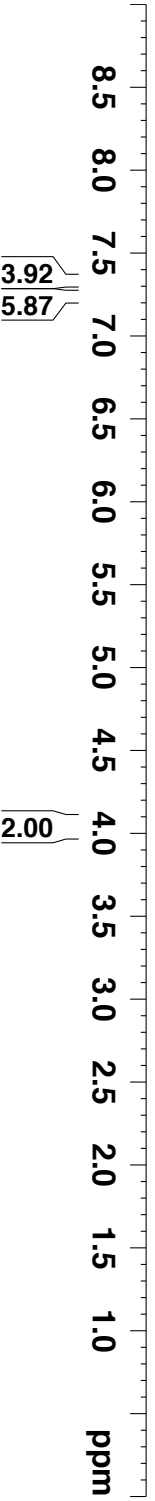

Compound 3, <sup>13</sup>CNMR

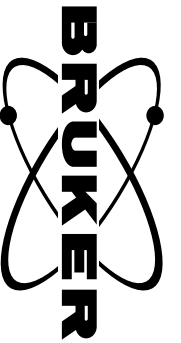

141.15  
128.97  
128.50  
126.10

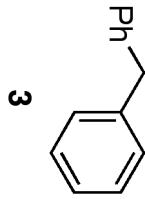

41.97

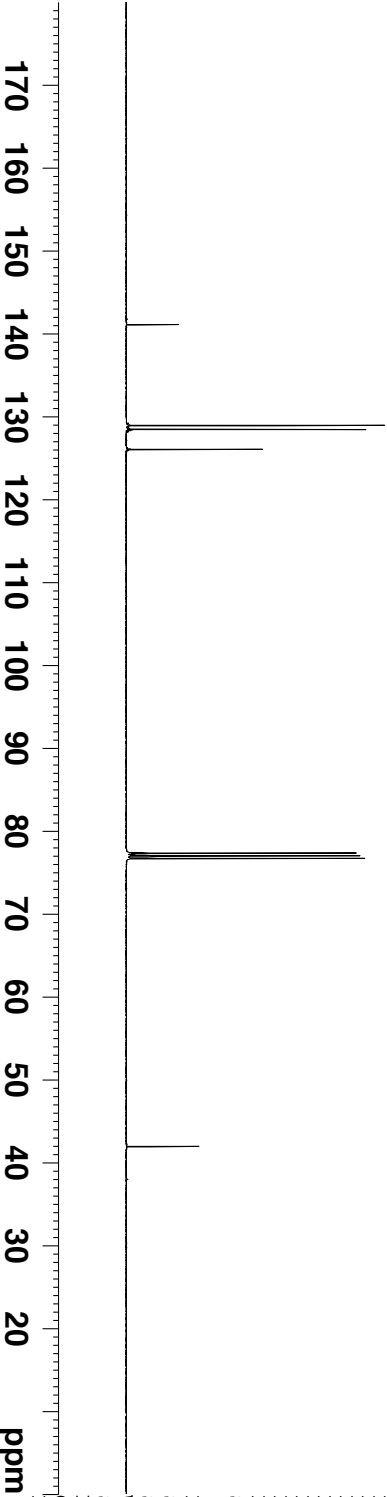

Current Data Parameters  
NAME DMM3-077-1-2  
EXPNO 2  
PROCNO 1

F2 - Acquisition Parameters  
Date\_ 20120522  
Time\_ 23.05  
INSTRUM spect  
PROBHD 5 mm CPQNP 1H/  
PULPROG zgpg30  
TD 65536  
SOLVENT CDC13  
NS 256  
DS 4  
SWH 23980.814 Hz  
FIDRES 0.365918 Hz  
AQ 1.3664756 sec  
RG 512  
DW 20.850 usec  
DE 18.00 usec  
TE 298.2 K  
D1 2.00000000 sec  
D11 0.03000000 sec  
TD0 1

==== CHANNEL f1 =====  
NUC1 13C  
P1 9.25 usec  
PL1 0.55 dB  
PL1W 35.18820572 W  
SFO1 100.6228298 MHz

==== CHANNEL f2 =====  
CPDPRG2 waltz16  
NUC2 1H  
PCPD2 90.00 usec  
PL2 4.90 dB  
PL12 20.46 dB  
PL13 21.00 dB  
PL12W 3.30822015 W  
PL12W 0.09195905 W  
PL13W 0.08120718 W  
SFO2 400.1316005 MHz

F2 - Processing parameters  
SI 32768  
SF 100.6127690 MHz  
WDW EM  
SSB 0  
LB 1.00 Hz  
GB 0  
PC 1.40

Compound 4, <sup>1</sup>H NMR

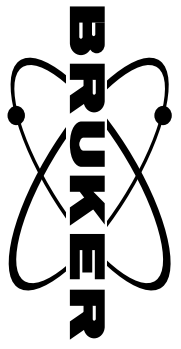

7.351  
7.332  
7.318  
7.314  
7.284  
7.259  
7.257  
7.241  
7.237  
7.220  
7.171  
7.149  
6.895  
6.890  
6.878  
6.873

3.979  
3.828

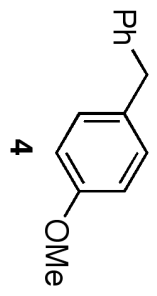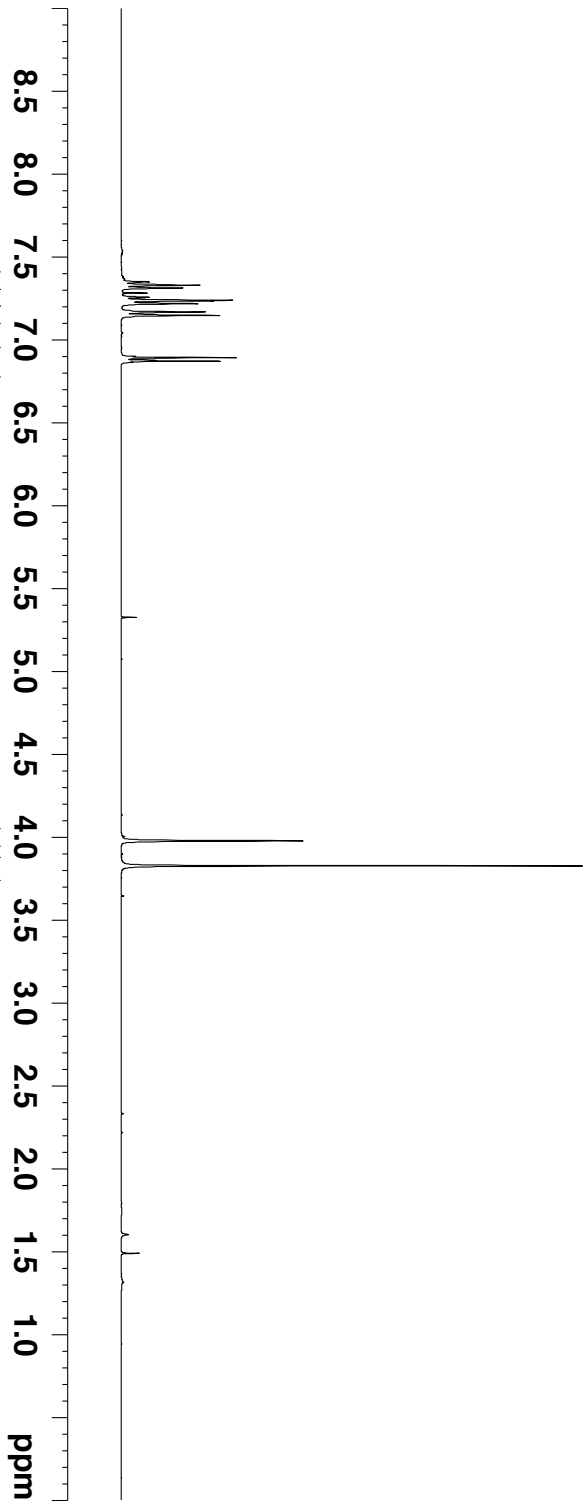

Current Data Parameters  
NAME DM3-104-1  
EXPNO 1  
PROCNO 1

F2 - Acquisition Parameters  
Date\_ 20120706  
Time\_ 16.35  
INSTRUM spect  
PROBHD 5 mm CPQNP 1H/  
PULPROG zg30  
TD 65536  
SOLVENT CDCl3  
NS 16  
DS 2  
SWH 8278.146 Hz  
FIDRES 0.126314 Hz  
AQ 3.9584243 sec  
RG 10.1  
DW 60.400 usec  
DE 6.00 usec  
TE 298.1 K  
D1 1.00000000 sec  
TD0 1

==== CHANNEL f1 =====  
NUC1 1H  
P1 15.00 usec  
PL1 4.90 dB  
PL1W 3.30822015 W  
SFO1 400.1324710 MHz

F2 - Processing parameters  
SI 32768  
SF 400.1300000 MHz  
WDW EM  
SSB 0  
LB 0.30 Hz  
GB 0  
PC 1.00

Compound 4, <sup>13</sup>CNMR

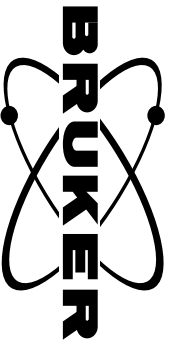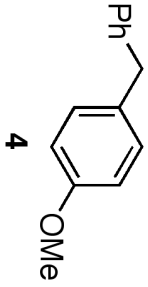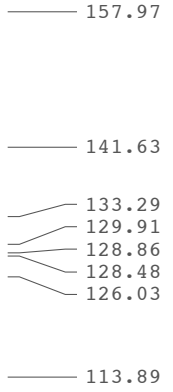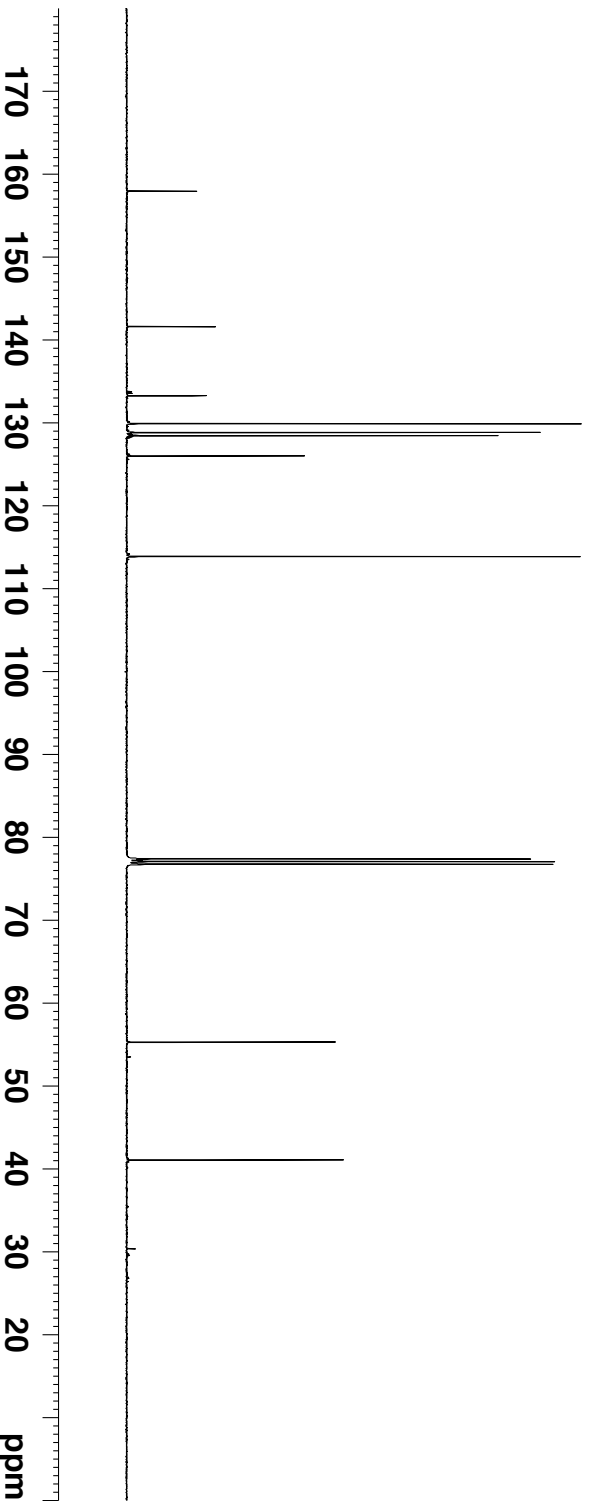

Current Data Parameters  
 NAME DM3-104-1  
 EXPNO 2  
 PROCNO 1

F2 - Acquisition Parameters  
 Date\_ 20120706  
 Time\_ 16.51  
 INSTRUM spect  
 PROBD 5 mm CPQNP 1H/  
 PULPROG zgpg30  
 TD 65536  
 SOLVENT CDC13  
 NS 256  
 DS 4  
 SWH 23980.814 Hz  
 FIDRES 0.365918 Hz  
 AQ 1.3664756 sec  
 RG 512  
 DW 20.850 usec  
 DE 18.00 usec  
 TE 298.2 K  
 D1 2.00000000 sec  
 D11 0.03000000 sec  
 TD0 1

==== CHANNEL F1 =====  
 NUC1 13C  
 P1 9.25 usec  
 PL1 0.55 dB  
 PL1W 35.18820572 W  
 SFO1 100.6228298 MHz

==== CHANNEL F2 =====  
 CPDPRG2 waltz16  
 NUC2 1H  
 PCPD2 90.00 usec  
 PL2 4.90 dB  
 PL12 20.46 dB  
 PL13 21.00 dB  
 PL12W 3.30822015 W  
 PL12W 0.09195905 W  
 PL13W 0.08120718 W  
 SFO2 400.1316005 MHz

F2 - Processing parameters  
 SI 32768  
 SF 100.6127690 MHz  
 WDW EM  
 SSB 0  
 LB 1.00 Hz  
 GB 0  
 PC 1.40

Compound 5, <sup>1</sup>H NMR

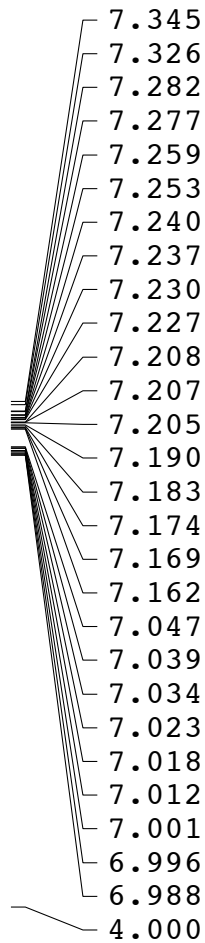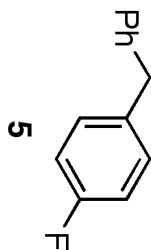

Current Data Parameters  
NAME DM3-077-3  
EXPNO 1  
PROCNO 1

F2 - Acquisition Parameters  
Date\_ 20120522  
Time 21.40  
INSTRUM spect  
PROBHD 5 mm CPQNP 1H/  
PULPROG zg30  
TD 65536  
SOLVENT CDCl3  
NS 16  
DS 2  
SWH 8278.146 Hz  
FIDRES 0.126314 Hz  
AQ 3.9584243 sec  
RG 28.5  
DW 60.400 usec  
DE 6.00 usec  
TE 298.2 K  
D1 1.00000000 sec  
TD0 1

==== CHANNEL f1 =====  
NUC1 1H  
P1 15.00 usec  
PL1 4.90 dB  
PL1W 3.30822015 W  
SF01 400.1324710 MHz  
  
F2 - Processing parameters  
SI 32768  
SF 400.1300000 MHz  
WDW EM  
SSB 0  
LB 0.30 Hz  
GB 0  
PC 1.00

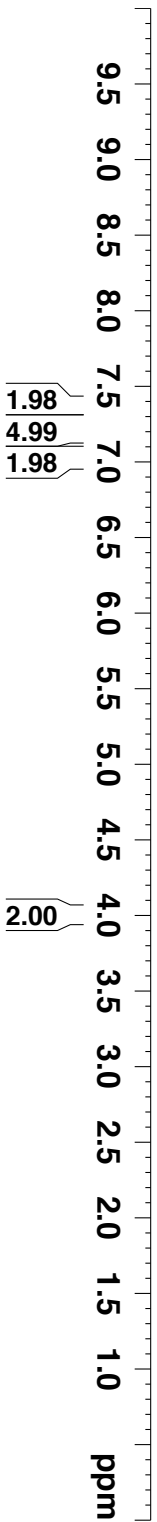

Compound 5, <sup>13</sup>CNMR

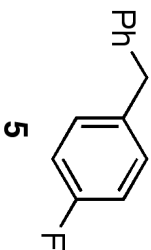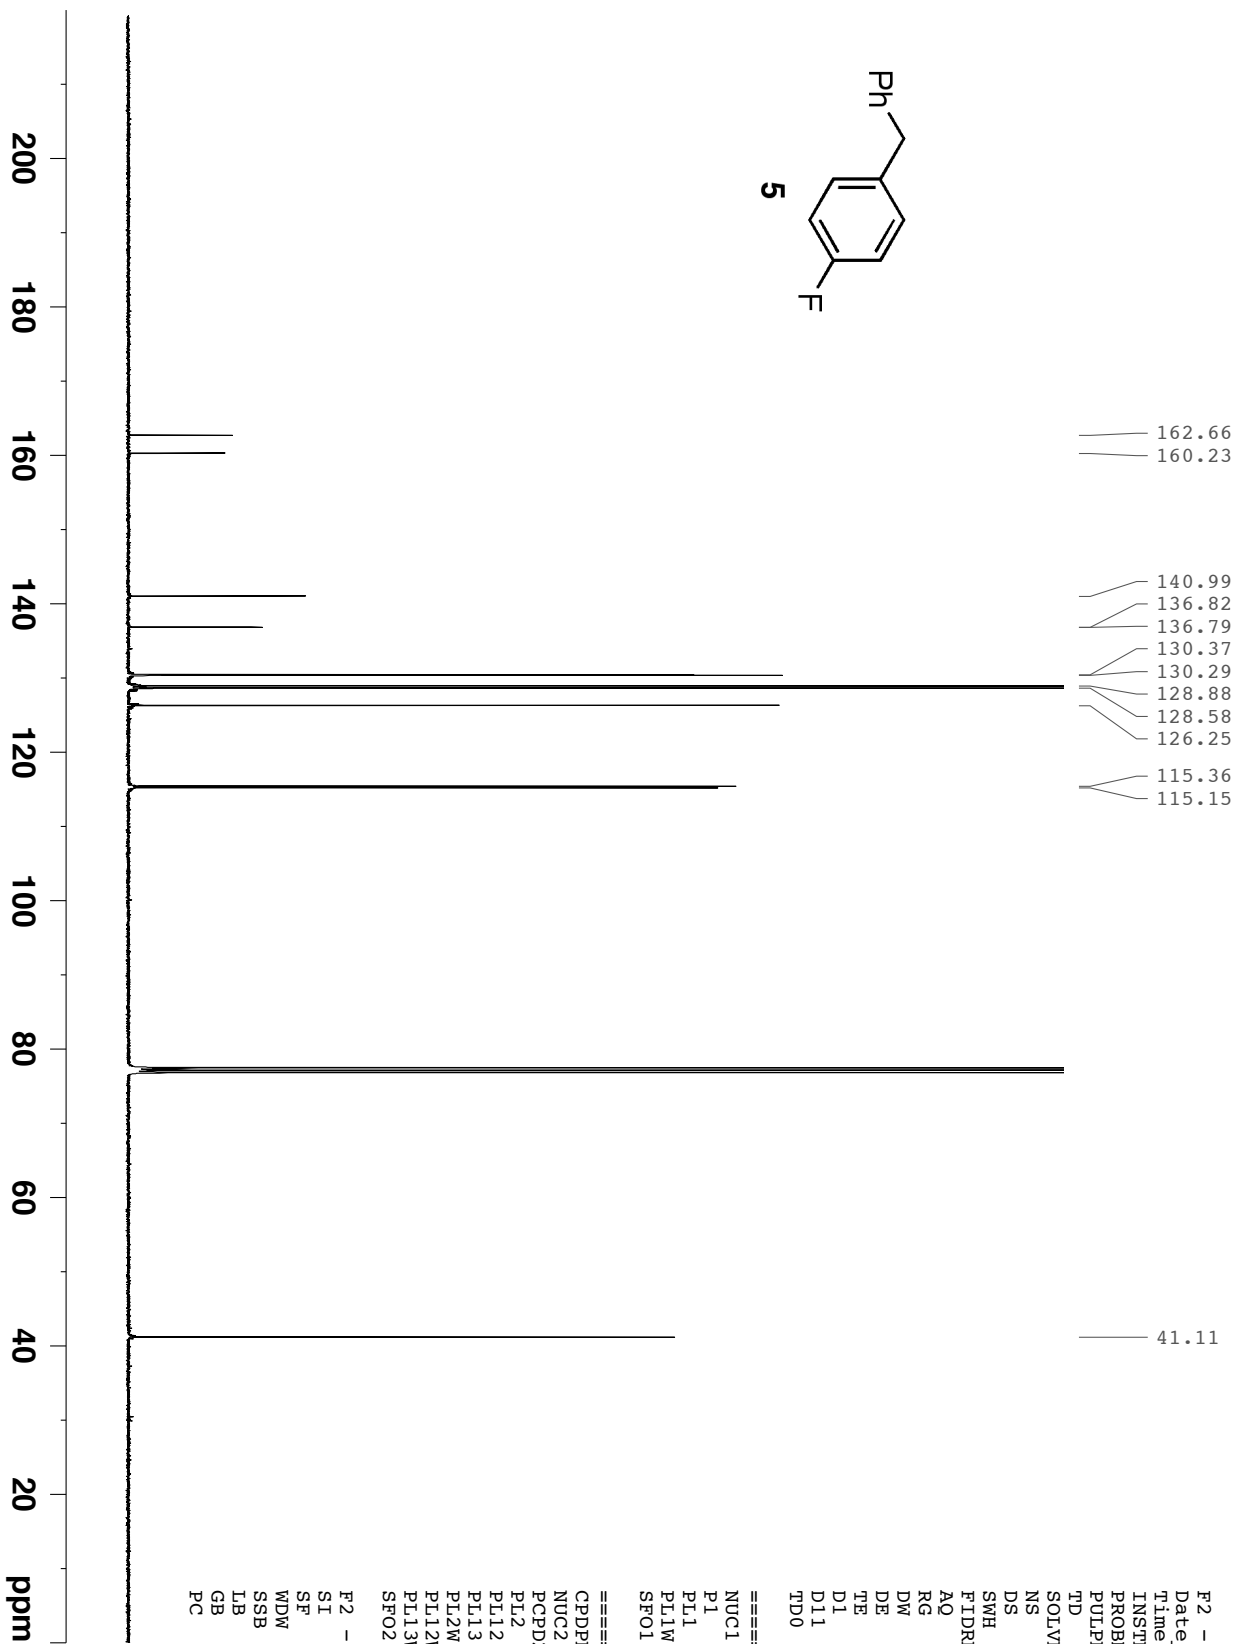

Current Data Parameters  
 NAME DM3-077-3  
 EXPNO 2  
 PROCNO 1

F2 - Acquisition Parameters  
 Date\_ 20120522  
 Time 21.37  
 INSTRUM spect  
 PROBHD 5 mm CPQNP 1H/  
 PULPROG zgpg30  
 TD 65536  
 SOLVENT CDCl3  
 NS 256  
 DS 4  
 SWH 23980.814 Hz  
 FIDRES 0.365918 Hz  
 AQ 1.3664756 sec  
 RG 512  
 DW 20.850 usec  
 DE 18.00 usec  
 TE 298.1 K  
 D1 2.00000000 sec  
 D11 0.03000000 sec  
 TD0 1

==== CHANNEL f1 =====  
 NUC1 13C  
 P1 9.25 usec  
 PL1 0.55 dB  
 PL1W 35.18820572 W  
 SFO1 100.6228298 MHz

==== CHANNEL f2 =====  
 CPDPRG2 waltz16  
 NUC2 1H  
 PCPD2 90.00 usec  
 PL2 4.90 dB  
 PL12 20.46 dB  
 PL13 21.00 dB  
 PL2W 3.30822015 W  
 PL12W 0.09195905 W  
 PL13W 0.08120718 W  
 SFO2 400.1316005 MHz

F2 - Processing parameters  
 SI 32768  
 SF 100.6127690 MHz  
 WDW EM  
 SSB 0  
 LB 1.00 Hz  
 GB 0  
 PC 1.40



Compound 6, <sup>1</sup>H NMR

- 8.015
- 8.011
- 7.998
- 7.994
- 7.339
- 7.320
- 7.306
- 7.285
- 7.277
- 7.259
- 7.227
- 7.224
- 7.206

- 4.066
- 3.932

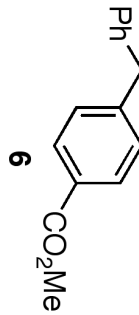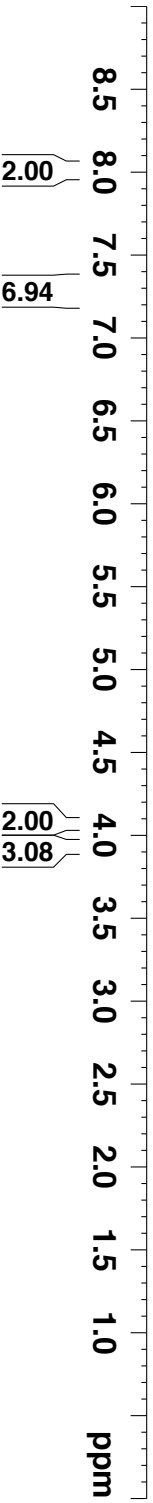

Current Data Parameters  
 NAME PM-3-Ester-2  
 EXPNO 1  
 PROCNO 1

F2 - Acquisition Parameters  
 Date\_ 20120717  
 Time 12.14  
 INSTRUM spect  
 PROBHD 5 mm CPQNP 1H/  
 PULPROG zg30  
 TD 65536  
 SOLVENT CDCl3  
 NS 16  
 DS 2  
 SWH 8278.146 Hz  
 FIDRES 0.126314 Hz  
 AQ 3.9584243 sec  
 RG 11.3  
 DW 60.400 usec  
 DE 6.00 usec  
 TE 298.2 K  
 D1 1.00000000 sec  
 TD0 1

==== CHANNEL f1 =====  
 NUC1 1H  
 P1 15.00 usec  
 PL1 4.90 dB  
 PL1W 3.30822015 W  
 SFO1 400.1324710 MHz

F2 - Processing parameters  
 SI 32768  
 SF 400.1300000 MHz  
 WDW EM  
 SSB 0  
 LB 0.30 Hz  
 GB 0  
 PC 1.00

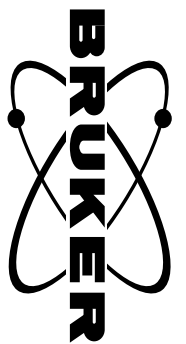

Compound 6, <sup>13</sup>CNMR

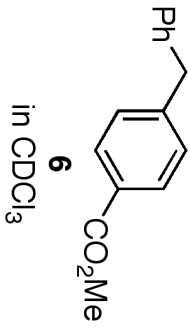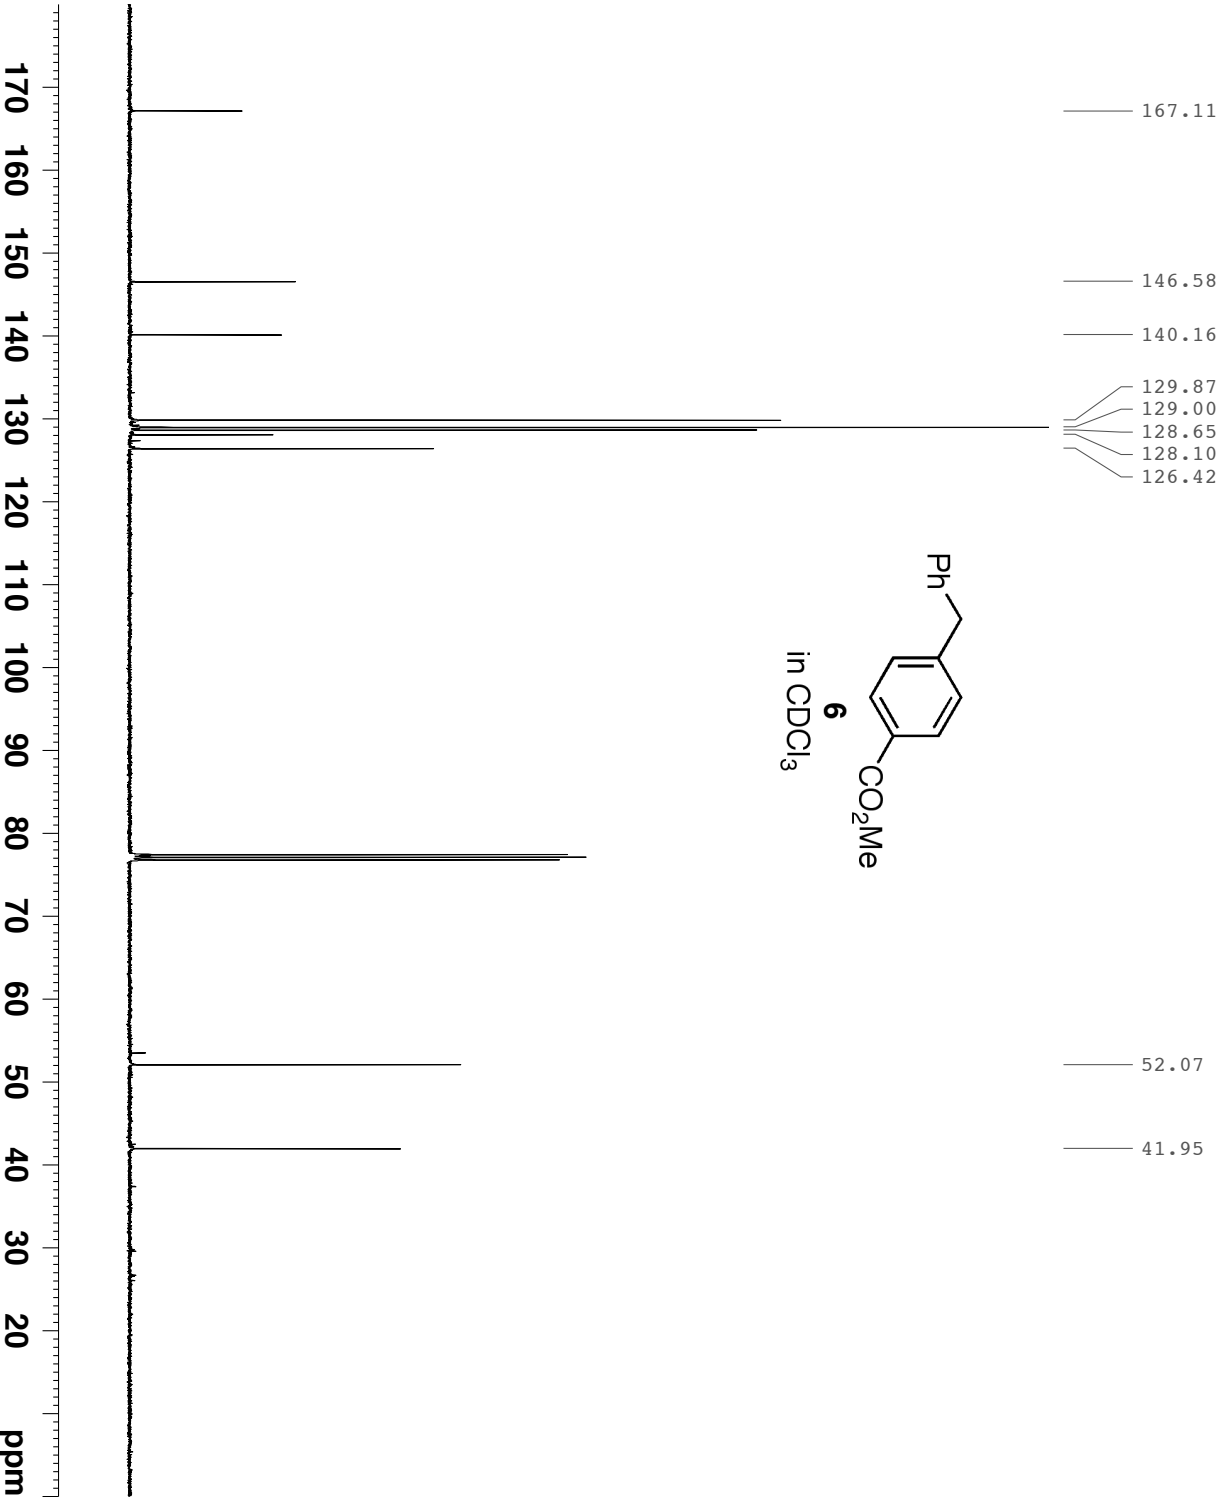

Current Data Parameters  
 NAME PM-3-Ester-2  
 EXPNO 2  
 PROCNO 1

F2 - Acquisition Parameters  
 Date\_ 20120717  
 Time\_ 12.17

INSTRUM spect  
 PROBD 5 mm CPQNP 1H/  
 PULPROG zgpg30  
 TD 65536  
 SOLVENT CDCl3  
 NS 32  
 DS 4  
 SWH 23980.814 Hz  
 FIDRES 0.365918 Hz  
 AQ 1.3664756 sec  
 RG 512  
 DW 20.850 usec  
 DE 18.00 usec  
 TE 298.2 K  
 D1 2.00000000 sec  
 D11 0.03000000 sec  
 TD0 1

==== CHANNEL F1 =====  
 NUC1 13C  
 P1 9.25 usec  
 PL1 0.55 dB  
 PL1W 35.18820572 W  
 SFO1 100.6228298 MHz

==== CHANNEL F2 =====  
 CPDPRG2 waltz16  
 NUC2 1H  
 PCPD2 90.00 usec  
 PL2 4.90 dB  
 PL12 20.46 dB  
 PL13 21.00 dB  
 PL12W 3.30822015 W  
 PL12W 0.09195905 W  
 PL13W 0.08120718 W  
 SFO2 400.1316005 MHz

F2 - Processing parameters  
 SI 32768  
 SF 100.6127690 MHz  
 WDM EM  
 SSB 0  
 LB 1.00 Hz  
 GB 0  
 PC 1.40

Compound 6, <sup>13</sup>CNMR in Acetone-D

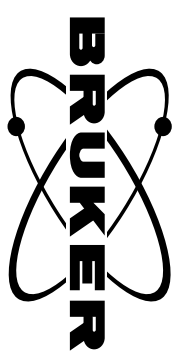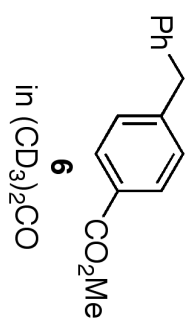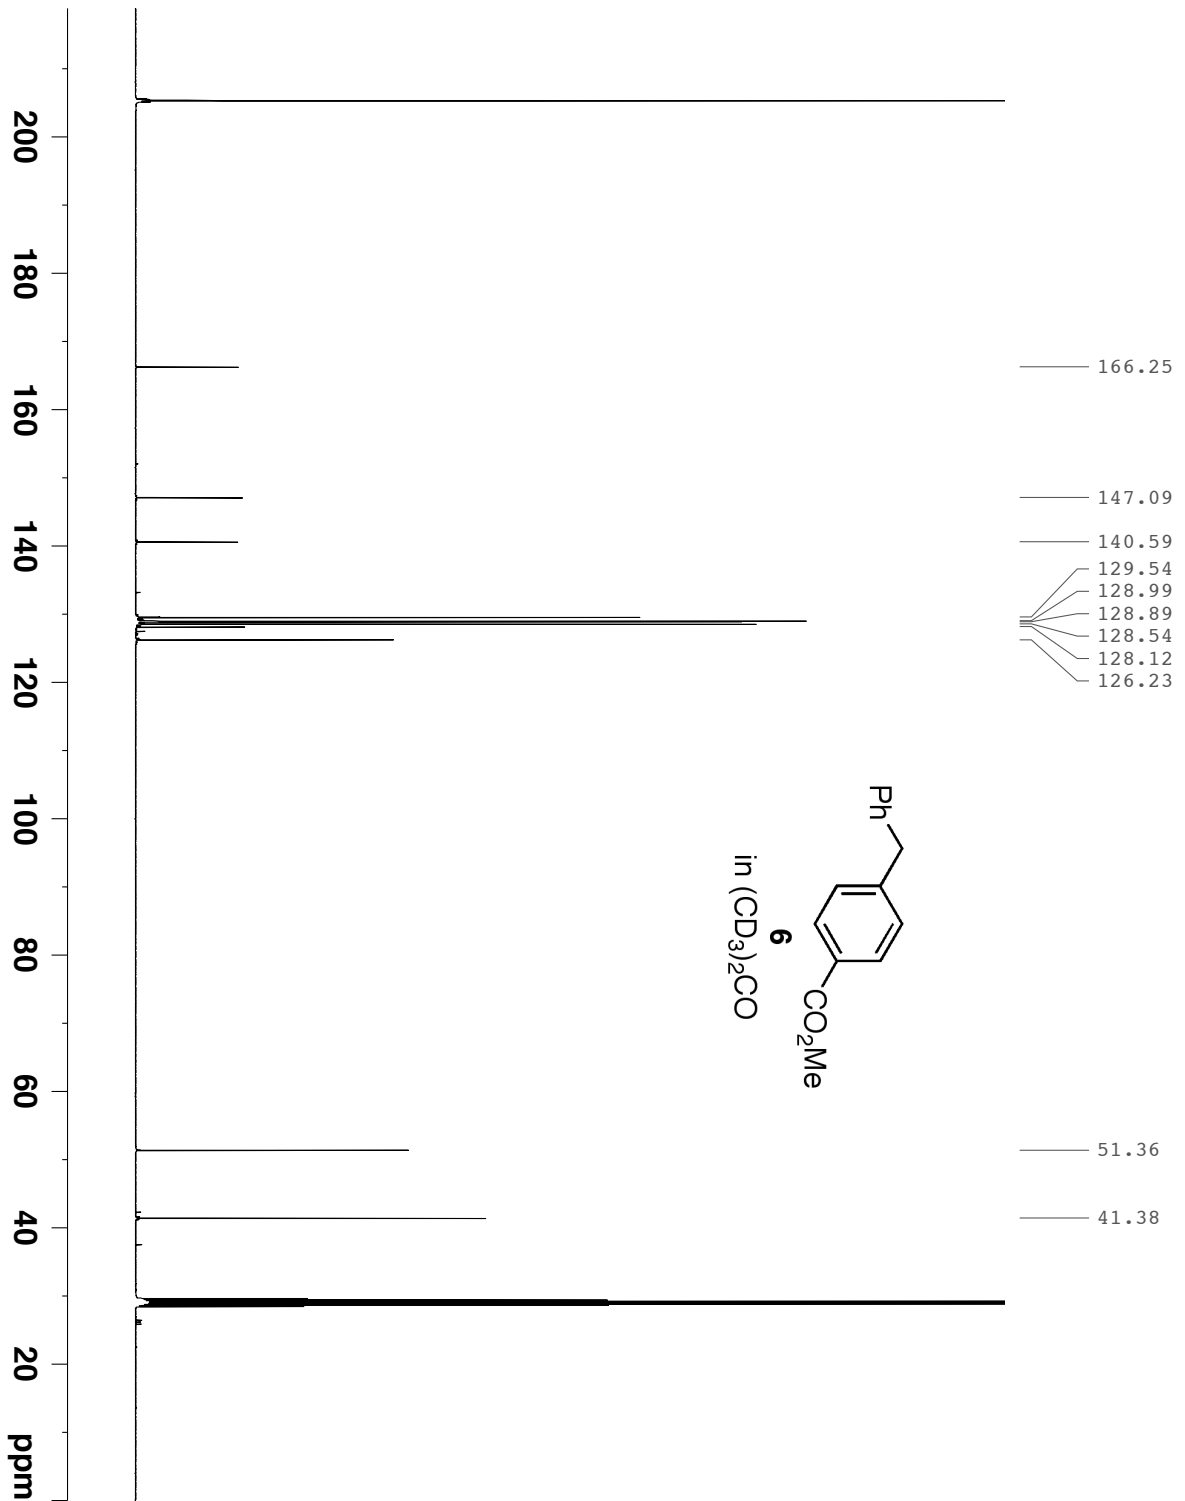

166.25  
 147.09  
 140.59  
 129.54  
 128.99  
 128.89  
 128.54  
 128.12  
 126.23

51.36  
 41.38

Current Data Parameters  
 NAME PM-4-Methyl ester-rerun  
 EXPNO 1  
 PROCNO 1

F2 - Acquisition Parameters  
 Date\_ 20120816  
 Time\_ 2.30  
 INSTRUM spect  
 PROBHD 5 mm CPQNP 1H/  
 PULPROG zgpg30  
 TD 65536  
 SOLVENT Acetone  
 NS 1024  
 DS 4  
 SWH 23980.814 Hz  
 FIDRES 0.365918 Hz  
 AQ 1.3664756 sec  
 RG 512  
 DW 20.850 usec  
 DE 18.00 usec  
 TE 298.2 K  
 D1 2.00000000 sec  
 D11 0.03000000 sec  
 TD0 1

===== CHANNEL f1 =====  
 NUC1 13C  
 P1 9.25 usec  
 PL1 0.55 dB  
 PL1W 35.18820572 W  
 SFO1 100.6228298 MHz

===== CHANNEL f2 =====  
 CPDPRG2 waltz16  
 NUC2 1H  
 PCPD2 90.00 usec  
 PL2 4.90 dB  
 PL12 20.46 dB  
 PL13 21.00 dB  
 PL2W 3.30822015 W  
 PL12W 0.09195905 W  
 PL13W 0.08120718 W  
 SFO2 400.1316005 MHz

F2 - Processing parameters  
 SI 32768  
 SF 100.6127690 MHz  
 WDM EM  
 SSB 0  
 LB 1.00 Hz  
 GB 0  
 PC 1.40

Compound 7, <sup>1</sup>H NMR

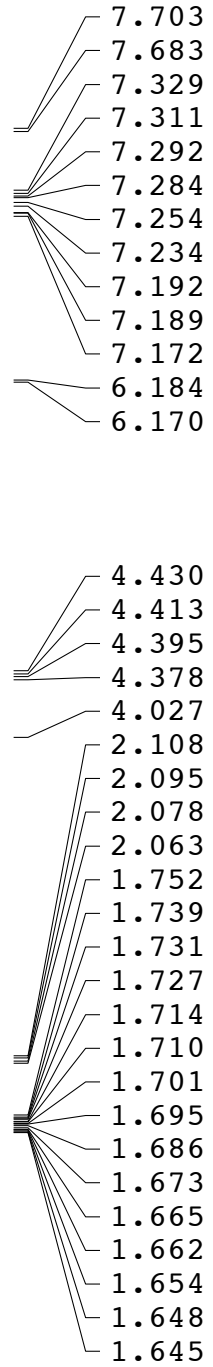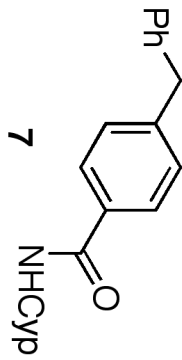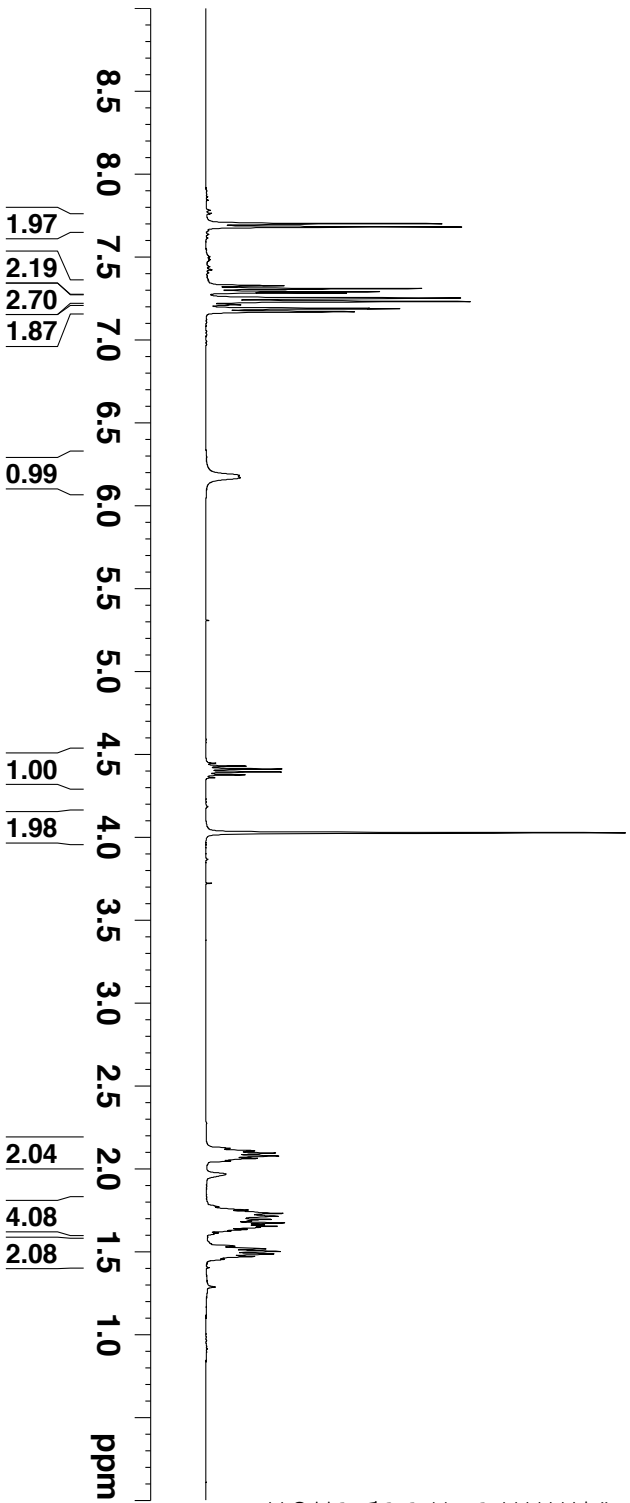

```

Current Data Parameters
NAME          PM-4-17-4
EXPNO        3
PROCNO       1

F2 - Acquisition Parameters
Date_        20120711
Time_        11.39
INSTRUM      spect
PROBHD       5 mm CPQNP 1H/
PULPROG      zg30
TD           65536
SOLVENT      CDCl3
NS           16
DS           2
SWH          8278.146 Hz
FIDRES       0.126314 Hz
AQ           3.9584243 sec
RG           7.1
DE           60.400 usec
TE           298.2 K
D1           1.00000000 sec
TD0          1

===== CHANNEL f1 =====
NUC1          1H
P1           15.00 usec
PL1          4.90 dB
PL1W         3.30822015 W
SFO1         400.1324710 MHz

F2 - Processing parameters
SI           32768
SF           400.1300000 MHz
WDW          EM
SSB          0
LB           0.30 Hz
GB           0
PC           1.00
    
```

Compound 7, <sup>13</sup>C NMR



- 167.10
- 144.66
- 140.40
- 132.81
- 129.08
- 128.92
- 128.60
- 127.12
- 126.33

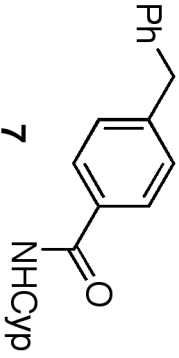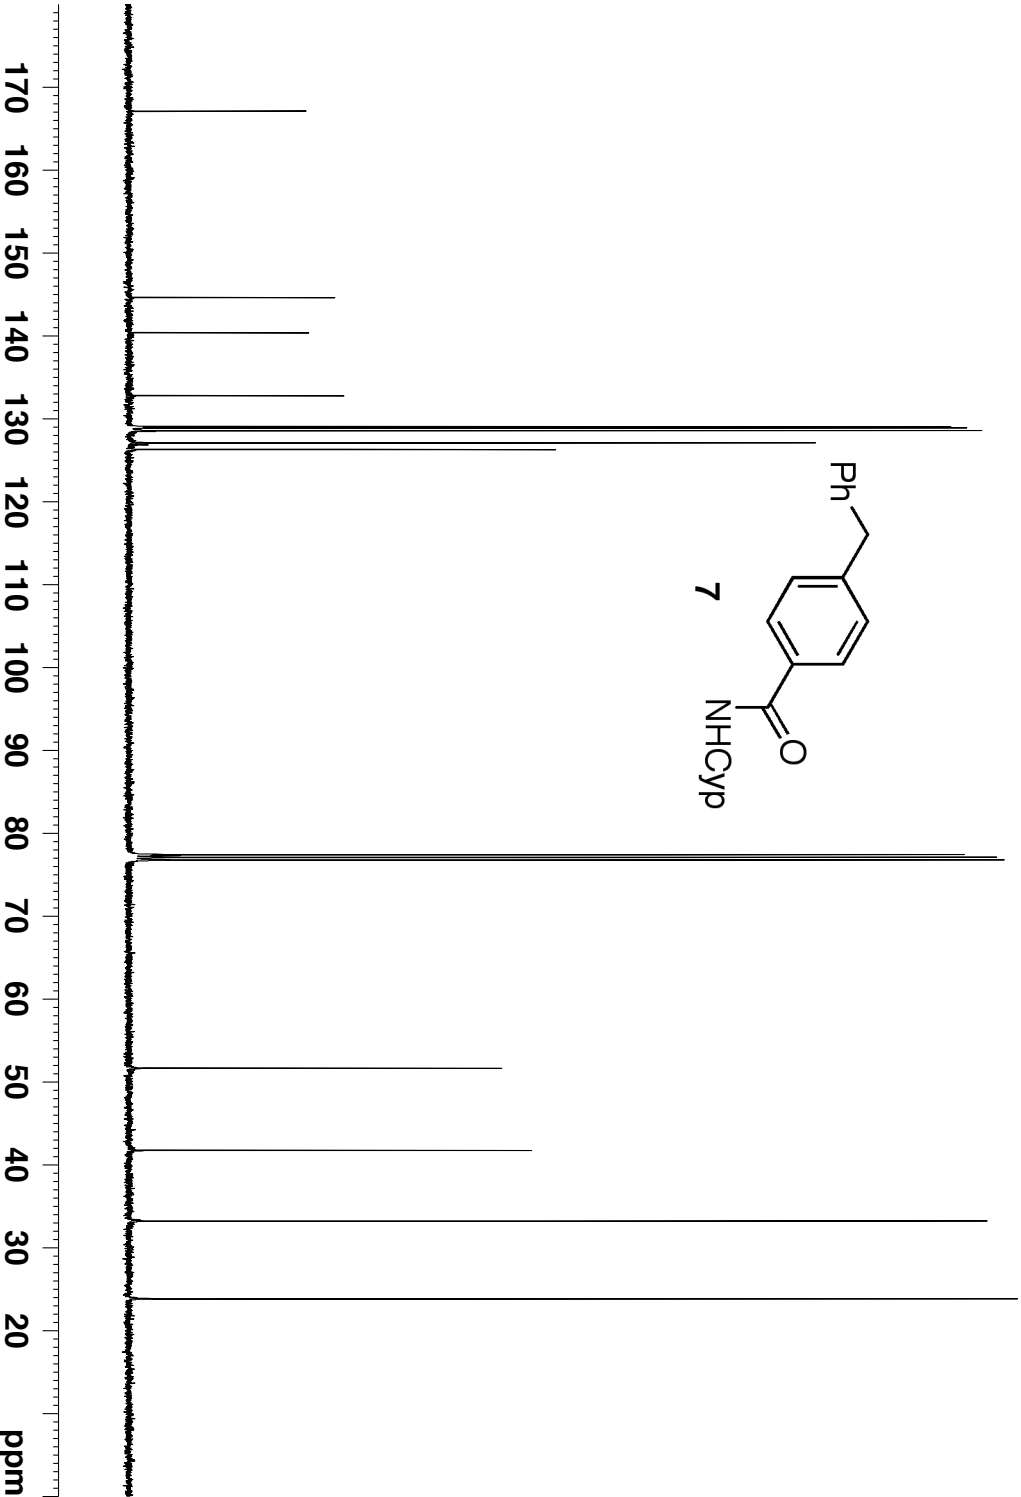

Current Data Parameters  
 NAME PM-4-17-4  
 EXPNO 4  
 PROCNO 1

F2 - Acquisition Parameters  
 Date\_ 20120711  
 Time\_ 11.43

INSTRUM spect  
 PROBHD 5 mm CPQNP 1H/  
 PULPROG zgpg30  
 TD 65536  
 SOLVENT CDCl3  
 NS 32  
 DS 4

SWH 23980.814 Hz  
 FIDRES 0.365918 Hz  
 AQ 1.3664756 sec

RG 512  
 DW 20.850 usec  
 DE 18.00 usec  
 TE 298.2 K  
 D1 2.00000000 sec  
 D11 0.03000000 sec  
 TD0 1

===== CHANNEL f1 =====

NUC1 13C  
 P1 9.25 usec  
 PL1 0.55 dB  
 PL1W 35.18820572 W  
 SFO1 100.6228298 MHz

===== CHANNEL f2 =====

CPDPRG2 waltz16  
 NUC2 1H  
 PCPD2 90.00 usec  
 PL2 4.90 dB  
 PL12 20.46 dB  
 PL13 21.00 dB  
 PL12W 3.30822015 W  
 PL12W 0.09195905 W  
 PL13W 0.08120718 W  
 SFO2 400.1316005 MHz

F2 - Processing parameters

SI 32768  
 SF 100.6127690 MHz  
 WDM EM  
 SSB 0  
 LB 1.00 Hz  
 GB 0  
 PC 1.40

Compound 8, <sup>1</sup>H NMR

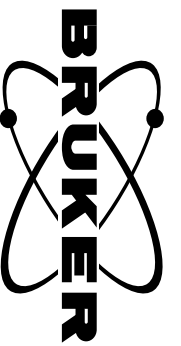

- 7.885
- 7.864
- 7.418
- 7.397
- 7.359
- 7.342
- 7.323
- 7.284
- 7.264
- 7.215
- 7.212
- 7.194

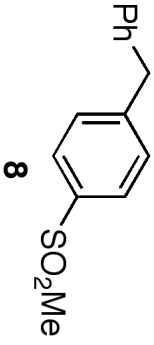

- 4.088
- 3.052

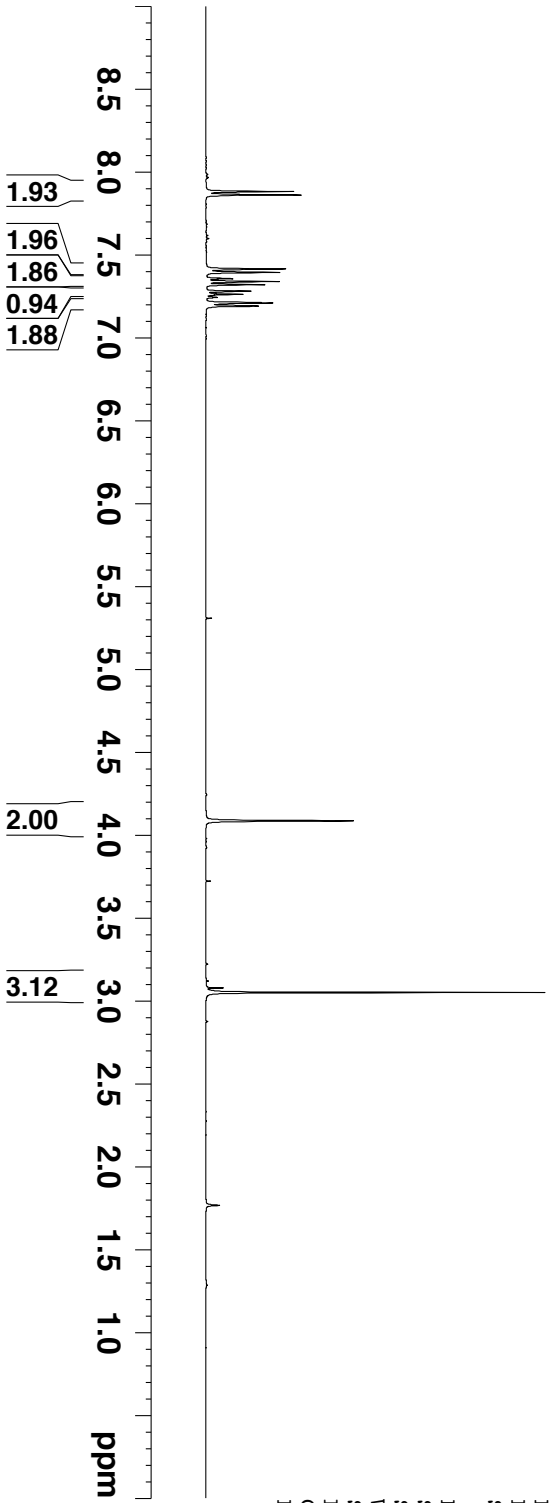

Current Data Parameters  
 NAME PM-4-10-1  
 EXPNO 1  
 PROCNO 1

F2 - Acquisition Parameters  
 Date\_ 20120705  
 Time\_ 5.41  
 INSTRUM spect  
 PROBHD 5 mm CPQNP 1H/  
 PULPROG zg30  
 TD 65536  
 SOLVENT CDCl3  
 NS 16  
 DS 2  
 SWH 8278.146 Hz  
 FIDRES 0.126314 Hz  
 AQ 3.9584243 sec  
 RG 11.3  
 DW 60.400 usec  
 DE 6.00 usec  
 TE 298.2 K  
 D1 1.00000000 sec  
 TD0 1

==== CHANNEL f1 =====  
 NUC1 1H  
 P1 15.00 usec  
 PL1 4.90 dB  
 PL1W 3.30822015 W  
 SFO1 400.1324710 MHz

F2 - Processing parameters  
 SI 32768  
 SF 400.1300000 MHz  
 WDW EM  
 SSB 0  
 LB 0.30 Hz  
 GB 0  
 PC 1.00

Compound 8, <sup>13</sup>CNMR



147.76  
139.46  
138.32  
129.84  
129.01  
128.80  
127.64  
126.70

44.60  
41.82

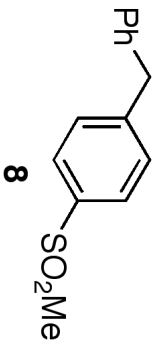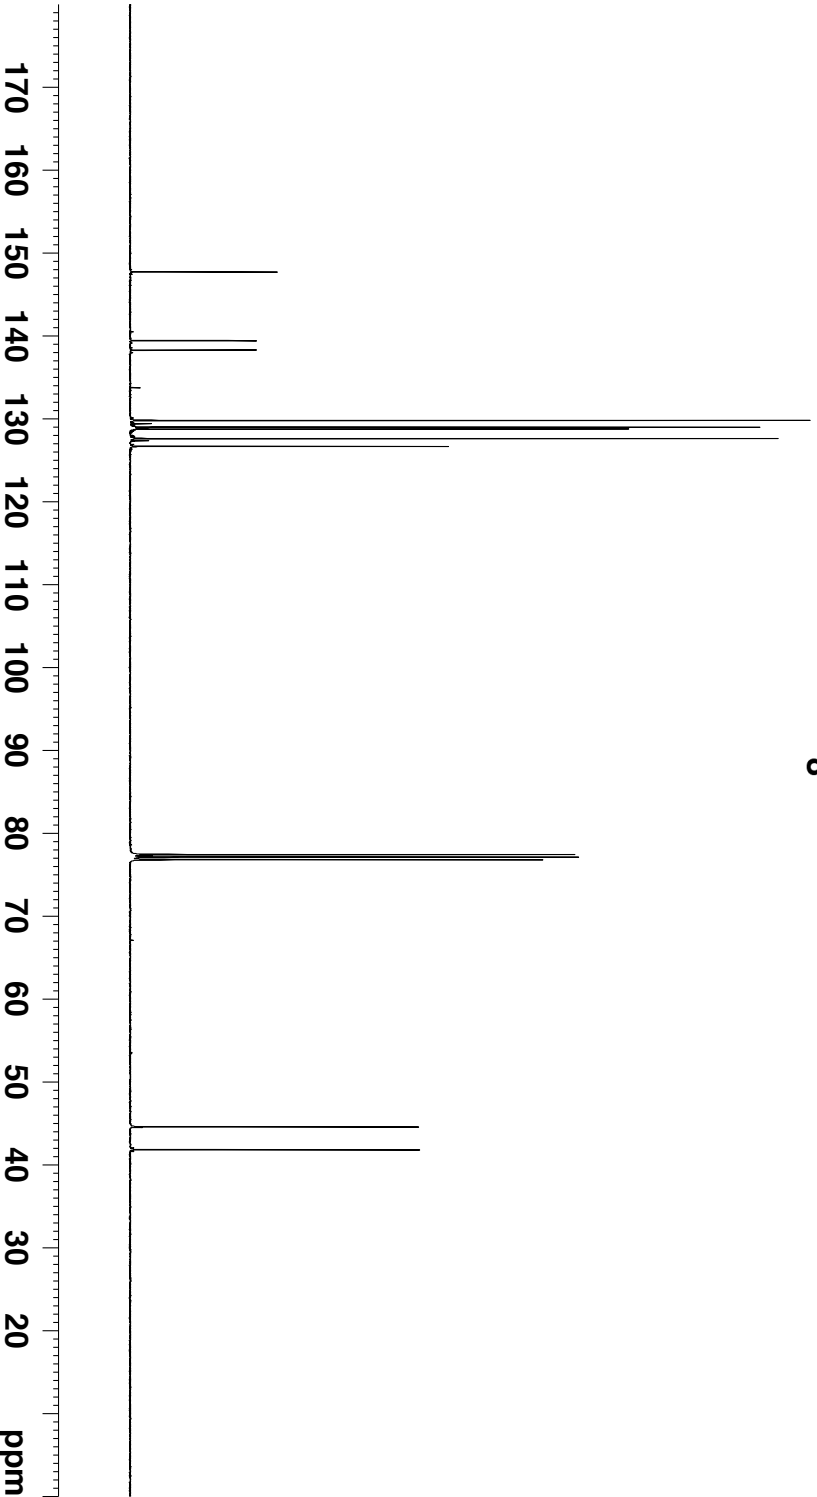

Current Data Parameters  
NAME PM-4-10-1  
EXPNO 2  
PROCNO 1

F2 - Acquisition Parameters  
Date\_ 20120705  
Time\_ 5.57

INSTRUM spect  
PROBHD 5 mm CPQNP 1H/  
PULPROG zgpg30  
TD 65536  
SOLVENT CDC13  
NS 256  
DS 4  
SWH 23980.814 Hz  
FIDRES 0.365918 Hz  
AQ 1.3664756 sec  
RG 512  
DW 20.850 usec  
DE 18.00 usec  
TE 298.2 K  
D1 2.00000000 sec  
D11 0.03000000 sec  
TD0 1

==== CHANNEL f1 =====  
NUC1 13C  
P1 9.25 usec  
PL1 0.55 dB  
PL1W 35.18820572 W  
SF01 100.6228298 MHz

==== CHANNEL f2 =====  
CPDPRG2 waltz16  
NUC2 1H  
PCPD2 90.00 usec  
PL2 4.90 dB  
PL12 20.46 dB  
PL13 21.00 dB  
PL2W 3.30822015 W  
PL12W 0.09195905 W  
PL13W 0.08120718 W  
SF02 400.1316005 MHz

F2 - Processing parameters  
SI 32768  
SF 100.6127690 MHz  
WDW EM  
SSB 0  
LB 1.00 Hz  
GB 0  
PC 1.40

Compound 9, <sup>1</sup>H NMR

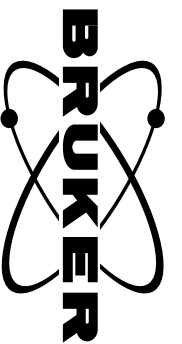

7.595  
7.574  
7.376  
7.359  
7.354  
7.340  
7.333  
7.297  
7.284  
7.279  
7.238  
7.235  
7.218

4.080

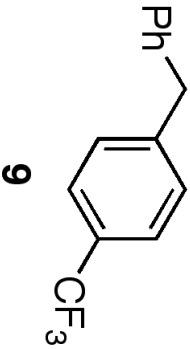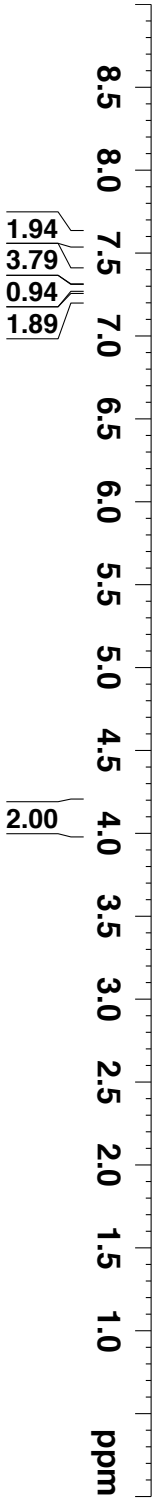

Current Data Parameters  
NAME PM-4-10-2  
EXPNO 1  
PROCNO 1

F2 - Acquisition Parameters  
Date\_ 20120705  
Time\_ 6.03  
INSTRUM spect  
PROBHD 5 mm CPQNP 1H/  
PULPROG zg30  
TD 65536  
SOLVENT CDCl3  
NS 16  
DS 2  
SWH 8278.146 Hz  
FIDRES 0.126314 Hz  
AQ 3.9584243 sec  
RG 11.3  
DW 60.400 usec  
DE 6.00 usec  
TE 298.1 K  
D1 1.00000000 sec  
TD0 1

==== CHANNEL f1 =====  
NUC1 1H  
P1 15.00 usec  
PL1 4.90 dB  
PL1W 3.30822015 W  
SFO1 400.1324710 MHz

F2 - Processing parameters  
SI 32768  
SF 400.1300000 MHz  
WDW EM  
SSB 0  
LB 0.30 Hz  
GB 0  
PC 1.00



Compound 9, <sup>13</sup>CNMR

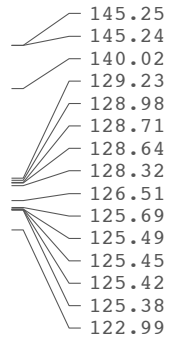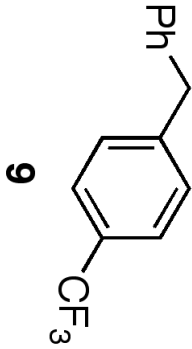

41.74

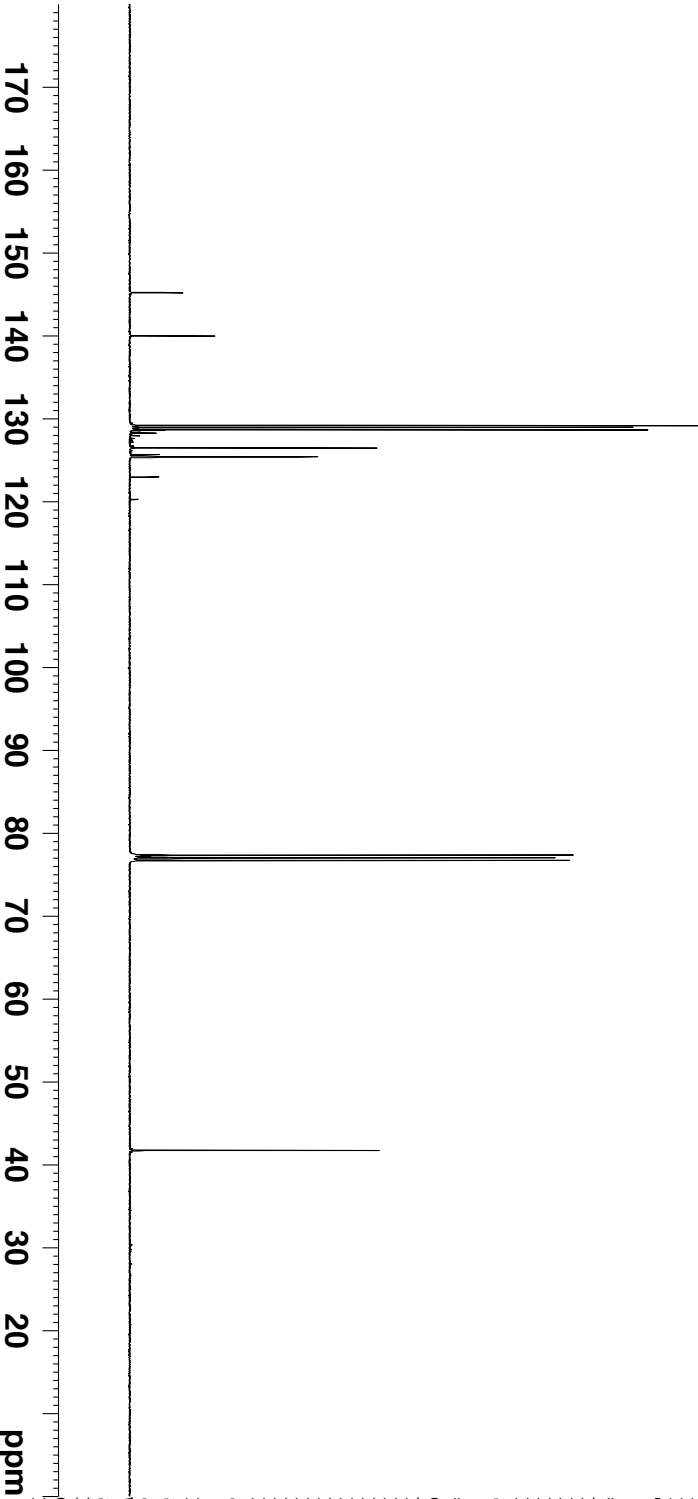

Current Data Parameters  
 NAME PM-4-10-2  
 EXPNO 2  
 PROCNO 1

F2 - Acquisition Parameters  
 Date\_ 20120705  
 Time\_ 6.19

INSTRUM spect  
 PROBHD 5 mm CPQNP 1H/  
 PULPROG zgpg30  
 TD 65536  
 SOLVENT CDC13  
 NS 256  
 DS 4  
 SWH 23980.814 Hz  
 FIDRES 0.365918 Hz  
 AQ 1.3664756 sec  
 RG 512  
 DW 20.850 usec  
 DE 18.00 usec  
 TE 298.2 K  
 D1 2.00000000 sec  
 D11 0.03000000 sec  
 TD0 1

==== CHANNEL F1 =====  
 NUC1 13C  
 P1 9.25 usec  
 PL1 0.55 dB  
 PL1W 35.18820572 W  
 SFO1 100.6228298 MHz

==== CHANNEL F2 =====  
 CPDPRG2 waltz16  
 NUC2 1H  
 PCPD2 90.00 usec  
 PL2 4.90 dB  
 PL12 20.46 dB  
 PL13 21.00 dB  
 PL12W 3.30822015 W  
 PL12W 0.09195905 W  
 PL13W 0.08120718 W  
 SFO2 400.1316005 MHz

F2 - Processing parameters  
 SI 32768  
 SF 100.6127690 MHz  
 WDM EM  
 SSB 0  
 LB 1.00 Hz  
 GB 0  
 PC 1.40

Compound 10, <sup>1</sup>H NMR



7.349  
7.336  
7.331  
7.304  
7.284  
7.277  
7.261  
7.256  
7.238  
7.158  
7.155  
7.140  
7.136  
6.975  
6.957  
6.953  
6.938  
6.932

4.063  
3.883

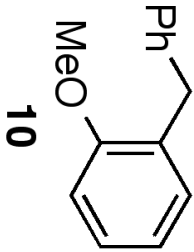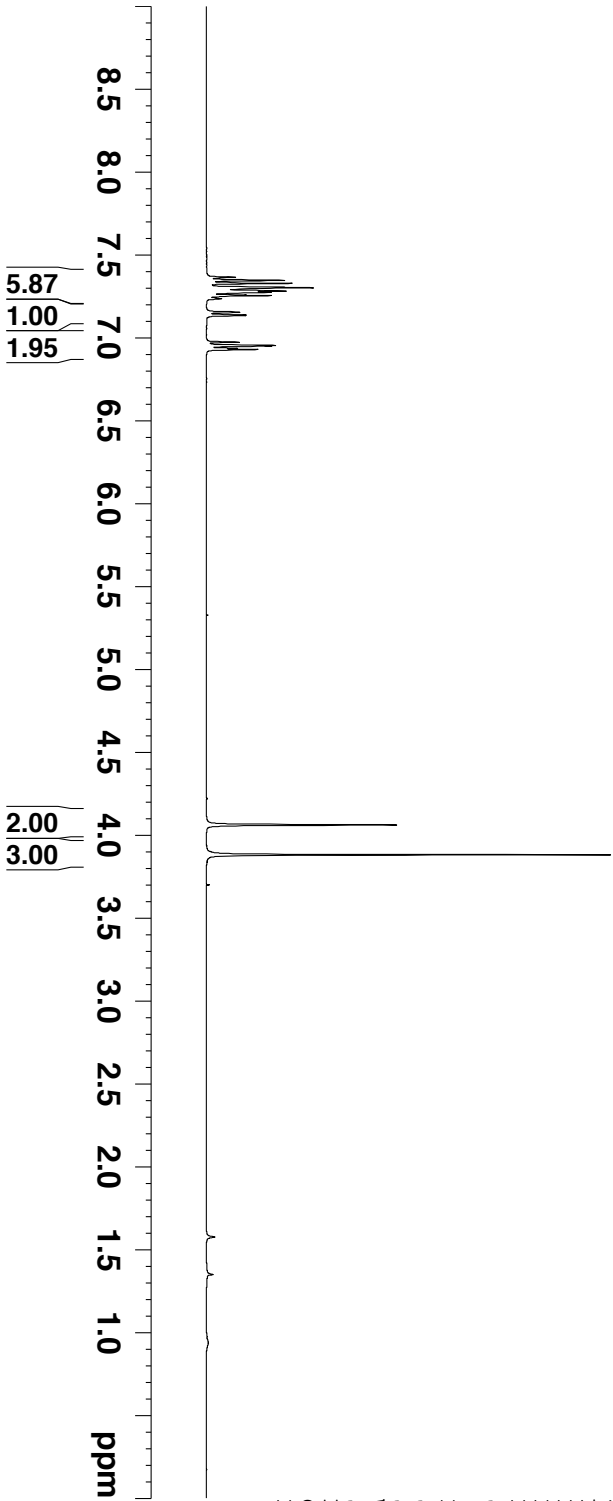

Current Data Parameters  
NAME PM-4-18-2  
EXPNO 1  
PROCNO 1

F2 - Acquisition Parameters  
Date\_ 20120711  
Time 12.36  
INSTRUM spect  
PROBHD 5 mm CPQNP 1H/  
PULPROG zg30  
TD 65536  
SOLVENT CDCl3  
NS 16  
DS 2  
SWH 8278.146 Hz  
FIDRES 0.126314 Hz  
AQ 3.9584243 sec  
RG 14.3  
DW 60.400 usec  
DE 6.00 usec  
TE 298.2 K  
D1 1.00000000 sec  
TD0 1

==== CHANNEL f1 =====  
NUC1 1H  
P1 15.00 usec  
PL1 4.90 dB  
PL1W 3.30822015 W  
SFO1 400.1324710 MHz

F2 - Processing parameters  
SI 32768  
SF 400.1300000 MHz  
WDW EM  
SSB 0  
LB 0.30 Hz  
GB 0  
PC 1.00

Compound 10, <sup>13</sup>CNMR

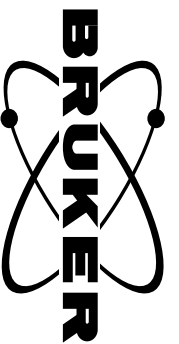

157.38  
141.08  
130.38  
129.70  
129.04  
128.33  
127.48  
125.85  
120.52  
110.42

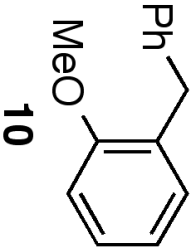

55.39  
35.92

170 160 150 140 130 120 110 100 90 80 70 60 50 40 30 20 ppm

Current Data Parameters  
NAME PM-4-18-2  
EXPNO 2  
PROCNO 1

F2 - Acquisition Parameters  
Date\_ 20120711  
Time\_ 12.39

INSTRUM spect  
PROBHD 5 mm CPQNP 1H/  
PULPROG zgpg30  
TD 65536  
SOLVENT CDC13  
NS 32  
DS 4  
SWH 23980.814 Hz  
FIDRES 0.365918 Hz  
AQ 1.3664756 sec  
RG 512  
DW 20.850 usec  
DE 18.00 usec  
TE 298.2 K  
D1 2.00000000 sec  
D11 0.03000000 sec  
TD0 1

==== CHANNEL f1 =====  
NUC1 13C  
P1 9.25 usec  
PL1 0.55 dB  
PL1W 35.18820572 W  
SFO1 100.6228298 MHz

==== CHANNEL f2 =====  
CPDPRG2 waltz16  
NUC2 1H  
PCPD2 90.00 usec  
PL2 4.90 dB  
PL12 20.46 dB  
PL13 21.00 dB  
PL12W 3.30822015 W  
PL12W 0.09195905 W  
PL13W 0.08120718 W  
SFO2 400.1316005 MHz

F2 - Processing parameters  
SI 32768  
SF 100.6127690 MHz  
WDW EM  
SSB 0  
LB 1.00 Hz  
GB 0  
PC 1.40

Compound 11, <sup>1</sup>H NMR



Current Data Parameters  
 NAME PM-4-36-5, pure  
 EXPNO 1  
 PROCNO 1

F2 - Acquisition Parameters  
 Date\_ 20120727  
 Time\_ 10.52

INSTRUM spect  
 PROBHD 5 mm CPQNP 1H/  
 PULPROG zg30  
 TD 65536  
 SOLVENT CDCl3  
 NS 16  
 DS 2  
 SWH 8278.146 Hz  
 FIDRES 0.126314 Hz  
 AQ 3.9584243 sec  
 RG 10.1  
 DW 60.400 usec  
 DE 6.00 usec  
 TE 298.2 K  
 D1 1.00000000 sec  
 TD0 1

==== CHANNEL f1 =====  
 NUC1 1H  
 P1 15.00 usec  
 PL1 4.90 dB  
 PL1W 3.30822015 W  
 SFO1 400.1324710 MHz

F2 - Processing parameters  
 SI 32768  
 SF 400.1300000 MHz  
 WDW EM  
 SSB 0  
 LB 0.30 Hz  
 GB 0  
 PC 1.00

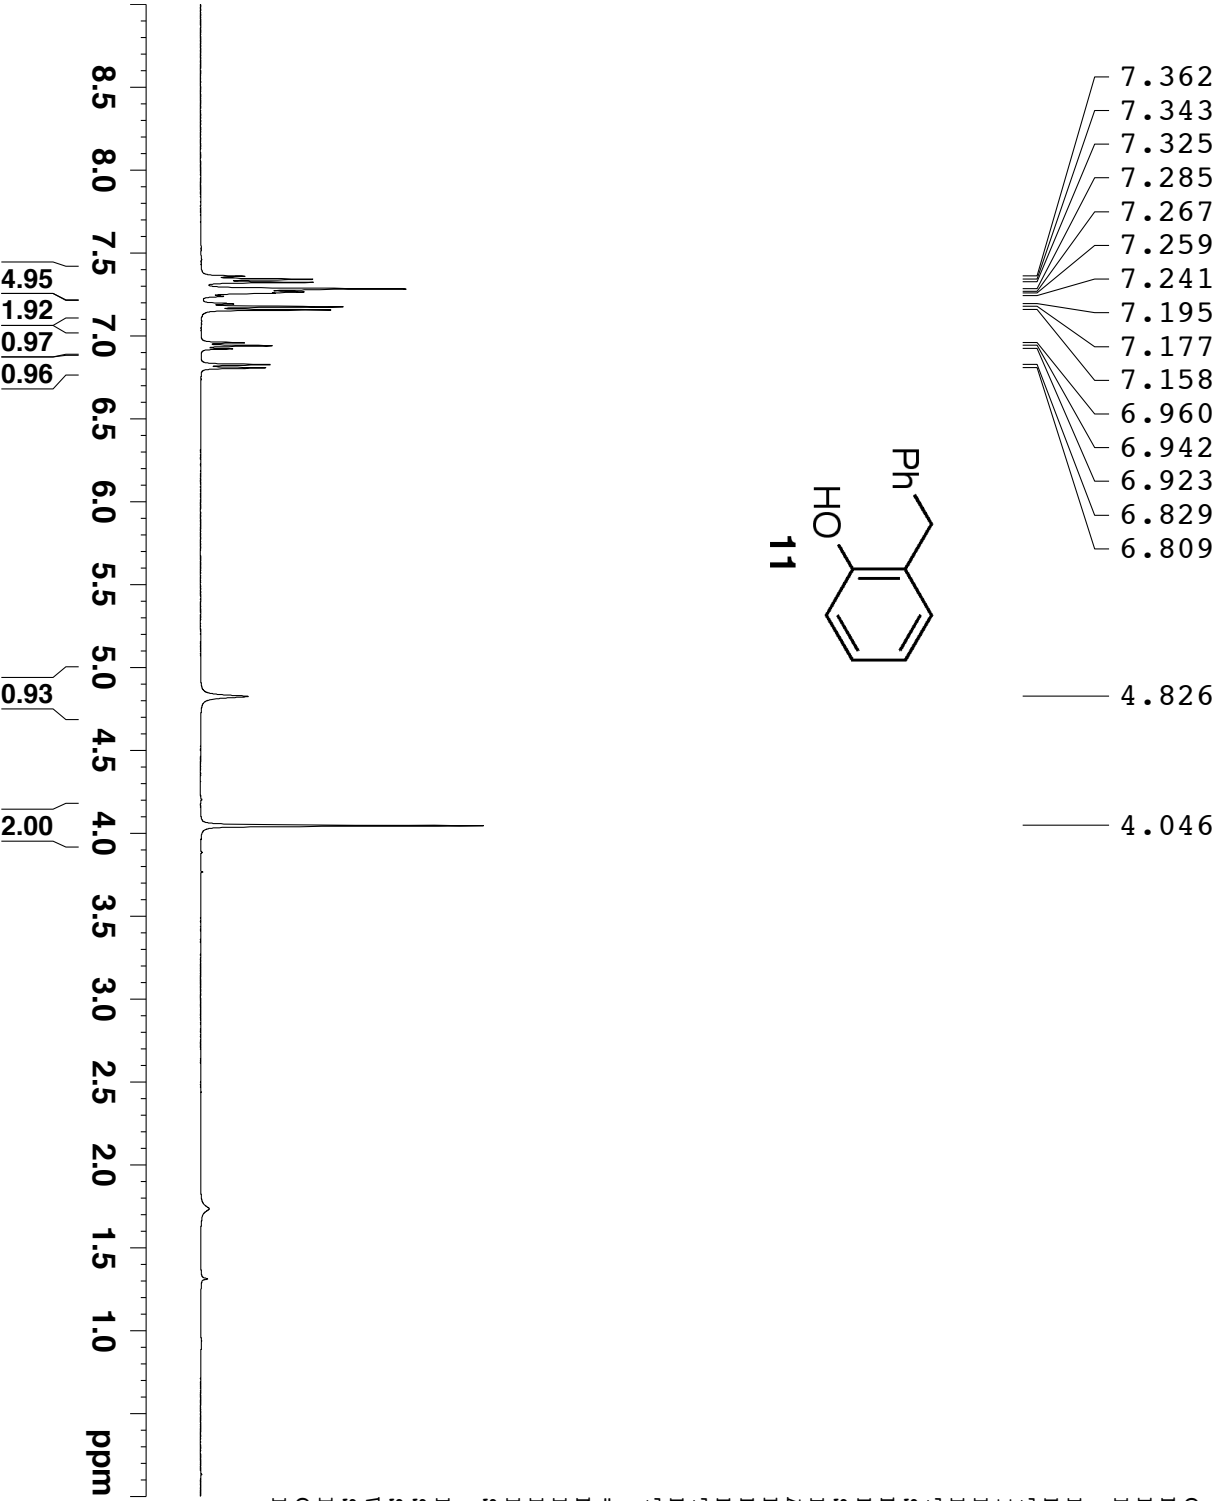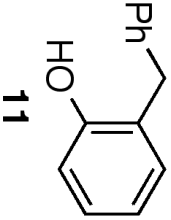

Compound 11, <sup>13</sup>CNMR

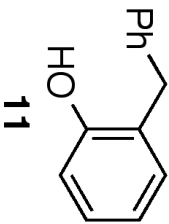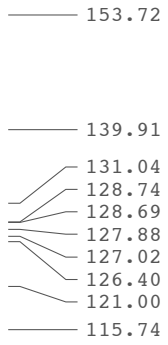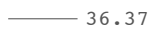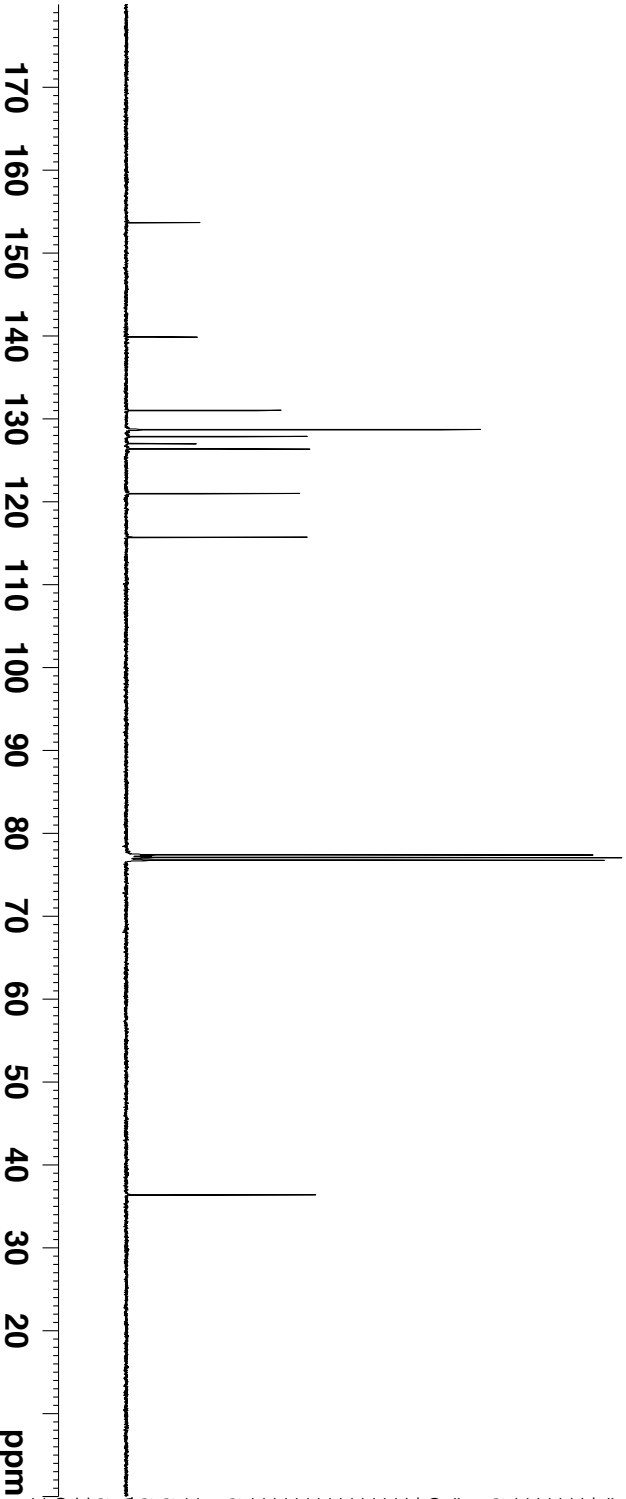

Current Data Parameters  
 NAME PW-4-36-5, pure  
 EXPNO 2  
 PROCNO 1

F2 - Acquisition Parameters  
 Date\_ 20120727  
 Time\_ 10.55  
 INSTRUM spect  
 PROBHD 5 mm CPQNP 1H/  
 PULPROG zgpg30  
 TD 65536  
 SOLVENT CDCl3  
 NS 32  
 DS 4  
 SWH 23980.814 Hz  
 FIDRES 0.365918 Hz  
 AQ 1.3664756 sec  
 RG 512  
 DW 20.850 usec  
 DE 18.00 usec  
 TE 298.2 K  
 D1 2.00000000 sec  
 D11 0.03000000 sec  
 TD0 1

==== CHANNEL f1 =====  
 NUC1 13C  
 P1 9.25 usec  
 PL1 0.55 dB  
 PL1W 35.18820572 W  
 SFO1 100.6228298 MHz

==== CHANNEL f2 =====  
 CPDPRG2 waltz16  
 NUC2 1H  
 PCPD2 90.00 usec  
 PL2 4.90 dB  
 PL12 20.46 dB  
 PL13 21.00 dB  
 PL12W 3.30822015 W  
 PL12W 0.09195905 W  
 PL13W 0.08120718 W  
 SFO2 400.1316005 MHz

F2 - Processing parameters  
 SI 32768  
 SF 100.6127690 MHz  
 WDM EM  
 SSB 0  
 LB 1.00 Hz  
 GB 0  
 PC 1.40

Compound 12, <sup>1</sup>H NMR

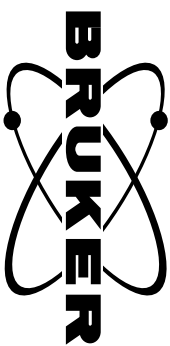

Current Data Parameters  
 NAME PM-4-17-4  
 EXPNO 1  
 PROCNO 1

F2 - Acquisition Parameters

Date\_ 20120705  
 Time\_ 6.25  
 INSTRUM spect  
 PROBHD 5 mm CPQNP 1H/  
 PULPROG zg30  
 TD 65536  
 SOLVENT CDCl3  
 NS 16  
 DS 2  
 SWH 8278.146 Hz  
 FIDRES 0.126314 Hz  
 AQ 3.9584243 sec  
 RG 11.3  
 DW 60.400 usec  
 DE 6.00 usec  
 TE 298.1 K  
 D1 1.00000000 sec  
 TD0 1

==== CHANNEL f1 =====  
 NUC1 1H  
 P1 15.00 usec  
 PL1 4.90 dB  
 PL1W 3.30822015 W  
 SFO1 400.1324710 MHz

F2 - Processing parameters

SI 32768  
 SF 400.1300000 MHz  
 WDW EM  
 SSB 0  
 LB 0.30 Hz  
 GB 0  
 PC 1.00

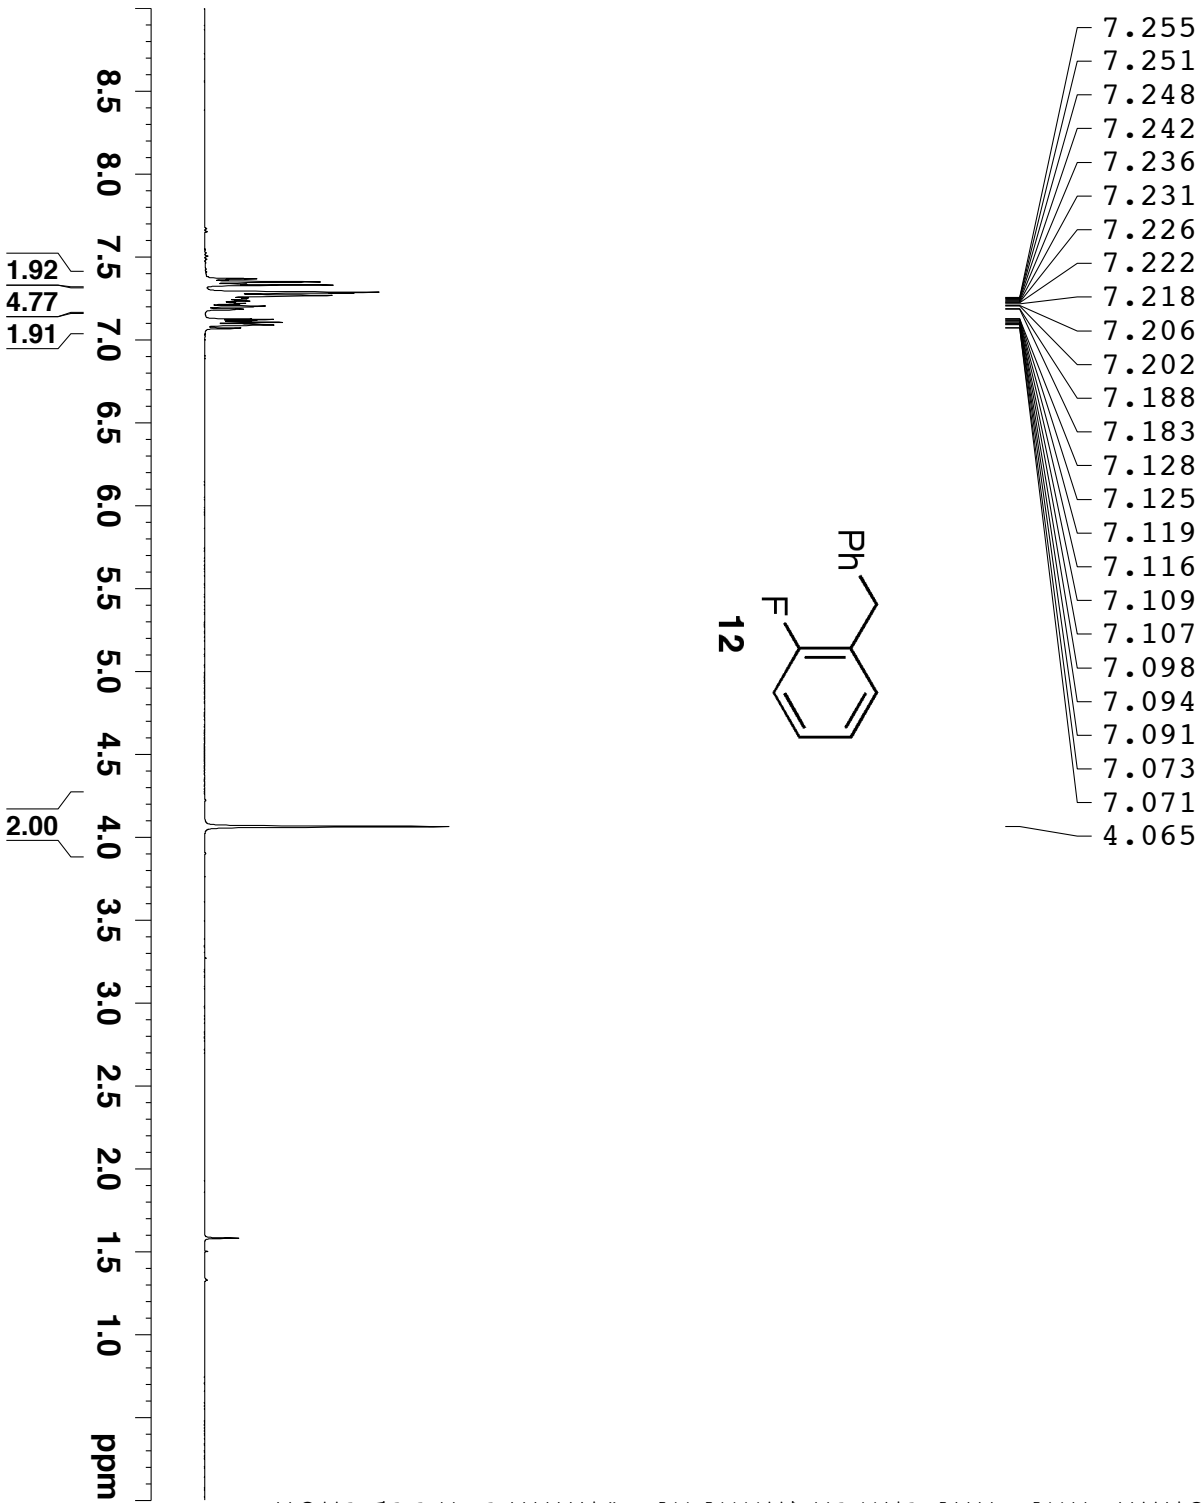

Compound 12, <sup>13</sup>CNMR

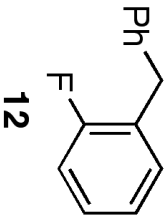

162.22  
159.78

139.90  
131.11  
131.06  
128.85  
128.56  
128.04  
127.96  
126.28  
124.14  
124.10  
115.48  
115.26

34.87  
34.84

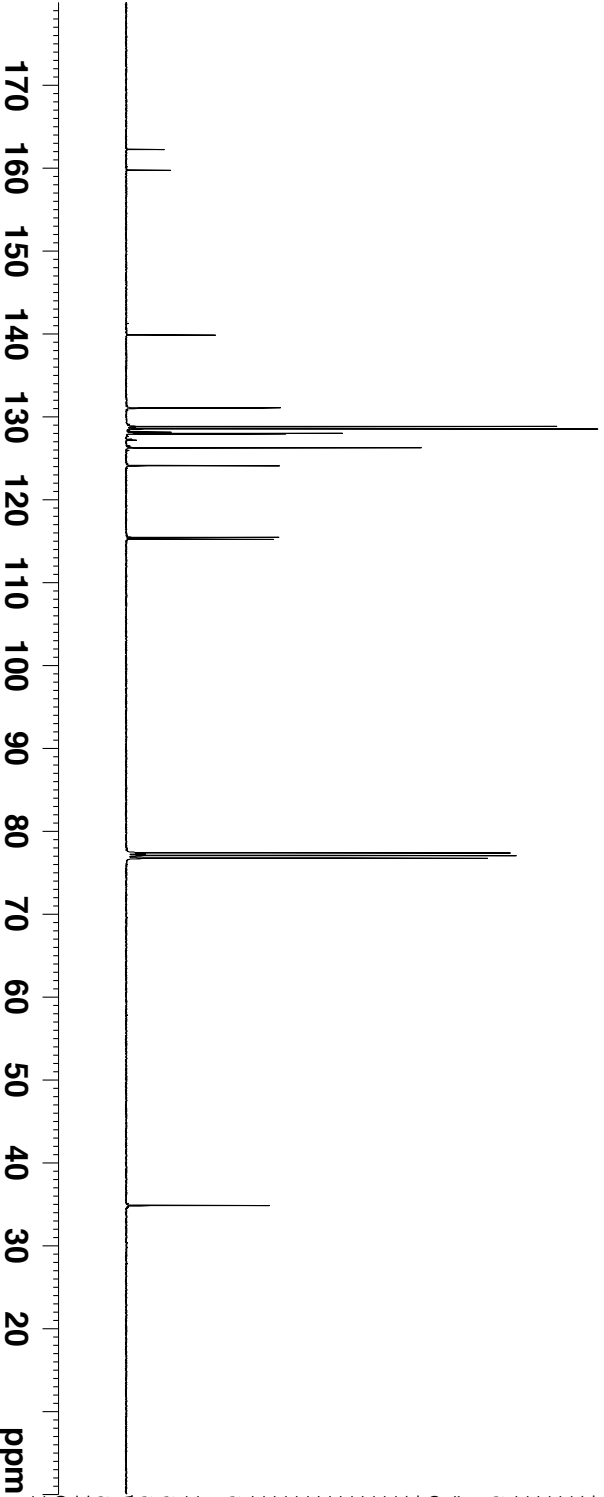

Current Data Parameters  
NAME PM-4-17-4  
EXPNO 2  
PROCNO 1

F2 - Acquisition Parameters  
Date\_ 20120705  
Time\_ 6.41

INSTRUM spect  
PROBHD 5 mm CPQNP 1H/  
PULPROG zgpg30  
TD 65536  
SOLVENT CDC13  
NS 256  
DS 4  
SWH 23980.814 Hz  
FIDRES 0.365918 Hz  
AQ 1.3664756 sec  
RG 512  
DW 20.850 usec  
DE 18.00 usec  
TE 298.1 K  
D1 2.00000000 sec  
D11 0.03000000 sec  
TD0 1

==== CHANNEL f1 =====  
NUC1 13C  
P1 9.25 usec  
PL1 0.55 dB  
PL1W 35.18820572 W  
SFO1 100.6228298 MHz

==== CHANNEL f2 =====  
CPDPRG2 waltz16  
NUC2 1H  
PCPD2 90.00 usec  
PL2 4.90 dB  
PL12 20.46 dB  
PL13 21.00 dB  
PL12W 3.30822015 W  
PL12W 0.09195905 W  
PL13W 0.08120718 W  
SFO2 400.1316005 MHz

F2 - Processing parameters  
SI 32768  
SF 100.6127690 MHz  
WDW EM  
SSB 0  
LB 1.00 Hz  
GB 0  
PC 1.40

Compound 12, <sup>19</sup>F NMR

-117.78  
-117.80

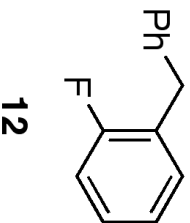

Current Data Parameters  
NAME PM-4-17-4, rerun  
EXPNO 1  
PROCNO 1

F2 - Acquisition Parameters  
Date\_ 20120816  
Time 10.37  
INSTRUM spect  
PROBHD 5 mm CPQNP 1H/  
PULPROG zg  
TD 131072  
SOLVENT CDCl3  
NS 16  
DS 2  
SWH 75187.969 Hz  
FIDRES 0.573639 Hz  
AQ 0.8716788 sec  
RG 1024  
DW 6.650 usec  
DE 20.00 usec  
TE 298.2 K  
D1 2.00000000 sec  
TD0 1

==== CHANNEL f1 =====  
NUC1 19F  
P1 15.03 usec  
PL1 -4.00 dB  
PL1W 25.74305916 W  
SFO1 376.4607164 MHz

F2 - Processing parameters  
SI 65536  
SF 376.4983660 MHz  
WDW EM  
SSB 0  
LB 2.00 Hz  
GB 0  
PC 1.00

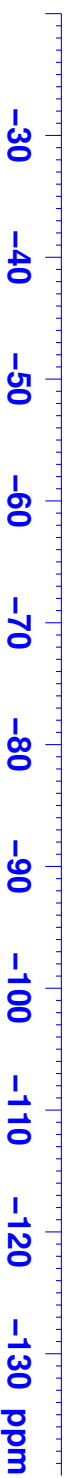



Compound 13, 1NMR

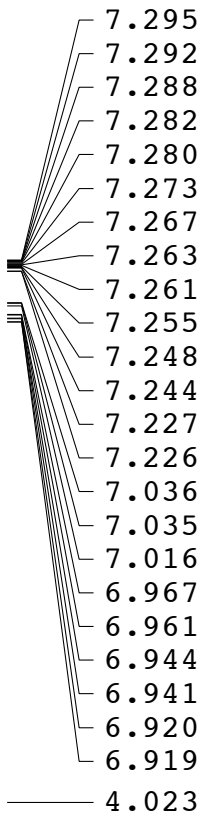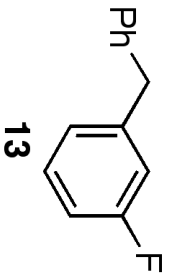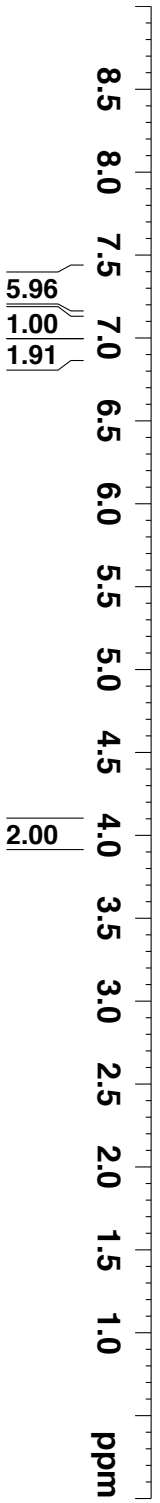

Current Data Parameters  
 NAME DM3-077-4  
 EXPNO 1  
 PROCNO 1

F2 - Acquisition Parameters  
 Date\_ 20120525  
 Time\_ 23.13  
 INSTRUM spect  
 PROBHD 5 mm CPQNP 1H/  
 PULPROG zg30  
 TD 65536  
 SOLVENT CDCl3  
 NS 16  
 DS 2  
 SWH 8278.146 Hz  
 FIDRES 0.126314 Hz  
 AO 3.9584243 sec  
 RG 10.1  
 DW 60.400 usec  
 DE 6.00 usec  
 TE 298.1 K  
 D1 1.00000000 sec  
 TD0 1

==== CHANNEL f1 =====  
 NUC1 1H  
 P1 15.00 usec  
 PL1 4.90 dB  
 PL1W 3.30822015 W  
 SFO1 400.1324710 MHz

F2 - Processing parameters  
 SI 32768  
 SF 400.1300000 MHz  
 WDW EM  
 SSB 0  
 LB 0.30 Hz  
 GB 0  
 PC 1.00

Compound 13, <sup>13</sup>CNMR



164.22  
161.78  
143.76  
143.69  
140.33  
129.92  
129.84  
128.98  
128.63  
126.39  
124.60  
124.57  
115.93  
115.72  
113.14  
112.93

41.67  
41.65

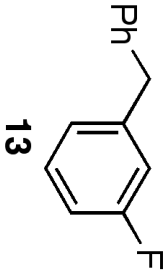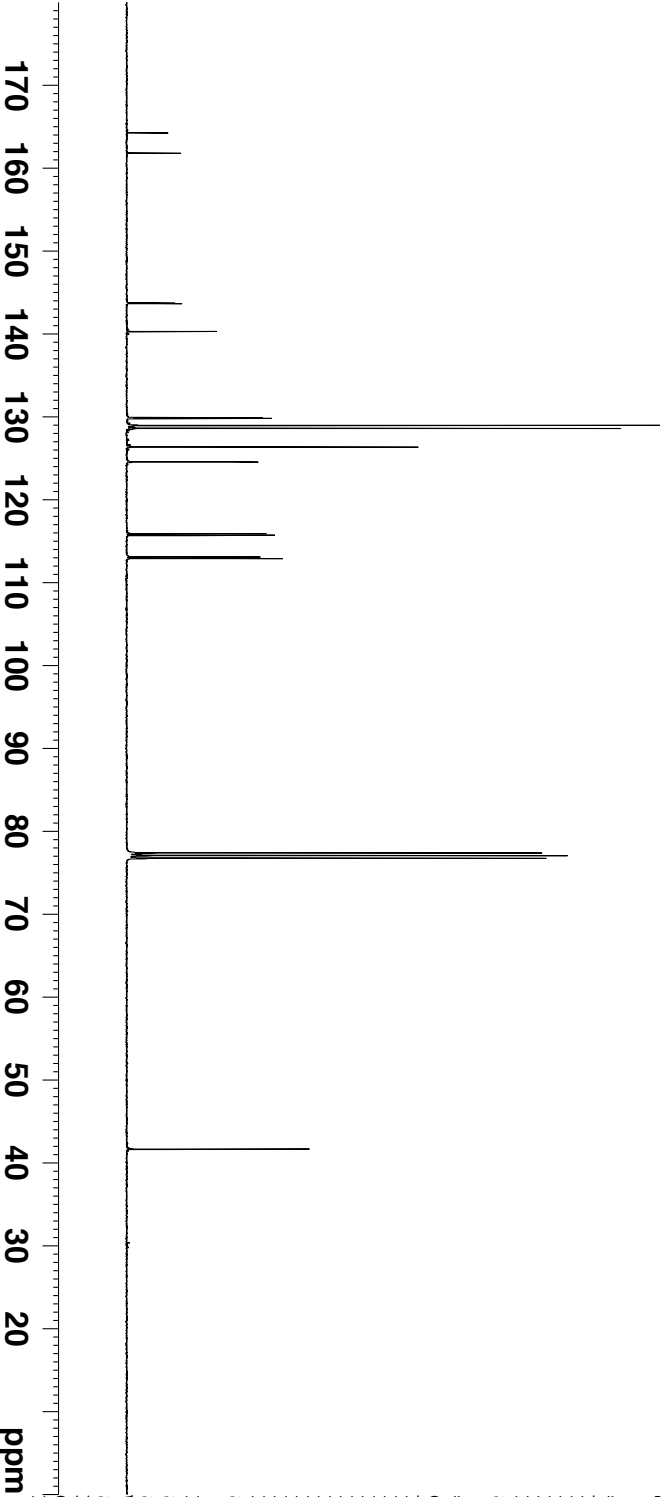

Current Data Parameters  
NAME DM3-077-4  
EXPNO 2  
PROCNO 1

F2 - Acquisition Parameters  
Date\_ 20120526  
Time\_ 2.31

INSTRUM spect  
PROBHD 5 mm CPQNP 1H/  
PULPROG zgpg30  
TD 65536  
SOLVENT CDC13  
NS 256  
DS 4

SWH 23980.814 Hz  
FIDRES 0.365918 Hz  
AQ 1.3664756 sec  
RG 512  
DW 20.850 usec  
DE 18.00 usec  
TE 298.2 K  
D1 2.00000000 sec  
D11 0.03000000 sec  
TD0 1

==== CHANNEL f1 =====  
NUC1 13C  
P1 9.25 usec  
PL1 0.55 dB  
PL1W 35.18820572 W  
SF01 100.6228298 MHz

==== CHANNEL f2 =====  
CPDPRG2 waltz16  
NUC2 1H  
PCPD2 90.00 usec  
PL2 4.90 dB  
PL12 20.46 dB  
PL13 21.00 dB  
PL12W 3.30822015 W  
PL12W 0.09195905 W  
PL13W 0.08120718 W  
SF02 400.1316005 MHz

F2 - Processing parameters  
SI 32768  
SF 100.6127690 MHz  
WDW EM  
SSB 0  
LB 1.00 Hz  
GB 0  
PC 1.40

Compound 14, <sup>1</sup>H NMR



Current Data Parameters  
 NAME PM-4-18-1  
 EXPNO 1  
 PROCNO 1

F2 - Acquisition Parameters  
 Date\_ 20120711  
 Time\_ 11.58

INSTRUM spect  
 PROBHD 5 mm CPQNP 1H/  
 PULPROG zg30  
 TD 65536  
 SOLVENT CDCl3  
 NS 16  
 DS 2  
 SWH 8278.146 Hz  
 FIDRES 0.126314 Hz  
 AQ 3.9584243 sec  
 RG 14.3  
 DW 60.400 usec  
 DE 6.00 usec  
 TE 298.2 K  
 D1 1.00000000 sec  
 TD0 1

==== CHANNEL f1 =====  
 NUC1 1H  
 P1 15.00 usec  
 PL1 4.90 dB  
 PL1W 3.30822015 W  
 SFO1 400.1324710 MHz

F2 - Processing parameters  
 SI 32768  
 SF 400.1300000 MHz  
 WDW EM  
 SSB 0  
 LB 0.30 Hz  
 GB 0  
 PC 1.00

- 7.367
- 7.348
- 7.330
- 7.289
- 7.284
- 7.270
- 7.268
- 7.260
- 7.248
- 6.864
- 6.845
- 6.824
- 6.819
- 6.803
- 4.020
- 3.825

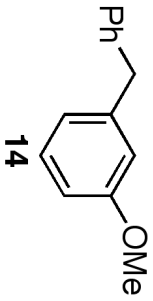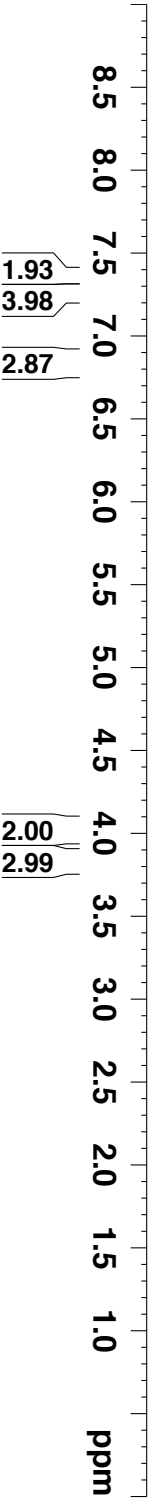

Compound 14, <sup>13</sup>CNMR

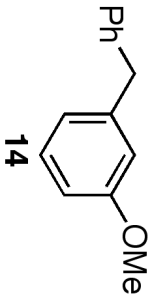

159.74  
142.76  
140.97  
129.48  
128.97  
128.52  
126.16  
121.43  
114.83  
111.33

55.17  
42.01

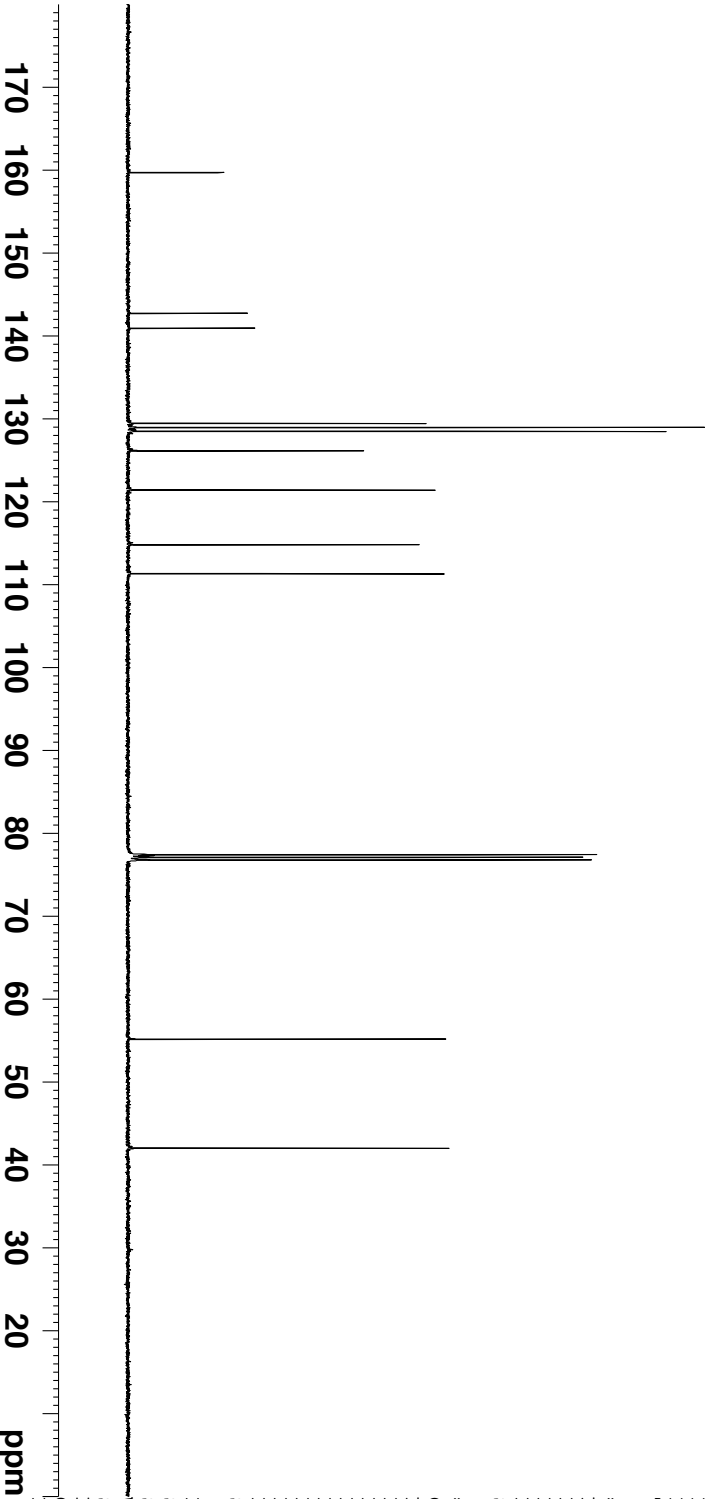

Current Data Parameters  
NAME PM-4-18-1  
EXPNO 2  
PROCNO 1

F2 - Acquisition Parameters  
Date\_ 20120711  
Time\_ 12.01

INSTRUM spect  
PROBHD 5 mm CPQNP 1H/  
PULPROG zgpg30  
TD 65536  
SOLVENT CDCl3  
NS 32  
DS 4  
SWH 23980.814 Hz  
FIDRES 0.365918 Hz  
AQ 1.3664756 sec  
RG 512  
DW 20.850 usec  
DE 18.00 usec  
TE 298.2 K  
D1 2.00000000 sec  
D11 0.03000000 sec  
TD0 1

==== CHANNEL f1 =====  
NUC1 13C  
P1 9.25 usec  
PL1 0.55 dB  
PL1W 35.18820572 W  
SF01 100.6228298 MHz

==== CHANNEL f2 =====  
CPDPRG2 waltz16  
NUC2 1H  
PCPD2 90.00 usec  
PL2 4.90 dB  
PL12 20.46 dB  
PL13 21.00 dB  
PL12W 3.30822015 W  
PL12W 0.09195905 W  
PL13W 0.08120718 W  
SF02 400.1316005 MHz

F2 - Processing parameters  
SI 32768  
SF 100.6127690 MHz  
WDW EM  
SSB 0  
LB 1.00 Hz  
GB 0  
PC 1.40

170 160 150 140 130 120 110 100 90 80 70 60 50 40 30 20 ppm

Compound 15, <sup>1</sup>H NMR

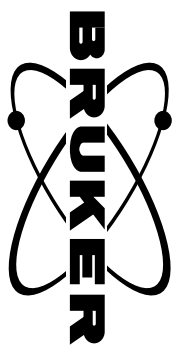

Current Data Parameters  
 NAME DMM3-077-2-2  
 EXPNO 1  
 PROCNO 1

F2 - Acquisition Parameters

Date\_ 20120522  
 Time\_ 18.07  
 INSTRUM spect  
 PROBHD 5 mm CPQNP 1H/  
 PULPROG zg30  
 TD 65536  
 SOLVENT CDCl3  
 NS 16  
 DS 2  
 SWH 8278.146 Hz  
 FIDRES 0.126314 Hz  
 AQ 3.9584243 sec  
 RG 11.3  
 DW 60.400 usec  
 DE 6.00 usec  
 TE 298.1 K  
 D1 1.00000000 sec  
 TD0 1

==== CHANNEL f1 =====  
 NUC1 1H  
 P1 15.00 usec  
 PL1 4.90 dB  
 PL1W 3.30822015 W  
 SFO1 400.1324710 MHz

F2 - Processing parameters  
 SI 32768  
 SF 400.1300000 MHz  
 WDW EM  
 SSB 0  
 LB 0.30 Hz  
 GB 0  
 PC 1.00

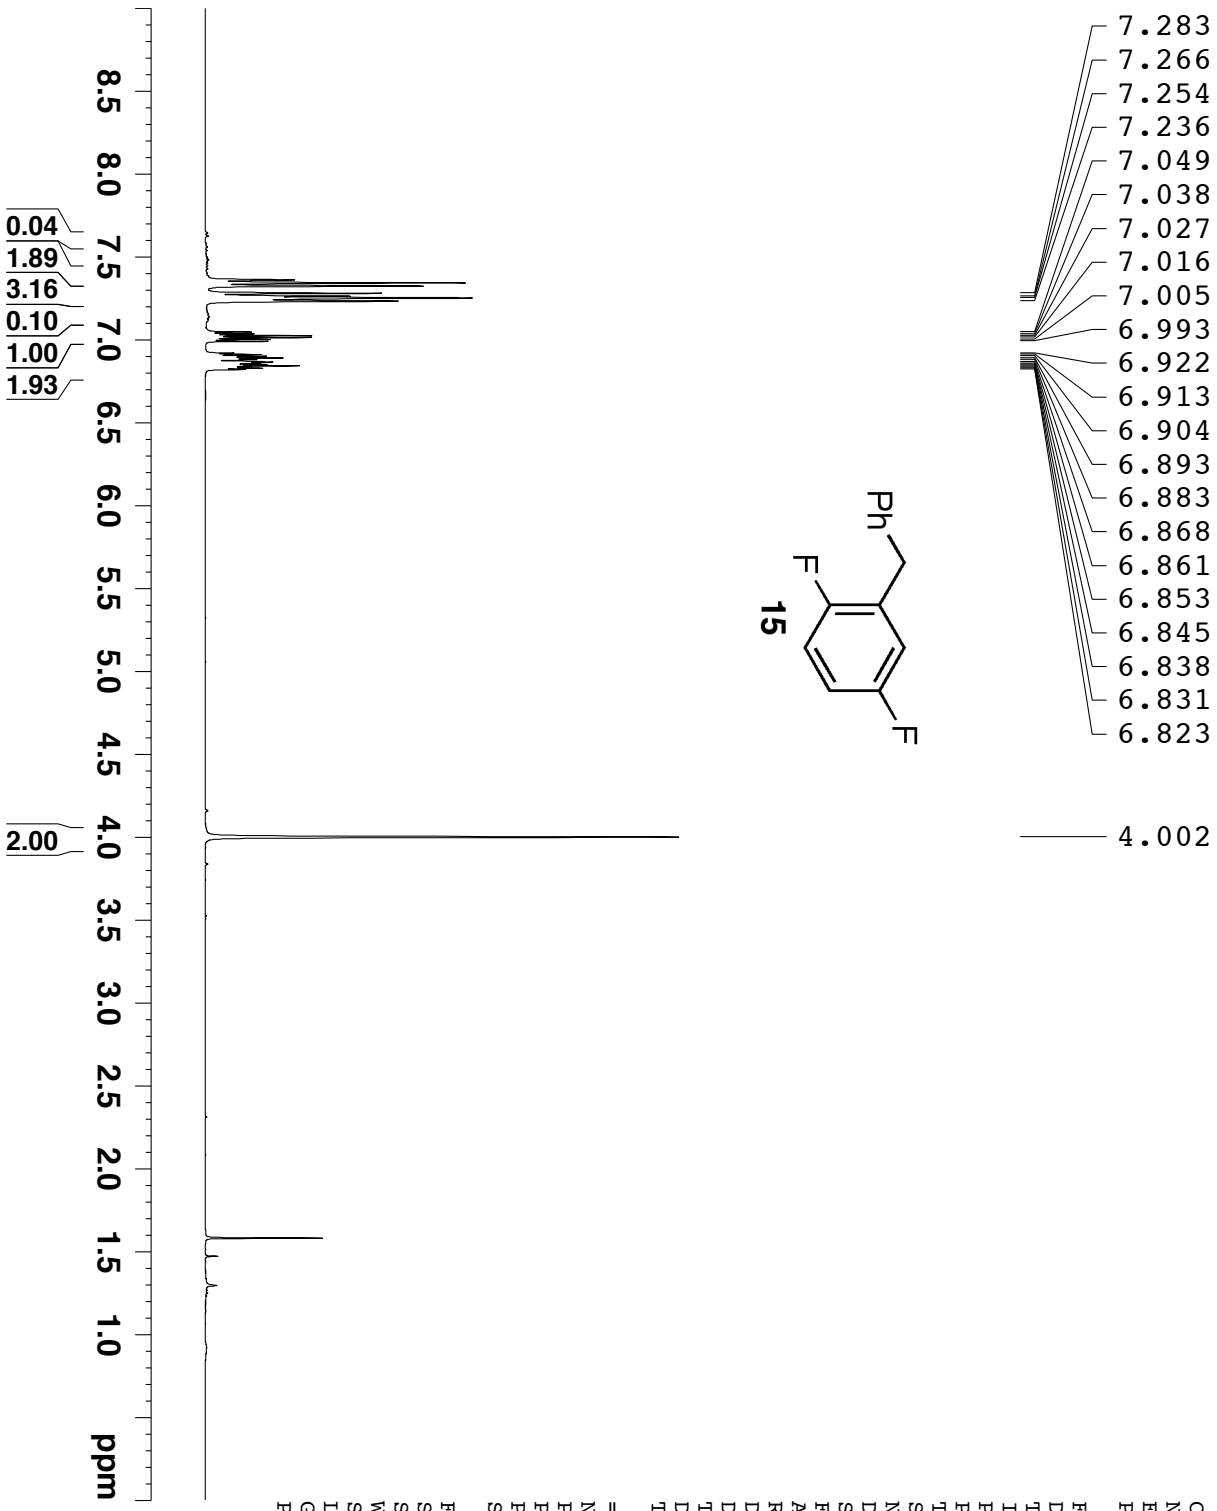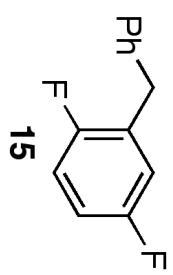

Compound 15, <sup>13</sup>CNMR

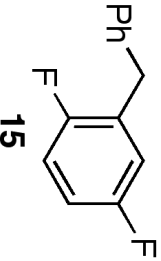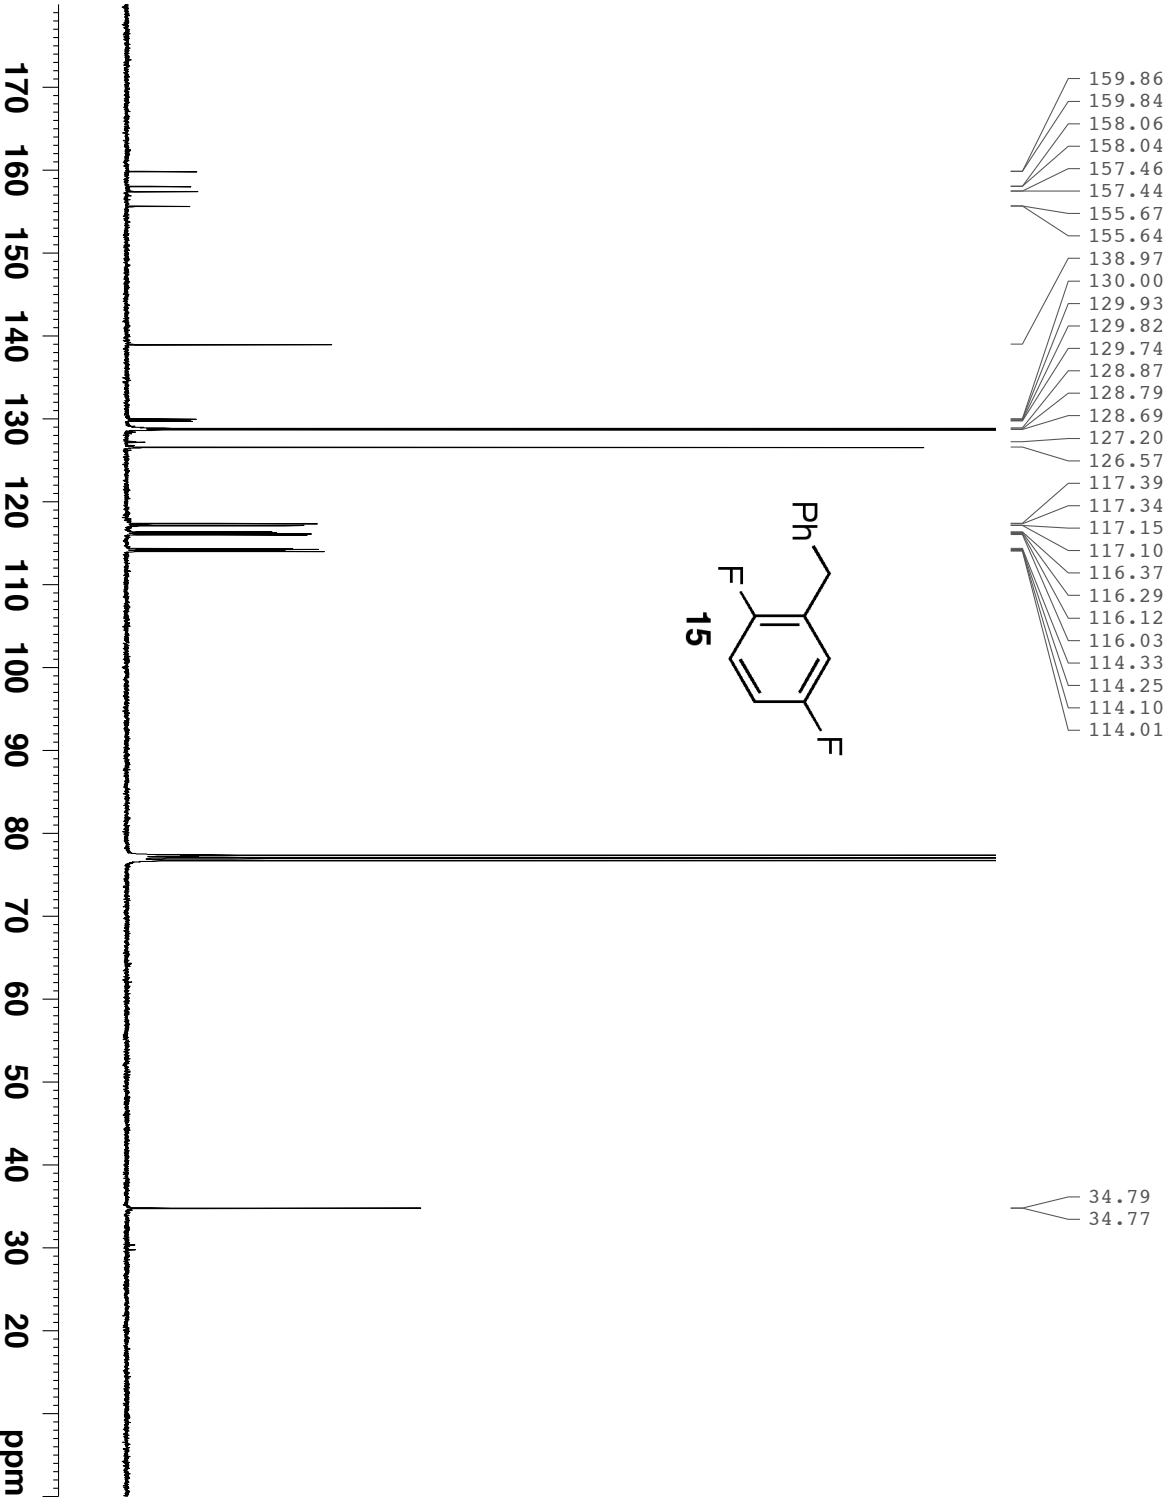

Current Data Parameters  
 NAME DM3-077-2-2  
 EXPNO 2  
 PROCNO 1

F2 - Acquisition Parameters  
 Date\_ 20120522  
 Time\_ 23.25

INSTRUM spect  
 PROBHD 5 mm CPQNP 1H/  
 PULPROG zgpg30  
 TD 65536  
 SOLVENT CDCl3  
 NS 256  
 DS 4

SWH 23980.814 Hz  
 FIDRES 0.365918 Hz  
 AQ 1.3664756 sec  
 RG 512  
 DW 20.850 usec  
 DE 18.00 usec  
 TE 298.2 K  
 D1 2.00000000 sec  
 D11 0.03000000 sec  
 TD0 1

==== CHANNEL f1 =====  
 NUC1 13C  
 P1 9.25 usec  
 PL1 0.55 dB  
 PL1W 35.18820572 W  
 SFO1 100.6228298 MHz

==== CHANNEL f2 =====  
 CPDPRG2 waltz16  
 NUC2 1H  
 PCPD2 90.00 usec  
 PL2 4.90 dB  
 PL12 20.46 dB  
 PL13 21.00 dB  
 PL12W 3.30822015 W  
 PL12W 0.09195905 W  
 PL13W 0.08120718 W  
 SFO2 400.1316005 MHz

F2 - Processing parameters  
 SI 32768  
 SF 100.6127690 MHz  
 WDW EM  
 SSB 0  
 LB 1.00 Hz  
 GB 0  
 PC 1.40

Compound 16, <sup>1</sup>H NMR



7.324  
7.304  
7.285  
7.229  
7.215  
7.210  
7.081  
7.060  
7.039  
6.653  
6.628  
6.622

3.952  
3.797

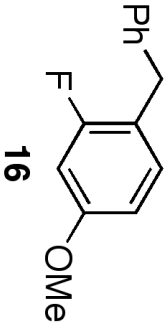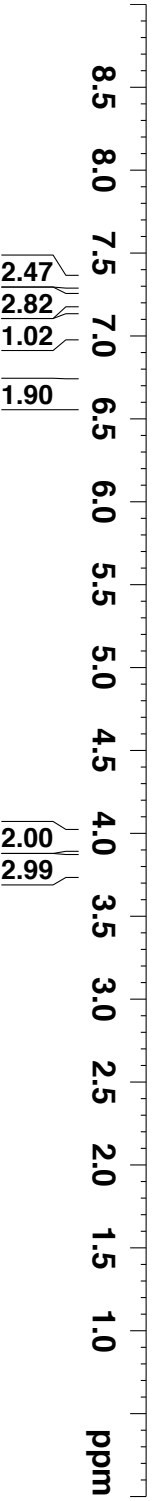

Current Data Parameters  
NAME PM-4, F&OMe-2  
EXPNO 1  
PROCNO 1

F2 - Acquisition Parameters  
Date\_ 20120807  
Time\_ 11.16  
INSTRUM spect  
PROBHD 5 mm CPQNP 1H/  
PULPROG zg30  
TD 65536  
SOLVENT CDCl3  
NS 16  
DS 2  
SWH 8278.146 Hz  
FIDRES 0.126314 Hz  
AQ 3.9584243 sec  
RG 12.7  
DW 60.400 usec  
DE 6.00 usec  
TE 298.1 K  
D1 1.00000000 sec  
TD0 1

==== CHANNEL f1 =====  
NUC1 1H  
P1 15.00 usec  
PL1 4.90 dB  
PL1W 3.30822015 W  
SFO1 400.1324710 MHz

F2 - Processing parameters  
SI 32768  
SF 400.1300000 MHz  
WDW EM  
SSB 0  
LB 0.30 Hz  
GB 0  
PC 1.00

Compound 16, <sup>13</sup>CNMR

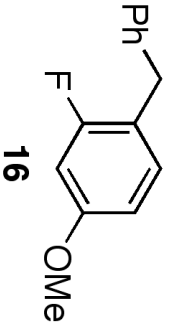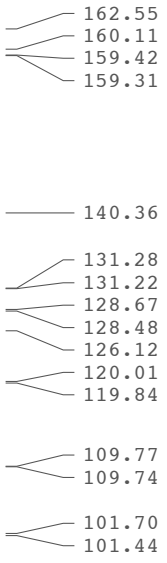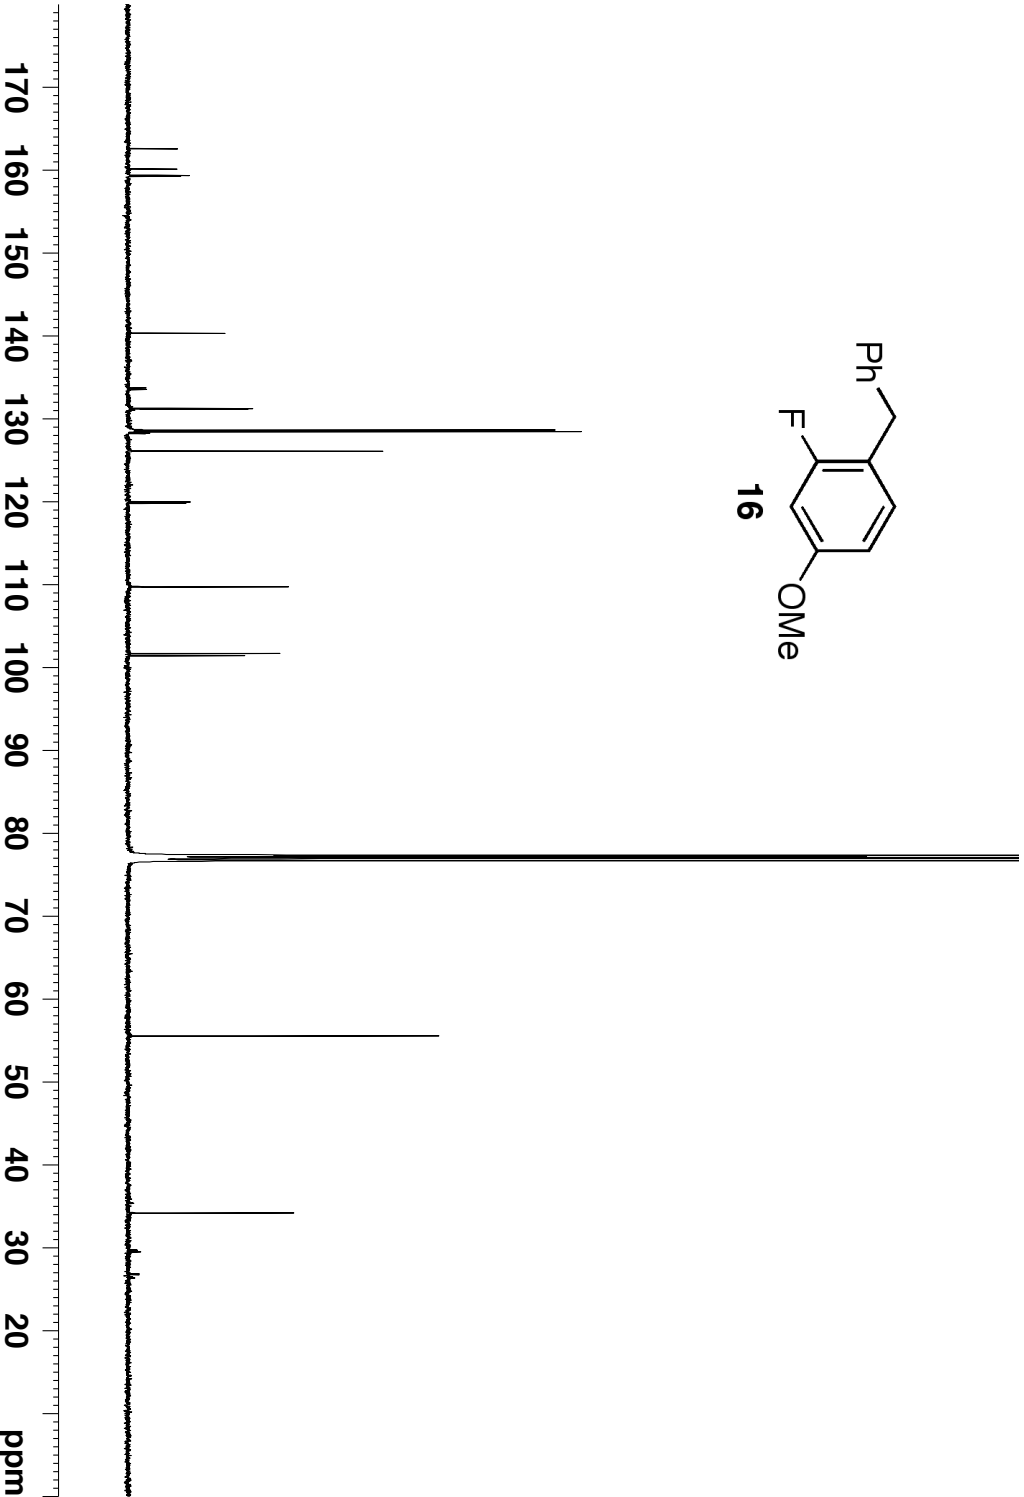

Current Data Parameters  
 NAME PM-4-of, POMe  
 EXPNO 1  
 PROCNO 1

F2 - Acquisition Parameters  
 Date\_ 20120811  
 Time\_ 22.24

INSTRUM spect  
 PROBD 5 mm CPQNP 1H/  
 PULPROG zgpg30  
 TD 65536  
 SOLVENT CDC13  
 NS 1024  
 DS 4  
 SWH 23980.814 Hz  
 FIDRES 0.365918 Hz  
 AQ 1.3664756 sec  
 RG 512  
 DW 20.850 usec  
 DE 18.00 usec  
 TE 298.2 K  
 D1 2.00000000 sec  
 D11 0.03000000 sec  
 TD0 1

==== CHANNEL F1 =====  
 NUC1 13C  
 P1 9.25 usec  
 PL1 0.55 dB  
 PL1W 35.18820572 W  
 SFO1 100.6228298 MHz

==== CHANNEL F2 =====  
 CPDPRG2 waltz16  
 NUC2 1H  
 PCPD2 90.00 usec  
 PL2 4.90 dB  
 PL12 20.46 dB  
 PL13 21.00 dB  
 PL12W 3.30822015 W  
 PL12W 0.09195905 W  
 PL13W 0.08120718 W  
 SFO2 400.1316005 MHz

F2 - Processing parameters  
 SI 32768  
 SF 100.6127690 MHz  
 WDW EM  
 SSB 0  
 LB 1.00 Hz  
 GB 0  
 PC 1.40



Compound 17, <sup>1</sup>H NMR



Current Data Parameters  
 NAME PM-4-13-3  
 EXPNO 1  
 PROCNO 1

F2 - Acquisition Parameters  
 Date\_ 20120705  
 Time\_ 5.19

INSTRUM spect  
 PROBHD 5 mm CPQNP 1H/  
 PULPROG zg30  
 TD 65536  
 SOLVENT CDCl3  
 NS 16  
 DS 2  
 SWH 8278.146 Hz  
 FIDRES 0.126314 Hz  
 AO 3.9584243 sec  
 RG 11.3  
 DW 60.400 usec  
 DE 6.00 usec  
 TE 298.2 K  
 D1 1.00000000 sec  
 TD0 1

==== CHANNEL f1 =====  
 NUC1 1H  
 P1 15.00 usec  
 PL1 4.90 dB  
 PL1W 3.30822015 W  
 SFO1 400.1324710 MHz

F2 - Processing parameters  
 SI 32768  
 SF 400.1300000 MHz  
 WDW EM  
 SSB 0  
 LB 0.30 Hz  
 GB 0  
 PC 1.00

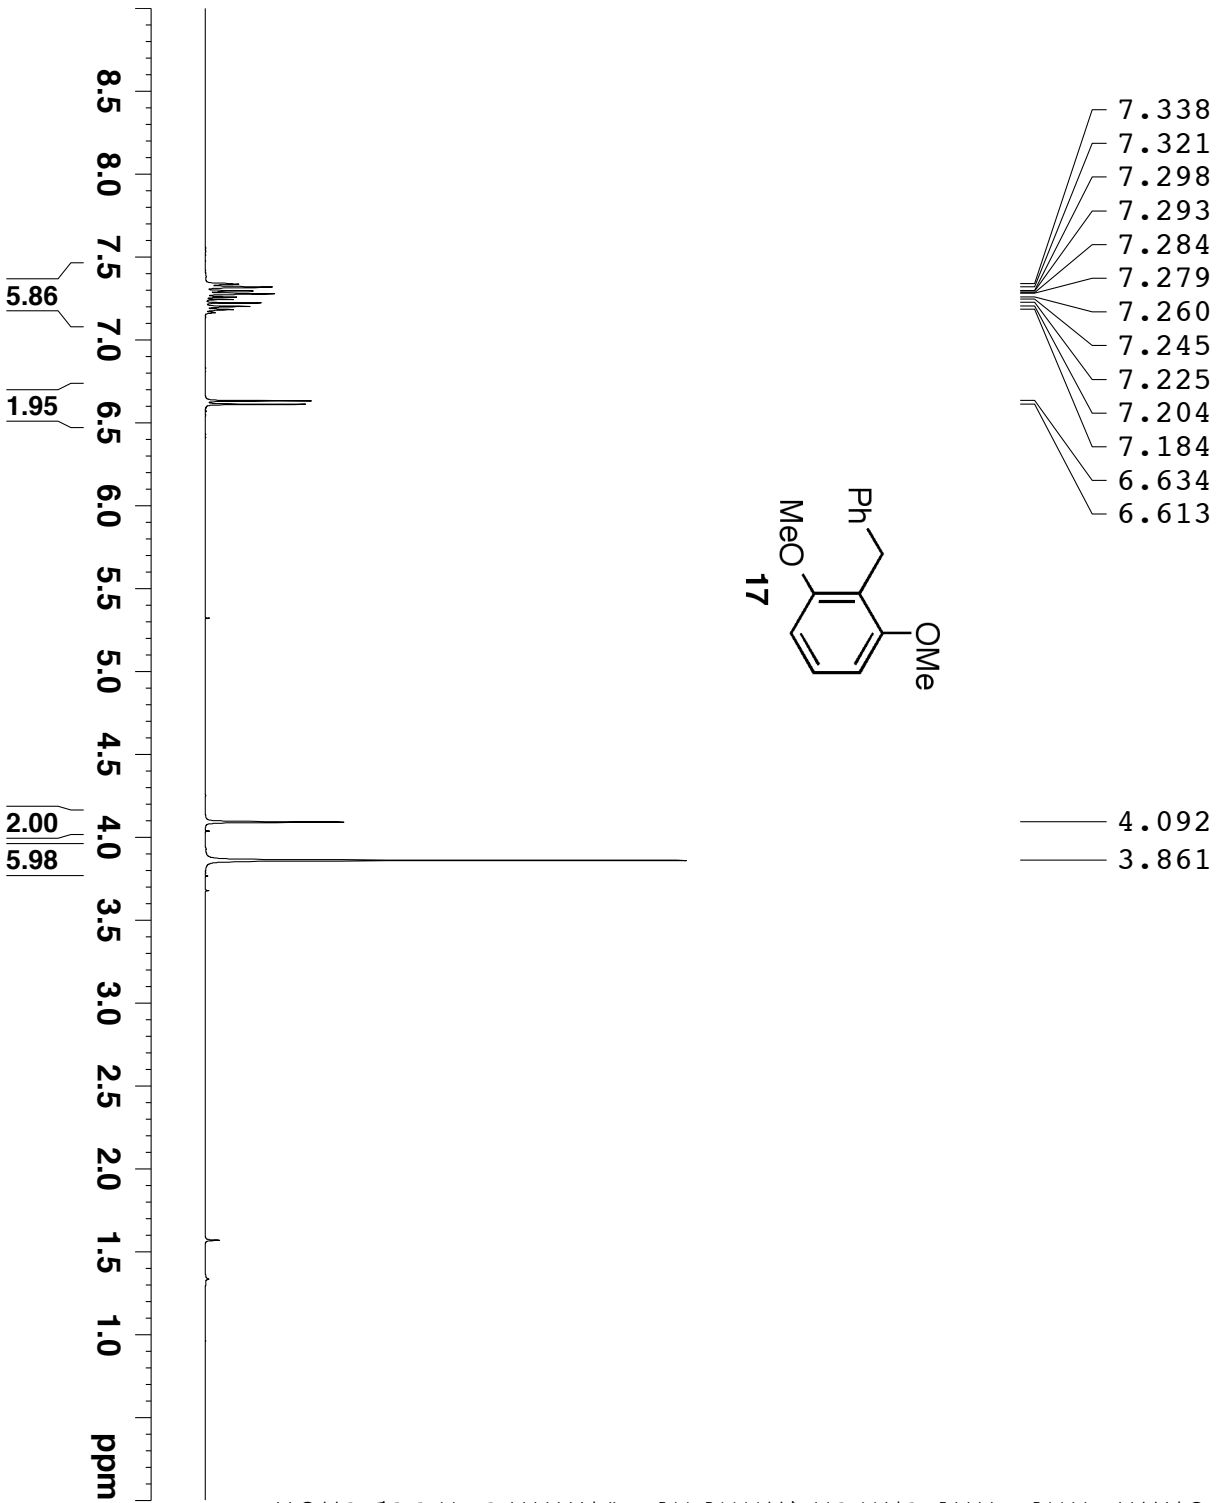

Compound 17, <sup>13</sup>CNMR



158.34  
141.86  
128.64  
128.02  
127.35  
125.39  
117.68  
103.81  
55.77  
28.68

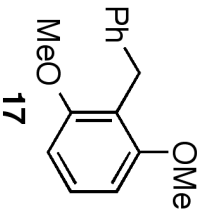

Current Data Parameters  
NAME PM-4-13-3  
EXPNO 2  
PROCNO 1

F2 - Acquisition Parameters  
Date\_ 20120705  
Time\_ 5.35

INSTRUM spect  
PROBHD 5 mm CPQNP 1H/  
PULPROG zgpg30  
TD 65536  
SOLVENT CDC13  
NS 256  
DS 4  
SWH 23980.814 Hz  
FIDRES 0.365918 Hz  
AQ 1.3664756 sec  
RG 512  
DW 20.850 usec  
DE 18.00 usec  
TE 298.2 K  
D1 2.00000000 sec  
D11 0.03000000 sec  
TD0 1

==== CHANNEL f1 =====  
NUC1 13C  
P1 9.25 usec  
PL1 0.55 dB  
PL1W 35.18820572 W  
SFO1 100.6228298 MHz

==== CHANNEL f2 =====  
CPDPRG2 waltz16  
NUC2 1H  
PCPD2 90.00 usec  
PL2 4.90 dB  
PL12 20.46 dB  
PL13 21.00 dB  
PL12W 3.30822015 W  
PL12W 0.09195905 W  
PL13W 0.08120718 W  
SFO2 400.1316005 MHz

F2 - Processing parameters  
SI 32768  
SF 100.6127690 MHz  
WDW EM  
SSB 0  
LB 1.00 Hz  
GB 0  
PC 1.40

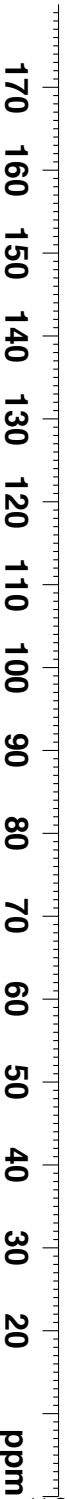

Compound 18, <sup>1</sup>H NMR



S71

Current Data Parameters  
 NAME DM3-104-2  
 EXPNO 1  
 PROCNO 1

F2 - Acquisition Parameters

Date\_ 20120706  
 Time\_ 16.57  
 INSTRUM spect  
 PROBHD 5 mm CPQNP 1H/  
 PULPROG zg30  
 TD 65536  
 SOLVENT CDCl3  
 NS 16  
 DS 2  
 SWH 8278.146 Hz  
 FIDRES 0.126314 Hz  
 AQ 3.9584243 sec  
 RG 10.1  
 DW 60.400 usec  
 DE 6.00 usec  
 TE 298.2 K  
 D1 1.00000000 sec  
 TD0 1

==== CHANNEL f1 =====  
 NUC1 1H  
 P1 15.00 usec  
 PL1 4.90 dB  
 PL1W 3.30822015 W  
 SFO1 400.1324710 MHz

F2 - Processing parameters  
 SI 32768  
 SF 400.1300000 MHz  
 WDW EM  
 SSB 0  
 LB 0.30 Hz  
 GB 0  
 PC 1.00

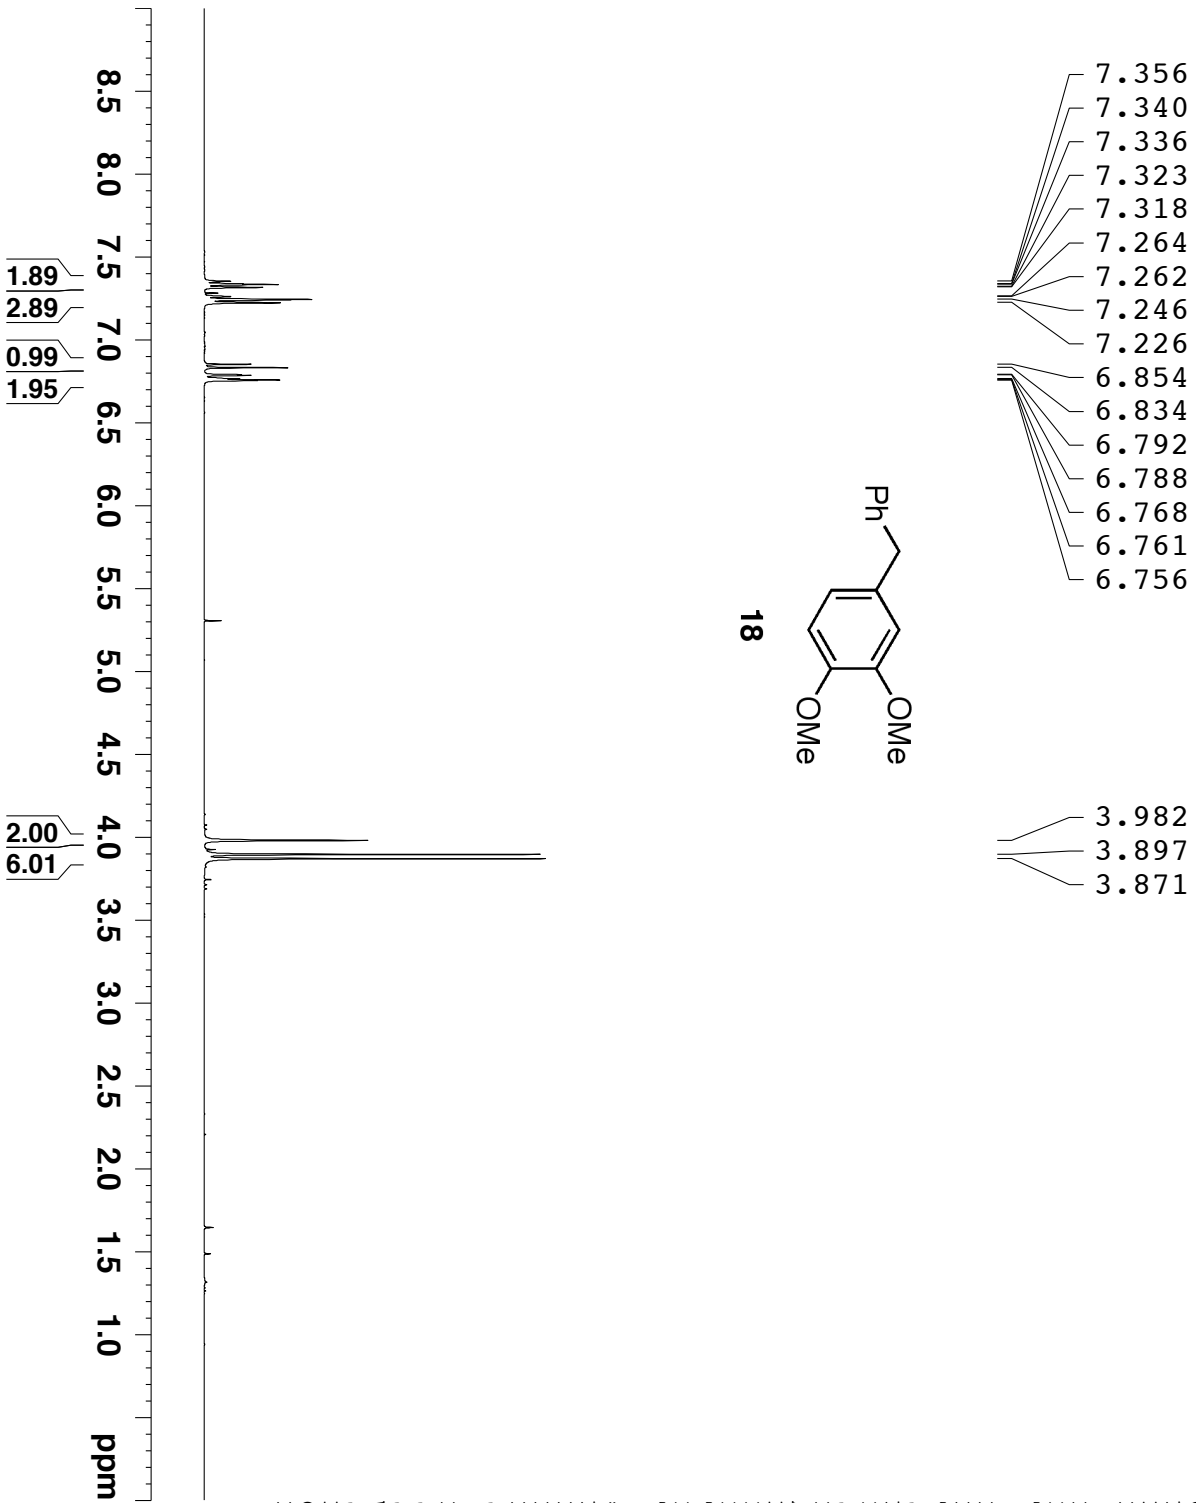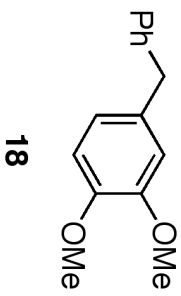

Compound 18, <sup>13</sup>CNMR

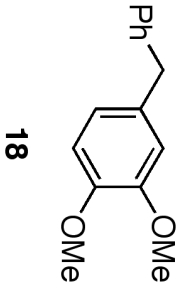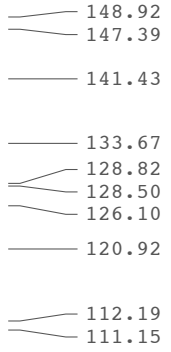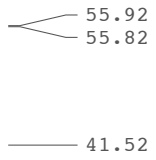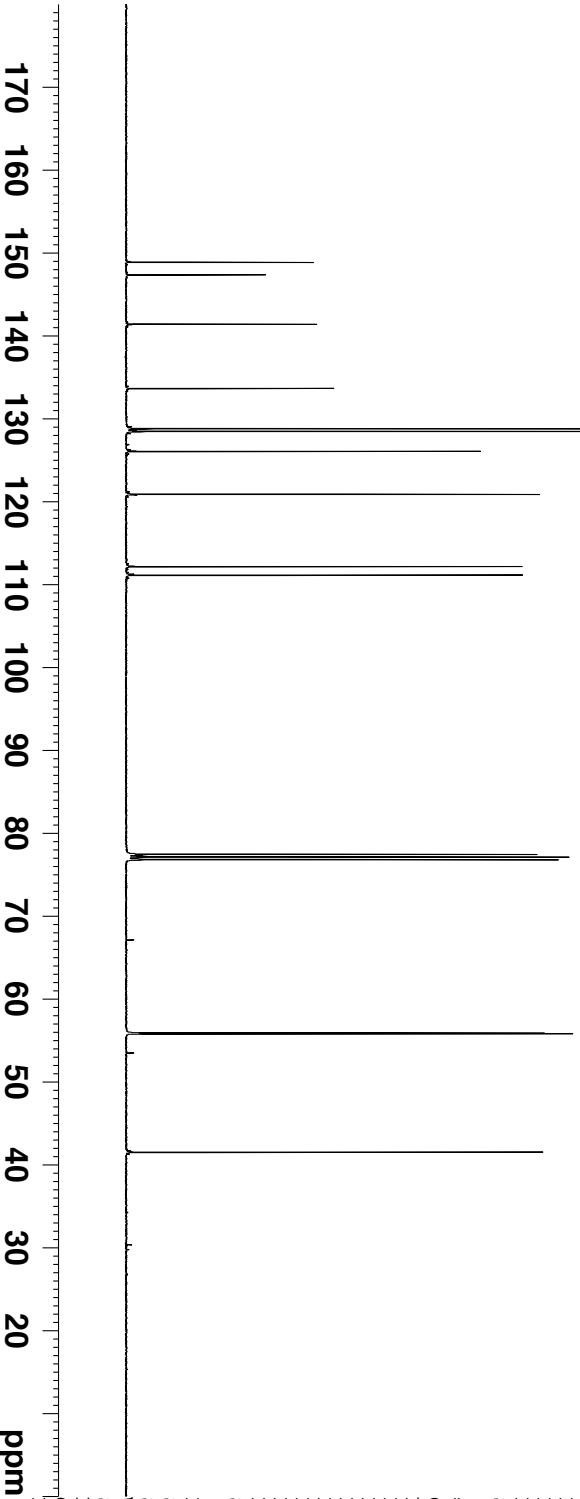

Current Data Parameters  
 NAME DM3-104-2  
 EXPNO 2  
 PROCNO 1

F2 - Acquisition Parameters  
 Date\_ 20120706  
 Time\_ 17.13  
 INSTRUM spect  
 PROBD 5 mm CPQNP 1H/  
 PULPROG zgpg30  
 TD 65536  
 SOLVENT CDC13  
 NS 256  
 DS 4  
 SWH 23980.814 Hz  
 FIDRES 0.365918 Hz  
 AQ 1.3664756 sec  
 RG 512  
 DW 20.850 usec  
 DE 18.00 usec  
 TE 298.2 K  
 D1 2.00000000 sec  
 D11 0.03000000 sec  
 TD0 1

==== CHANNEL F1 =====  
 NUC1 13C  
 P1 9.25 usec  
 PL1 0.55 dB  
 PL1W 35.18820572 W  
 SF01 100.6228298 MHz

==== CHANNEL F2 =====  
 CPDPRG2 waltz16  
 NUC2 1H  
 PCPD2 90.00 usec  
 PL2 4.90 dB  
 PL12 20.46 dB  
 PL13 21.00 dB  
 PL12W 3.30822015 W  
 PL12W 0.09195905 W  
 PL13W 0.08120718 W  
 SFO2 400.1316005 MHz

F2 - Processing parameters  
 SI 32768  
 SF 100.6127690 MHz  
 WDW EM  
 SSB 0  
 LB 1.00 Hz  
 GB 0  
 PC 1.40

Compound 19, <sup>1</sup>H NMR



Current Data Parameters  
 NAME PM-3-233-2A  
 EXPNO 1  
 PROCNO 1

F2 - Acquisition Parameters  
 Date\_ 20120515  
 Time\_ 23.40

INSTRUM spect  
 PROBHD 5 mm CPQNP 1H/  
 PULPROG zg30  
 TD 65536  
 SOLVENT CDCl3  
 NS 16  
 DS 2  
 SWH 8278.146 Hz  
 FIDRES 0.126314 Hz  
 AQ 3.9584243 sec  
 RG 9  
 DW 60.400 usec  
 DE 6.00 usec  
 TE 298.2 K  
 D1 1.00000000 sec  
 TD0 1

==== CHANNEL f1 =====  
 NUC1 1H  
 P1 15.00 usec  
 PL1 4.90 dB  
 PL1W 3.30822015 W  
 SFO1 400.1324710 MHz

F2 - Processing parameters  
 SI 32768  
 SF 400.1300000 MHz  
 WDW EM  
 SSB 0  
 LB 0.30 Hz  
 GB 0  
 PC 1.00

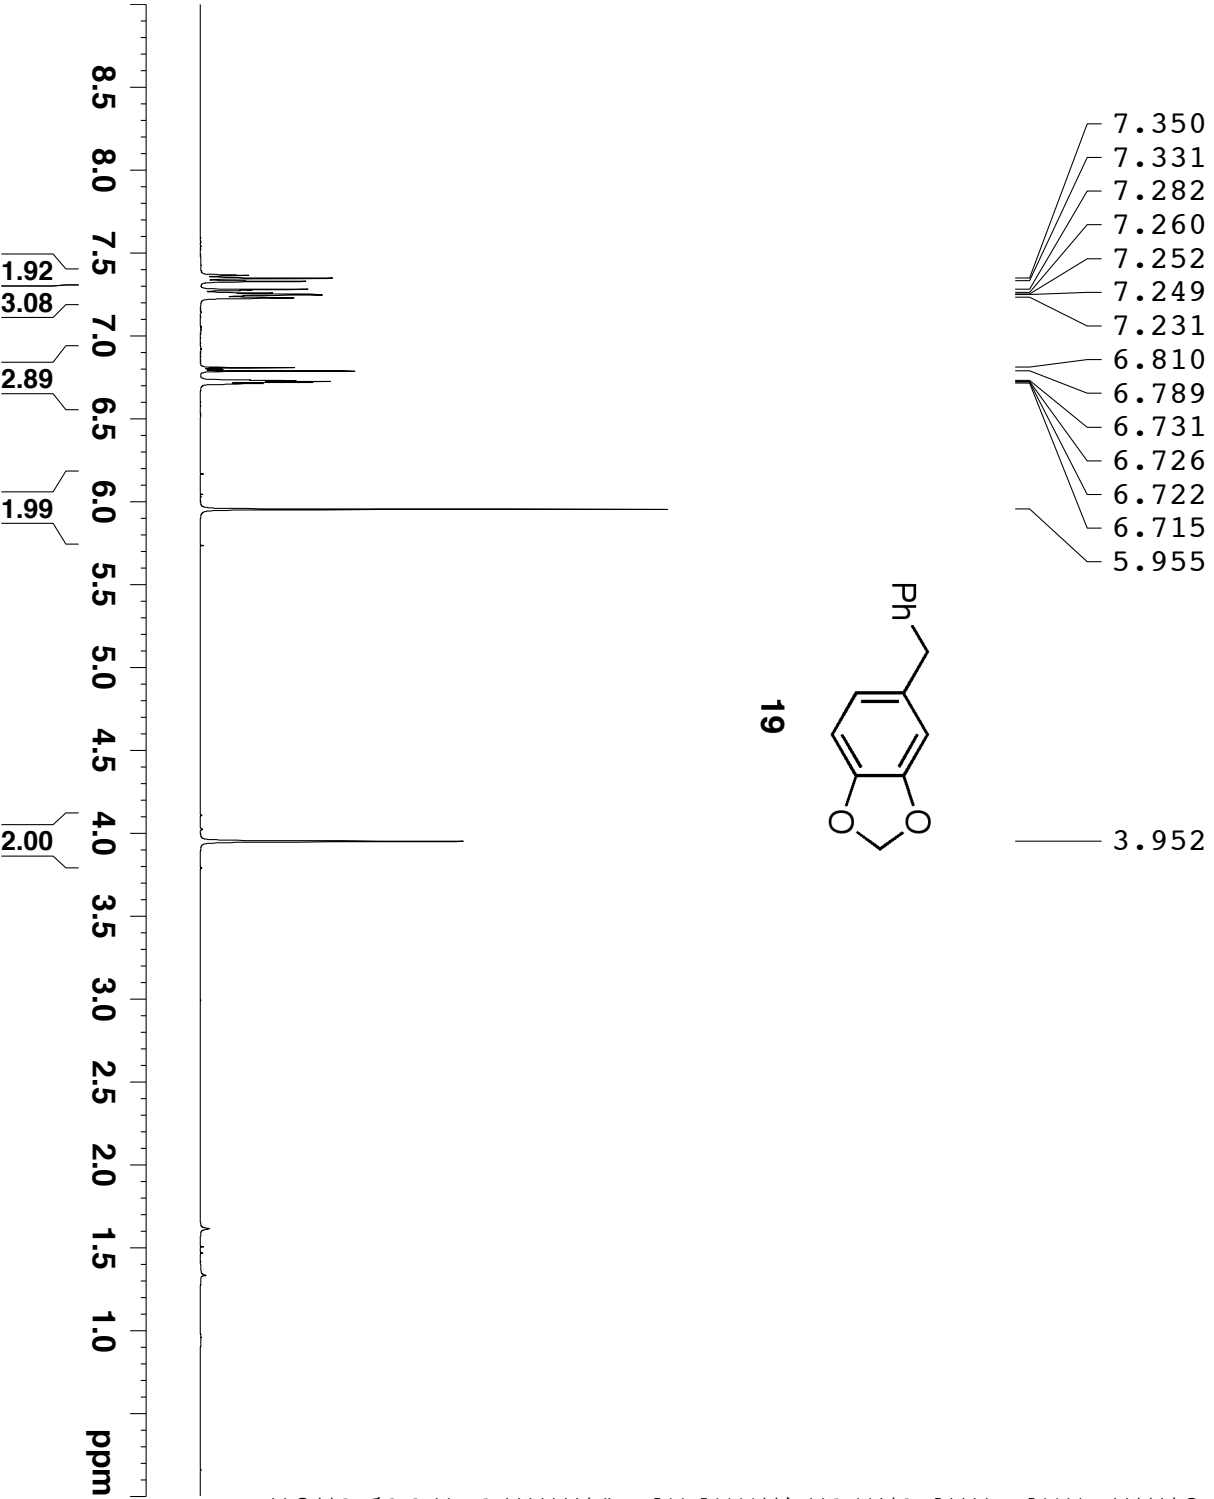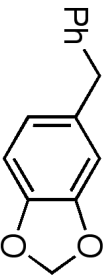

19

Compound 19, <sup>13</sup>CNMR

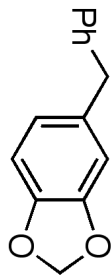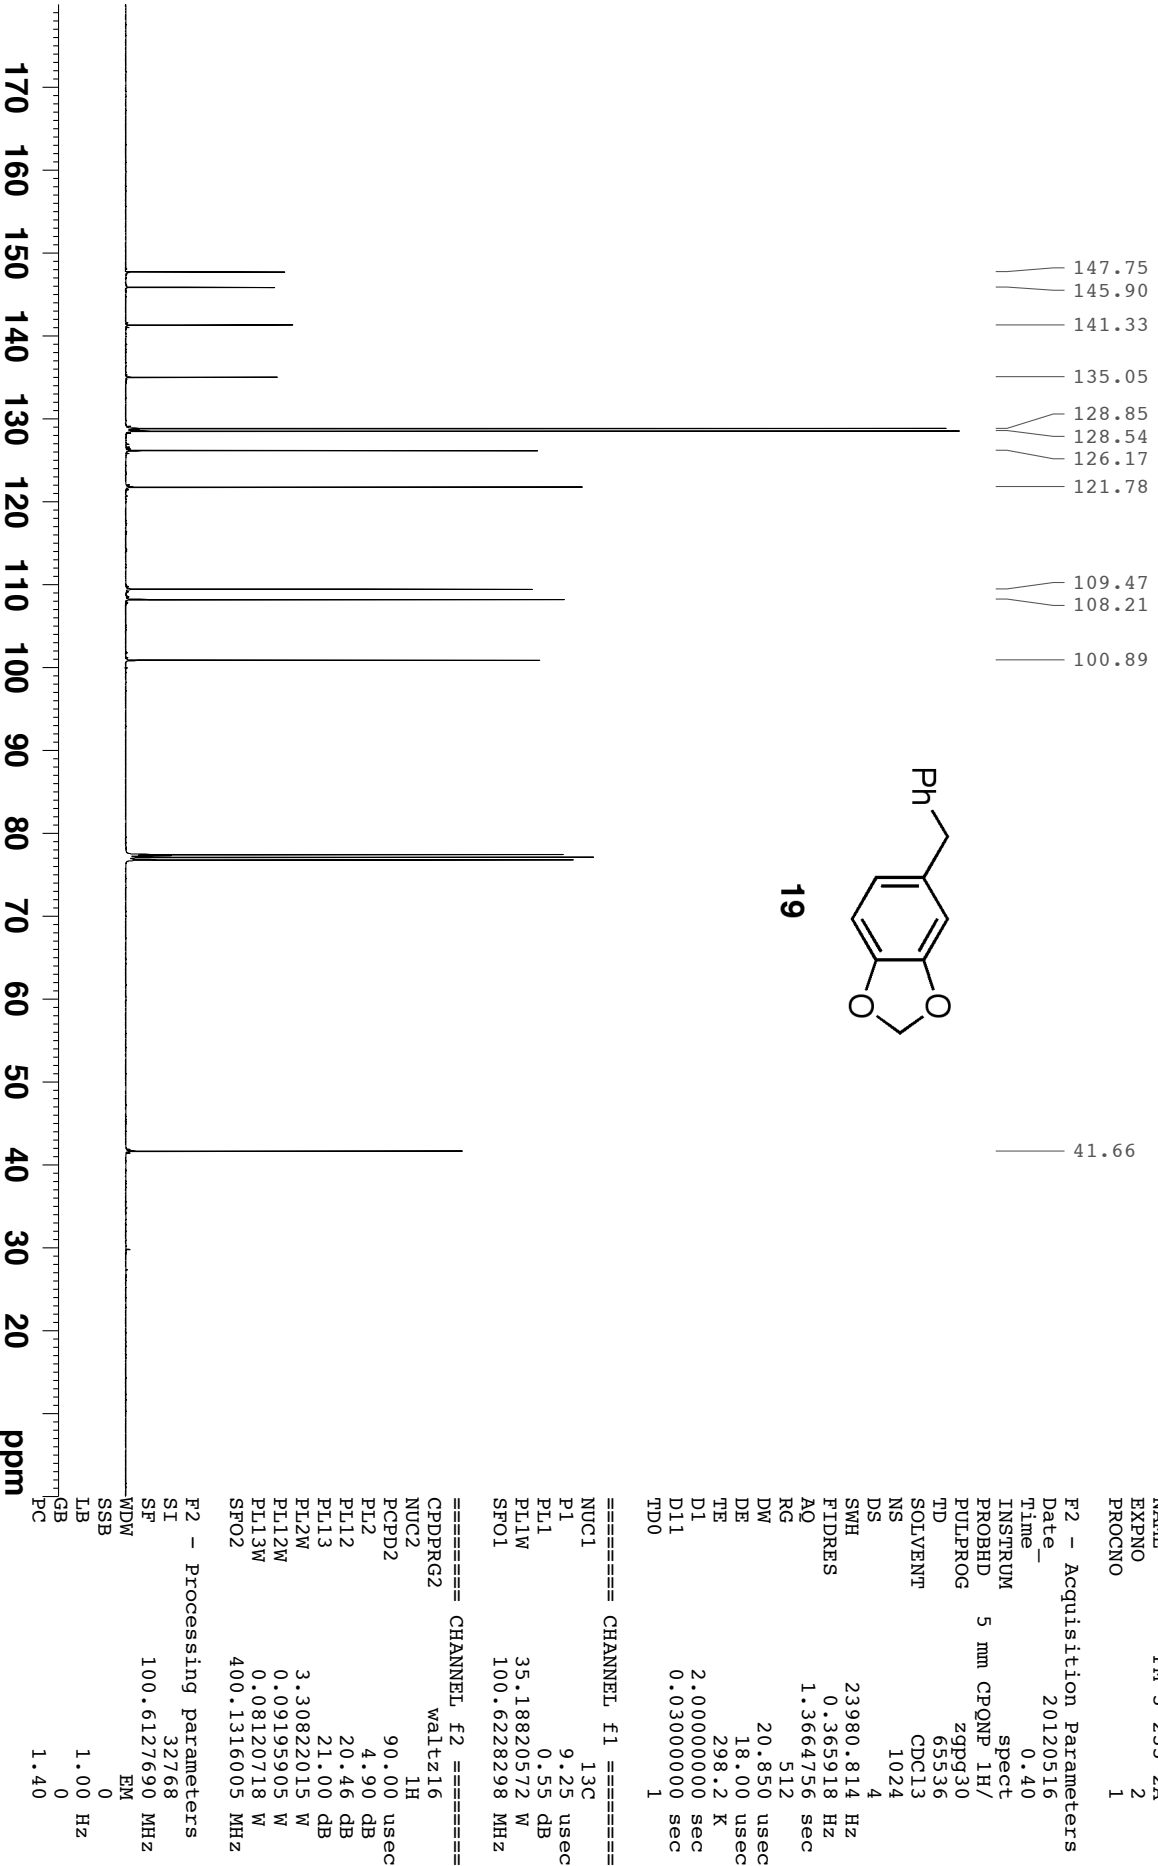

Compound 20, <sup>1</sup>H NMR



7.515  
7.507  
7.501  
7.495  
7.487  
7.483  
7.470  
7.396  
7.392  
7.383  
7.375  
7.371  
7.364  
7.351  
7.346  
7.308  
7.291  
7.282  
7.278  
7.261

4.209

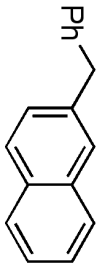

20

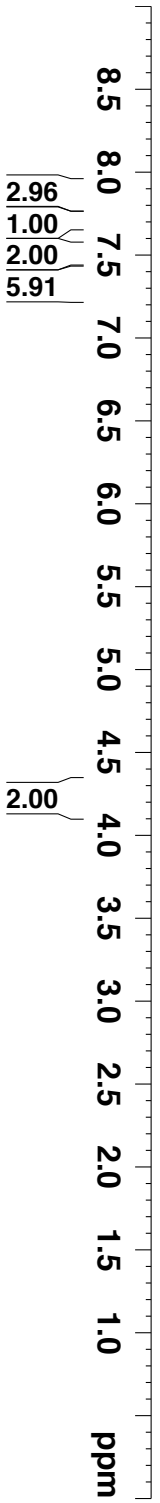

Current Data Parameters  
NAME DMM3-075-1-pure  
EXPNO 1  
PROCNO 1

F2 - Acquisition Parameters  
Date\_ 20120520  
Time\_ 13.43  
INSTRUM spect  
PROBHD 5 mm CPQNP 1H/  
PULPROG zg30  
TD 65536  
SOLVENT CDCl3  
NS 16  
DS 2  
SWH 8278.146 Hz  
FIDRES 0.126314 Hz  
AQ 3.9584243 sec  
RG 14.3  
DW 60.400 usec  
DE 6.00 usec  
TE 298.2 K  
D1 1.00000000 sec  
TD0 1

==== CHANNEL f1 =====  
NUC1 1H  
P1 15.00 usec  
PL1 4.90 dB  
PL1W 3.30822015 W  
SFO1 400.1324710 MHz

F2 - Processing parameters  
SI 32768  
SF 400.1300000 MHz  
WDW EM  
SSB 0  
LB 0.30 Hz  
GB 0  
PC 1.00

Compound 20, <sup>13</sup>CNMR

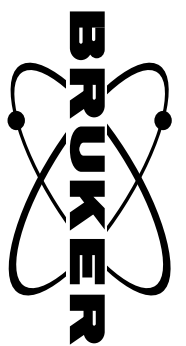

- 141.04
- 138.66
- 133.65
- 132.12
- 129.10
- 128.57
- 128.15
- 127.71
- 127.69
- 127.62
- 127.16
- 126.22
- 126.05
- 125.42

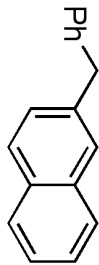

20

- 42.16

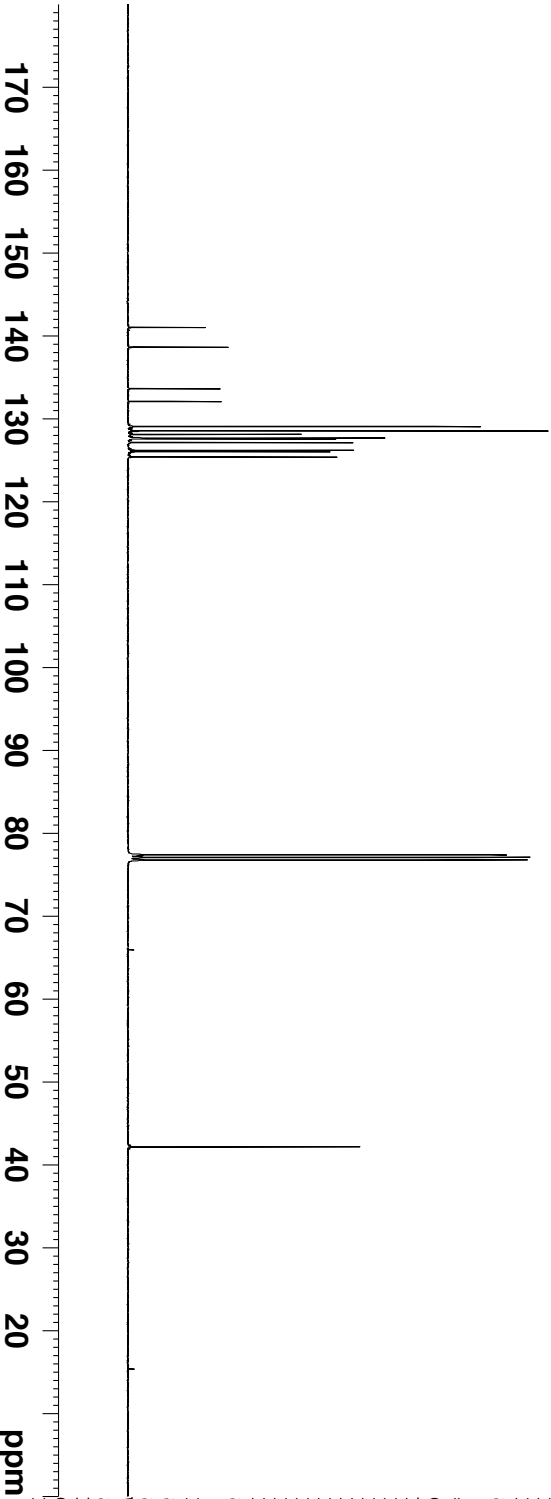

Current Data Parameters  
 NAME DM3-075-1-pure  
 EXPNO 2  
 PROCNO 1

F2 - Acquisition Parameters  
 Date\_ 20120520  
 Time\_ 13.59

INSTRUM spect  
 PROBHD 5 mm CPQNP 1H/  
 PULPROG zgpg30  
 TD 65536  
 SOLVENT CDC13  
 NS 256  
 DS 4

SWH 23980.814 Hz  
 FIDRES 0.365918 Hz  
 AQ 1.3664756 sec  
 RG 512  
 DW 20.850 usec  
 DE 18.00 usec  
 TE 298.1 K  
 D1 2.00000000 sec  
 D11 0.03000000 sec  
 TD0 1

==== CHANNEL f1 =====  
 NUC1 13C  
 P1 9.25 usec  
 PL1 0.55 dB  
 PL1W 35.18820572 W  
 SF01 100.6228298 MHz

==== CHANNEL f2 =====  
 CPDPRG2 waltz16  
 NUC2 1H  
 PCPD2 90.00 usec  
 PL2 4.90 dB  
 PL12 20.46 dB  
 PL13 21.00 dB  
 PL12W 3.30822015 W  
 PL12W 0.09195905 W  
 PL13W 0.08120718 W  
 SF02 400.1316005 MHz

F2 - Processing parameters  
 SI 32768  
 SF 100.6127690 MHz  
 WDW EM  
 SSB 0  
 LB 1.00 Hz  
 GB 0  
 PC 1.40



Compound 21, <sup>1</sup>H NMR



7.351  
7.347  
7.332  
7.322  
7.313  
7.307  
7.293  
7.291  
7.289  
7.284  
7.266  
7.254  
7.249  
7.235  
6.840  
6.827  
6.822  
6.809

4.003  
3.953

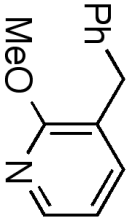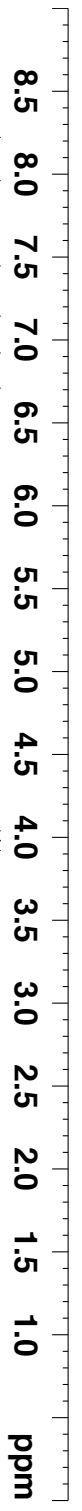

Current Data Parameters  
NAME PM-4-10-5  
EXPNO 1  
PROCNO 1

F2 - Acquisition Parameters  
Date\_ 20120705  
Time\_ 4.35  
INSTRUM spect  
PROBHD 5 mm CPQNP 1H/  
PULPROG zg30  
TD 65536  
SOLVENT CDCl3  
NS 16  
DS 2  
SWH 8278.146 Hz  
FIDRES 0.126314 Hz  
AQ 3.9584243 sec  
RG 10.1  
DW 60.400 usec  
DE 6.00 usec  
TE 298.2 K  
D1 1.00000000 sec  
TD0 1

==== CHANNEL f1 =====  
NUC1 1H  
P1 15.00 usec  
PL1 4.90 dB  
PL1W 3.30822015 W  
SFO1 400.1324710 MHz

F2 - Processing parameters  
SI 32768  
SF 400.1300000 MHz  
WDW EM  
SSB 0  
LB 0.30 Hz  
GB 0  
PC 1.00

Compound 21, <sup>13</sup>CNMR

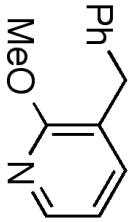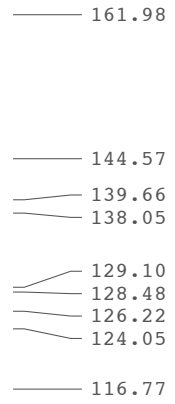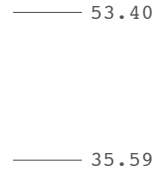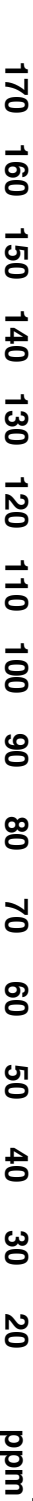

Current Data Parameters  
 NAME PM-4-10-5  
 EXPNO 2  
 PROCNO 1

F2 - Acquisition Parameters  
 Date\_ 20120705  
 Time\_ 4.51

INSTRUM spect  
 PROBHD 5 mm CPQNP 1H/  
 PULPROG zgpg30  
 TD 65536  
 SOLVENT CDC13  
 NS 256  
 DS 4  
 SWH 23980.814 Hz  
 FIDRES 0.365918 Hz  
 AQ 1.3664756 sec  
 RG 512  
 DW 20.850 usec  
 DE 18.00 usec  
 TE 298.1 K  
 D1 2.00000000 sec  
 D11 0.03000000 sec  
 TD0 1

==== CHANNEL F1 =====  
 NUC1 13C  
 P1 9.25 usec  
 PL1 0.55 dB  
 PL1W 35.18820572 W  
 SF01 100.6228298 MHz

==== CHANNEL F2 =====  
 CPDPRG2 waltz16  
 NUC2 1H  
 PCPD2 90.00 usec  
 PL2 4.90 dB  
 PL12 20.46 dB  
 PL13 21.00 dB  
 PL2W 3.30822015 W  
 PL12W 0.09195905 W  
 PL13W 0.08120718 W  
 SFO2 400.1316005 MHz

F2 - Processing parameters  
 SI 32768  
 SF 100.6127690 MHz  
 WDW EM  
 SSB 0  
 LB 1.00 Hz  
 GB 0  
 PC 1.40

Compound 22, <sup>1</sup>H NMR



Current Data Parameters  
 NAME PM-3-249-1-1  
 EXPNO 1  
 PROCNO 1

8.126  
 8.121  
 7.353  
 7.347  
 7.331  
 7.325  
 7.307  
 7.285  
 7.238  
 7.220  
 7.201  
 7.183  
 6.621  
 6.599

3.886  
 3.858  
 3.846  
 3.834  
 3.494  
 3.481  
 3.470

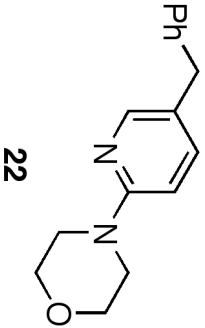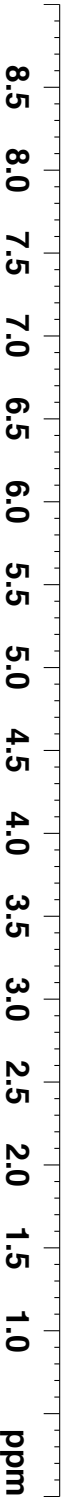

F2 - Acquisition Parameters

Date\_ 20120812  
 Time\_ 13.35  
 INSTRUM spect  
 PROBHD 5 mm CPQNP 1H/  
 PULPROG zg30  
 TD 65536  
 SOLVENT CDCl3  
 NS 16  
 DS 2  
 SWH 8278.146 Hz  
 FIDRES 0.126314 Hz  
 AQ 3.9584243 sec  
 RG 4  
 DW 60.400 usec  
 DE 6.00 usec  
 TE 298.2 K  
 D1 1.00000000 sec  
 TD0 1

==== CHANNEL f1 =====  
 NUC1 1H  
 P1 15.00 usec  
 PL1 4.90 dB  
 PL1W 3.30822015 W  
 SFO1 400.1324710 MHz

F2 - Processing parameters

SI 32768  
 SF 400.1300000 MHz  
 WDW EM  
 SSB 0  
 LB 0.30 Hz  
 GB 0  
 PC 1.00

Compound 22, <sup>13</sup>CNMR

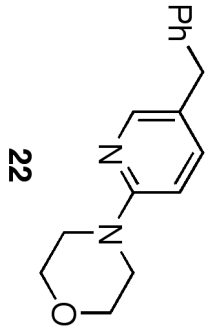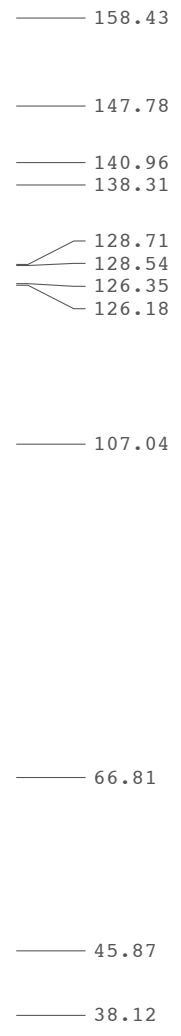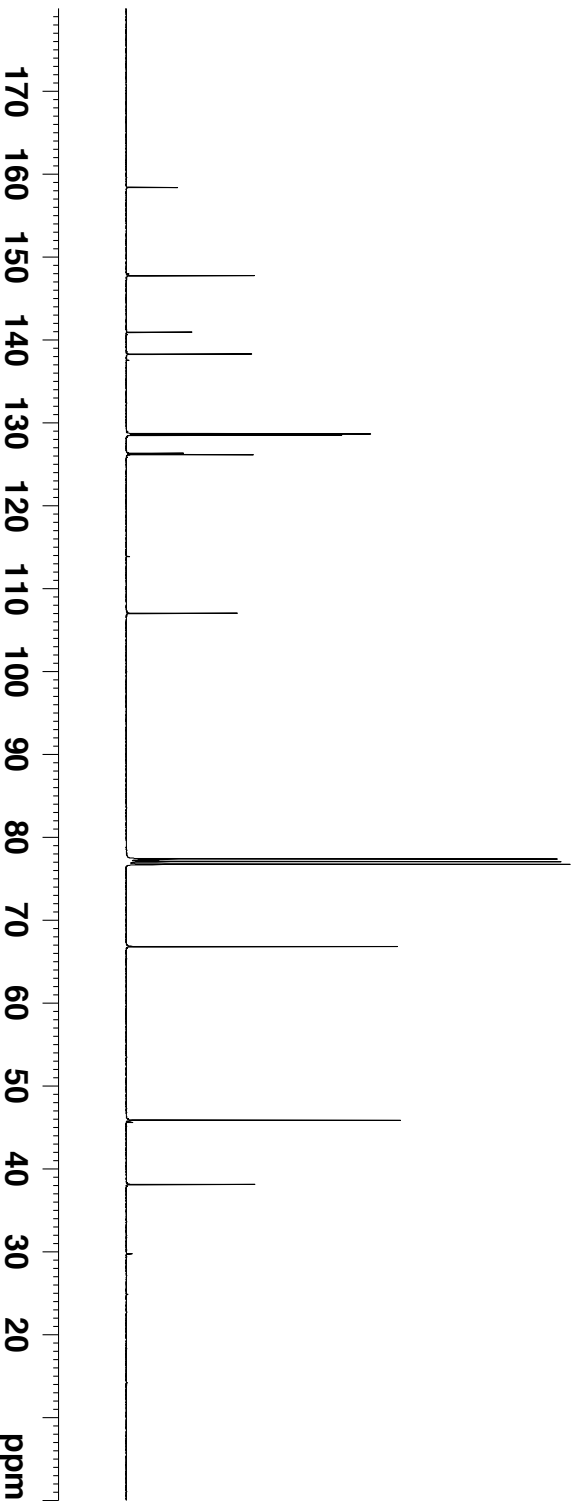

Current Data Parameters  
 NAME PM-3-249-1  
 EXPNO 1  
 PROCNO 1

F2 - Acquisition Parameters  
 Date\_ 20120506  
 Time\_ 23.56  
 INSTRUM spect  
 PROBHD 5 mm CPQNP 1H/  
 PULPROG zgpg30  
 TD 65536  
 SOLVENT CDC13  
 NS 1024  
 DS 4  
 SWH 23980.814 Hz  
 FIDRES 0.365918 Hz  
 AQ 1.3664756 sec  
 RG 512  
 DW 20.850 usec  
 DE 18.00 usec  
 TE 298.2 K  
 D1 2.00000000 sec  
 D11 0.03000000 sec  
 TD0 1

==== CHANNEL F1 =====  
 NUC1 13C  
 P1 9.25 usec  
 PL1 0.55 dB  
 PL1W 35.18820572 W  
 SF01 100.6228298 MHz

==== CHANNEL F2 =====  
 CPDPRG2 waltz16  
 NUC2 1H  
 PCPD2 90.00 usec  
 PL2 4.90 dB  
 PL12 20.46 dB  
 PL13 21.00 dB  
 PL12W 3.30822015 W  
 PL12W 0.09195905 W  
 PL13W 0.08120718 W  
 SF02 400.1316005 MHz

F2 - Processing parameters  
 SI 32768  
 SF 100.6127690 MHz  
 WDW EM  
 SSB 0  
 LB 1.00 Hz  
 GB 0  
 PC 1.40

Compound 23, <sup>1</sup>H NMR



Current Data Parameters  
 NAME PM-4-13-1  
 EXPNO 1  
 PROCNO 1

F2 - Acquisition Parameters  
 Date\_ 20120705  
 Time\_ 4.57  
 INSTRUM spect  
 PROBHD 5 mm CPQNP 1H/  
 PULPROG zg30  
 TD 65536  
 SOLVENT CDCl3  
 NS 16  
 DS 2  
 SWH 8278.146 Hz  
 FIDRES 0.126314 Hz  
 AQ 3.9584243 sec  
 RG 12.7  
 DW 60.400 usec  
 DE 6.00 usec  
 TE 298.2 K  
 D1 1.00000000 sec  
 TD0 1

==== CHANNEL f1 =====  
 NUC1 1H  
 P1 15.00 usec  
 PL1 4.90 dB  
 PL1W 3.30822015 W  
 SFO1 400.1324710 MHz

F2 - Processing parameters  
 SI 32768  
 SF 400.1300000 MHz  
 WDW EM  
 SSB 0  
 LB 0.30 Hz  
 GB 0  
 PC 1.00

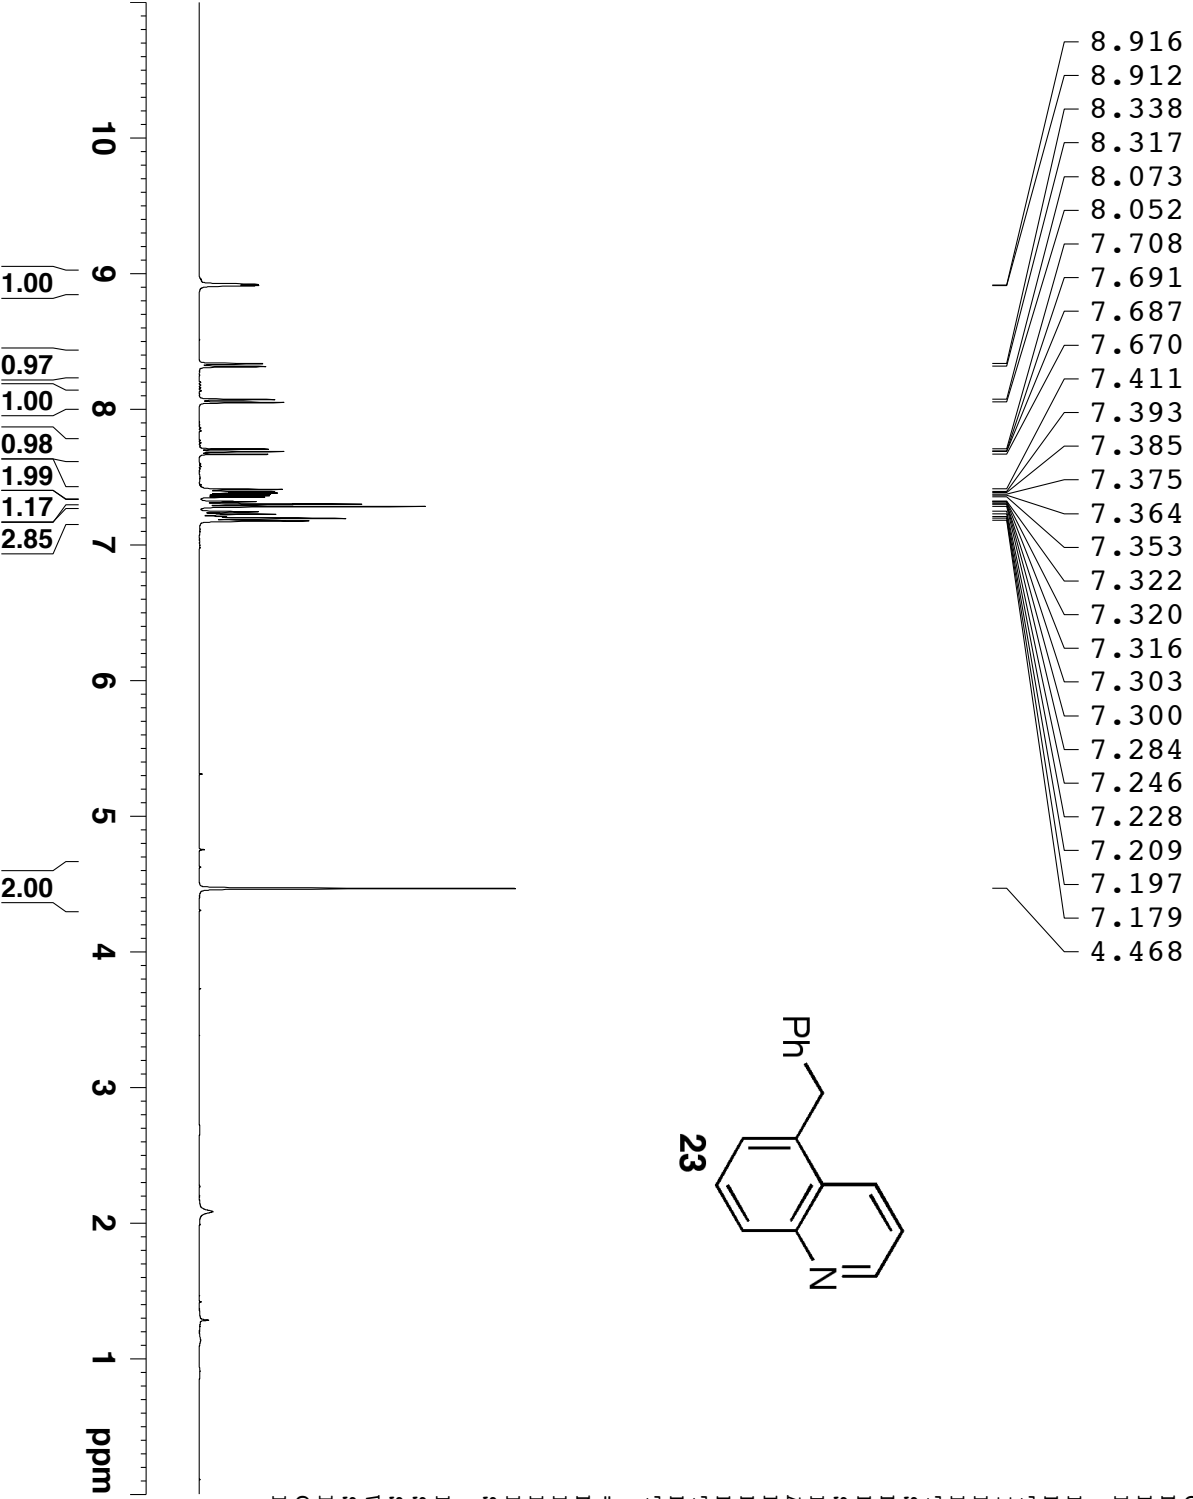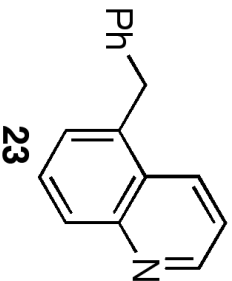

Compound 23, <sup>13</sup>CNMR

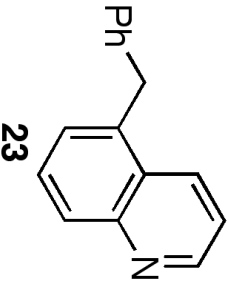

- 150.02
- 148.87
- 140.11
- 137.03
- 132.71
- 129.20
- 128.62
- 128.59
- 127.85
- 127.24
- 126.35
- 120.95

38.52

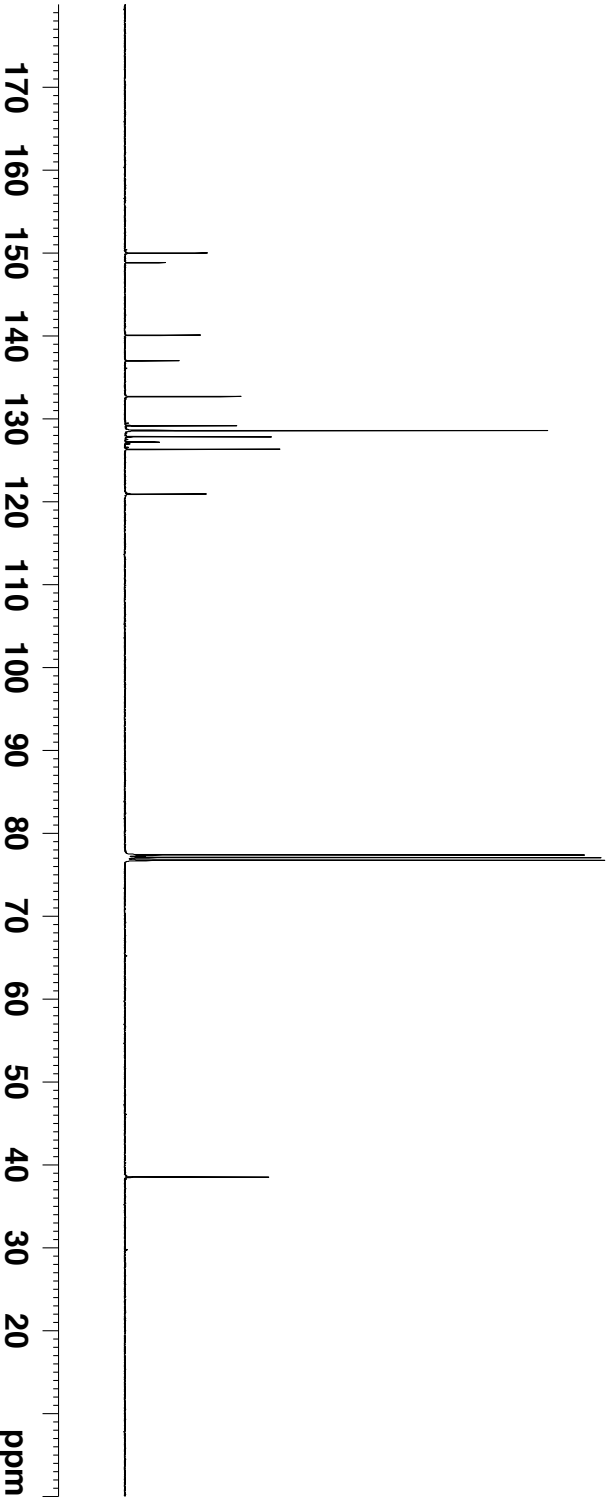

Current Data Parameters  
 NAME PM-4-13-1  
 EXPNO 2  
 PROCNO 1

F2 - Acquisition Parameters  
 Date\_ 20120705  
 Time\_ 5.13  
 INSTRUM spect  
 PROBHD 5 mm CPQNP 1H/  
 PULPROG zgpg30  
 TD 65536  
 SOLVENT CDCl3  
 NS 256  
 DS 4  
 SWH 23980.814 Hz  
 FIDRES 0.365918 Hz  
 AQ 1.3664756 sec  
 RG 512  
 DW 20.850 usec  
 DE 18.00 usec  
 TE 298.2 K  
 D1 2.00000000 sec  
 D11 0.03000000 sec  
 TD0 1

==== CHANNEL f1 =====  
 NUC1 13C  
 P1 9.25 usec  
 PL1 0.55 dB  
 PL1W 35.18820572 W  
 SF01 100.6228298 MHz

==== CHANNEL f2 =====  
 CPDPRG2 waltz16  
 NUC2 1H  
 PCPD2 90.00 usec  
 PL2 4.90 dB  
 PL12 20.46 dB  
 PL13 21.00 dB  
 PL2W 3.30822015 W  
 PL12W 0.09195905 W  
 PL13W 0.08120718 W  
 SF02 400.1316005 MHz

F2 - Processing parameters  
 SI 32768  
 SF 100.6127690 MHz  
 WDW EM  
 SSB 0  
 LB 1.00 Hz  
 GB 0  
 PC 1.40

Compound 24, <sup>1</sup>H NMR



Current Data Parameters  
 NAME DM3-111-4  
 EXPNO 1  
 PROCNO 1

7.145  
 7.123  
 6.880  
 6.858

3.910  
 3.819

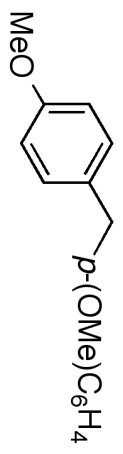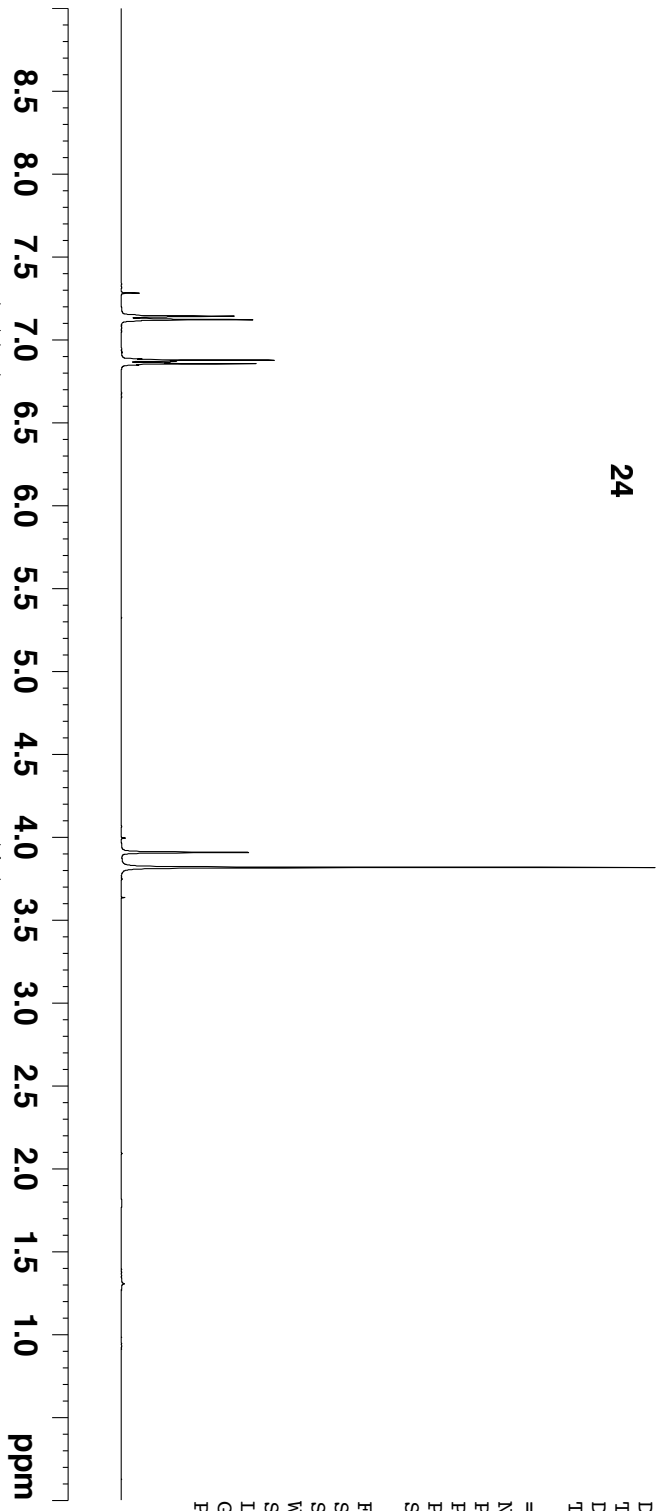

3.85  
 3.87

2.00  
 5.93

F2 - Acquisition Parameters  
 Date\_ 20120714  
 Time\_ 12.04  
 INSTRUM spect  
 PROBHD 5 mm CPQNP 1H/  
 PULPROG zg30  
 TD 65536  
 SOLVENT CDCl3  
 NS 16  
 DS 2  
 SWH 8278.146 Hz  
 FIDRES 0.126314 Hz  
 AQ 3.9584243 sec  
 RG 8  
 DW 60.400 usec  
 DE 6.00 usec  
 TE 298.1 K  
 D1 1.00000000 sec  
 TD0 1

==== CHANNEL f1 =====  
 NUC1 1H  
 P1 15.00 usec  
 PL1 4.90 dB  
 PL1W 3.30822015 W  
 SFO1 400.1324710 MHz

F2 - Processing parameters  
 SI 32768  
 SF 400.1300000 MHz  
 WDW EM  
 SSB 0  
 LB 0.30 Hz  
 GB 0  
 PC 1.00

Compound 24, <sup>13</sup>CNMR

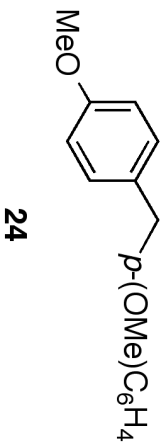

157.90  
133.75  
129.77  
113.85  
55.28  
40.14

Current Data Parameters  
NAME DM3-111-4  
EXPNO 2  
PROCNO 1

F2 - Acquisition Parameters

Date\_ 20120714  
Time\_ 12.20  
INSTRUM spect  
PROBHD 5 mm CPQNP 1H/  
PULPROG zgpg30  
TD 65536  
SOLVENT CDC13  
NS 256  
DS 4  
SWH 23980.814 Hz  
FIDRES 0.365918 Hz  
AQ 1.3664756 sec  
RG 512  
DW 20.850 usec  
DE 18.00 usec  
TE 298.1 K  
D1 2.00000000 sec  
D11 0.03000000 sec  
TD0 1

==== CHANNEL f1 =====  
NUC1 13C  
P1 9.25 usec  
PL1 0.55 dB  
PL1W 35.18820572 W  
SFO1 100.6228298 MHz

==== CHANNEL f2 =====  
CPDPRG2 waltz16  
NUC2 1H  
PCPD2 90.00 usec  
PL2 4.90 dB  
PL12 20.46 dB  
PL13 21.00 dB  
PL12W 3.30822015 W  
PL12W 0.09195905 W  
PL13W 0.08120718 W  
SFO2 400.1316005 MHz

F2 - Processing parameters  
SI 32768  
SF 100.6127690 MHz  
WDW EM  
SSB 0  
LB 1.00 Hz  
GB 0  
PC 1.40

170 160 150 140 130 120 110 100 90 80 70 60 50 40 30 20 ppm

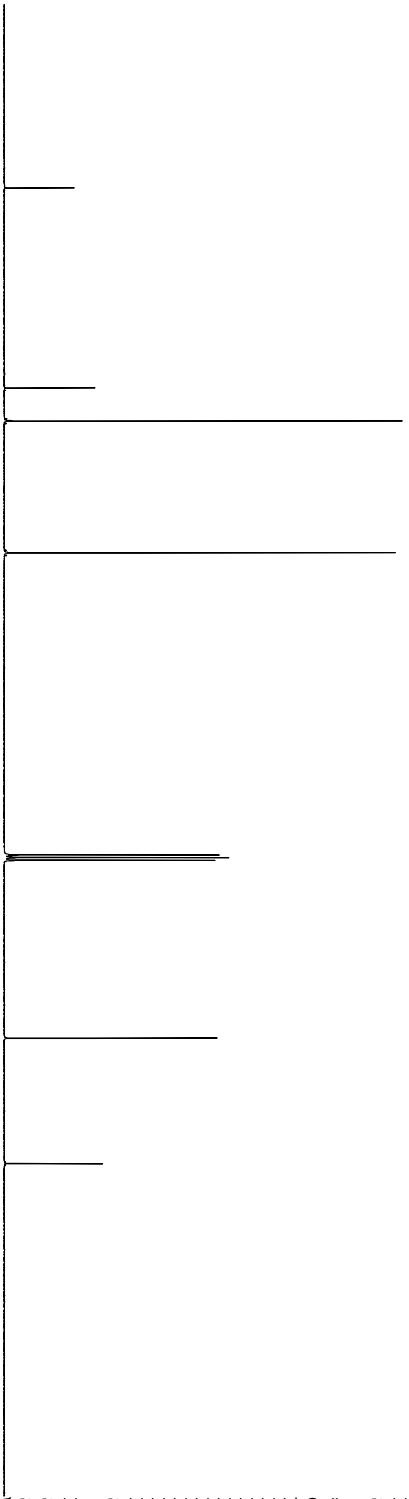



Compound 25, <sup>1</sup>H NMR



Current Data Parameters  
 NAME PM-3-256-2A  
 EXPNO 1  
 PROCNO 1

7.578  
 7.558  
 7.339  
 7.319  
 7.171  
 7.151  
 7.119  
 7.099

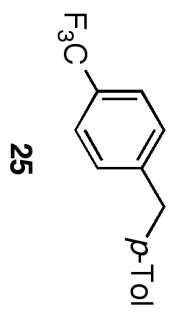

4.031

2.367

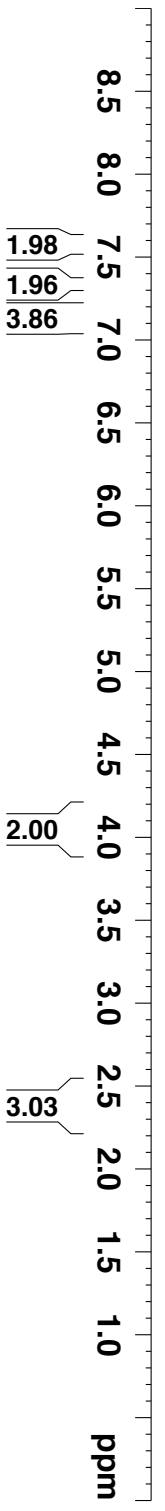

F2 - Acquisition Parameters  
 Date\_ 20120512  
 Time\_ 14.39  
 INSTRUM spect  
 PROBHD 5 mm CPQNP 1H/  
 PULPROG zg30  
 TD 65536  
 SOLVENT CDCl3  
 NS 16  
 DS 2  
 SWH 8278.146 Hz  
 FIDRES 0.126314 Hz  
 AO 3.9584243 sec  
 RG 10.1  
 DW 60.400 usec  
 DE 6.00 usec  
 TE 298.2 K  
 D1 1.00000000 sec  
 TD0 1

==== CHANNEL f1 =====  
 NUC1 1H  
 P1 15.00 usec  
 PL1 4.90 dB  
 PL1W 3.30822015 W  
 SFO1 400.1324710 MHz

F2 - Processing parameters  
 SI 32768  
 SF 400.1300000 MHz  
 WDW EM  
 SSB 0  
 LB 0.30 Hz  
 GB 0  
 PC 1.00

Compound 25, <sup>13</sup>CNMR



- 136.98
- 136.06
- 129.38
- 129.14
- 128.84
- 128.54
- 128.22
- 125.45
- 125.42
- 125.38
- 125.34
- 123.00

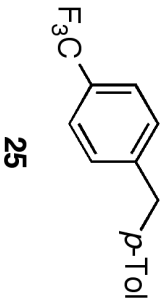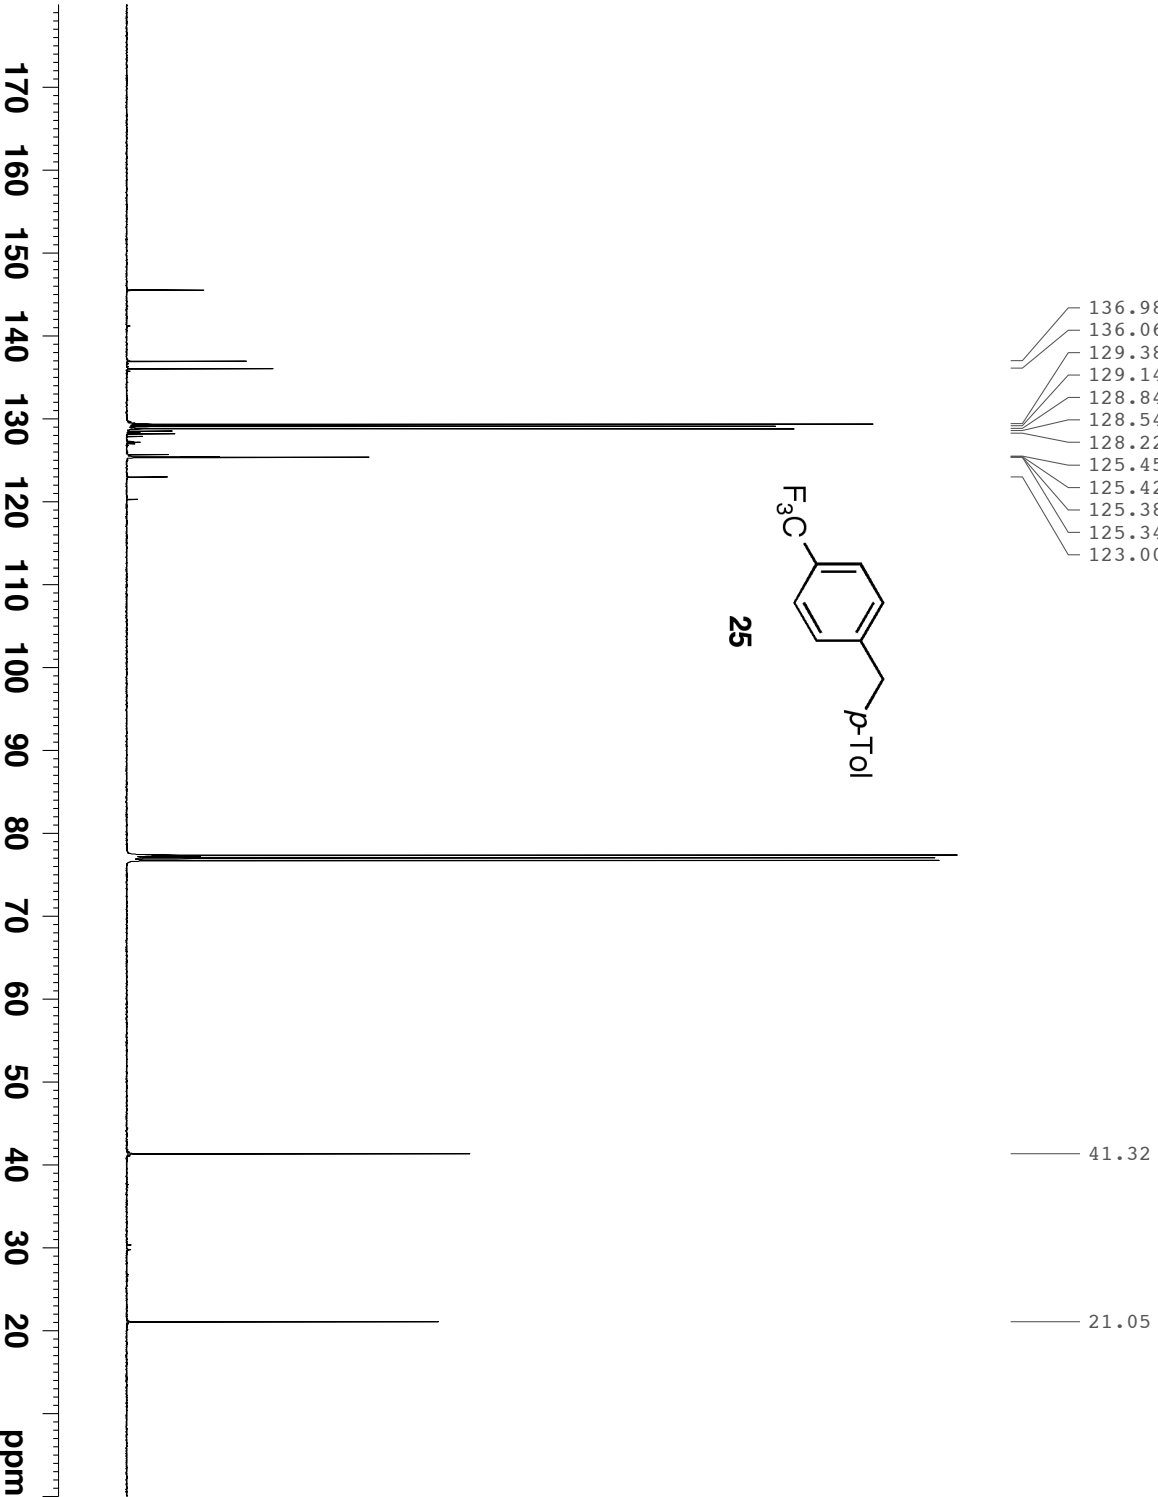

Current Data Parameters  
 NAME PM-3-256-2A  
 EXPNO 3  
 PROCNO 1

F2 - Acquisition Parameters  
 Date\_ 20120512  
 Time\_ 21.04  
 INSTRUM spect  
 PROBD 5 mm CPQNP 1H/  
 PULPROG zgpg30  
 TD 65536  
 SOLVENT CDC13  
 NS 1024  
 DS 4  
 SWH 23980.814 Hz  
 FIDRES 0.365918 Hz  
 AQ 1.3664756 sec  
 RG 512  
 DW 20.850 usec  
 DE 18.00 usec  
 TE 298.2 K  
 D1 2.00000000 sec  
 D11 0.03000000 sec  
 TD0 1

==== CHANNEL f1 =====  
 NUC1 13C  
 P1 9.25 usec  
 PL1 0.55 dB  
 PL1W 35.18820572 W  
 SFO1 100.6228298 MHz

==== CHANNEL f2 =====  
 CPDPRG2 waltz16  
 NUC2 1H  
 PCPD2 90.00 usec  
 PL2 4.90 dB  
 PL12 20.46 dB  
 PL13 21.00 dB  
 PL12W 3.30822015 W  
 PL12W 0.09195905 W  
 PL13W 0.08120718 W  
 SFO2 400.1316005 MHz

F2 - Processing parameters  
 SI 32768  
 SF 100.6127690 MHz  
 WDW EM  
 SSB 0  
 LB 1.00 Hz  
 GB 0  
 PC 1.40

Compound 26, <sup>1</sup>H NMR



Current Data Parameters  
 NAME PM-4-49-2  
 EXPNO 1  
 PROCNO 1

F2 - Acquisition Parameters

Date\_ 20120812  
 Time\_ 16.02  
 INSTRUM spect  
 PROBHD 5 mm CPQNP 1H/  
 PULPROG zg30  
 TD 65536  
 SOLVENT CDCl3  
 NS 16  
 DS 2  
 SWH 8278.146 Hz  
 FIDRES 0.126314 Hz  
 AQ 3.9584243 sec  
 RG 4  
 DW 60.400 usec  
 DE 6.00 usec  
 TE 298.2 K  
 D1 1.00000000 sec  
 TD0 1

==== CHANNEL f1 =====  
 NUC1 1H  
 P1 15.00 usec  
 PL1 4.90 dB  
 PL1W 3.30822015 W  
 SFO1 400.1324710 MHz

F2 - Processing parameters  
 SI 32768  
 SF 400.1300000 MHz  
 WDW EM  
 SSB 0  
 LB 0.30 Hz  
 GB 0  
 PC 1.00

|       |  |
|-------|--|
| 7.334 |  |
| 7.315 |  |
| 7.284 |  |
| 7.252 |  |
| 7.233 |  |
| 7.189 |  |
| 7.161 |  |
| 4.489 |  |
| 4.017 |  |
| 3.451 |  |
| 2.388 |  |

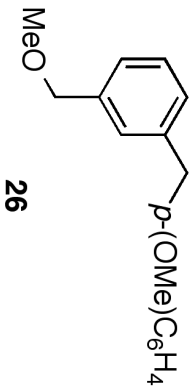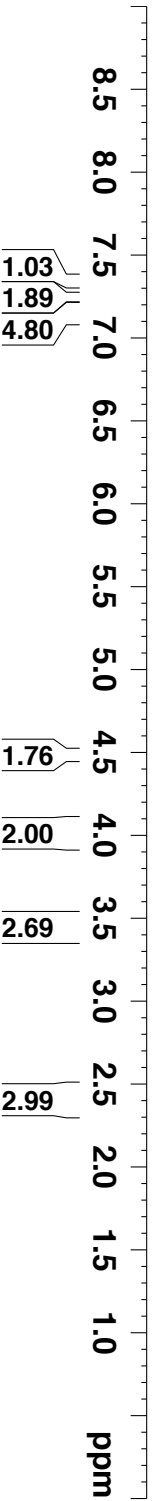

Compound 26, 13C NMR

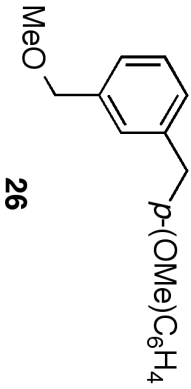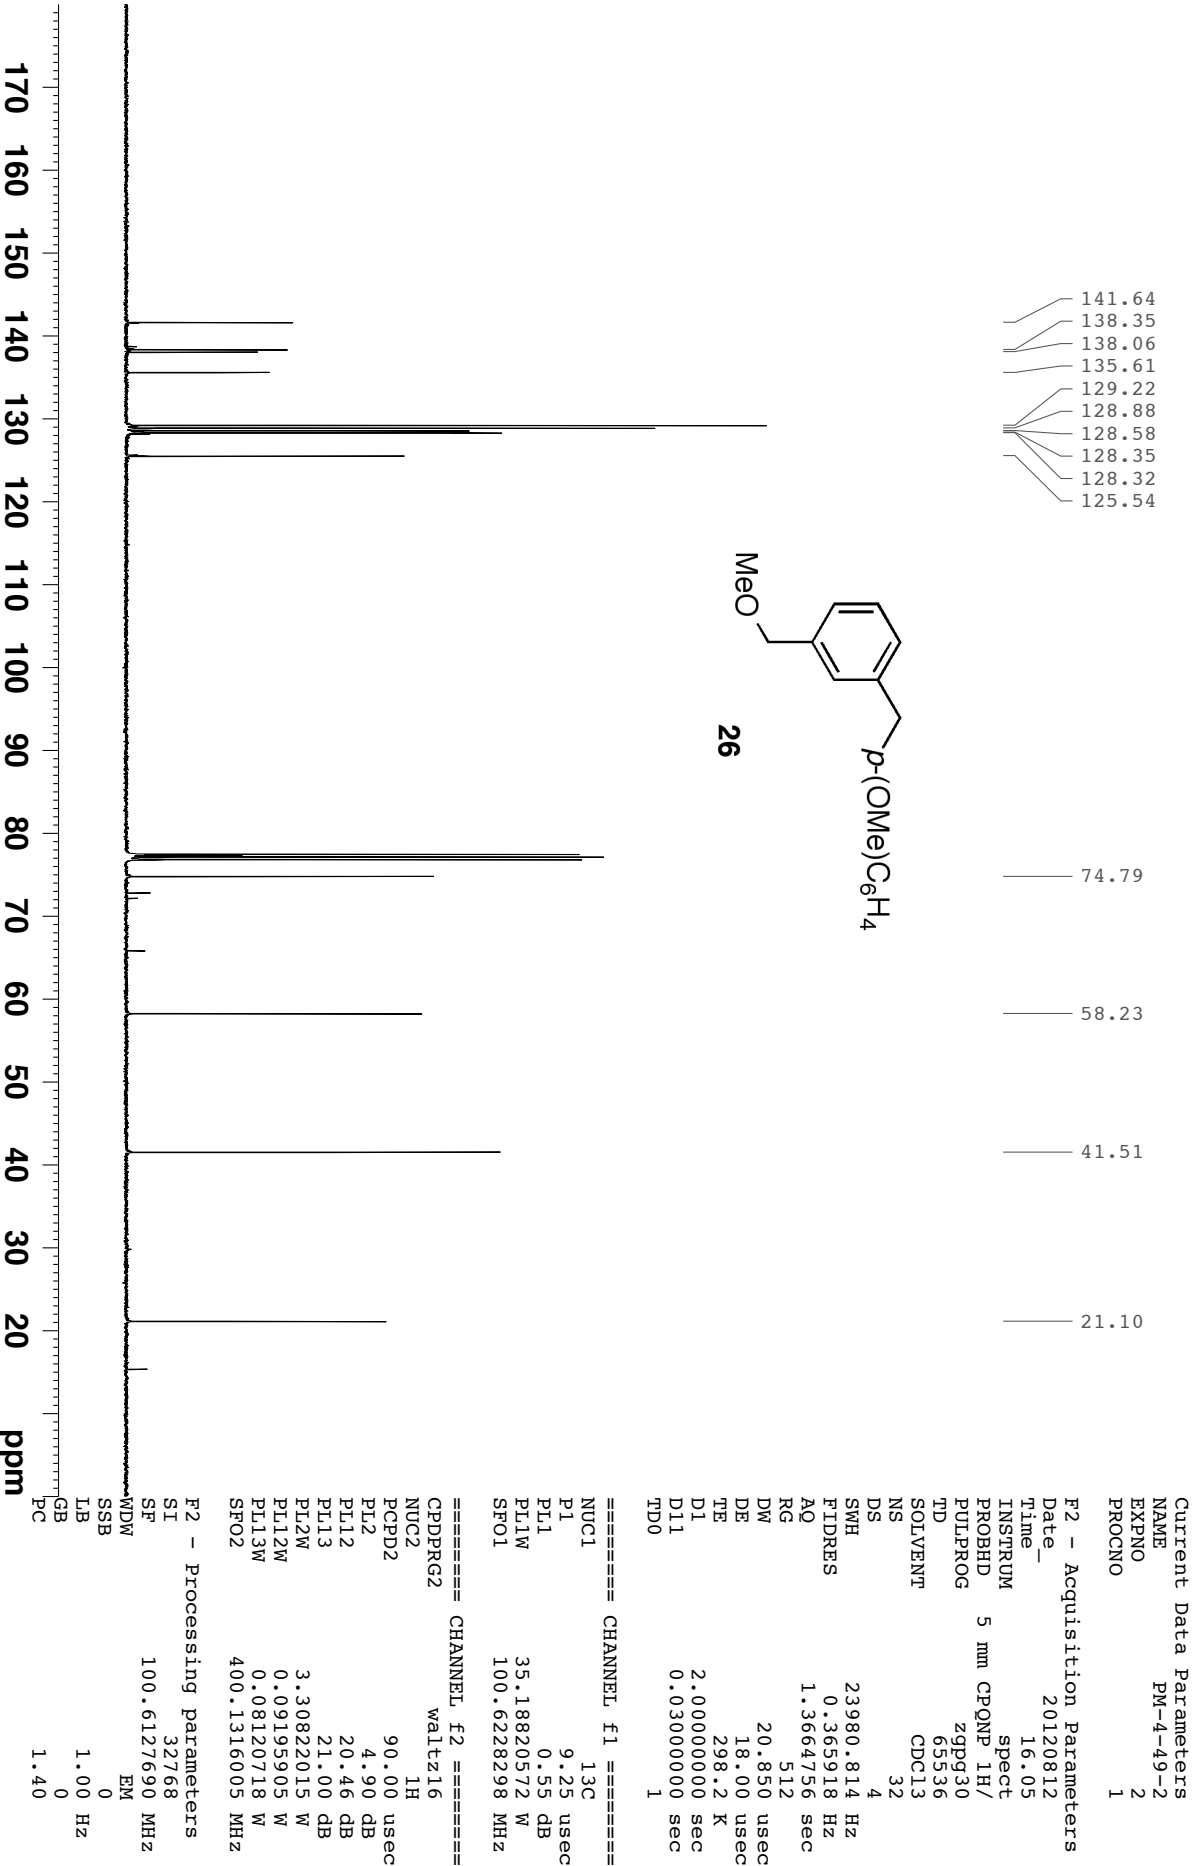

Compound 27, <sup>1</sup>H NMR

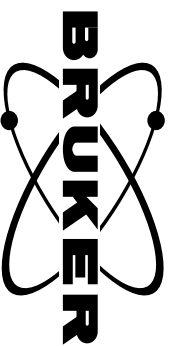

Current Data Parameters  
 NAME DM3-111-3  
 EXPNO 1  
 PROCNO 1

F2 - Acquisition Parameters

Date\_ 20120714  
 Time\_ 12.26  
 INSTRUM spect  
 PROBHD 5 mm CPQNP 1H/  
 PULPROG zg30  
 TD 65536  
 SOLVENT CDCl3  
 NS 16  
 DS 2  
 SWH 8278.146 Hz  
 FIDRES 0.126314 Hz  
 AQ 3.9584243 sec  
 RG 14.3  
 DW 60.400 usec  
 DE 6.00 usec  
 TE 298.1 K  
 D1 1.00000000 sec  
 TD0 1

==== CHANNEL f1 =====  
 NUC1 1H  
 P1 15.00 usec  
 PL1 4.90 dB  
 PL1W 3.30822015 W  
 SFO1 400.1324710 MHz

F2 - Processing parameters  
 SI 32768  
 SF 400.1300000 MHz  
 WDW EM  
 SSB 0  
 LB 0.30 Hz  
 GB 0  
 PC 1.00

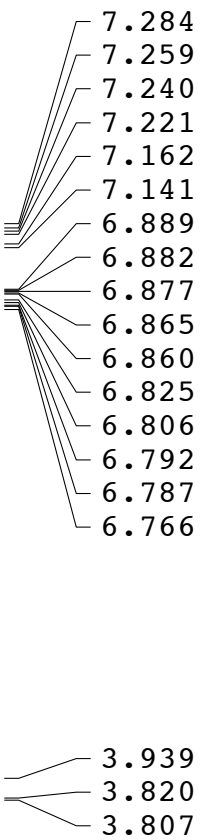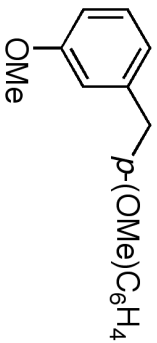

27

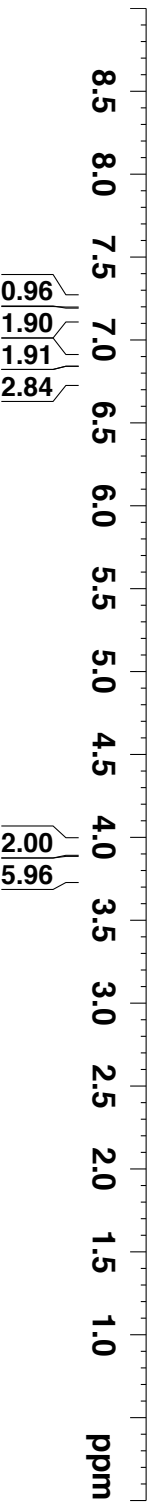

Compound 27, <sup>13</sup>CNMR



159.70  
157.98  
143.23  
133.06  
129.88  
129.42  
121.27  
114.66  
113.88  
111.21

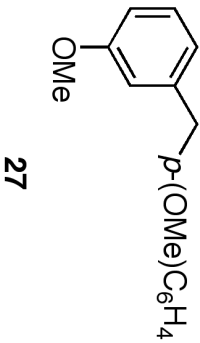

55.28  
55.15  
41.07

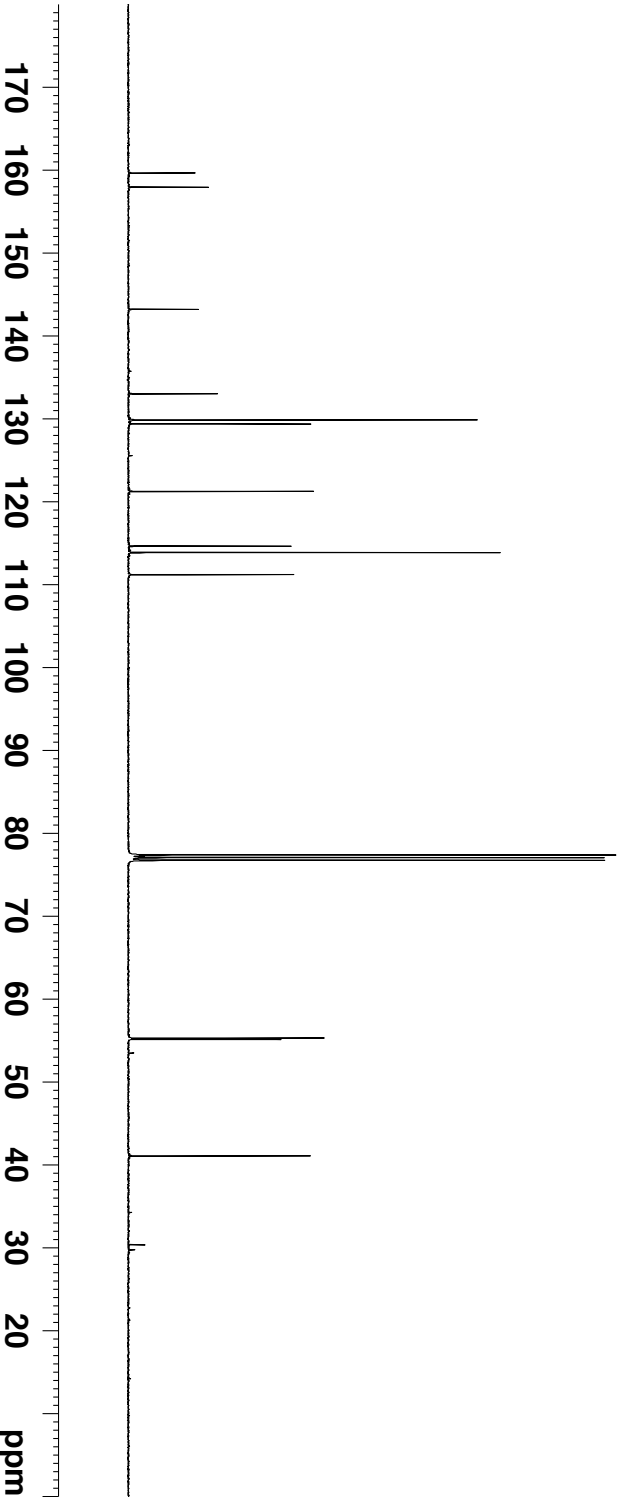

Current Data Parameters  
 NAME DM3-111-3  
 EXPNO 2  
 PROCNO 1

F2 - Acquisition Parameters  
 Date\_ 20120714  
 Time\_ 12.42  
 INSTRUM spect  
 PROBD 5 mm CPQNP 1H/  
 PULPROG zgpg30  
 TD 65536  
 SOLVENT CDC13  
 NS 256  
 DS 4  
 SWH 23980.814 Hz  
 FIDRES 0.365918 Hz  
 AQ 1.3664756 sec  
 RG 512  
 DW 20.850 usec  
 DE 18.00 usec  
 TE 298.2 K  
 D1 2.00000000 sec  
 D11 0.03000000 sec  
 TD0 1

==== CHANNEL f1 =====  
 NUC1 13C  
 P1 9.25 usec  
 PL1 0.55 dB  
 PL1W 35.18820572 W  
 SFO1 100.6228298 MHz

==== CHANNEL f2 =====  
 CPDPRG2 waltz16  
 NUC2 1H  
 PCPD2 90.00 usec  
 PL2 4.90 dB  
 PL12 20.46 dB  
 PL13 21.00 dB  
 PL12W 3.30822015 W  
 PL12W 0.09195905 W  
 PL13W 0.08120718 W  
 SFO2 400.1316005 MHz

F2 - Processing parameters  
 SI 32768  
 SF 100.6127690 MHz  
 WDM EM  
 SSB 0  
 LB 1.00 Hz  
 GB 0  
 PC 1.40

170 160 150 140 130 120 110 100 90 80 70 60 50 40 30 20 ppm

Compound 28, <sup>1</sup>H NMR

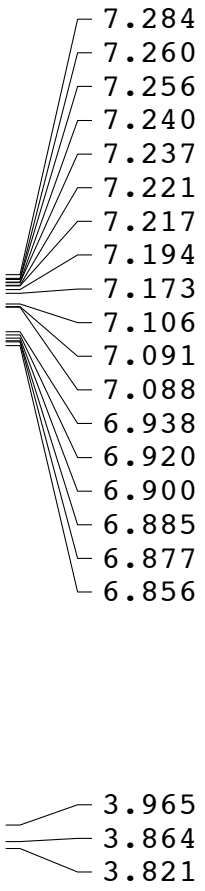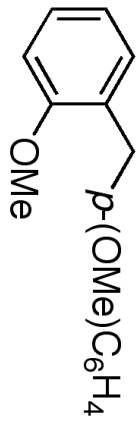

28

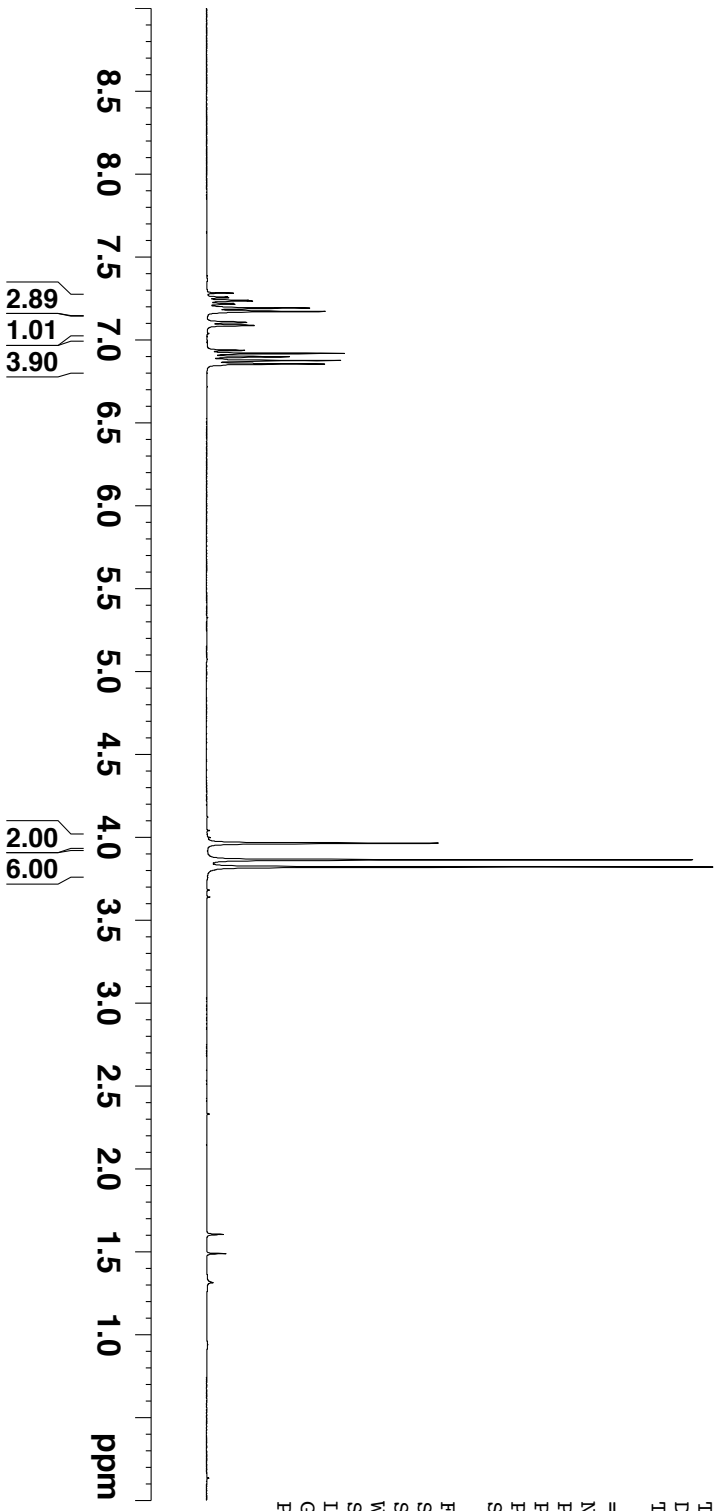

Current Data Parameters  
 NAME DM3-111-2  
 EXPNO 1  
 PROCNO 1

F2 - Acquisition Parameters  
 Date\_ 20120714  
 Time\_ 12.49  
 INSTRUM spect  
 PROBHD 5 mm CPQNP 1H/  
 PULPROG zg30  
 TD 65536  
 SOLVENT CDCl3  
 NS 16  
 DS 2  
 SWH 8278.146 Hz  
 FIDRES 0.126314 Hz  
 AQ 3.9584243 sec  
 RG 14.3  
 DW 60.400 usec  
 DE 6.00 usec  
 TE 298.2 K  
 D1 1.00000000 sec  
 TD0 1

==== CHANNEL f1 =====  
 NUC1 1H  
 P1 15.00 usec  
 PL1 4.90 dB  
 PL1W 3.30822015 W  
 SFO1 400.1324710 MHz

F2 - Processing parameters  
 SI 32768  
 SF 400.1300000 MHz  
 WDW EM  
 SSB 0  
 LB 0.30 Hz  
 GB 0  
 PC 1.00

Compound 28, <sup>13</sup>CNMR

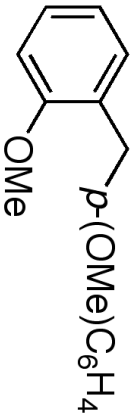

28

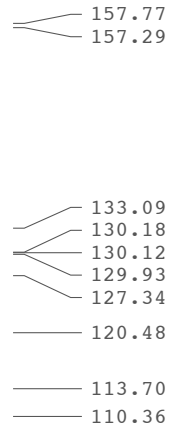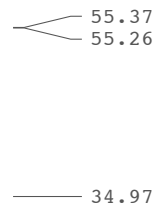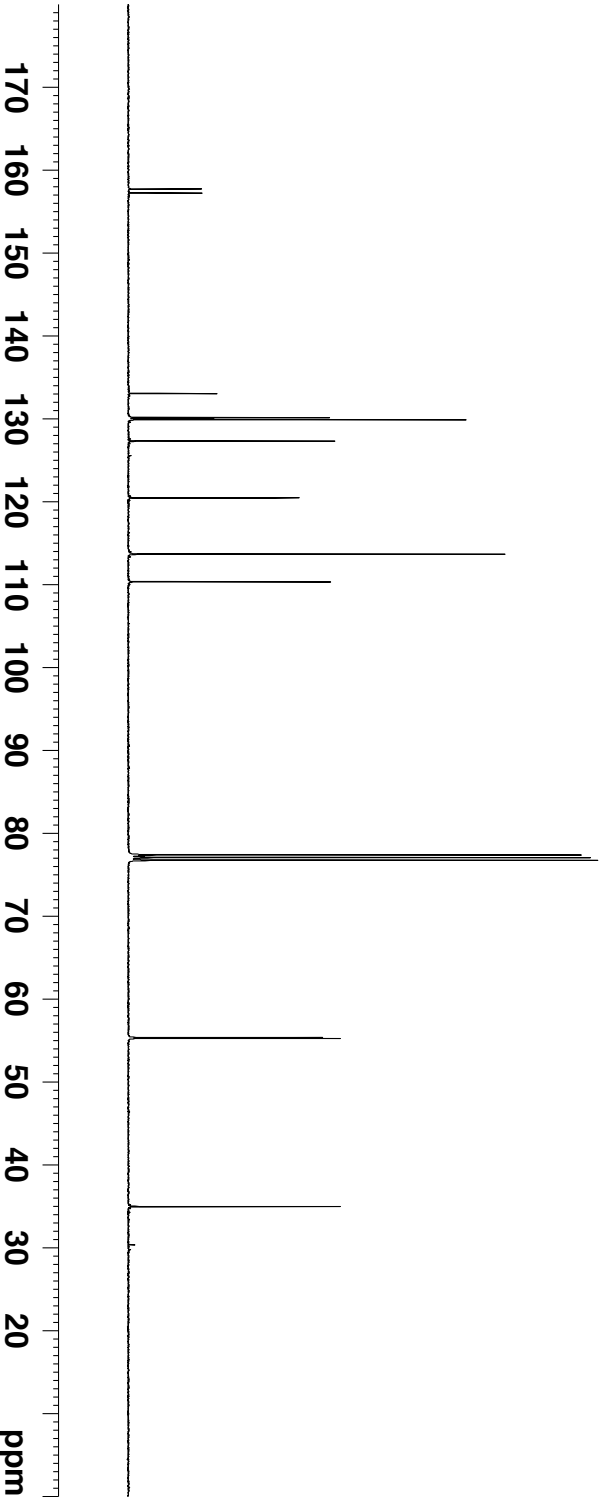

Current Data Parameters  
 NAME DM3-111-2  
 EXPNO 2  
 PROCNO 1

F2 - Acquisition Parameters  
 Date\_ 20120714  
 Time\_ 13.05  
 INSTRUM spect  
 PROBHD 5 mm CPQNP 1H/  
 PULPROG zgpg30  
 TD 65536  
 SOLVENT CDCl3  
 NS 256  
 DS 4  
 SWH 23980.814 Hz  
 FIDRES 0.365918 Hz  
 AQ 1.3664756 sec  
 RG 512  
 DW 20.850 usec  
 DE 18.00 usec  
 TE 298.2 K  
 D1 2.00000000 sec  
 D11 0.03000000 sec  
 TD0 1

==== CHANNEL f1 =====  
 NUC1 13C  
 P1 9.25 usec  
 PL1 0.55 dB  
 PL1W 35.18820572 W  
 SFO1 100.6228298 MHz

==== CHANNEL f2 =====  
 CPDPRG2 waltz16  
 NUC2 1H  
 PCPD2 90.00 usec  
 PL2 4.90 dB  
 PL12 20.46 dB  
 PL13 21.00 dB  
 PL12W 3.30822015 W  
 PL12W 0.09195905 W  
 PL13W 0.08120718 W  
 SFO2 400.1316005 MHz

F2 - Processing parameters  
 SI 32768  
 SF 100.6127690 MHz  
 WDM EM  
 SSB 0  
 LB 1.00 Hz  
 GB 0  
 PC 1.40



Compound 29, <sup>1</sup>H NMR

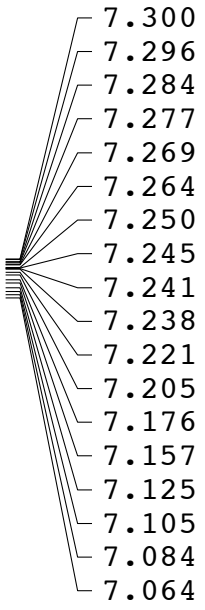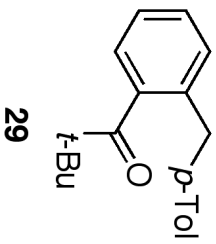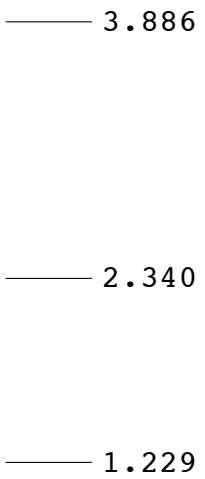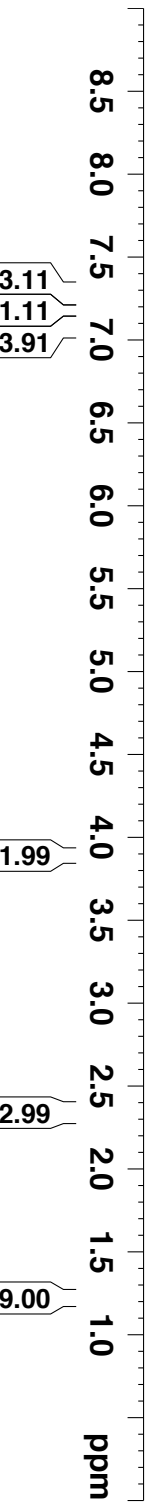

Current Data Parameters  
 NAME DM3-107-1  
 EXPNO 1  
 PROCNO 1

F2 - Acquisition Parameters  
 Date\_ 20120706  
 Time\_ 18.05  
 INSTRUM spect  
 PROBHD 5 mm CPQNP 1H/  
 PULPROG zg30  
 TD 65536  
 SOLVENT CDCl3  
 NS 16  
 DS 2  
 SWH 8278.146 Hz  
 FIDRES 0.126314 Hz  
 AQ 3.9584243 sec  
 RG 11.3  
 DW 60.400 usec  
 DE 6.00 usec  
 TE 298.2 K  
 D1 1.00000000 sec  
 TD0 1

==== CHANNEL f1 =====  
 NUC1 1H  
 P1 15.00 usec  
 PL1 4.90 dB  
 PL1W 3.30822015 W  
 SFO1 400.1324710 MHz

F2 - Processing parameters  
 SI 32768  
 SF 400.1300000 MHz  
 WDW EM  
 SSB 0  
 LB 0.30 Hz  
 GB 0  
 PC 1.00

Compound 29, <sup>13</sup>CNMR



Current Data Parameters  
 NAME DMM3-107-1  
 EXPNO 2  
 PROCNO 1

F2 - Acquisition Parameters  
 Date\_ 20120706  
 Time\_ 18.21

INSTRUM spect  
 PROBHD 5 mm CPQNP 1H/  
 PULPROG zgpg30  
 TD 65536  
 SOLVENT CDC13  
 NS 256  
 DS 4

SWH 23980.814 Hz  
 FIDRES 0.365918 Hz  
 AQ 1.3664756 sec  
 RG 512  
 DW 20.850 usec  
 DE 18.00 usec  
 TE 298.1 K  
 D1 2.00000000 sec  
 D11 0.03000000 sec  
 TD0 1

==== CHANNEL f1 =====  
 NUC1 13C  
 P1 9.25 usec  
 PL1 0.55 dB  
 PL1W 35.18820572 W  
 SF01 100.6228298 MHz

==== CHANNEL f2 =====  
 CPDPRG2 waltz16  
 NUC2 1H  
 PCPD2 90.00 usec  
 PL2 4.90 dB  
 PL12 20.46 dB  
 PL13 21.00 dB  
 PL2W 3.30822015 W  
 PL12W 0.09195905 W  
 PL13W 0.08120718 W  
 SF02 400.1316005 MHz

F2 - Processing parameters  
 SI 32768  
 SF 100.6127690 MHz  
 WDW EM  
 SSB 0  
 LB 1.00 Hz  
 GB 0  
 PC 1.40

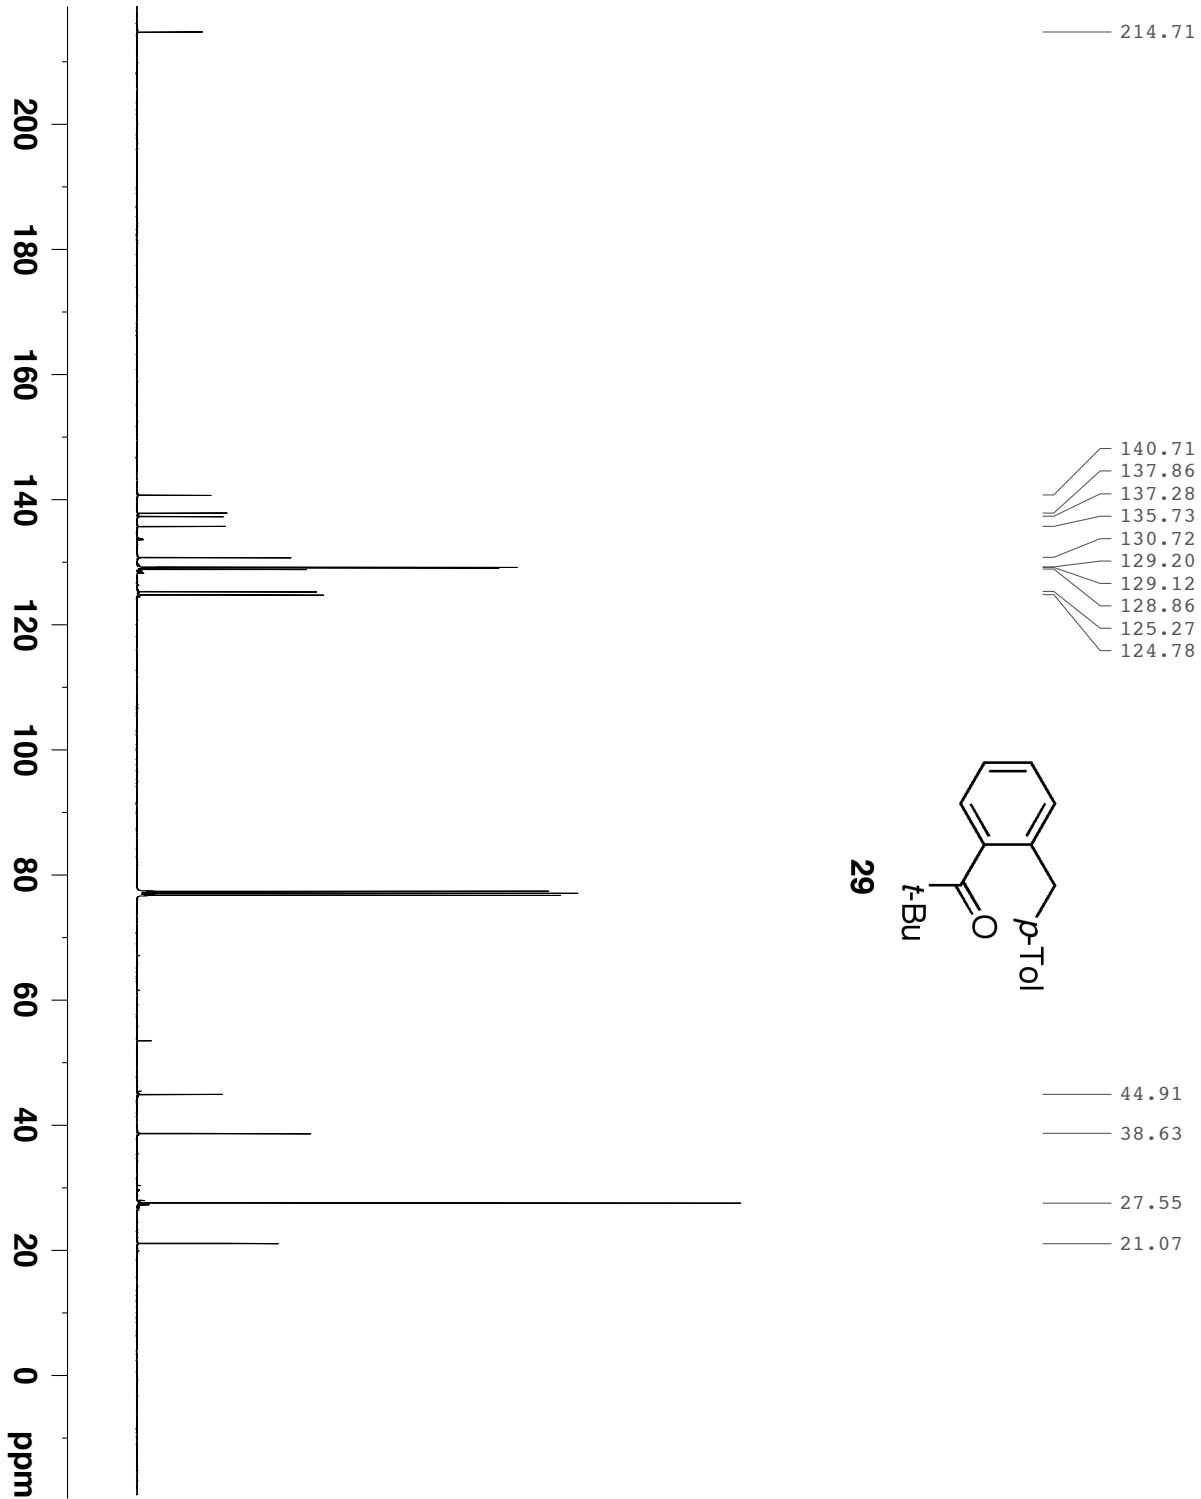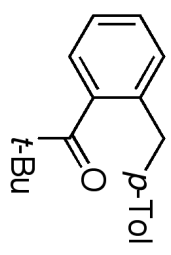

- 140.71
- 137.86
- 137.28
- 135.73
- 130.72
- 129.20
- 129.12
- 128.86
- 125.27
- 124.78

- 44.91
- 38.63
- 27.55
- 21.07

Compound 30, <sup>1</sup>H NMR

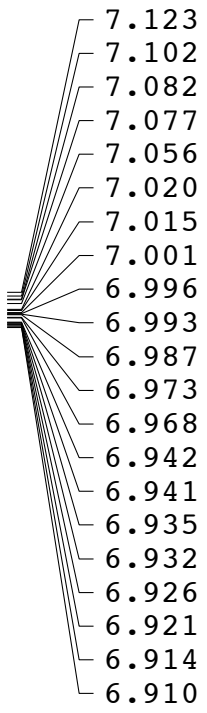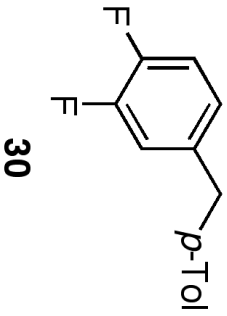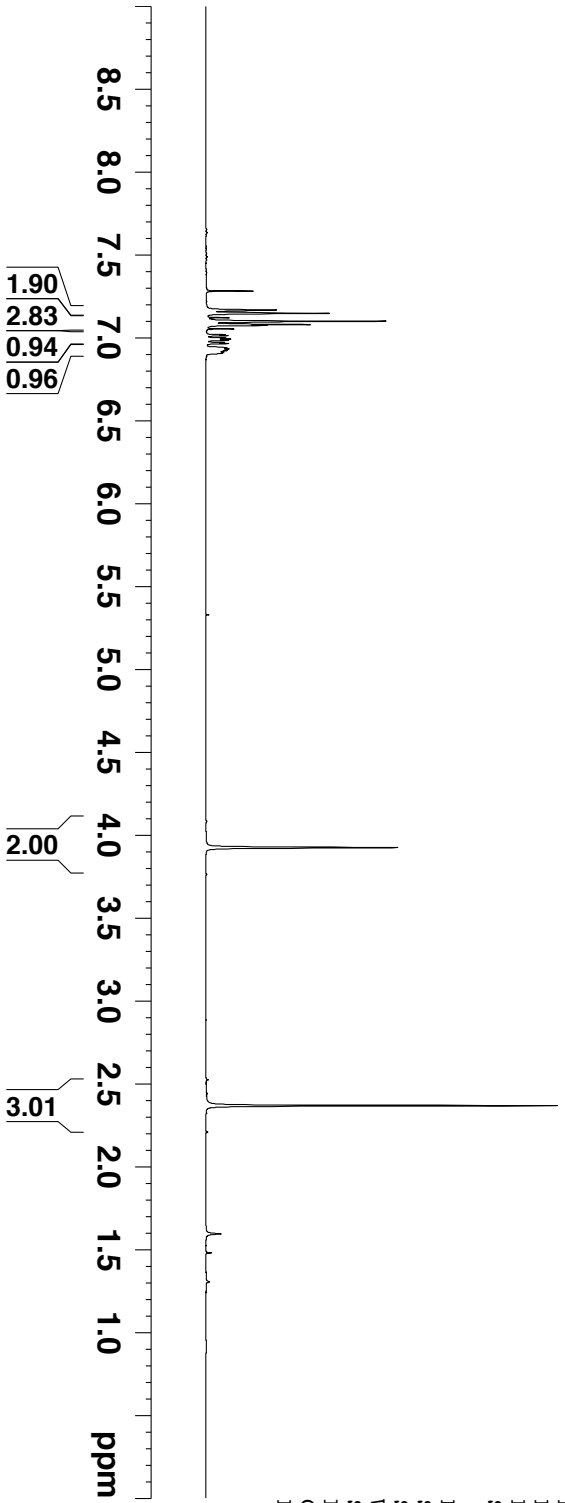

Current Data Parameters  
 NAME PM-4-24-1  
 EXPNO 1  
 PROCNO 1

F2 - Acquisition Parameters  
 Date\_ 20120717  
 Time\_ 11.17  
 INSTRUM spect  
 PROBHD 5 mm CPQNP 1H/  
 PULPROG zg30  
 TD 65536  
 SOLVENT CDCl3  
 NS 16  
 DS 2  
 SWH 8278.146 Hz  
 FIDRES 0.126314 Hz  
 AQ 3.9584243 sec  
 RG 12.7  
 DW 60.400 usec  
 DE 6.00 usec  
 TE 298.2 K  
 D1 1.00000000 sec  
 TD0 1

==== CHANNEL f1 =====  
 NUC1 1H  
 P1 15.00 usec  
 PL1 4.90 dB  
 PL1W 3.30822015 W  
 SFO1 400.1324710 MHz

F2 - Processing parameters  
 SI 32768  
 SF 400.1300000 MHz  
 WDW EM  
 SSB 0  
 LB 0.30 Hz  
 GB 0  
 PC 1.00

Compound 30, <sup>13</sup>CNMR

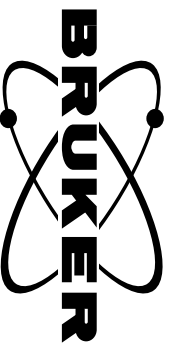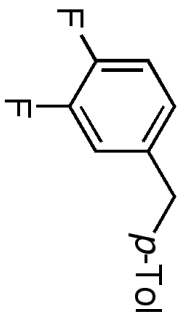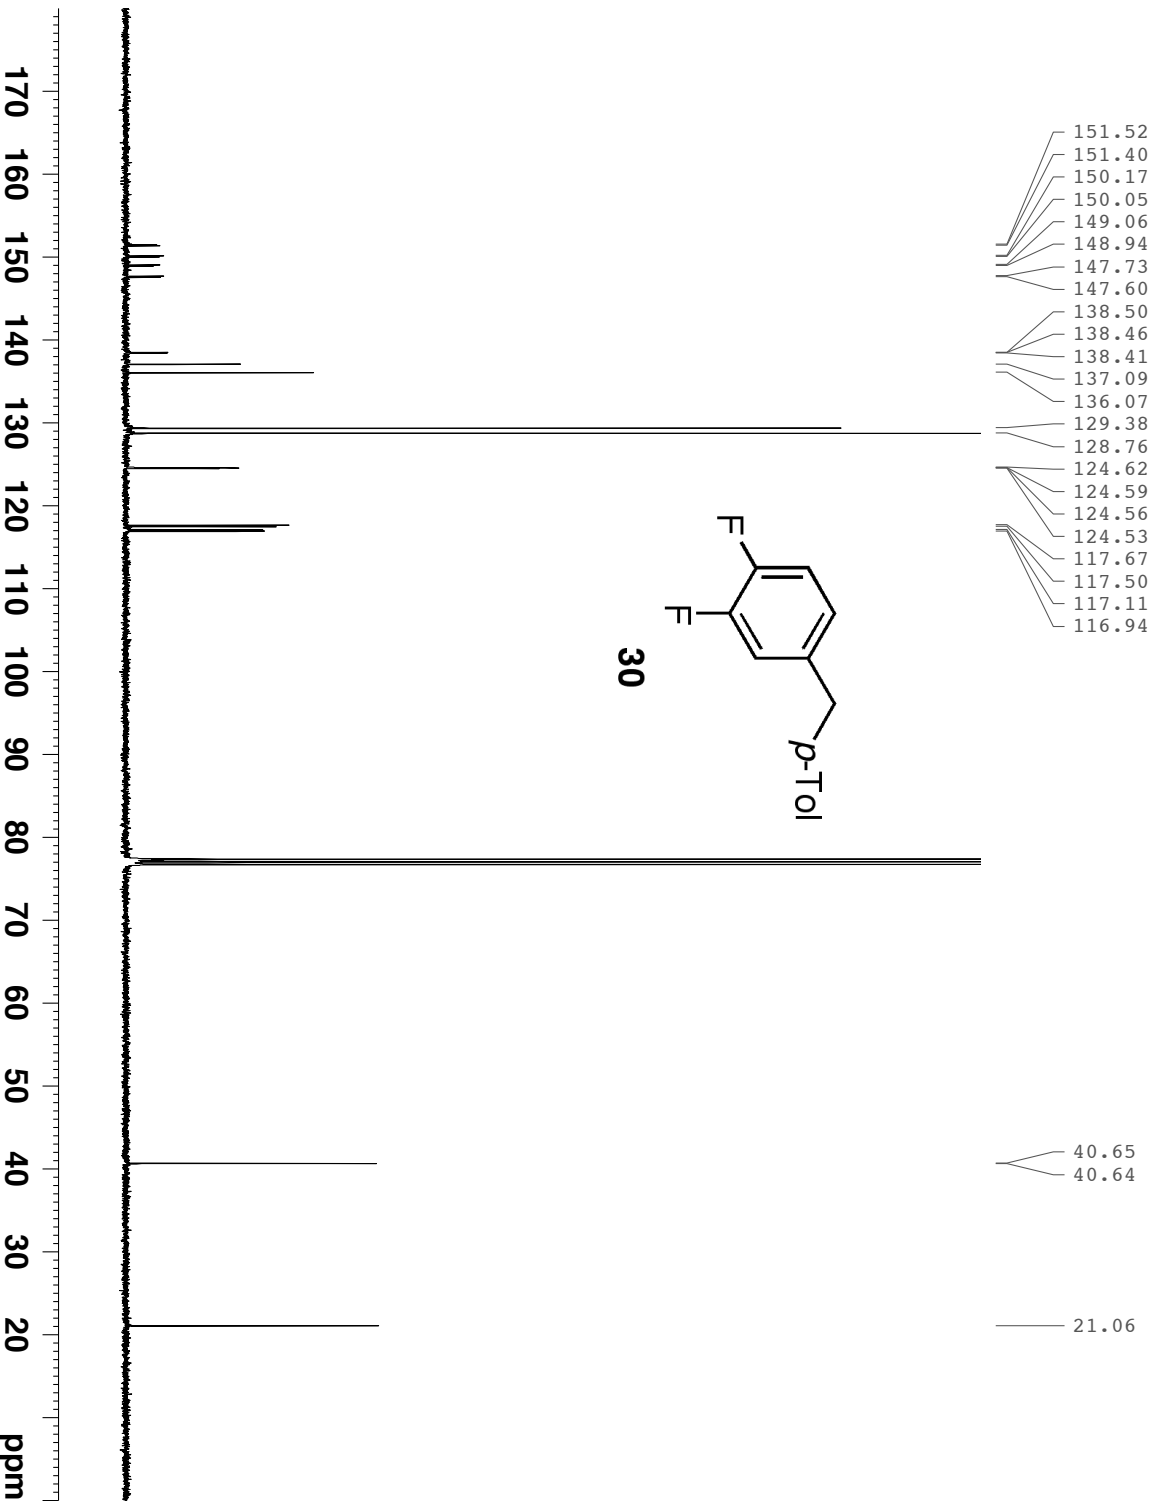

- 151.52
- 151.40
- 150.17
- 150.05
- 149.06
- 148.94
- 147.73
- 147.60
- 138.50
- 138.46
- 138.41
- 137.09
- 136.07
- 129.38
- 128.76
- 124.62
- 124.59
- 124.56
- 124.53
- 117.67
- 117.50
- 117.11
- 116.94

- 40.65
- 40.64

- 21.06

Current Data Parameters  
 NAME PM-4-24-1  
 EXPNO 2  
 PROCNO 1

F2 - Acquisition Parameters  
 Date\_ 20120717  
 time\_ 11.21

INSTRUM spect  
 PROBHD 5 mm CPQNP 1H/  
 PULPROG zgpg30  
 TD 65536  
 SOLVENT CDCl3  
 NS 32  
 DS 4  
 SWH 23980.814 Hz  
 FIDRES 0.365918 Hz  
 AQ 1.3664756 sec  
 RG 512  
 DW 20.850 usec  
 DE 18.00 usec  
 TE 298.1 K  
 D1 2.00000000 sec  
 D11 0.03000000 sec  
 TD0 1

==== CHANNEL f1 =====  
 NUC1 13C  
 P1 9.25 usec  
 PL1 0.55 dB  
 PL1W 35.18820572 W  
 SFO1 100.6228298 MHz

==== CHANNEL f2 =====  
 CPDPRG2 waltz16  
 NUC2 1H  
 PCPD2 90.00 usec  
 PL2 4.90 dB  
 PL12 20.46 dB  
 PL13 21.00 dB  
 PL12W 3.30822015 W  
 PL12W 0.09195905 W  
 PL13W 0.08120718 W  
 SFO2 400.1316005 MHz

F2 - Processing parameters  
 SI 32768  
 SF 100.6127690 MHz  
 WDM EM  
 SSB 0  
 LB 1.00 Hz  
 GB 0  
 PC 1.40

Compound 31, <sup>1</sup>H NMR



Current Data Parameters  
 NAME PM-4-24-5  
 EXPNO 1  
 PROCNO 1

F2 - Acquisition Parameters

Date\_ 20120718  
 Time\_ 6.39  
 INSTRUM spect  
 PROBHD 5 mm CPQNP 1H/  
 PULPROG zg30  
 TD 65536  
 SOLVENT CDCl3  
 NS 16  
 DS 2  
 SWH 8278.146 Hz  
 FIDRES 0.126314 Hz  
 AQ 3.9584243 sec  
 RG 10.1  
 DW 60.400 usec  
 DE 6.00 usec  
 TE 298.1 K  
 D1 1.00000000 sec  
 TD0 1

==== CHANNEL f1 =====  
 NUC1 1H  
 P1 15.00 usec  
 PL1 4.90 dB  
 PL1W 3.30822015 W  
 SFO1 400.1324710 MHz

F2 - Processing parameters  
 SI 32768  
 SF 400.1300000 MHz  
 WDW EM  
 SSB 0  
 LB 0.30 Hz  
 GB 0  
 PC 1.00

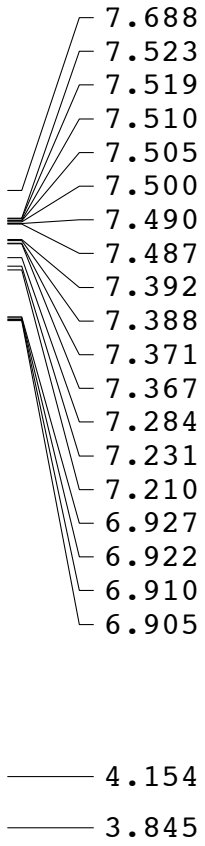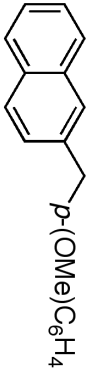

31

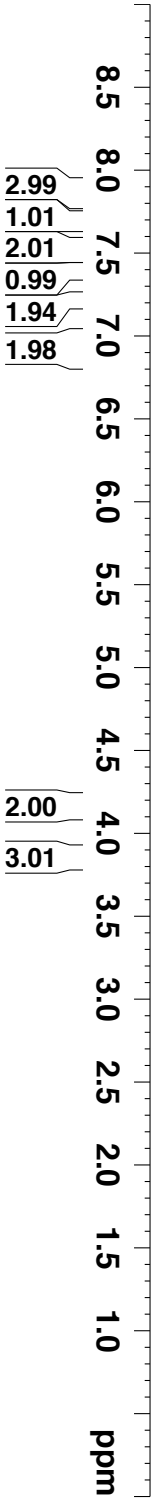

Compound 31, <sup>13</sup>CNMR



158.07  
 139.15  
 133.67  
 133.16  
 132.11  
 130.05  
 128.13  
 127.70  
 127.67  
 127.62  
 126.98  
 126.04  
 125.38  
 113.96

55.31  
 41.27

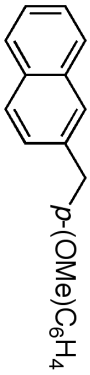

31

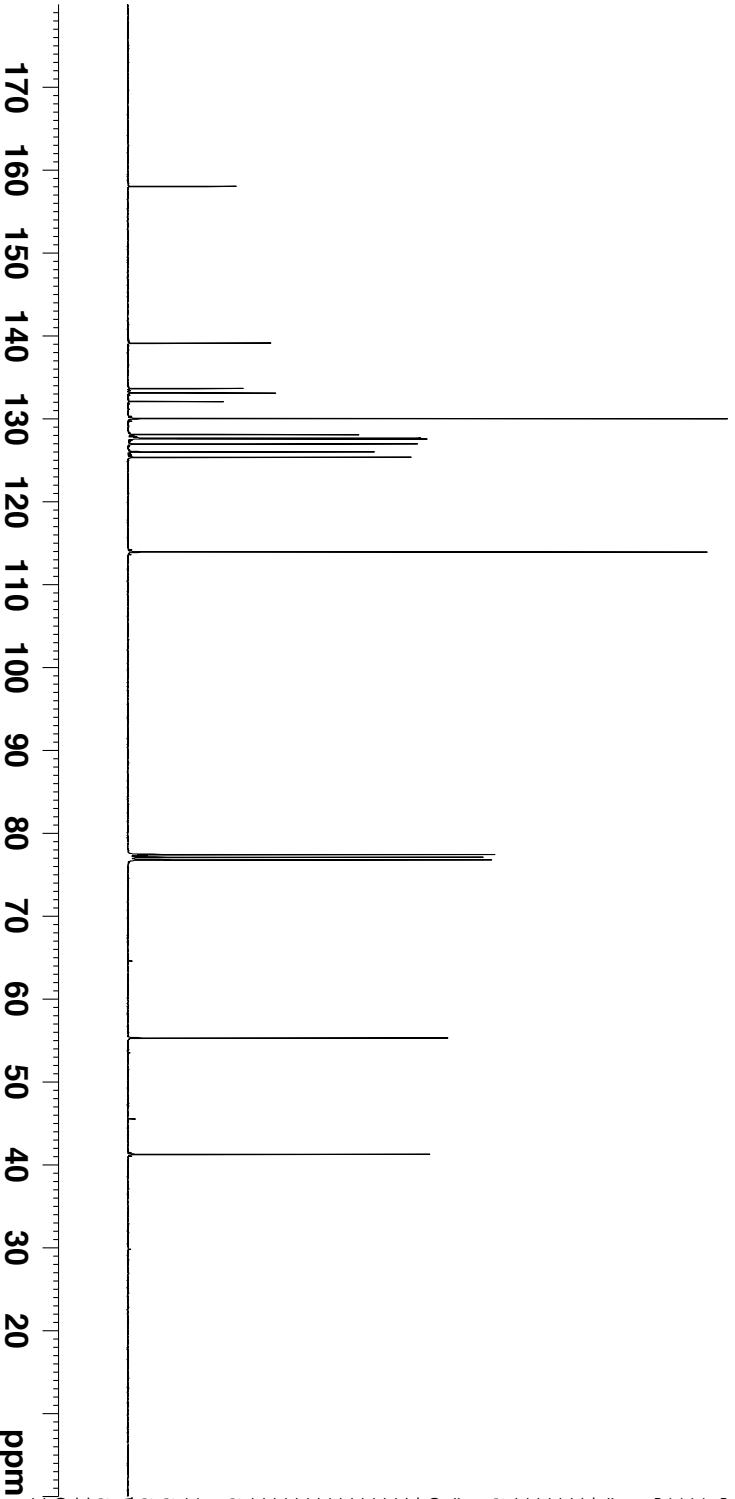

Current Data Parameters  
 NAME PM-4-24-5  
 EXPNO 2  
 PROCNO 1

F2 - Acquisition Parameters  
 Date\_ 20120718  
 Time\_ 6.55

INSTRUM spect  
 PROBD 5 mm CPQNP 1H/  
 PULPROG zgpg30  
 TD 65536  
 SOLVENT CDC13  
 NS 256  
 DS 4  
 SWH 23980.814 Hz  
 FIDRES 0.365918 Hz  
 AQ 1.3664756 sec  
 RG 512  
 DW 20.850 usec  
 DE 18.00 usec  
 TE 298.2 K  
 D1 2.00000000 sec  
 D11 0.03000000 sec  
 TD0 1

==== CHANNEL F1 =====  
 NUC1 13C  
 P1 9.25 usec  
 PL1 0.55 dB  
 PL1W 35.18820572 W  
 SFO1 100.6228298 MHz

==== CHANNEL F2 =====  
 CPDPRG2 waltz16  
 NUC2 1H  
 PCPD2 90.00 usec  
 PL2 4.90 dB  
 PL12 20.46 dB  
 PL13 21.00 dB  
 PL2W 3.30822015 W  
 PL12W 0.09195905 W  
 PL13W 0.08120718 W  
 SFO2 400.1316005 MHz

F2 - Processing parameters  
 SI 32768  
 SF 100.6127690 MHz  
 EM  
 WDW  
 SSB 0  
 LB 1.00 Hz  
 GB 0  
 PC 1.40

Compound 32, <sup>1</sup>H NMR



Current Data Parameters  
 NAME DMM3-065-2-pure  
 EXPNO 1  
 PROCNO 1

F2 - Acquisition Parameters

Date\_ 20120428  
 Time\_ 18.03  
 INSTRUM spect  
 PROBHD 5 mm CPQNP 1H/  
 PULPROG zg30  
 TD 65536  
 SOLVENT CDCl3  
 NS 16  
 DS 2  
 SWH 8278.146 Hz  
 FIDRES 0.126314 Hz  
 AQ 3.9584243 sec  
 RG 12.7  
 DW 60.400 usec  
 DE 6.00 usec  
 TE 298.2 K  
 D1 1.00000000 sec  
 TD0 1

==== CHANNEL f1 =====  
 NUC1 1H  
 P1 15.00 usec  
 PL1 4.90 dB  
 PL1W 3.30822015 W  
 SFO1 400.1324710 MHz

F2 - Processing parameters  
 SI 32768  
 SF 400.1300000 MHz  
 WDW EM  
 SSB 0  
 LB 0.30 Hz  
 GB 0  
 PC 1.00

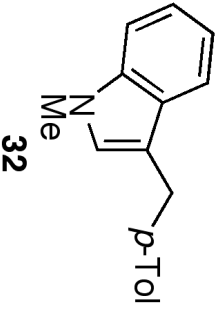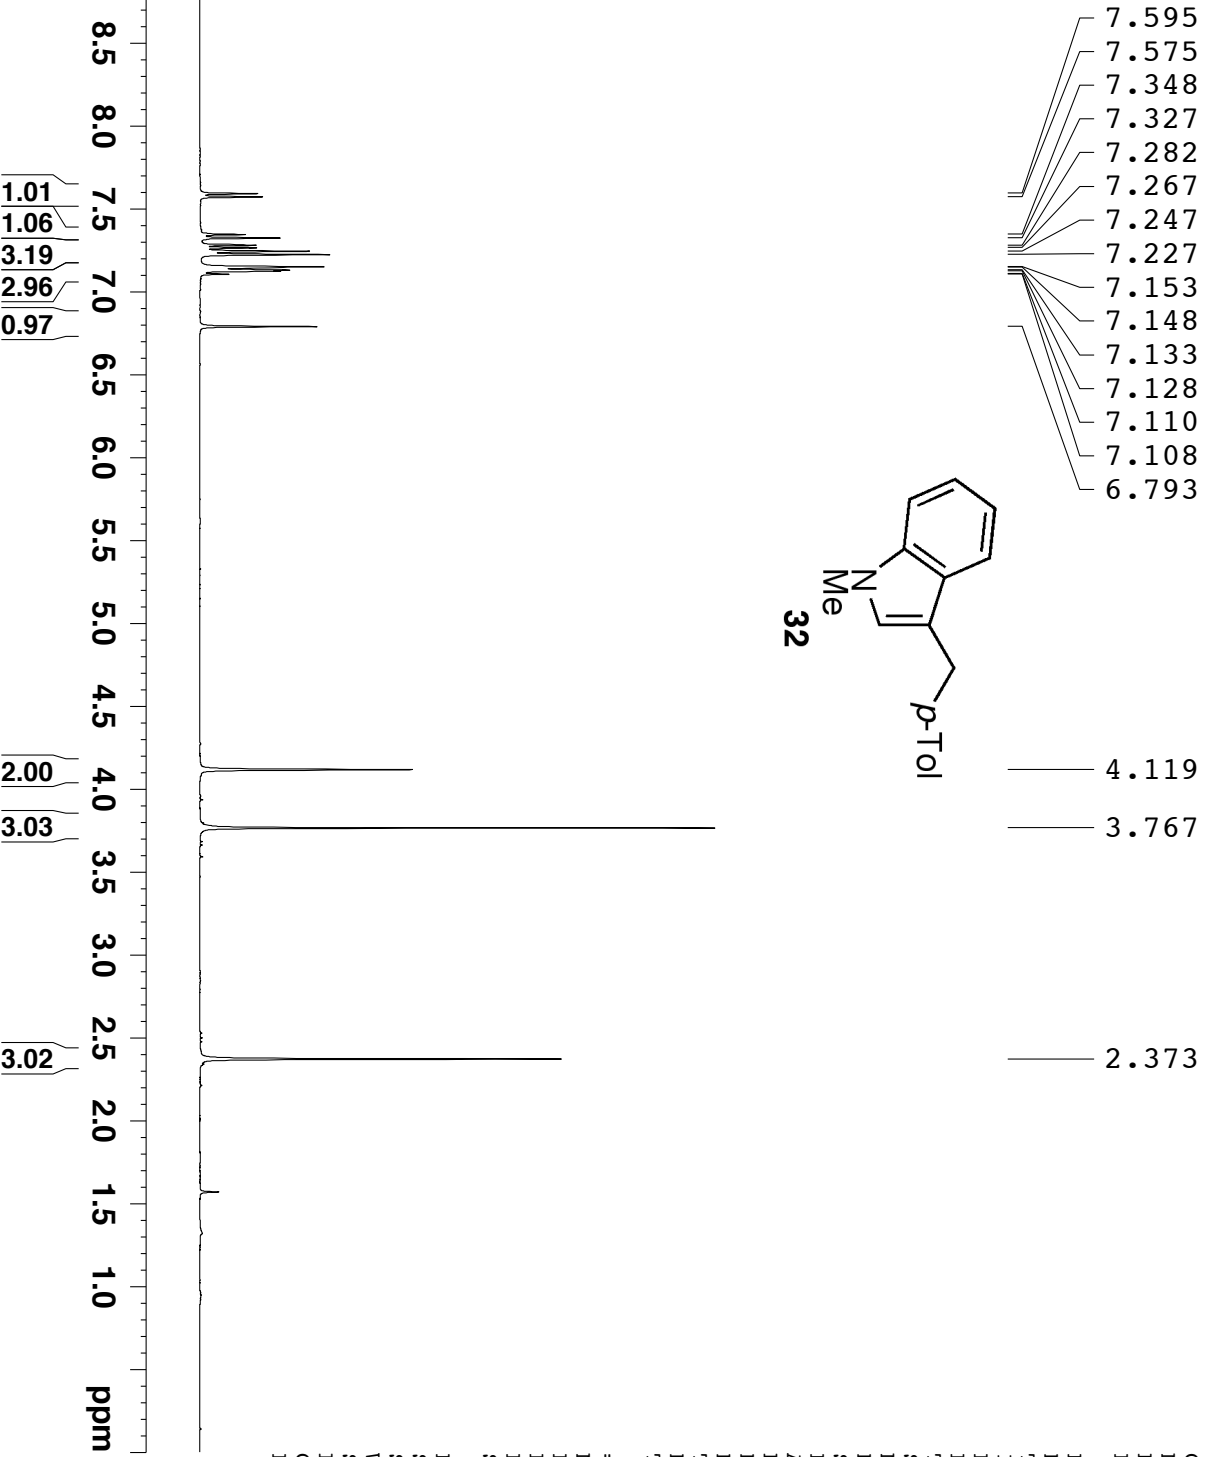

Compound 32, <sup>13</sup>CNMR



138.37  
137.17  
135.29  
129.06  
128.60  
127.86  
127.09  
121.56  
119.25  
118.76  
114.59  
109.16

32.64  
31.10  
21.10

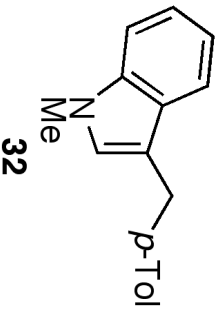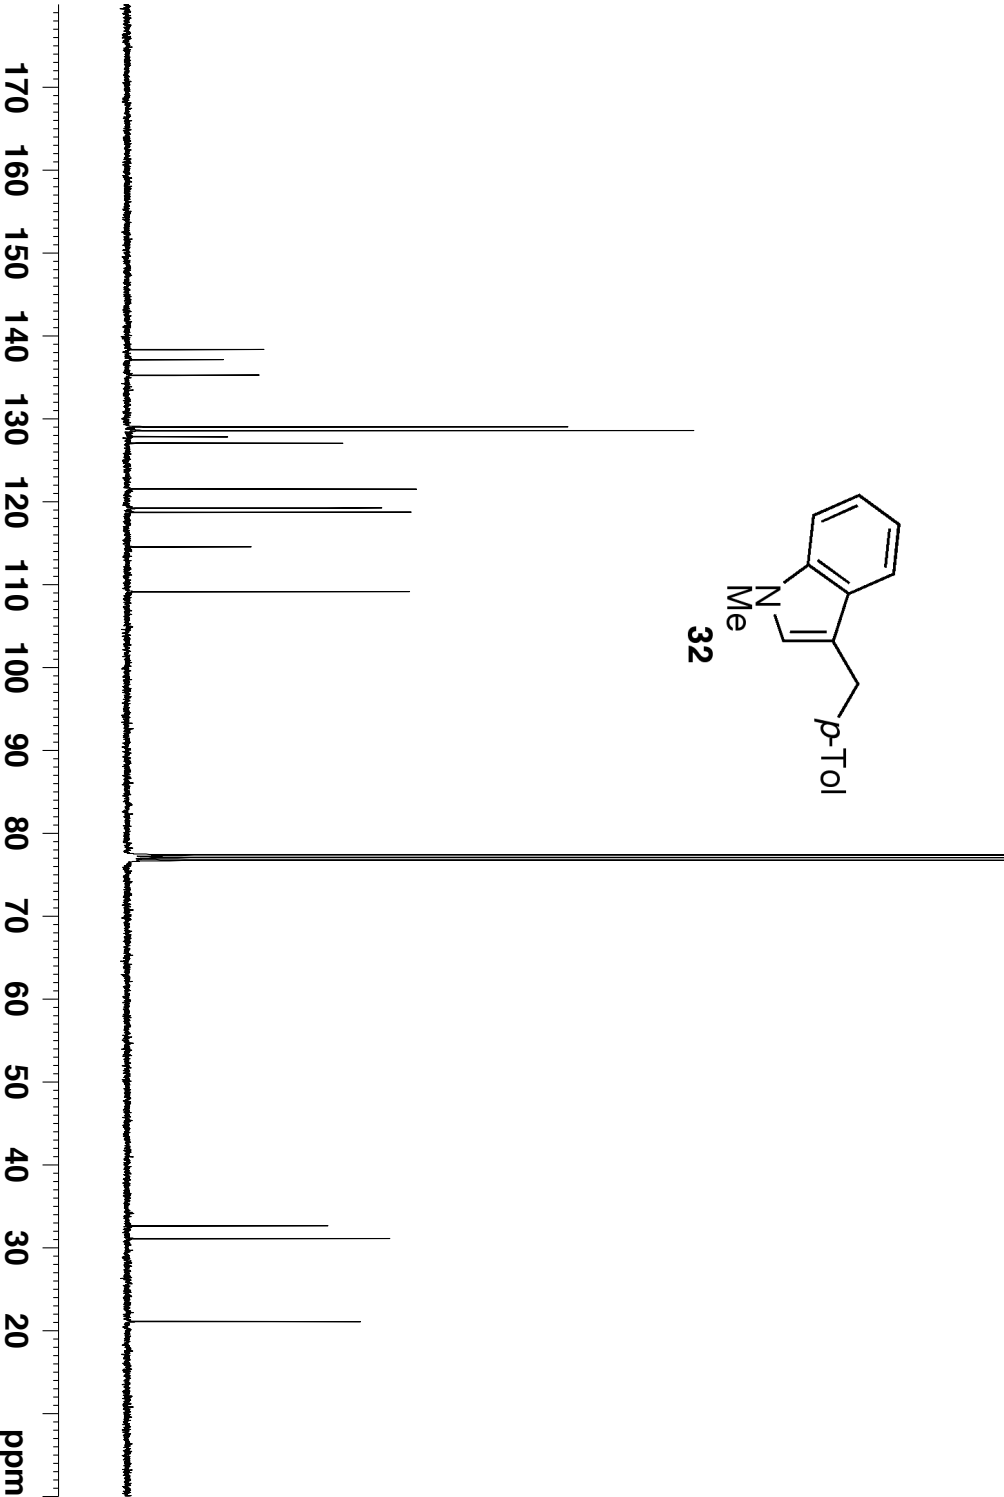

Current Data Parameters  
NAME DM3-065-2-pure  
EXPNO 2  
PROCNO 1

F2 - Acquisition Parameters  
Date\_ 20120428  
Time\_ 18.07

INSTRUM spect  
PROBHD 5 mm CPQNP 1H/  
PULPROG zgpg30  
TD 65536  
SOLVENT CDCl3  
NS 32  
DS 4

SWH 23980.814 Hz  
FIDRES 0.365918 Hz  
AQ 1.3664756 sec  
RG 512  
DW 20.850 usec  
DE 18.00 usec  
TE 298.2 K  
D1 2.00000000 sec  
D11 0.03000000 sec  
TD0 1

==== CHANNEL f1 =====  
NUC1 13C  
P1 9.25 usec  
PL1 0.55 dB  
PL1W 35.18820572 W  
SFO1 100.6228298 MHz

==== CHANNEL f2 =====  
CPDPRG2 waltz16  
NUC2 1H  
PCPD2 90.00 usec  
PL2 4.90 dB  
PL12 20.46 dB  
PL13 21.00 dB  
PL12W 3.30822015 W  
PL12W 0.09195905 W  
PL13W 0.08120718 W  
SFO2 400.1316005 MHz

F2 - Processing parameters  
SI 32768  
SF 100.6127690 MHz  
WDW EM  
SSB 0  
LB 1.00 Hz  
GB 0  
PC 1.40



Compound 34, <sup>1</sup>H NMR



S101

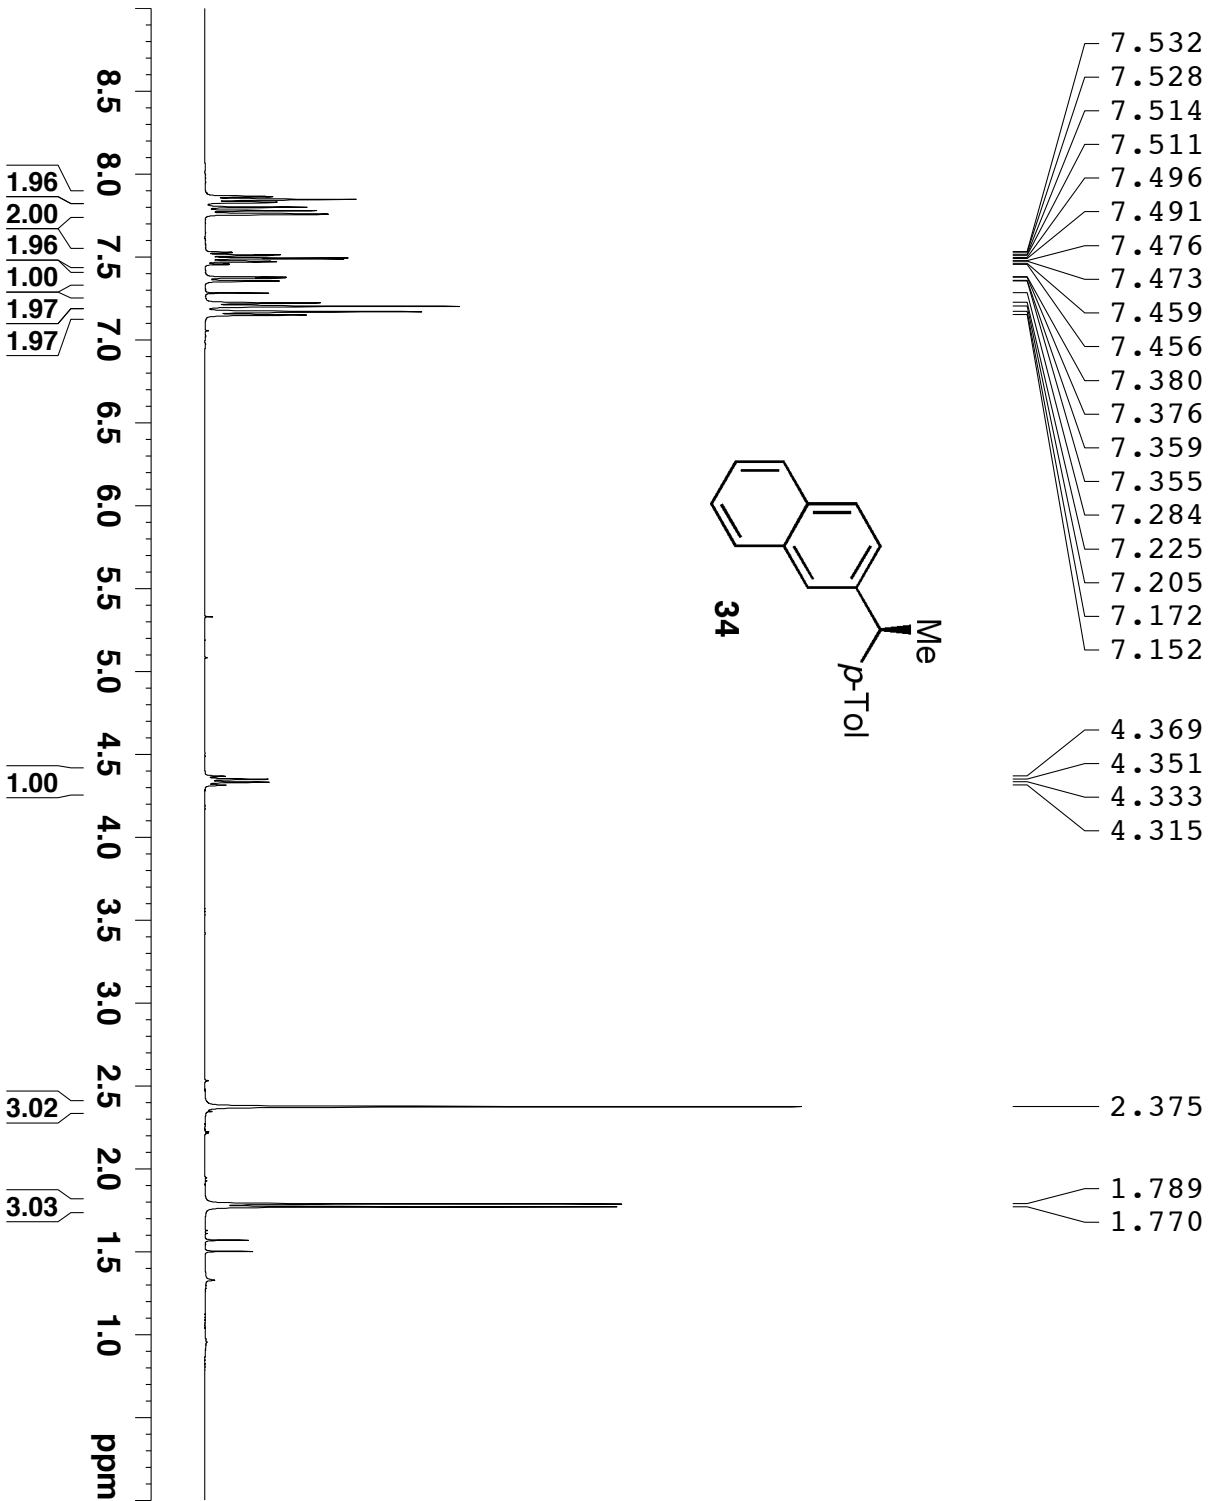

Current Data Parameters  
 NAME DM2-121-1  
 EXPNO 1  
 PROCNO 1

F2 - Acquisition Parameters

Date\_ 20120721  
 Time\_ 14.47  
 INSTRUM spect  
 PROBHD 5 mm CPQNP 1H/  
 PULPROG zg30  
 TD 65536  
 SOLVENT CDCl3  
 NS 16  
 DS 2  
 SWH 8278.146 Hz  
 FIDRES 0.126314 Hz  
 AQ 3.9584243 sec  
 RG 11.3  
 DW 60.400 usec  
 DE 6.00 usec  
 TE 298.2 K  
 D1 1.00000000 sec  
 TD0 1

==== CHANNEL f1 =====  
 NUC1 1H  
 P1 15.00 usec  
 PL1 4.90 dB  
 PL1W 3.30822015 W  
 SFO1 400.1324710 MHz

F2 - Processing parameters  
 SI 32768  
 SF 400.1300000 MHz  
 WDW EM  
 SSB 0  
 LB 0.30 Hz  
 GB 0  
 PC 1.00

Compound 34, <sup>13</sup>CNMR

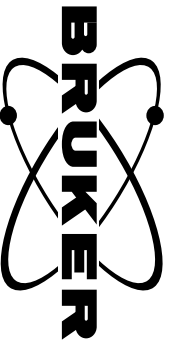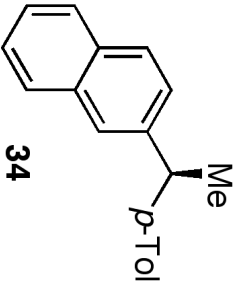

- 144.04
- 143.32
- 135.64
- 133.56
- 132.11
- 129.15
- 127.98
- 127.77
- 127.67
- 127.62
- 126.91
- 125.96
- 125.37
- 125.29

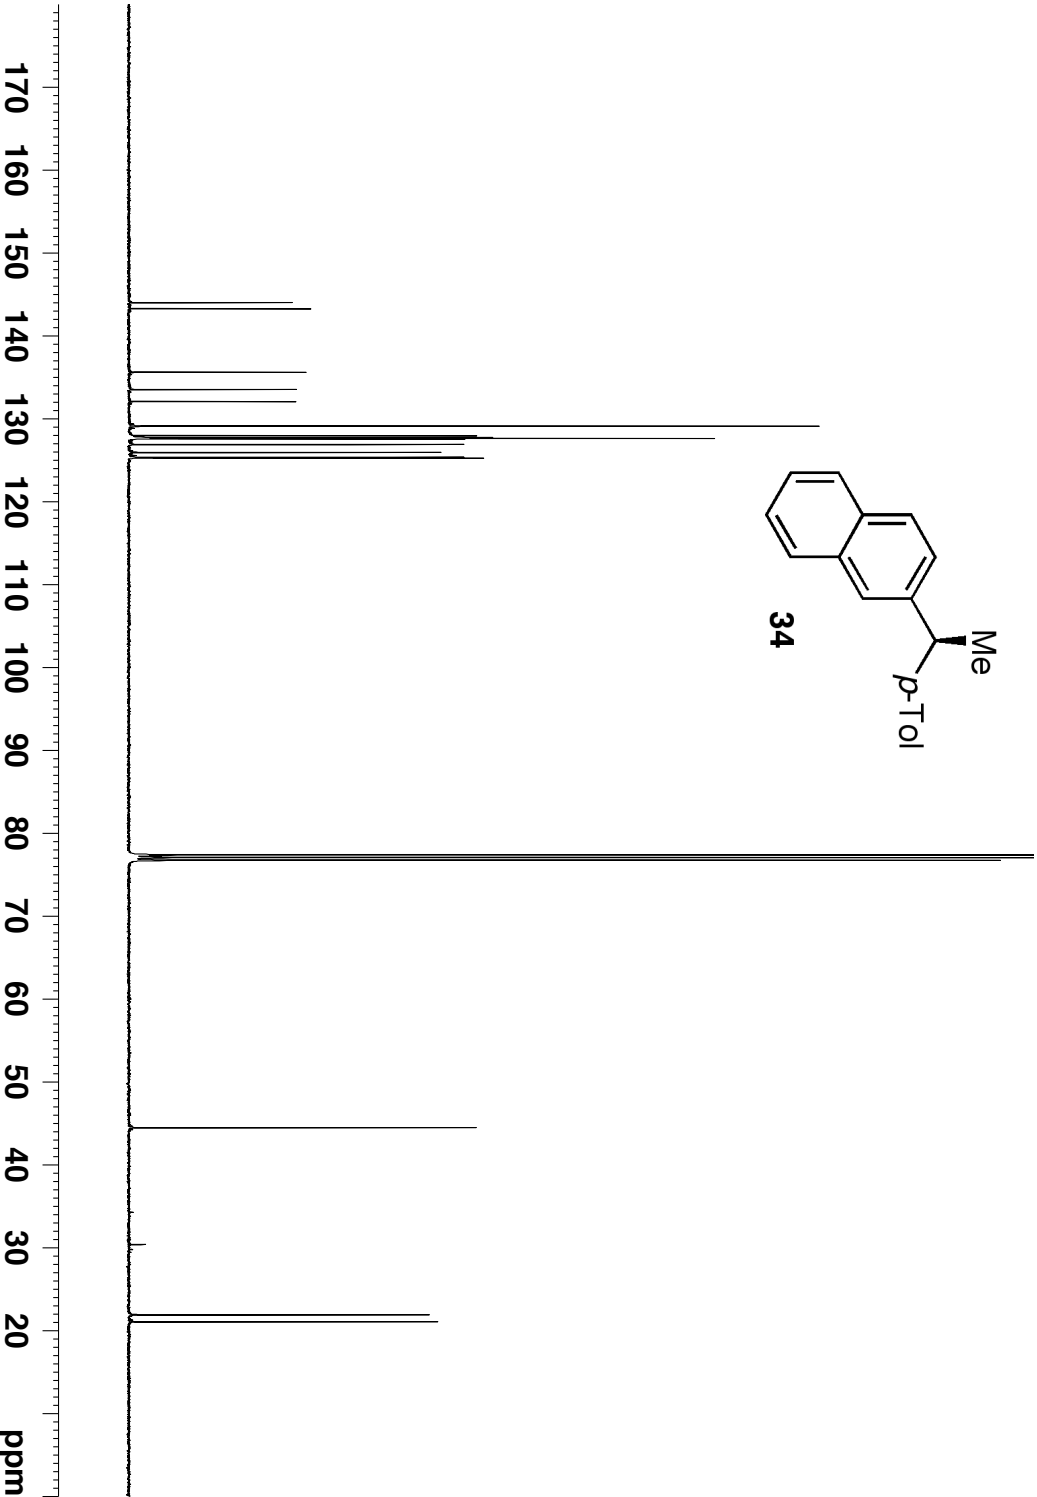

- 44.48
- 21.90
- 21.07

Current Data Parameters  
 NAME DM2-121-1  
 EXPNO 2  
 PROCNO 1

F2 - Acquisition Parameters  
 Date\_ 20120721  
 Time\_ 15.03

INSTRUM spect  
 PROBHD 5 mm CPQNP 1H/  
 PULPROG zgpg30  
 TD 65536  
 SOLVENT CDC13  
 NS 256  
 DS 4  
 SWH 23980.814 Hz  
 FIDRES 0.365918 Hz  
 AQ 1.3664756 sec  
 RG 512  
 DW 20.850 usec  
 DE 18.00 usec  
 TE 298.2 K  
 D1 2.00000000 sec  
 D11 0.03000000 sec  
 TD0 1

==== CHANNEL F1 =====  
 NUC1 13C  
 P1 9.25 usec  
 PL1 0.55 dB  
 PL1W 35.18820572 W  
 SFO1 100.6228298 MHz

==== CHANNEL F2 =====  
 CPDPRG2 waltz16  
 NUC2 1H  
 PCPD2 90.00 usec  
 PL2 4.90 dB  
 PL12 20.46 dB  
 PL13 21.00 dB  
 PL2W 3.30822015 W  
 PL12W 0.09195905 W  
 PL13W 0.08120718 W  
 SFO2 400.1316005 MHz

F2 - Processing parameters  
 SI 32768  
 SF 100.6127690 MHz  
 WDW EM  
 SSB 0  
 LB 1.00 Hz  
 GB 0  
 PC 1.40

Compound 35, <sup>1</sup>H NMR

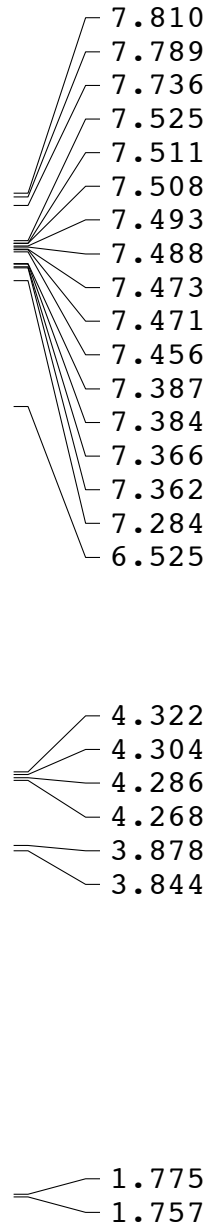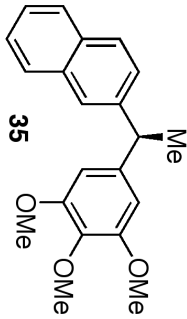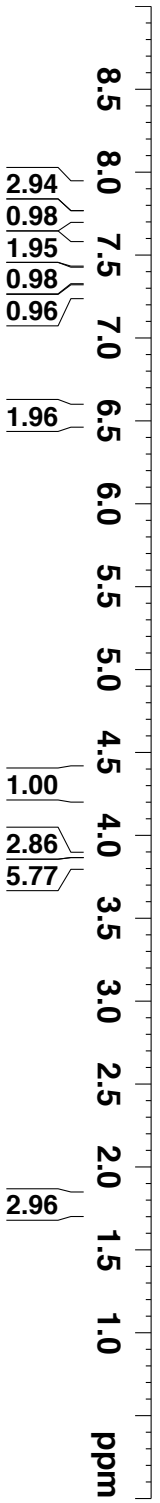

Current Data Parameters  
 NAME PM-4-47-3  
 EXPNO 1  
 PROCNO 1

F2 - Acquisition Parameters  
 Date\_ 20120807  
 Time\_ 11.05  
 INSTRUM spect  
 PROBHD 5 mm CPQNP 1H/  
 PULPROG zg30  
 TD 65536  
 SOLVENT CDCl3  
 NS 16  
 DS 2  
 SWH 8278.146 Hz  
 FIDRES 0.126314 Hz  
 AQ 3.9584243 sec  
 RG 7.1  
 DW 60.400 usec  
 DE 6.00 usec  
 TE 298.2 K  
 D1 1.00000000 sec  
 TD0 1

==== CHANNEL f1 =====  
 NUC1 1H  
 P1 15.00 usec  
 PL1 4.90 dB  
 PL1W 3.30822015 W  
 SFO1 400.1324710 MHz

F2 - Processing parameters  
 SI 32768  
 SF 400.1300000 MHz  
 WDW EM  
 SSB 0  
 LB 0.30 Hz  
 GB 0  
 PC 1.00

Compound 35, <sup>13</sup>CNMR

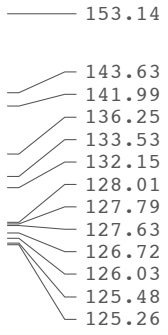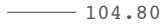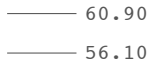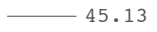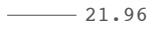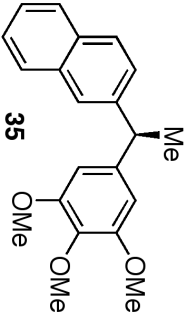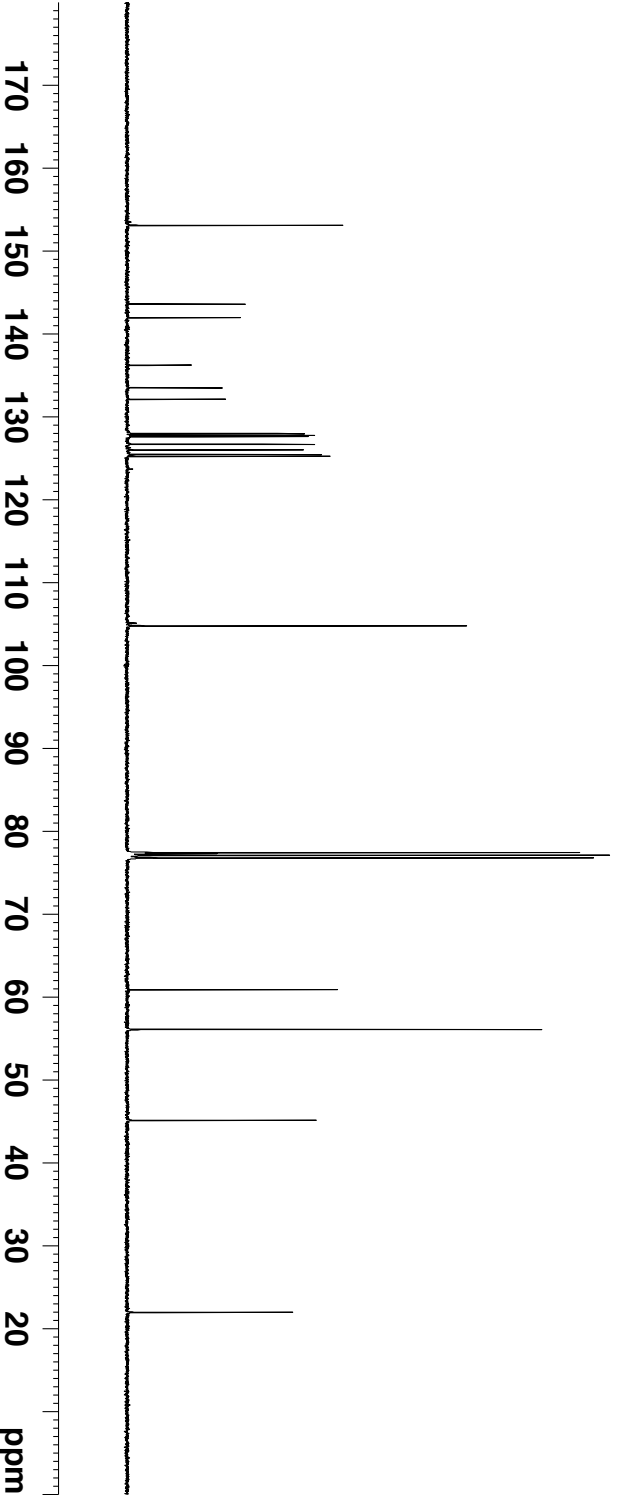

Current Data Parameters  
 NAME PM-4-47-3  
 EXPNO 2  
 PROCNO 1

F2 - Acquisition Parameters  
 Date\_ 20120807  
 Time\_ 11.08  
 INSTRUM spect  
 PROBHD 5 mm CPQNP 1H/  
 PULPROG zgpg30  
 TD 65536  
 SOLVENT CDCl3  
 NS 32  
 DS 4  
 SWH 23980.814 Hz  
 FIDRES 0.365918 Hz  
 AQ 1.3664756 sec  
 RG 512  
 DW 20.850 usec  
 DE 18.00 usec  
 TE 298.2 K  
 D1 2.00000000 sec  
 D11 0.03000000 sec  
 TD0 1

==== CHANNEL F1 =====  
 NUC1 13C  
 P1 9.25 usec  
 PL1 0.55 dB  
 PL1W 35.18820572 W  
 SF01 100.6228298 MHz

==== CHANNEL F2 =====  
 CPDPRG2 waltz16  
 NUC2 1H  
 PCPD2 90.00 usec  
 PL2 4.90 dB  
 PL12 20.46 dB  
 PL13 21.00 dB  
 PL12W 3.30822015 W  
 PL12W 0.09195905 W  
 PL13W 0.08120718 W  
 SF02 400.1316005 MHz

F2 - Processing parameters  
 SI 32768  
 SF 100.6127690 MHz  
 WDW EM  
 SSB 0  
 LB 1.00 Hz  
 GB 0  
 PC 1.40

Compound 36, <sup>1</sup>H NMR

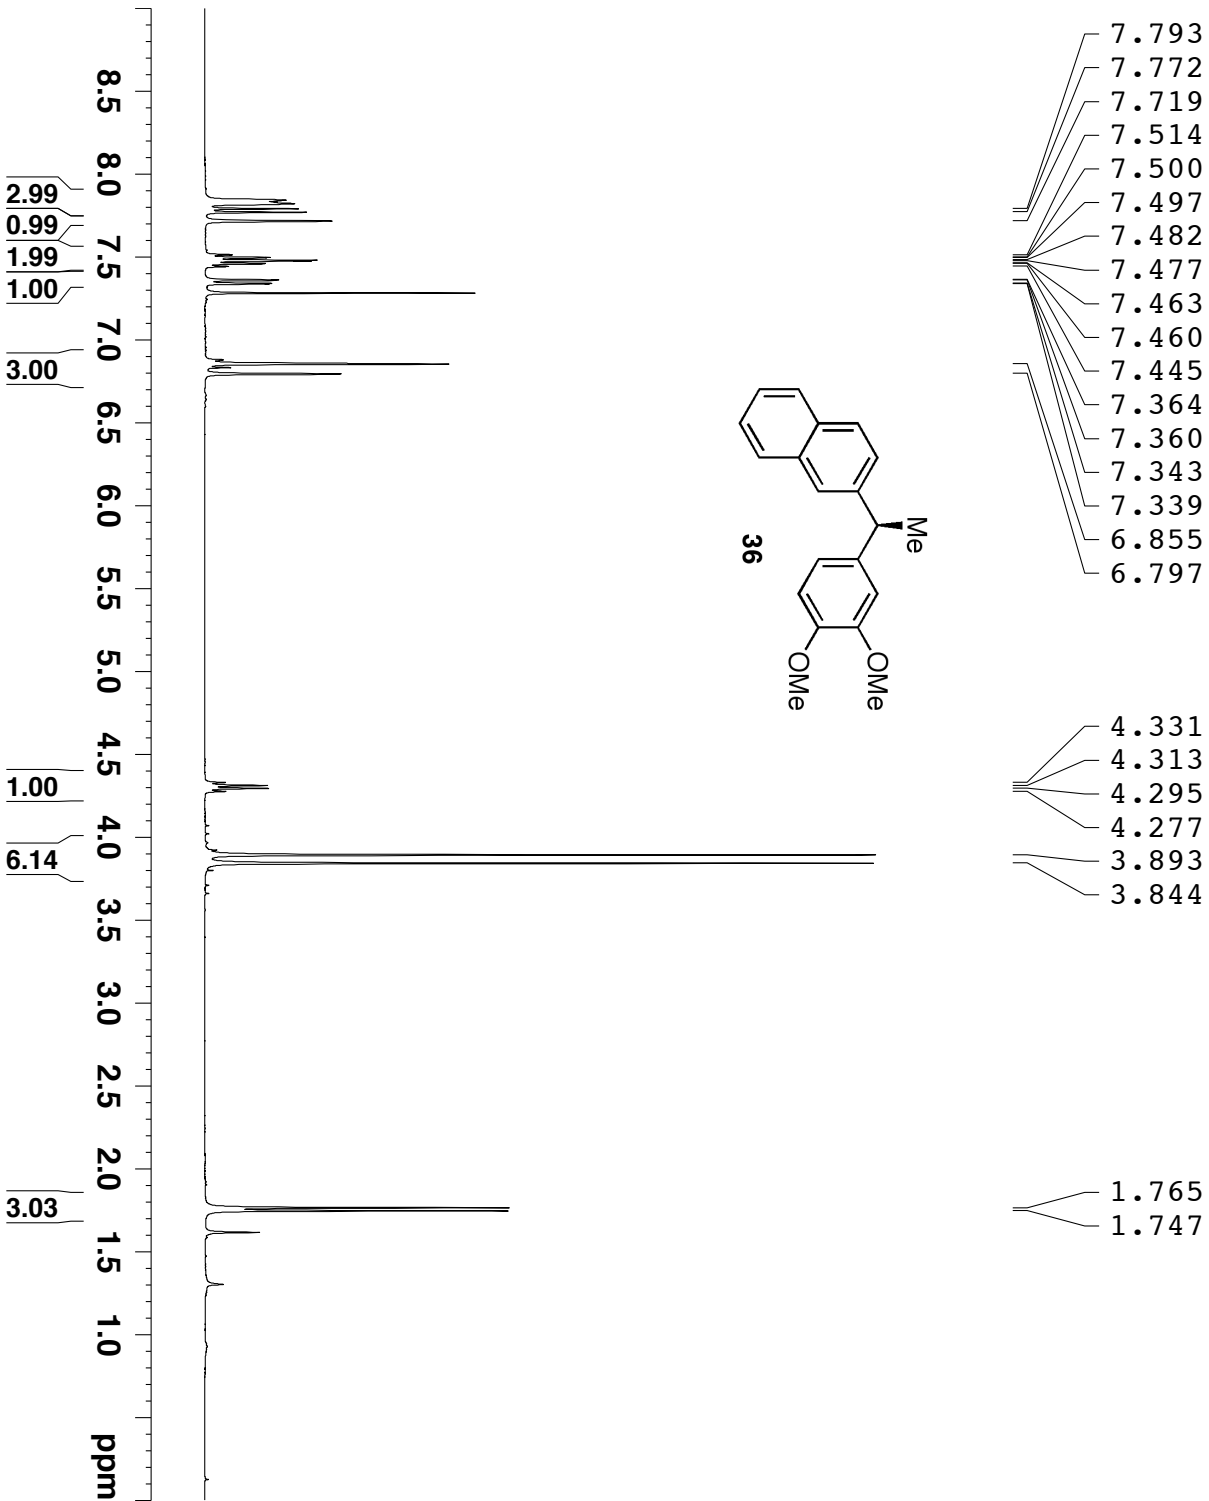

- 7.793
- 7.772
- 7.719
- 7.514
- 7.500
- 7.497
- 7.482
- 7.477
- 7.463
- 7.460
- 7.445
- 7.364
- 7.360
- 7.343
- 7.339
- 6.855
- 6.797
  
- 4.331
- 4.313
- 4.295
- 4.277
- 3.893
- 3.844
  
- 1.765
- 1.747

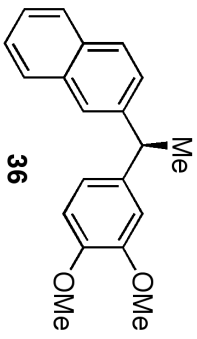

Current Data Parameters  
 NAME PM-4-30-4  
 EXPNO 1  
 PROCNO 1

F2 - Acquisition Parameters  
 Date\_ 20120803  
 Time\_ 12.39  
 INSTRUM spect  
 PROBHD 5 mm CPQNP 1H/  
 PULPROG zg30  
 TD 65536  
 SOLVENT CDCl3  
 NS 16  
 DS 2  
 SWH 8278.146 Hz  
 FIDRES 0.126314 Hz  
 AQ 3.9584243 sec  
 RG 7.1  
 DW 60.400 usec  
 DE 6.00 usec  
 TE 298.2 K  
 D1 1.00000000 sec  
 TD0 1

==== CHANNEL f1 =====  
 NUC1 1H  
 P1 15.00 usec  
 PL1 4.90 dB  
 PL1W 3.30822015 W  
 SFO1 400.1324710 MHz

F2 - Processing parameters  
 SI 32768  
 SF 400.1300000 MHz  
 WDW EM  
 SSB 0  
 LB 0.30 Hz  
 GB 0  
 PC 1.00

Compound 36, <sup>13</sup>CNMR

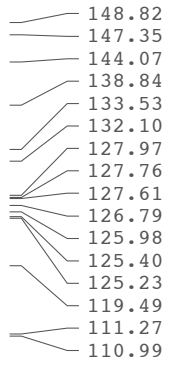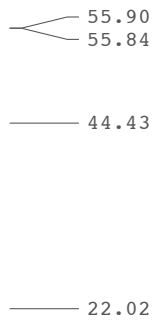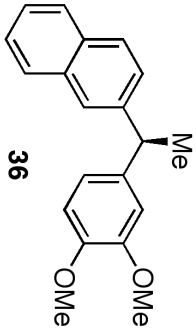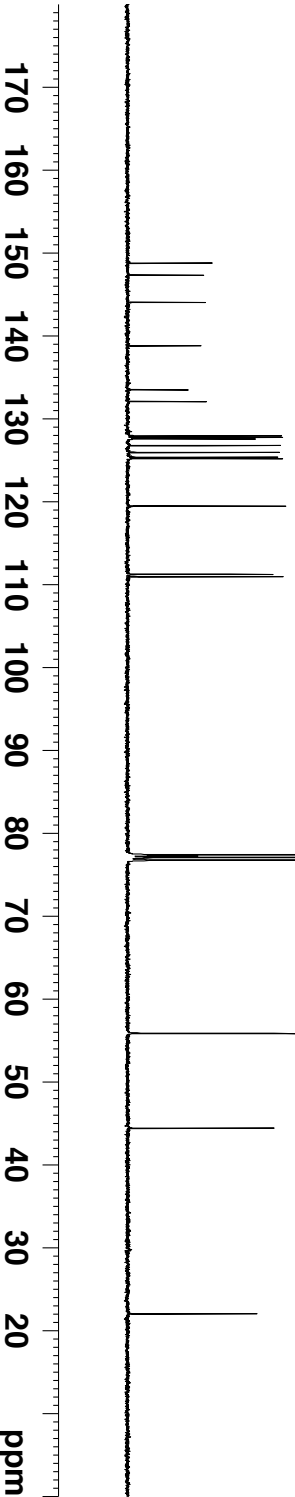

Current Data Parameters  
 NAME PM-4-30-4  
 EXPNO 2  
 PROCNO 1

F2 - Acquisition Parameters  
 Date\_ 20120803  
 Time\_ 12.42

INSTRUM spect  
 PROBHD 5 mm CPQNP 1H/  
 PULPROG zgpg30  
 TD 65536  
 SOLVENT CDC13  
 NS 32  
 DS 4

SWH 23980.814 Hz  
 FIDRES 0.365918 Hz  
 AQ 1.3664756 sec

RG 512  
 DW 20.850 usec  
 DE 18.00 usec  
 TE 298.2 K  
 D1 2.00000000 sec  
 D11 0.03000000 sec  
 TD0 1

==== CHANNEL F1 =====  
 NUC1 13C  
 P1 9.25 usec  
 PL1 0.55 dB  
 PL1W 35.18820572 W  
 SF01 100.6228298 MHz

==== CHANNEL F2 =====  
 CPDPRG2 waltz16  
 NUC2 1H  
 PCPD2 90.00 usec  
 PL2 4.90 dB  
 PL12 20.46 dB  
 PL13 21.00 dB  
 PL2W 3.30822015 W  
 PL12W 0.09195905 W  
 PL13W 0.08120718 W  
 SF02 400.1316005 MHz

F2 - Processing parameters  
 SI 32768  
 SF 100.6127690 MHz  
 WDM EM  
 SSB 0  
 LB 1.00 Hz  
 GB 0  
 PC 1.40

Compound 37, <sup>1</sup>H NMR

- 7.540
- 7.537
- 7.523
- 7.520
- 7.505
- 7.500
- 7.486
- 7.482
- 7.468
- 7.465
- 7.415
- 7.395
- 7.376
- 7.372
- 7.355
- 7.351
- 7.292
- 7.284
- 7.272
- 6.790
- 6.762
- 6.745
- 6.718
- 5.791
- 5.747
- 5.277
- 5.249
- 4.392
- 4.374
- 4.356
- 4.339

- 1.800
- 1.782

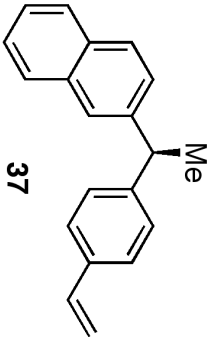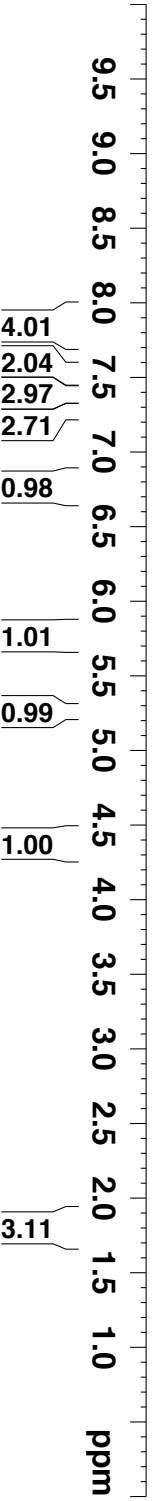

Current Data Parameters  
 NAME PM-4-79-3  
 EXPNO 1  
 PROCNO 1

F2 - Acquisition Parameters  
 Date\_ 20121010  
 Time\_ 1.12

INSTRUM spect  
 PROBHD 5 mm CPQNP 1H/  
 PULPROG zg30  
 TD 65536  
 SOLVENT CDCl3  
 NS 16  
 DS 2  
 SWH 8278.146 Hz  
 FIDRES 0.126314 Hz  
 AQ 3.9584243 sec  
 RG 9  
 DW 60.400 usec  
 DE 6.00 usec  
 TE 298.2 K  
 D1 1.00000000 sec  
 TD0 1

==== CHANNEL f1 =====  
 NUC1 1H  
 P1 15.00 usec  
 PL1 4.90 dB  
 PL1W 3.30822015 W  
 SFO1 400.1324710 MHz

F2 - Processing parameters  
 SI 32768  
 SF 400.1300000 MHz  
 WDW EM  
 SSB 0  
 LB 0.30 Hz  
 GB 0  
 PC 1.00



Compound 37, <sup>13</sup>CNMR



146.00  
143.69  
136.61  
135.56  
133.56  
132.15  
128.05  
127.99  
127.79  
127.64  
126.86  
126.34  
126.03  
125.46  
125.38  
113.36

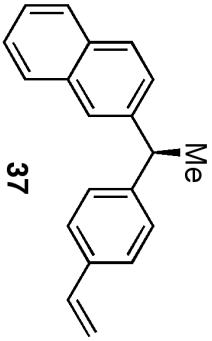

44.63  
21.77

170 160 150 140 130 120 110 100 90 80 70 60 50 40 30 20 ppm

Current Data Parameters  
NAME PM-4-79-3  
EXPNO 2  
PROCNO 1

F2 - Acquisition Parameters  
Date\_ 20121010  
Time\_ 1.28

INSTRUM spect  
PROBHD 5 mm CPQNP 1H/  
PULPROG zgpg30  
TD 65536  
SOLVENT CDC13  
NS 256  
DS 4  
SWH 23980.814 Hz  
FIDRES 0.365918 Hz  
AQ 1.3664756 sec  
RG 512  
DW 20.850 usec  
DE 18.00 usec  
TE 298.2 K  
D1 2.00000000 sec  
D11 0.03000000 sec  
TD0 1

==== CHANNEL F1 =====  
NUC1 13C  
P1 9.25 usec  
PL1 0.55 dB  
PL1W 35.18820572 W  
SFO1 100.6228298 MHz

==== CHANNEL F2 =====  
CPDPRG2 waltz16  
NUC2 1H  
PCPD2 90.00 usec  
PL2 4.90 dB  
PL12 20.46 dB  
PL13 21.00 dB  
PL12W 3.30822015 W  
PL12W 0.09195905 W  
PL13W 0.08120718 W  
SFO2 400.1316005 MHz

F2 - Processing parameters  
SI 32768  
SF 100.6127690 MHz  
WDW EM  
SSB 0  
LB 1.00 Hz  
GB 0  
PC 1.40





Compound 39, 1H NMR

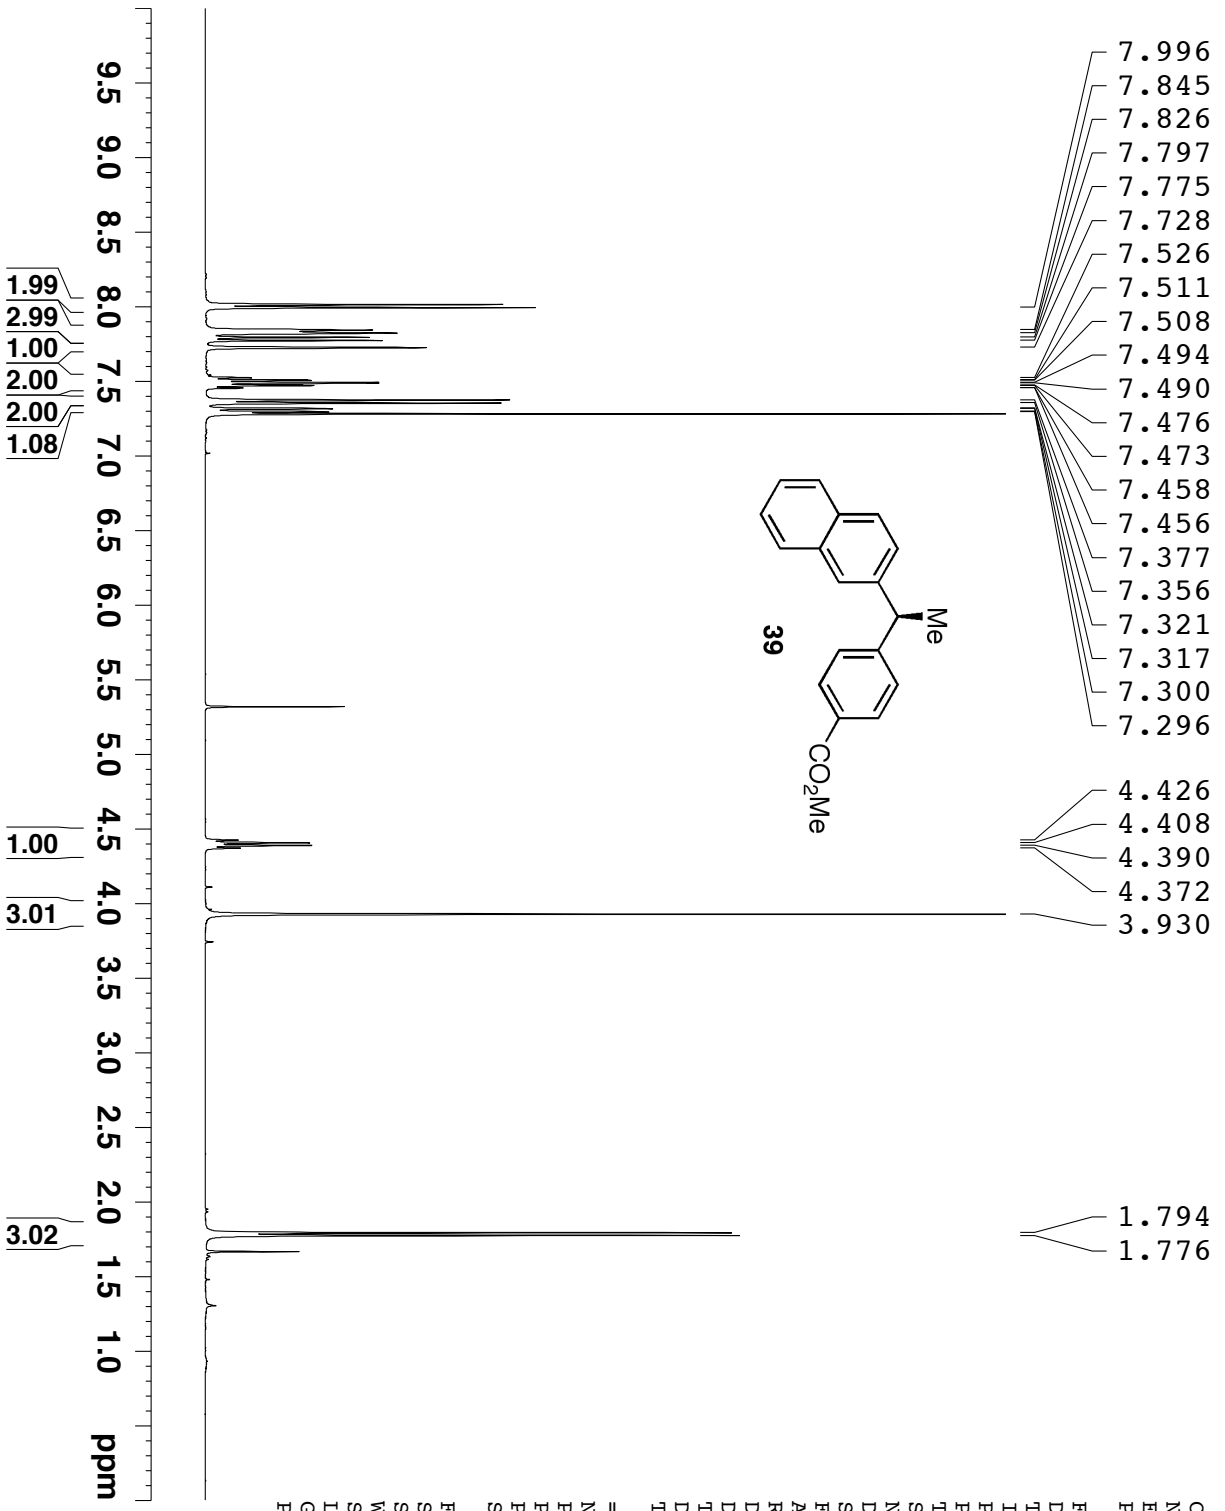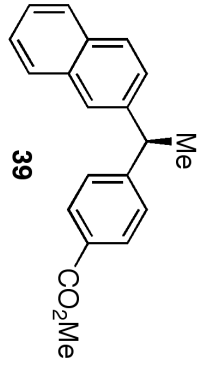

Current Data Parameters  
 NAME DM-3-186-1  
 EXPNO 1  
 PROCNO 1

F2 - Acquisition Parameters  
 Date\_ 20121024  
 Time\_ 17.39

INSTRUM spect  
 PROBHD 5 mm CPQNP 1H/  
 PULPROG zg30  
 TD 65536  
 SOLVENT CDCl3  
 NS 16  
 DS 2  
 SWH 8278.146 Hz  
 FIDRES 0.126314 Hz  
 AQ 3.9584243 sec  
 RG 9  
 DW 60.400 usec  
 DE 6.00 usec  
 TE 298.1 K  
 D1 1.00000000 sec  
 TD0 1

==== CHANNEL f1 =====  
 NUC1 1H  
 P1 15.00 usec  
 PL1 4.90 dB  
 PL1W 3.30822015 W  
 SFO1 400.1324710 MHz

F2 - Processing parameters  
 SI 32768  
 SF 400.1300000 MHz  
 WDW EM  
 SSB 0  
 LB 0.30 Hz  
 GB 0  
 PC 1.00

Compound 39, <sup>13</sup>CNMR

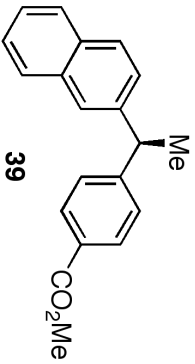

167.10  
151.61  
142.86  
133.51  
132.19  
129.83  
128.19  
128.10  
127.86  
127.77  
127.64  
126.65  
126.15  
125.62  
125.51

52.08  
44.92  
21.56

170 160 150 140 130 120 110 100 90 80 70 60 50 40 30 20 ppm

Current Data Parameters  
NAME DM-3-186-1  
EXPNO 2  
PROCNO 1

F2 - Acquisition Parameters  
Date\_ 20121024  
Time 17.43

INSTRUM spect  
PROBHD 5 mm CPQNP 1H/  
PULPROG zgpg30  
TD 65536  
SOLVENT CDC13  
NS 32  
DS 4

SWH 23980.814 Hz  
FIDRES 0.365918 Hz  
AQ 1.3664756 sec

RG 512  
DE 20.850 usec  
TE 18.00 usec  
D1 298.2 K  
D11 2.00000000 sec  
TD0 0.03000000 sec  
1

==== CHANNEL F1 =====  
NUC1 13C

P1 9.25 usec  
PL1 0.55 dB  
PL1W 35.18820572 W  
SFO1 100.6228298 MHz

==== CHANNEL F2 =====  
CPDPRG2 waltz16  
NUC2 1H

PCPD2 90.00 usec  
PL2 4.90 dB  
PL12 20.46 dB  
PL13 21.00 dB  
PL12W 3.30822015 W  
PL13W 0.09195905 W  
SFO2 400.1316005 MHz

F2 - Processing parameters  
SI 32768  
SF 100.6127690 MHz  
WDW EM  
SSB 0  
LB 1.00 Hz  
GB 0  
PC 1.40

Compound 40, <sup>1</sup>H NMR



S111

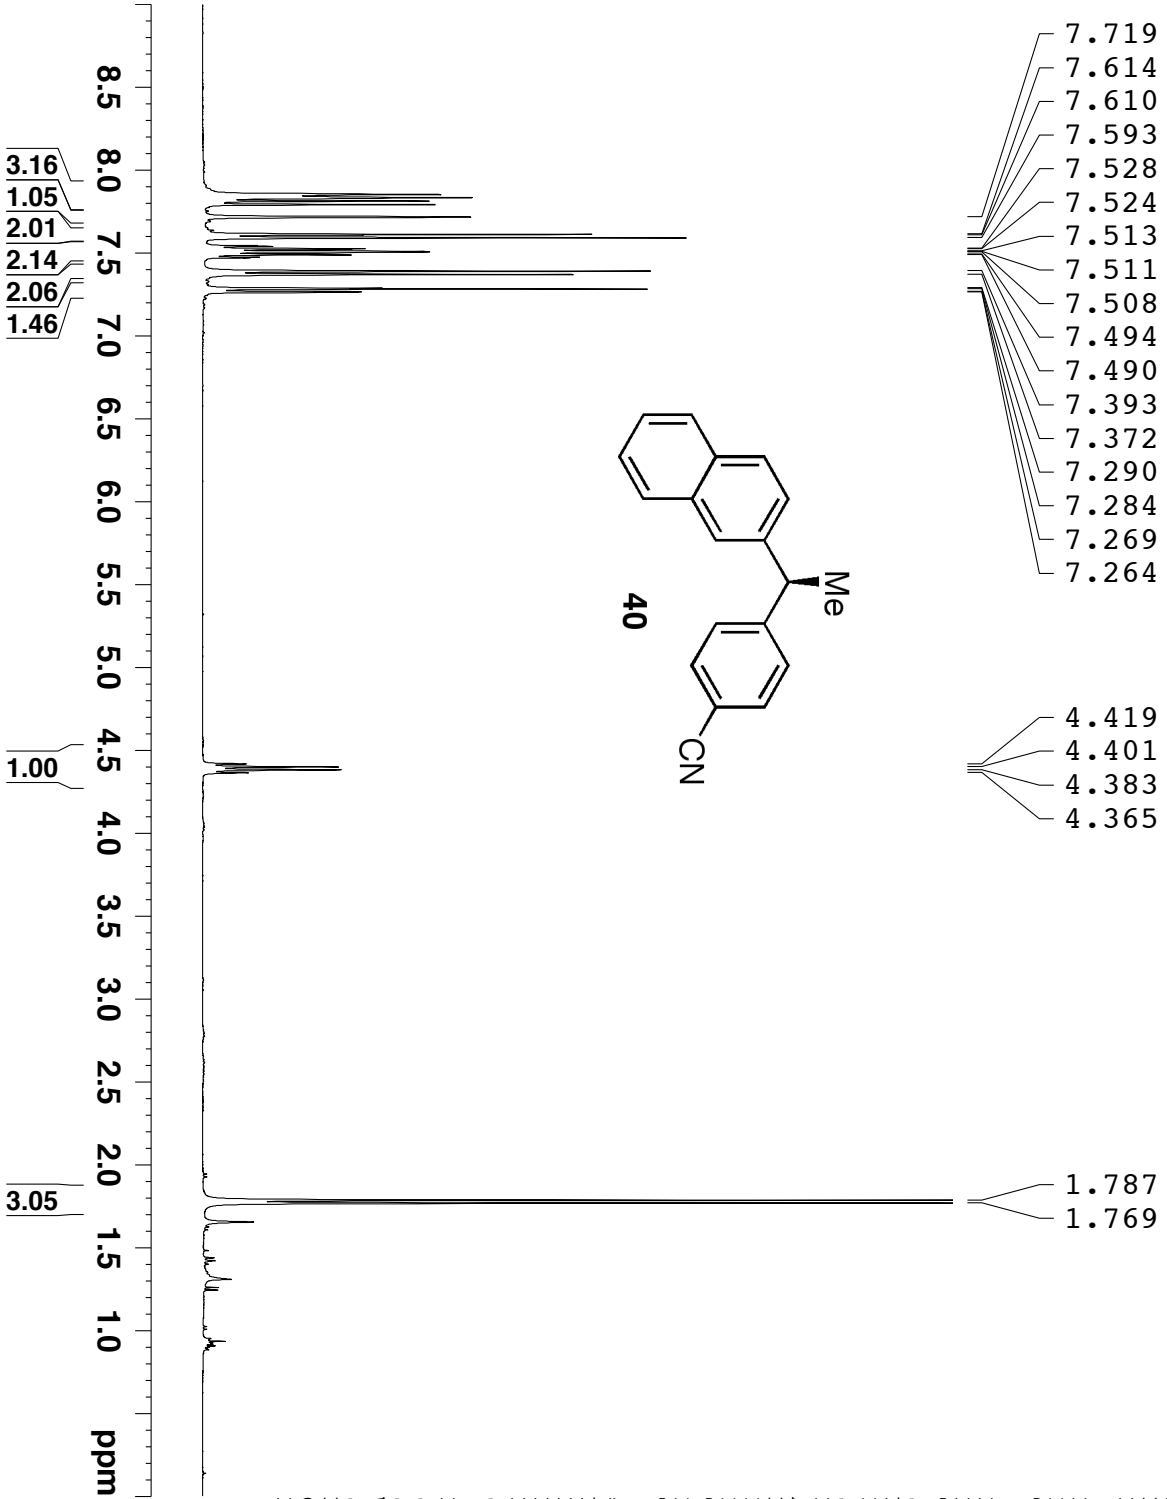

Current Data Parameters  
 NAME PM-4-79-1  
 EXPNO 1  
 PROCNO 1

F2 - Acquisition Parameters  
 Date\_ 20121003  
 Time\_ 11.49  
 INSTRUM spect  
 PROBHD 5 mm CPQNP 1H/  
 PULPROG zg30  
 TD 65536  
 SOLVENT CDCl3  
 NS 16  
 DS 2  
 SWH 8278.146 Hz  
 FIDRES 0.126314 Hz  
 AQ 3.9584243 sec  
 RG 4  
 DW 60.400 usec  
 DE 6.00 usec  
 TE 298.2 K  
 D1 1.00000000 sec  
 TD0 1

==== CHANNEL f1 =====  
 NUC1 1H  
 P1 15.00 usec  
 PL1 4.90 dB  
 PL1W 3.30822015 W  
 SFO1 400.1324710 MHz

F2 - Processing parameters  
 SI 32768  
 SF 400.1300000 MHz  
 WDW EM  
 SSB 0  
 LB 0.30 Hz  
 GB 0  
 PC 1.00

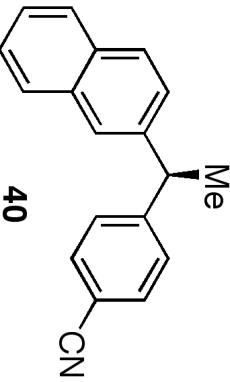

Compound 40, <sup>13</sup>CNMR



151.80  
142.07  
133.49  
132.34  
132.28  
128.60  
128.41  
127.77  
127.68  
126.43  
126.33  
125.84  
125.62  
119.09  
110.00

44.99  
21.41

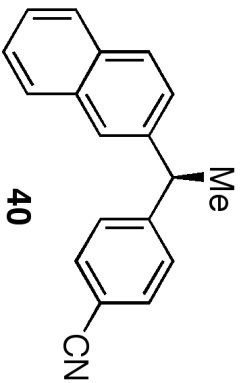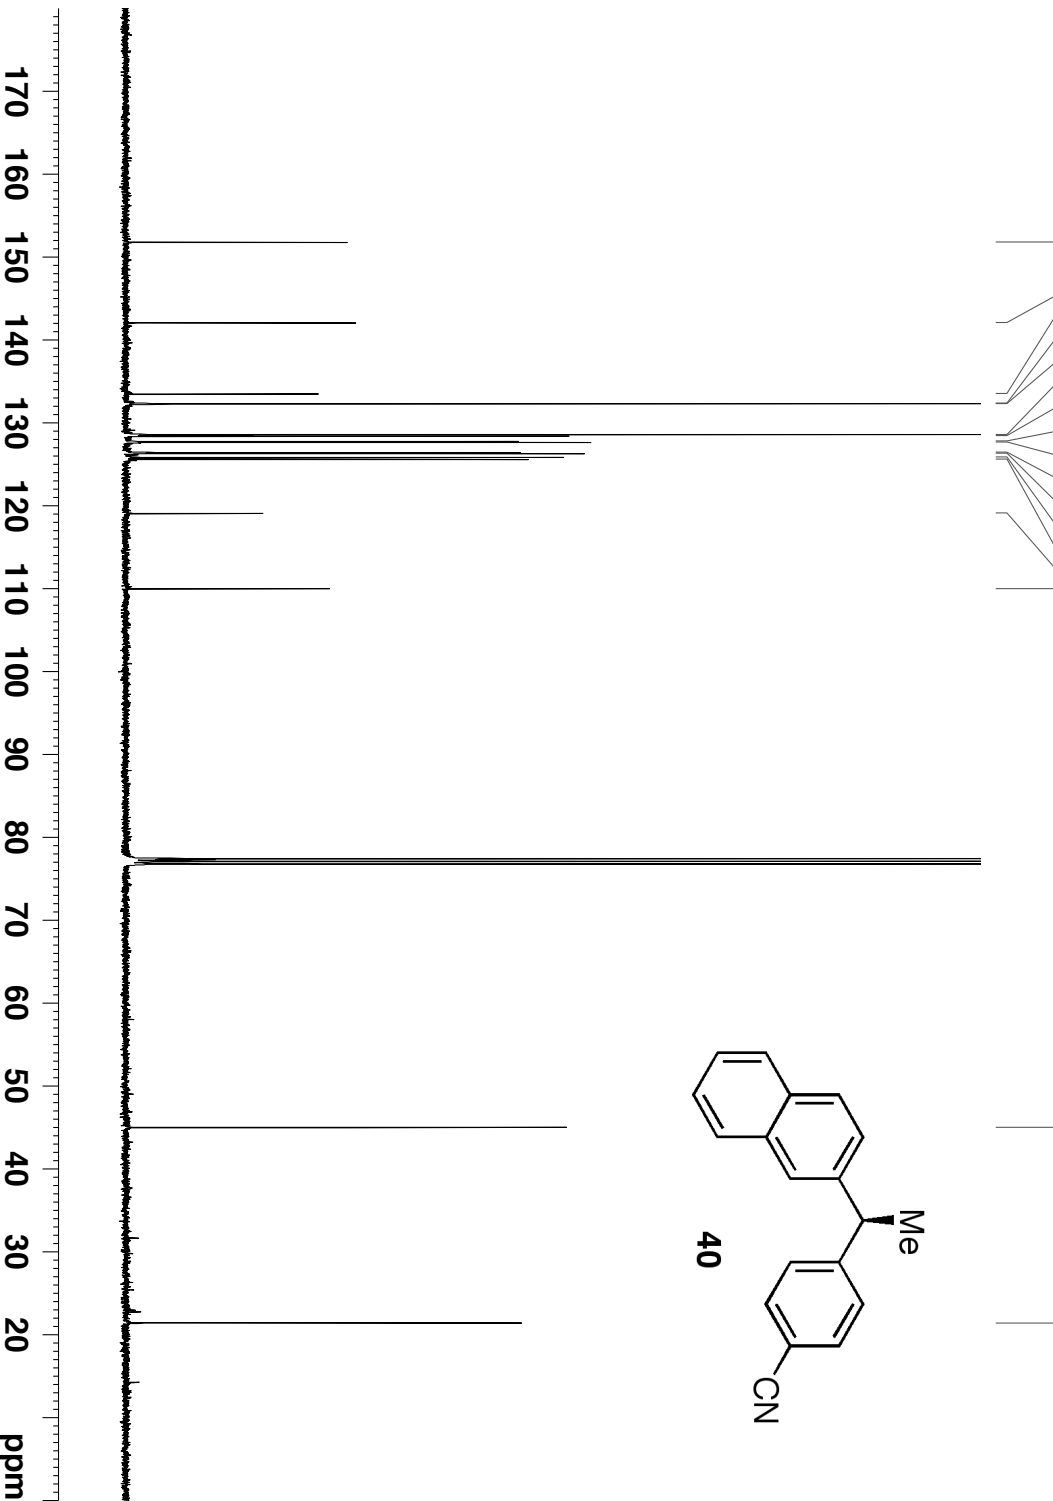

Current Data Parameters  
NAME PM-4-79-1  
EXPNO 2  
PROCNO 1

F2 - Acquisition Parameters

Date\_ 20121003  
Time\_ 11.53  
INSTRUM spect  
PROBHD 5 mm CPQNP 1H/  
PULPROG zgpg30  
TD 65536  
SOLVENT CDCl3  
NS 32  
DS 4  
SWH 23980.814 Hz  
FIDRES 0.365918 Hz  
AQ 1.3664756 sec  
RG 512  
DW 20.850 usec  
DE 18.00 usec  
TE 298.2 K  
D1 2.00000000 sec  
D11 0.03000000 sec  
TD0 1

==== CHANNEL f1 =====  
NUC1 13C  
P1 9.25 usec  
PL1 0.55 dB  
PL1W 35.18820572 W  
SF01 100.6228298 MHz

==== CHANNEL f2 =====  
CPDPRG2 waltz16  
NUC2 1H  
PCPD2 90.00 usec  
PL2 4.90 dB  
PL12 20.46 dB  
PL13 21.00 dB  
PL12W 3.30822015 W  
PL12W 0.09195905 W  
PL13W 0.08120718 W  
SF02 400.1316005 MHz

F2 - Processing parameters  
SI 32768  
SF 100.6127690 MHz  
WDW EM  
SSB 0  
LB 1.00 Hz  
GB 0  
PC 1.40

Compound 41, <sup>1</sup>H NMR



Current Data Parameters  
 NAME PM-4-85-2-rerun  
 EXPNO 1  
 PROCNO 1

F2 - Acquisition Parameters  
 Date\_ 20121019  
 Time\_ 16.39  
 INSTRUM spect  
 PROBHD 5 mm CPQNP 1H/  
 PULPROG zg30  
 TD 65536  
 SOLVENT CDCl3  
 NS 16  
 DS 2  
 SWH 8278.146 Hz  
 FIDRES 0.126314 Hz  
 AQ 3.9584243 sec  
 RG 9  
 DW 60.400 usec  
 DE 6.00 usec  
 TE 298.2 K  
 D1 1.00000000 sec  
 TD0 1

==== CHANNEL f1 =====  
 NUC1 1H  
 P1 15.00 usec  
 PL1 4.90 dB  
 PL1W 3.30822015 W  
 SFO1 400.1324710 MHz

F2 - Processing parameters  
 SI 32768  
 SF 400.1300000 MHz  
 WDW EM  
 SSB 0  
 LB 0.30 Hz  
 GB 0  
 PC 1.00

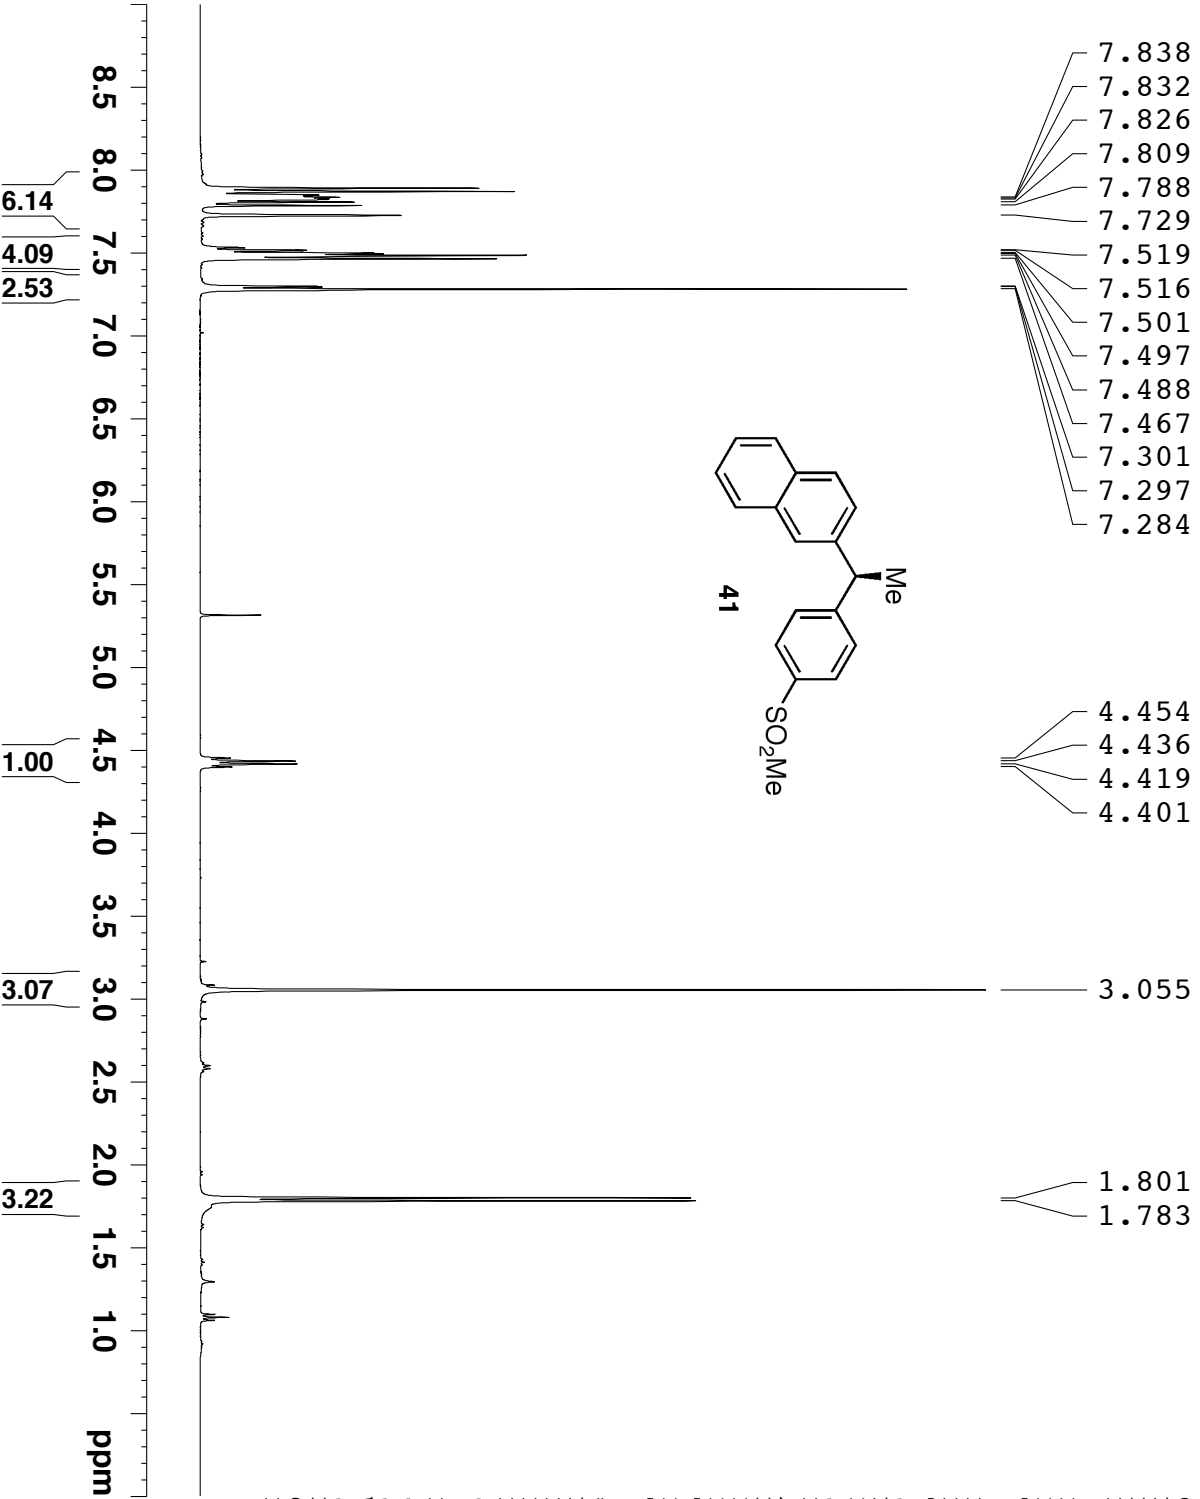

Compound 41, <sup>13</sup>CNMR

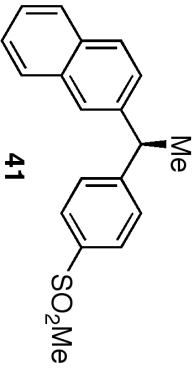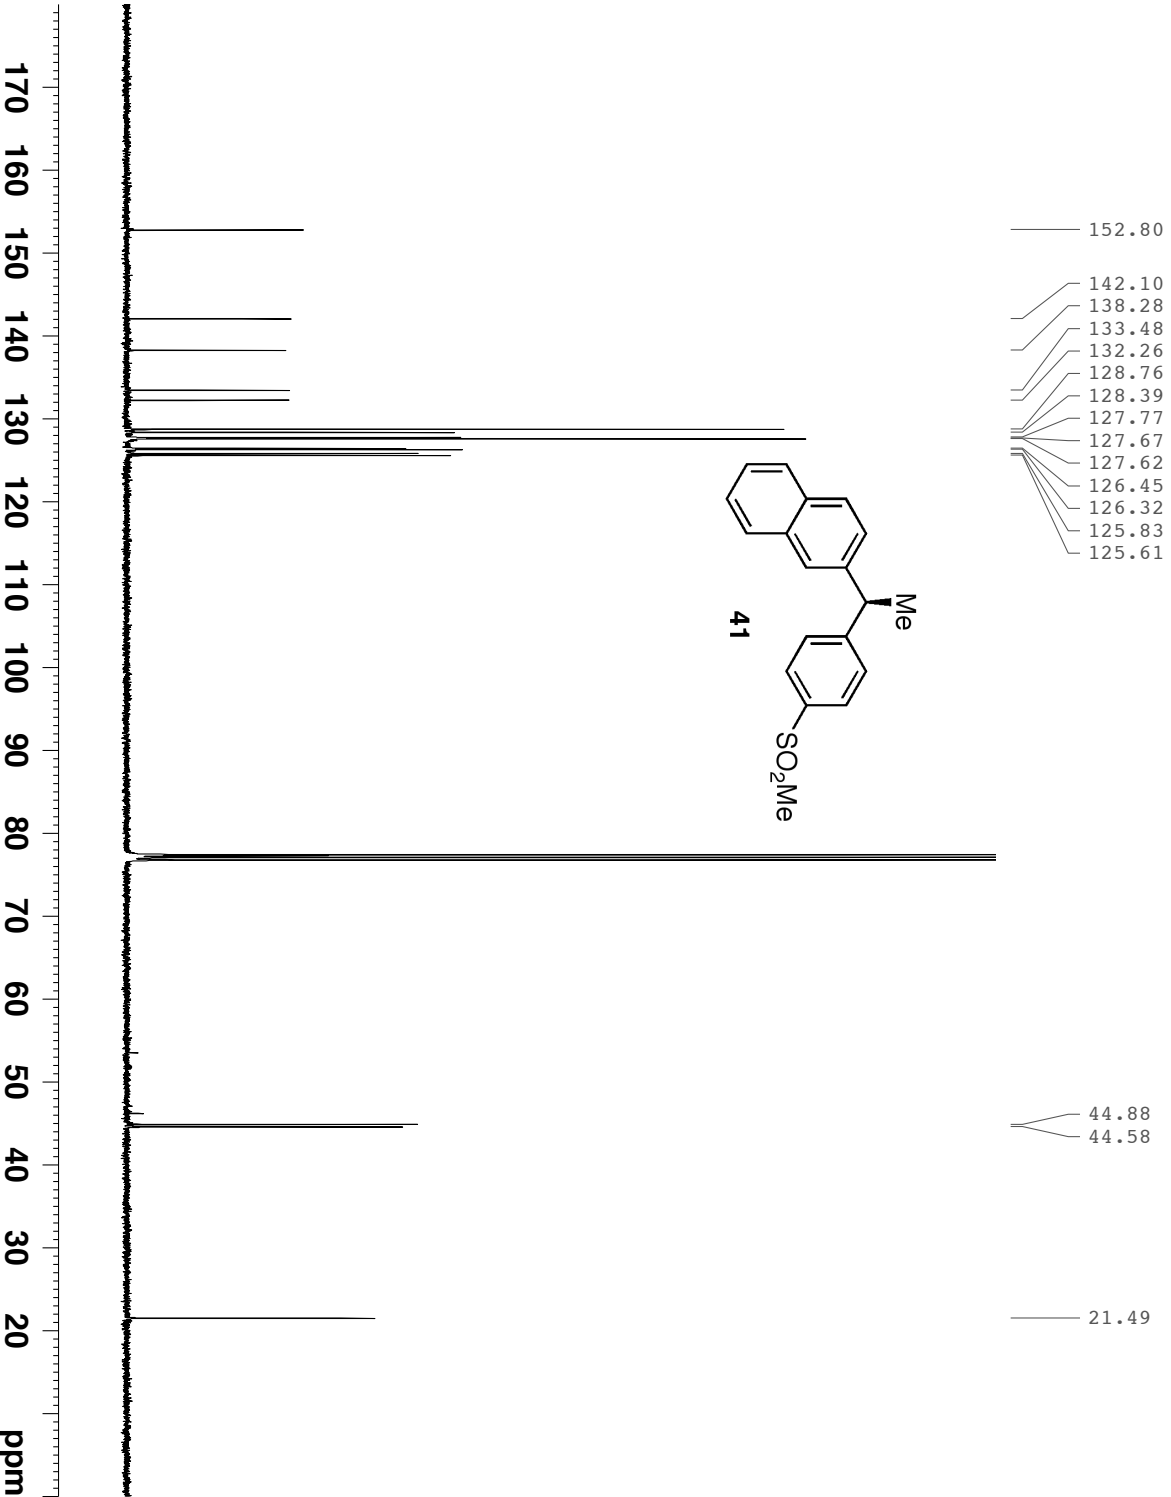

152.80  
142.10  
138.28  
133.48  
132.26  
128.76  
128.39  
127.77  
127.67  
127.62  
126.45  
126.32  
125.83  
125.61

44.88  
44.58

21.49

Current Data Parameters  
NAME PY-4-85-2-rerun  
EXPNO 2  
PROCNO 1

F2 - Acquisition Parameters  
Date\_ 20121019  
Time\_ 16.42

INSTRUM spect  
PROBHD 5 mm CPQNP 1H/  
PULPROG zgpg30  
TD 65536  
SOLVENT CDC13  
NS 32  
DS 4

SWH 23980.814 Hz  
FIDRES 0.365918 Hz  
AQ 1.3664756 sec  
RG 512  
DW 20.850 usec  
DE 18.00 usec  
TE 298.1 K  
D1 2.00000000 sec  
D11 0.03000000 sec  
TD0 1

==== CHANNEL F1 =====  
NUC1 13C  
P1 9.25 usec  
PL1 0.55 dB  
PL1W 35.18820572 W  
SF01 100.6228298 MHz

==== CHANNEL F2 =====  
CPDPRG2 waltz16  
NUC2 1H  
PCPD2 90.00 usec  
PL2 4.90 dB  
PL12 20.46 dB  
PL13 21.00 dB  
PL12W 3.30822015 W  
PL12W 0.09195905 W  
PL13W 0.08120718 W  
SF02 400.1316005 MHz

F2 - Processing parameters  
SI 32768  
SF 100.6127690 MHz  
WDW EM  
SSB 0  
LB 1.00 Hz  
GB 0  
PC 1.40

Compound 42, <sup>1</sup>H NMR

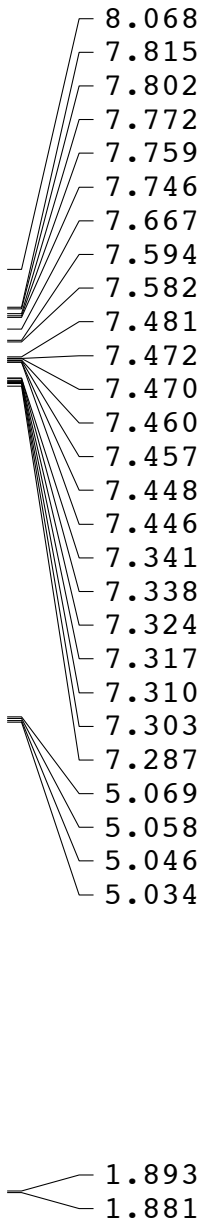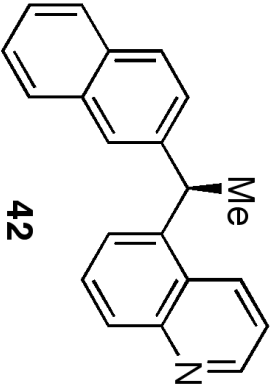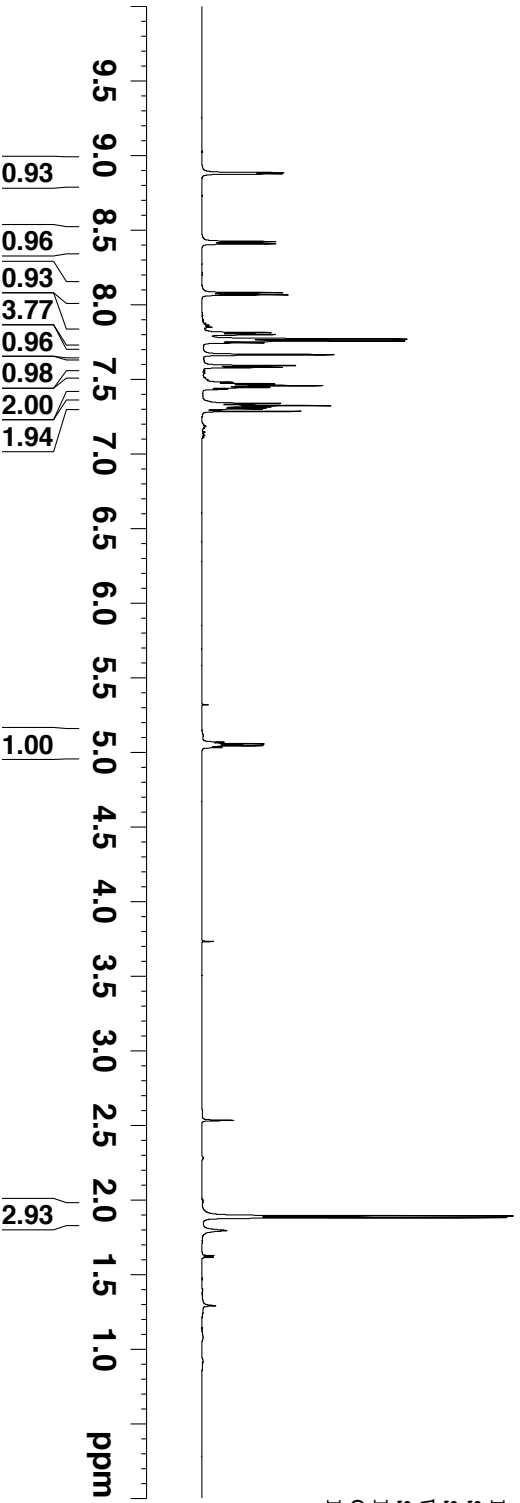

Current Data Parameters  
 NAME PM-4-94  
 EXPNO 1  
 PROCNO 1

F2 - Acquisition Parameters  
 Date\_ 20121101  
 Time\_ 9.41  
 INSTRUM spect  
 PROBHD 5 mm PABBO BB/  
 PULPROG zg30  
 TD 65536  
 SOLVENT CDCl3  
 NS 8  
 DS 2  
 SWH 8403.361 Hz  
 FIDRES 0.128225 Hz  
 AQ 3.8994420 sec  
 RG 114  
 DW 59.500 usec  
 DE 17.39 usec  
 TE 298.0 K  
 D1 1.00000000 sec  
 TD0 1

==== CHANNEL f1 =====  
 SF01 600.3233018 MHz  
 NUC1 1H  
 P1 10.77 usec

F2 - Processing parameters  
 SI 65536  
 SF 600.3200000 MHz  
 WDW EM  
 SSB 0  
 LB 0.30 Hz  
 GB 0  
 PC 1.00

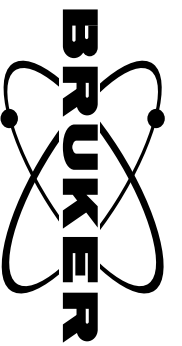

Compound 42, <sup>13</sup>CNMR



S116

Current Data Parameters  
 NAME PM-4-94  
 EXPNO 2  
 PROCNO 1

F2 - Acquisition Parameters  
 Date\_ 20121101  
 Time\_ 9.51

INSTRUM spect  
 PROBHD 5 mm PABBO BB/  
 PULPROG zgpg55  
 TD 65536  
 SOLVENT CDCl3  
 NS 256  
 DS 4  
 SWH 34722.223 Hz  
 FIDRES 0.529819 Hz  
 AQ 0.9437684 sec  
 RG 2050  
 DW 14.400 usec  
 DE 19.34 usec  
 TE 298.0 K  
 D1 1.10000002 sec  
 D11 0.03000000 sec  
 TD0 1

==== CHANNEL f1 =====  
 SF01 150.9656784 MHz  
 NUC1 13C  
 P1 10.63 usec

F2 - Processing parameters  
 SI 32768  
 SF 150.9505840 MHz  
 WDW EM  
 SSB 0  
 LB 1.00 Hz  
 GB 0  
 PC 1.40

- 149.81
- 148.95
- 143.72
- 141.76
- 133.58
- 132.43
- 132.15
- 129.07
- 128.55
- 128.31
- 127.71
- 127.61
- 126.91
- 126.46
- 126.10
- 125.55
- 125.01
- 120.82

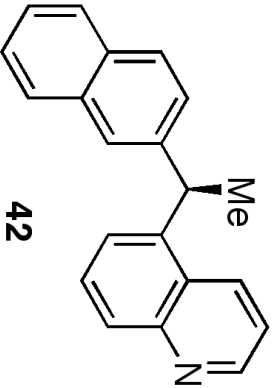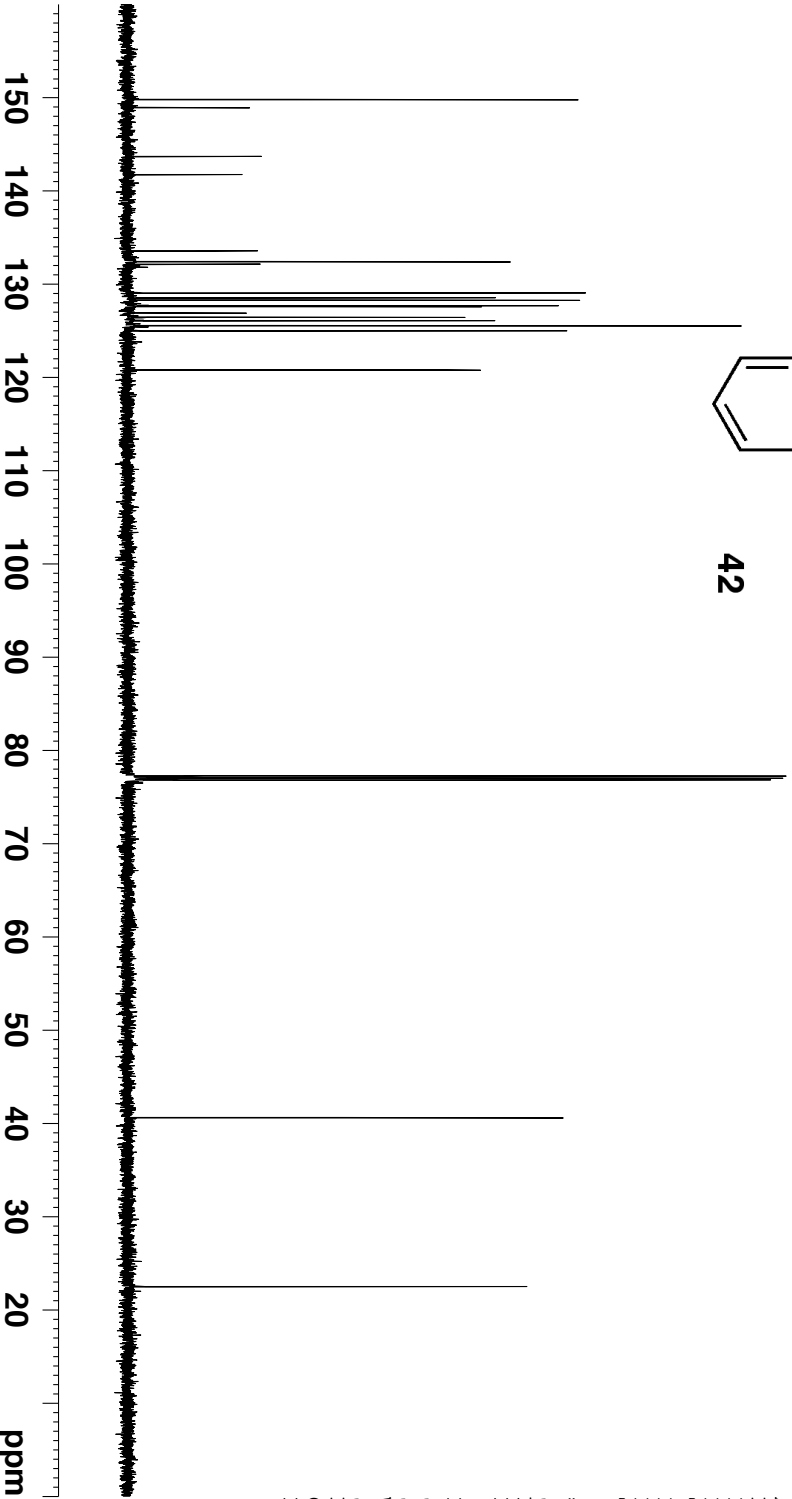



Compound 43, <sup>1</sup>H NMR

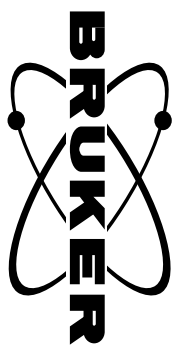

S117

Current Data Parameters  
 NAME PM-4-31-1  
 EXPNO 1  
 PROCNO 1

F2 - Acquisition Parameters  
 Date\_ 20120720  
 Time 15.25

INSTRUM spect  
 PROBHD 5 mm CPQNP 1H/  
 PULPROG zg30  
 TD 65536  
 SOLVENT CDCl3  
 NS 16  
 DS 2  
 SWH 8278.146 Hz  
 FIDRES 0.126314 Hz  
 AQ 3.9584243 sec  
 RG 12.7  
 DW 60.400 usec  
 DE 6.00 usec  
 TE 298.1 K  
 D1 1.00000000 sec  
 TD0 1

==== CHANNEL f1 =====  
 NUC1 1H  
 P1 15.00 usec  
 PL1 4.90 dB  
 PL1W 3.30822015 W  
 SFO1 400.1324710 MHz

F2 - Processing parameters  
 SI 32768  
 SF 400.1300000 MHz  
 WDW EM  
 SSB 0  
 LB 0.30 Hz  
 GB 0  
 PC 1.00

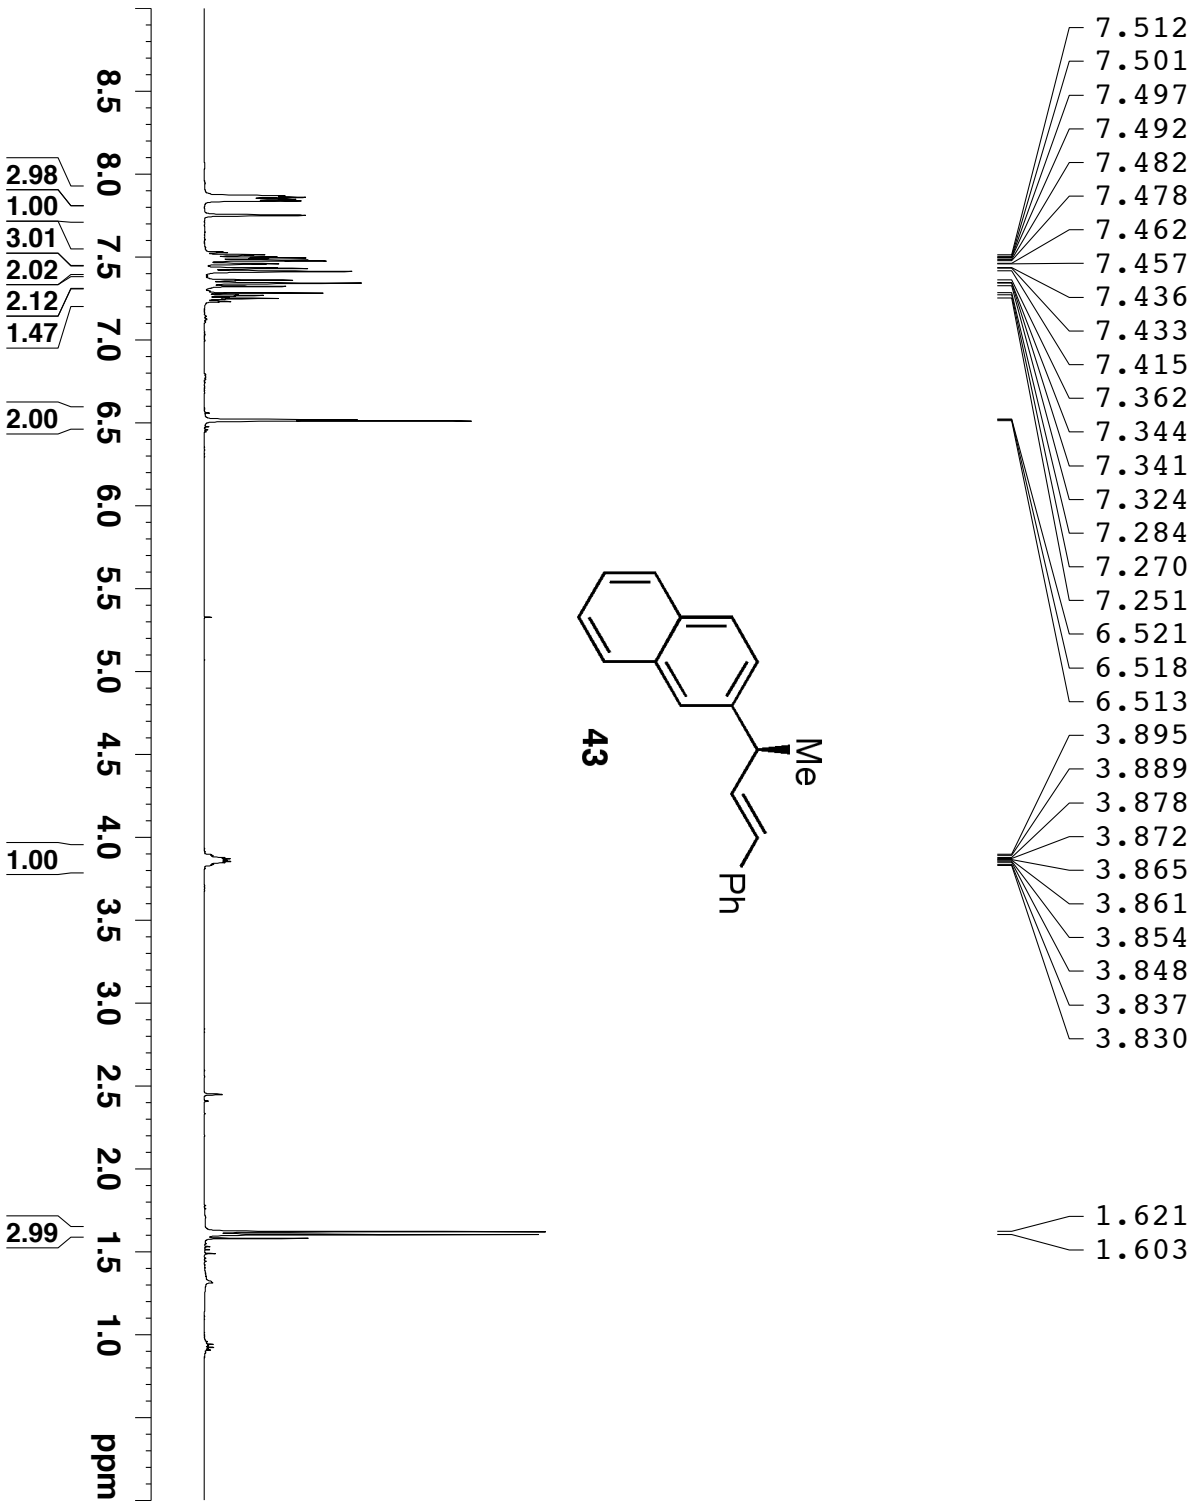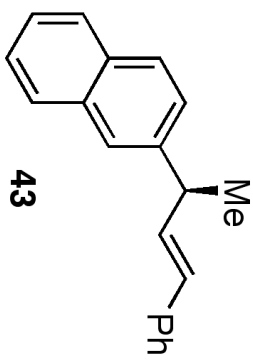

Compound 43, <sup>13</sup>C NMR

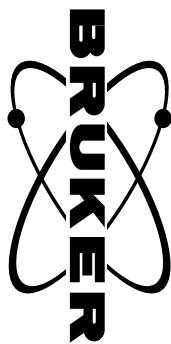

- 143.07
- 137.56
- 135.11
- 133.67
- 132.28
- 128.84
- 128.57
- 128.10
- 127.71
- 127.65
- 127.15
- 126.40
- 126.22
- 126.01
- 125.41
- 125.28

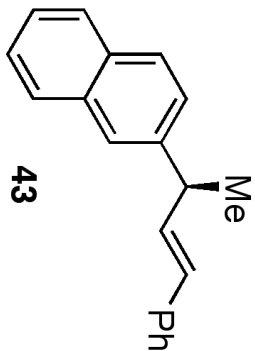

42.68

21.18

Current Data Parameters  
 NAME PM-4-31-1  
 EXPNO 2  
 PROCNO 1

F2 - Acquisition Parameters  
 Date\_ 20120720  
 Time\_ 21.51

INSTRUM spect  
 PROBHD 5 mm CPQNP 1H/  
 PULPROG zgpg30  
 TD 65536  
 SOLVENT CDCl3  
 NS 256  
 DS 4

SWH 23980.814 Hz  
 FIDRES 0.365918 Hz  
 AQ 1.3664756 sec

RG 512  
 DW 20.850 usec  
 DE 18.00 usec  
 TE 298.2 K  
 D1 2.00000000 sec  
 D11 0.03000000 sec  
 TD0 1

==== CHANNEL F1 =====  
 NUC1 13C  
 P1 9.25 usec  
 PL1 0.55 dB  
 PL1W 35.18820572 W  
 SFO1 100.6228298 MHz

==== CHANNEL F2 =====  
 CPDPRG2 waltz16  
 NUC2 1H  
 PCPD2 90.00 usec  
 PL2 4.90 dB  
 PL12 20.46 dB  
 PL13 21.00 dB  
 PL12W 3.30822015 W  
 PL12W 0.09195905 W  
 PL13W 0.08120718 W  
 SFO2 400.1316005 MHz

F2 - Processing parameters  
 SI 32768  
 SF 100.6127690 MHz  
 WDW EM  
 SSB 0  
 LB 1.00 Hz  
 GB 0  
 PC 1.40

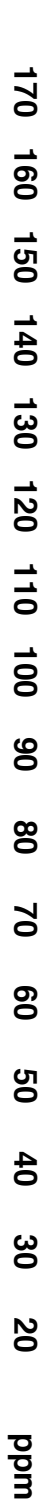

Compound 44, <sup>1</sup>H NMR



S119

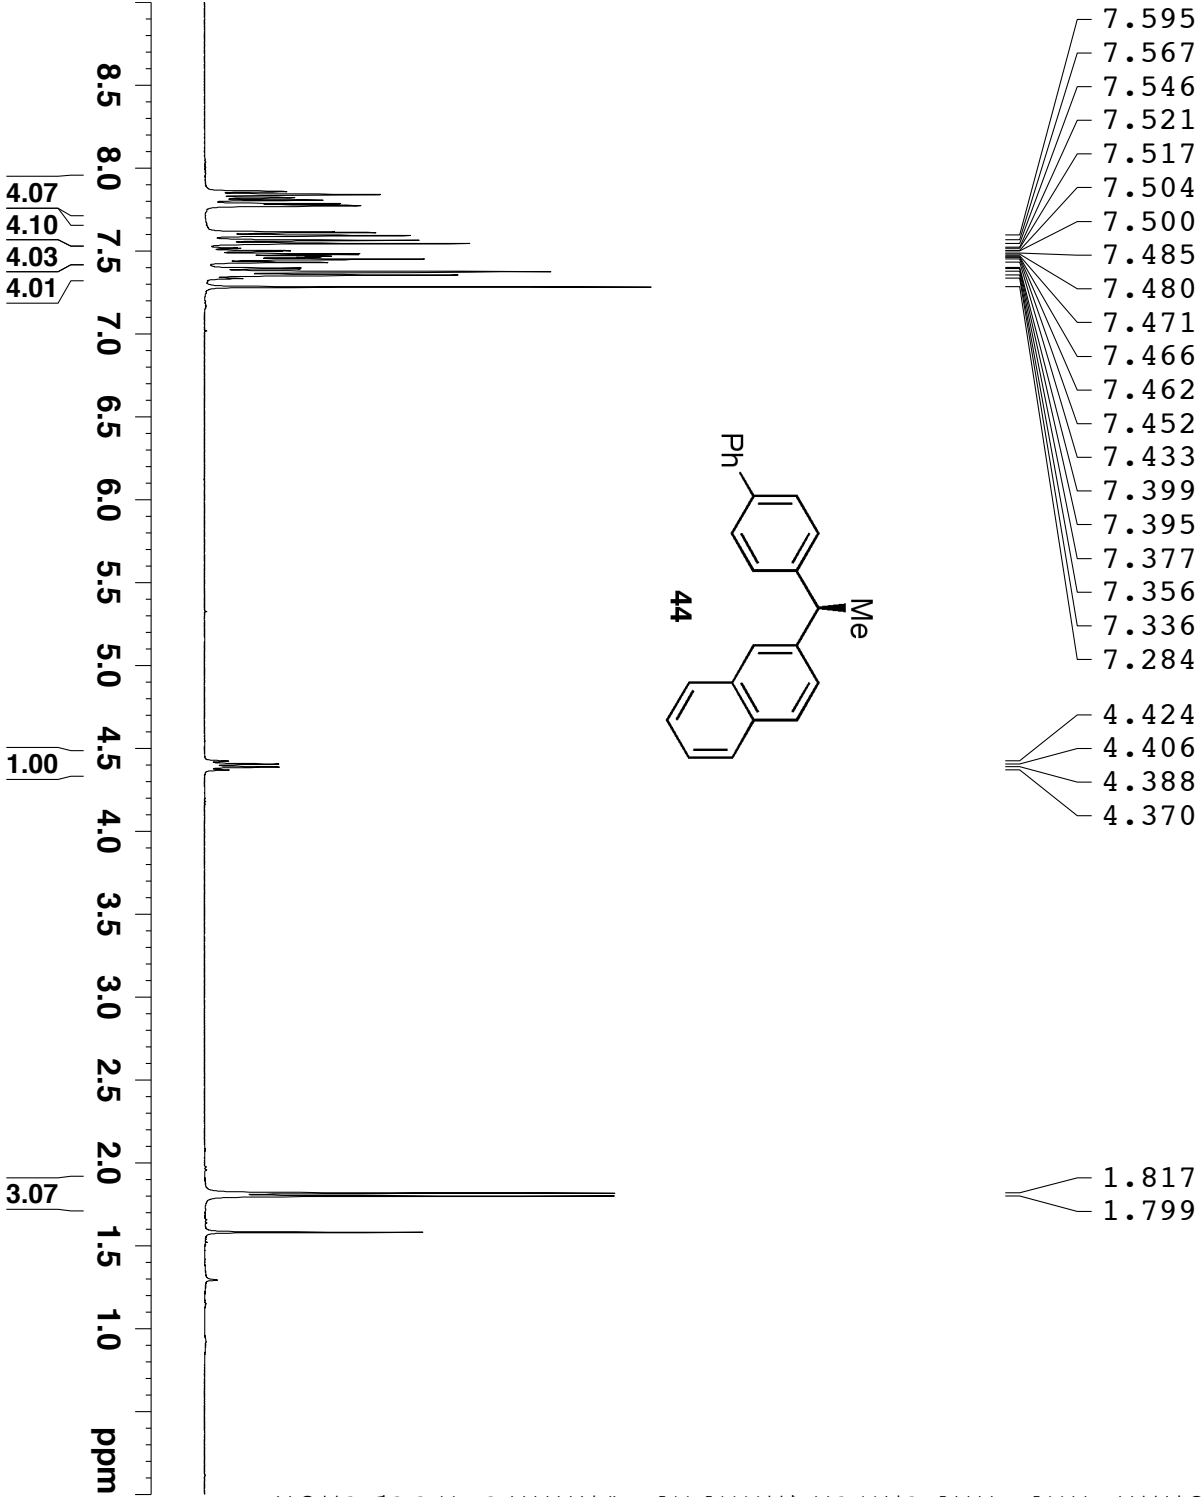

Current Data Parameters  
 NAME PM-4-39-2-Rerun  
 EXPNO 1  
 PROCNO 1

F2 - Acquisition Parameters  
 Date\_ 20120730  
 Time\_ 9.07  
 INSTRUM spect  
 PROBHD 5 mm CPQNP 1H/  
 PULPROG zg30  
 TD 65536  
 SOLVENT CDCl3  
 NS 16  
 DS 2  
 SWH 8278.146 Hz  
 FIDRES 0.126314 Hz  
 AQ 3.9584243 sec  
 RG 6.3  
 DW 60.400 usec  
 DE 6.00 usec  
 TE 298.1 K  
 D1 1.00000000 sec  
 TD0 1

==== CHANNEL f1 =====  
 NUC1 1H  
 P1 15.00 usec  
 PL1 4.90 dB  
 PL1W 3.30822015 W  
 SFO1 400.1324710 MHz

F2 - Processing parameters  
 SI 32768  
 SF 400.1300000 MHz  
 WDW EM  
 SSB 0  
 LB 0.30 Hz  
 GB 0  
 PC 1.00

Compound **44**, <sup>13</sup>C NMR



- 145.38
- 143.67
- 140.98
- 139.04
- 133.55
- 132.14
- 128.74
- 128.18
- 128.06
- 127.76
- 127.62
- 127.17
- 127.10
- 127.05
- 126.86
- 126.02
- 125.45
- 125.40

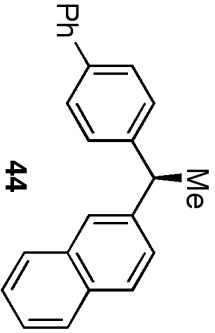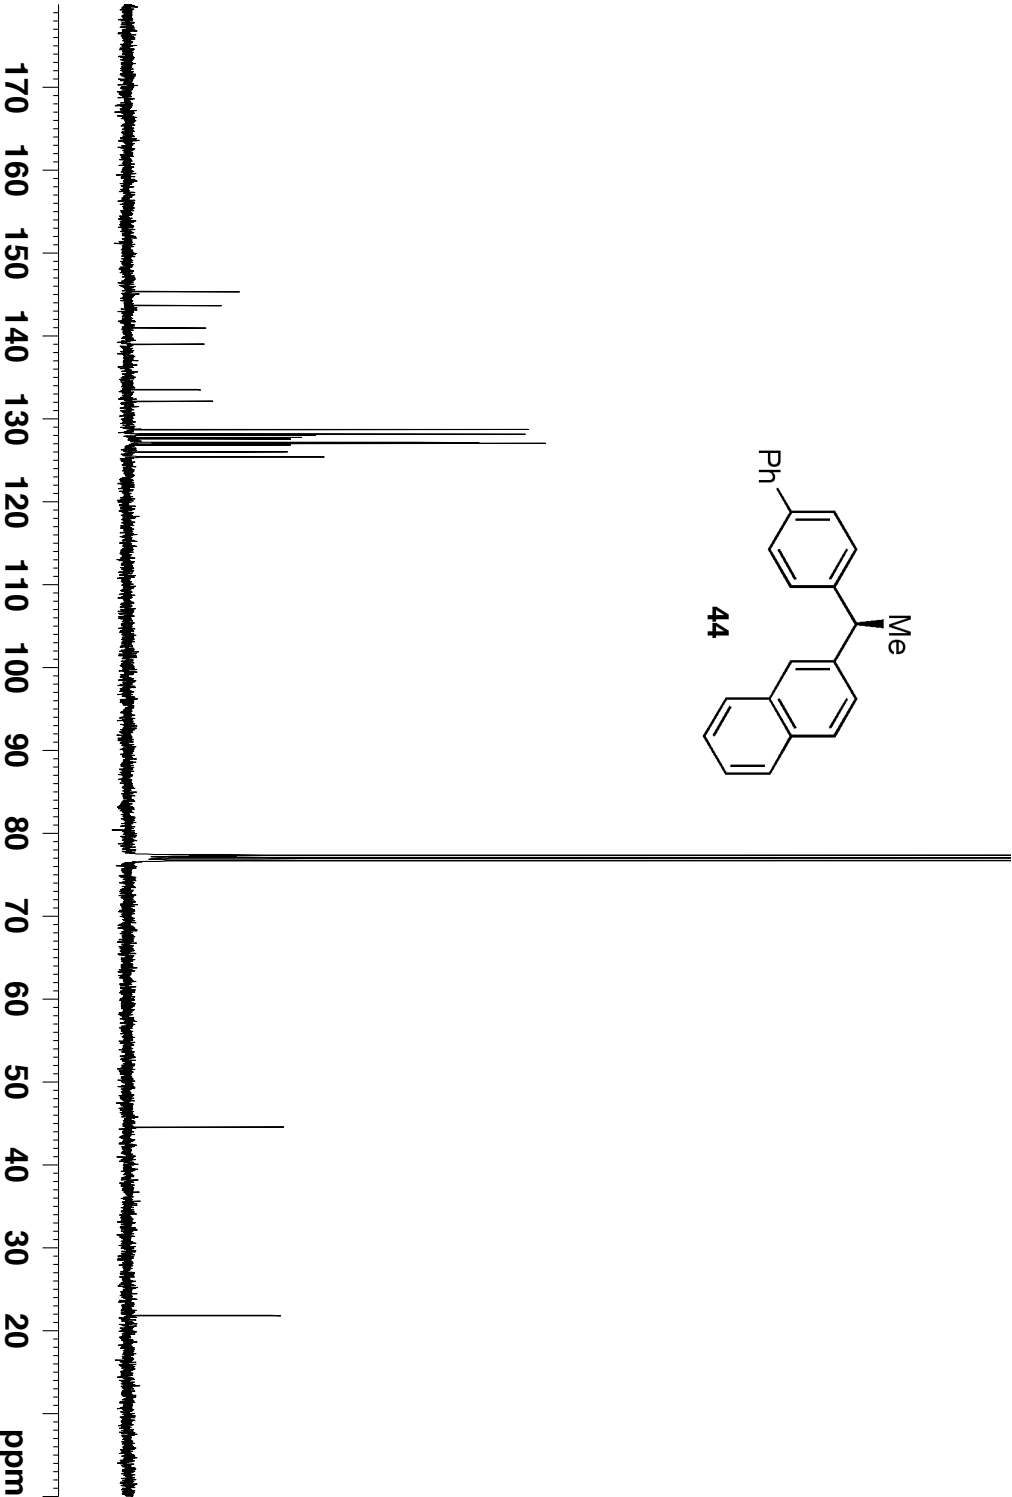

- 44.56
- 21.81

Current Data Parameters  
 NAME PY-4-39-2-Rerun  
 EXPNO 2  
 PROCNO 1

F2 - Acquisition Parameters  
 Date\_ 20120730  
 Time\_ 9.10

INSTRUM spect  
 PROBHD 5 mm CPQNP 1H/  
 PULPROG zgpg30  
 TD 65536  
 SOLVENT CDCl3  
 NS 32  
 DS 4

SWH 23980.814 Hz  
 FIDRES 0.365918 Hz  
 AQ 1.3664756 sec  
 RG 512  
 DW 20.850 usec  
 DE 18.00 usec  
 TE 298.2 K  
 D1 2.00000000 sec  
 D11 0.03000000 sec  
 TD0 1

==== CHANNEL f1 =====  
 NUC1 <sup>13</sup>C  
 P1 9.25 usec  
 PL1 0.55 dB  
 PL1W 35.18820572 W  
 SFO1 100.6228298 MHz

==== CHANNEL f2 =====  
 CPDPRG2 waltz16  
 NUC2 <sup>1</sup>H  
 PCPD2 90.00 usec  
 PL2 4.90 dB  
 PL12 20.46 dB  
 PL13 21.00 dB  
 PL2W 3.30822015 W  
 PL12W 0.09195905 W  
 PL13W 0.08120718 W  
 SFO2 400.1316005 MHz

F2 - Processing parameters  
 SI 32768  
 SF 100.6127690 MHz  
 WDM EM  
 SSB 0  
 LB 1.00 Hz  
 GB 0  
 PC 1.40

Compound (R)-38, 1H NMR



S121

Current Data Parameters  
 NAME PM-4-40-3  
 EXPNO 1  
 PROCNO 1

F2 - Acquisition Parameters

Date\_ 20120730  
 Time\_ 19.12  
 INSTRUM spect  
 PROBHD 5 mm CPQNP 1H/  
 PULPROG zg30  
 TD 65536  
 SOLVENT CDCl3  
 NS 16  
 DS 2  
 SWH 8278.146 Hz  
 FIDRES 0.126314 Hz  
 AQ 3.9584243 sec  
 RG 4  
 DW 60.400 usec  
 DE 6.00 usec  
 TE 298.2 K  
 D1 1.00000000 sec  
 TD0 1

==== CHANNEL f1 =====  
 NUC1 1H  
 P1 15.00 usec  
 PL1 4.90 dB  
 PL1W 3.30822015 W  
 SFO1 400.1324710 MHz

F2 - Processing parameters

SI 32768  
 SF 400.1300000 MHz  
 WDW EM  
 SSB 0  
 LB 0.30 Hz  
 GB 0  
 PC 1.00

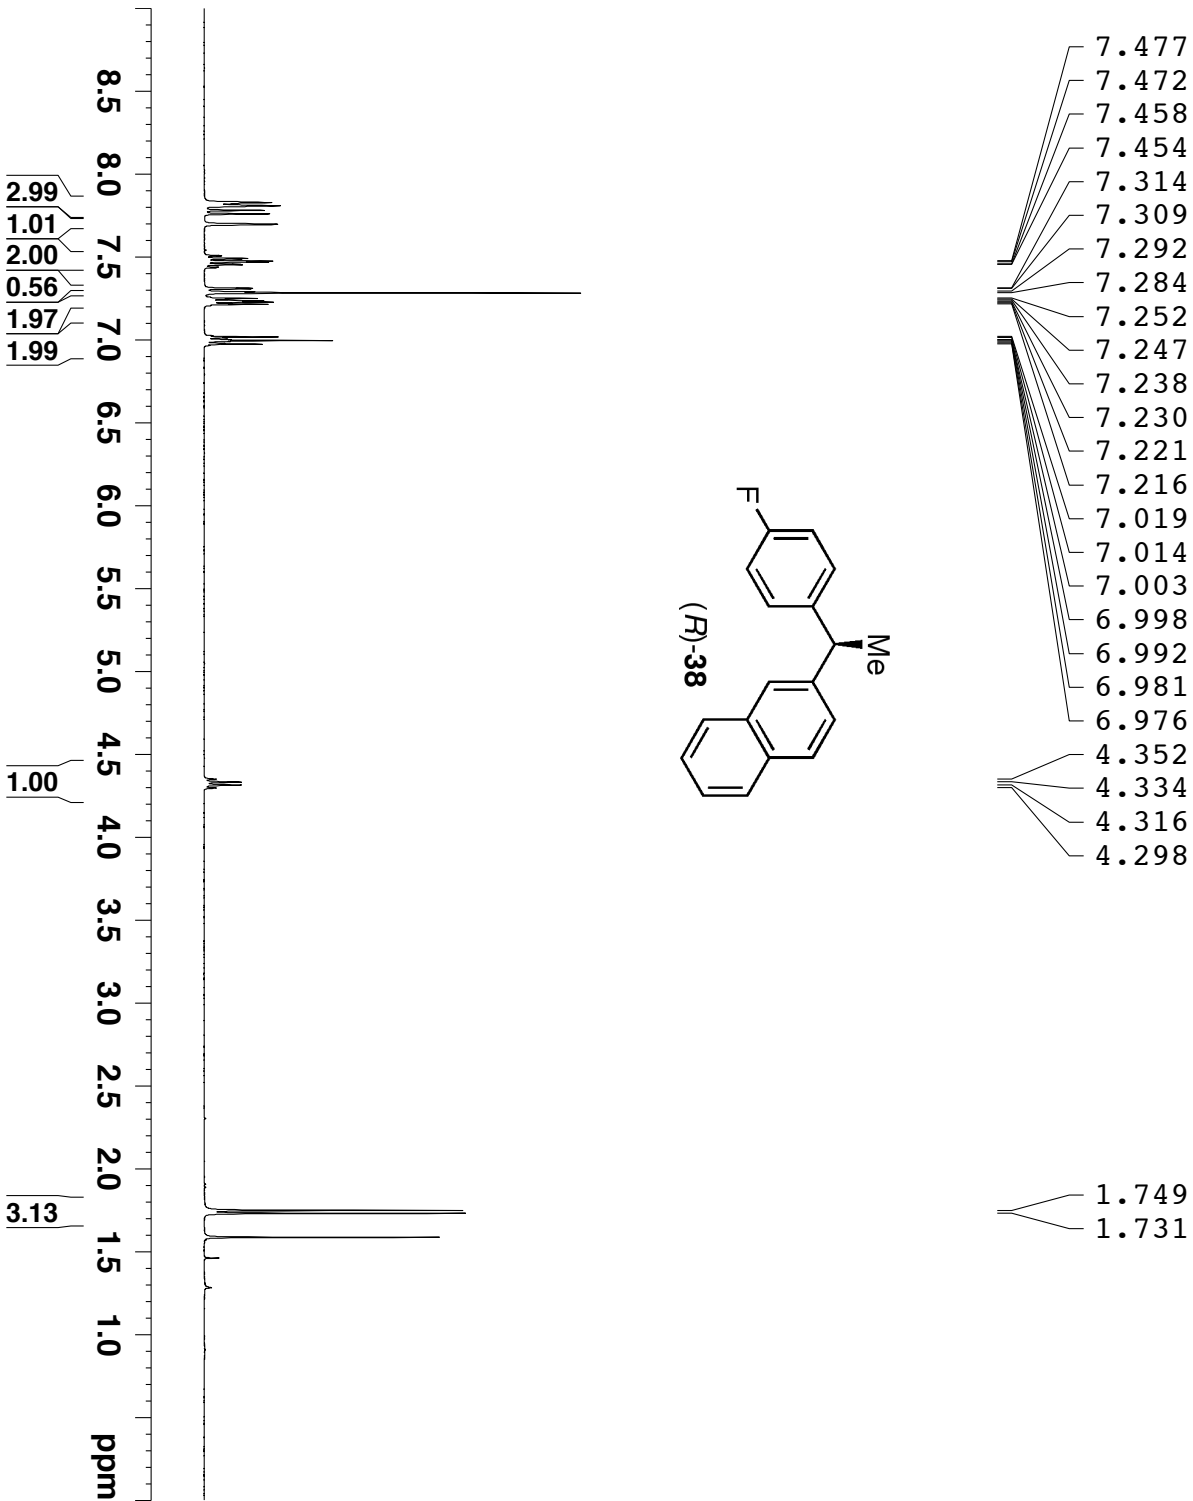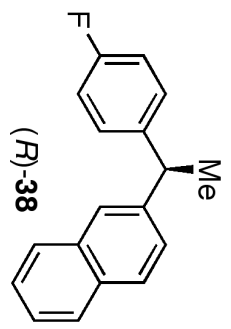

Compound (R)-38, <sup>13</sup>C NMR



- 162.52
- 160.09
- 143.56
- 141.92
- 141.89
- 133.49
- 132.11
- 129.18
- 129.10
- 128.07
- 127.72
- 127.60
- 126.68
- 126.06
- 125.50
- 125.29
- 115.24
- 115.03

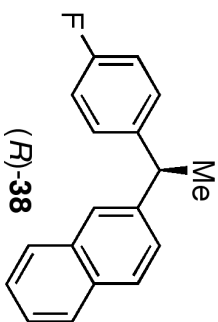

- 44.11
- 21.94

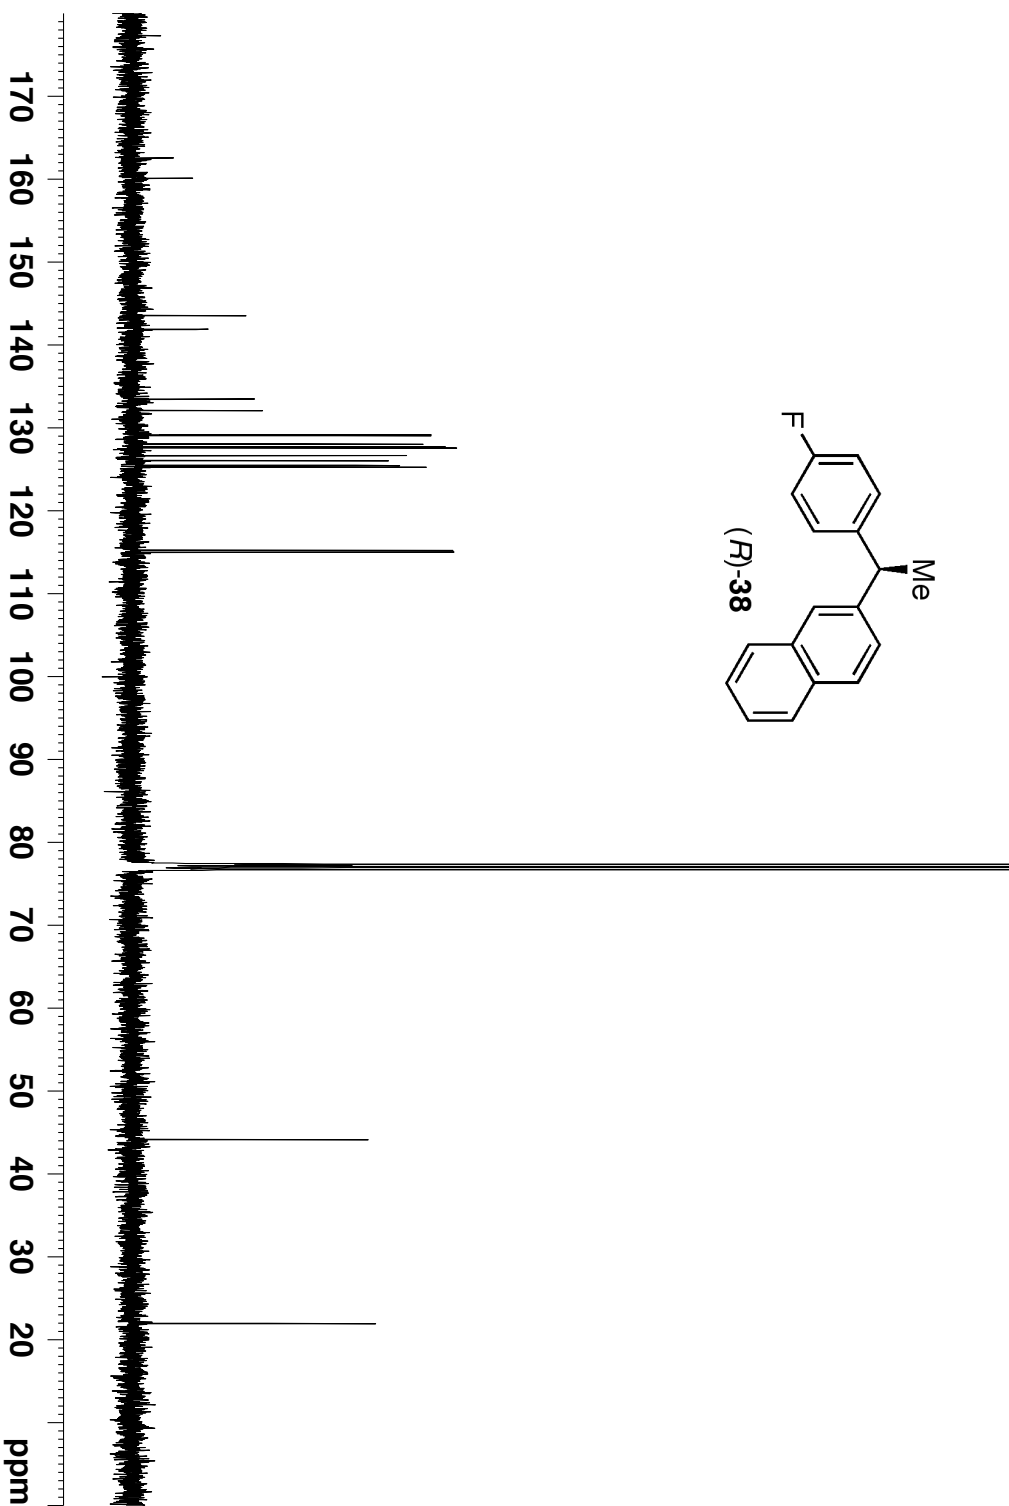

Current Data Parameters  
 NAME PM-4-40-3  
 EXPNO 2  
 PROCNO 1

F2 - Acquisition Parameters  
 Date\_ 20120730  
 time\_ 15.16

INSTRUM spect  
 PROBHD 5 mm CPQNP 1H/  
 PULPROG zgpg30  
 TD 65536  
 SOLVENT CDCl3

NS 32  
 DS 4  
 SWH 23980.814 Hz  
 FIDRES 0.365918 Hz  
 AQ 1.3664756 sec

RG 512  
 DW 20.850 usec  
 DE 18.00 usec  
 TE 298.1 K  
 D1 2.00000000 sec  
 D11 0.03000000 sec  
 TD0 1

==== CHANNEL f1 =====  
 NUC1 <sup>13</sup>C  
 P1 9.25 usec  
 PL1 0.55 dB  
 PL1W 35.18820572 W  
 SFO1 100.6228298 MHz

==== CHANNEL f2 =====  
 CPDPRG2 waltz16  
 NUC2 <sup>1</sup>H  
 PCPD2 90.00 usec  
 PL2 4.90 dB  
 PL12 20.46 dB  
 PL13 21.00 dB  
 PL12W 3.30822015 W  
 PL12W 0.09195905 W  
 PL13W 0.08120718 W  
 SFO2 400.1316005 MHz

F2 - Processing parameters  
 SI 32768  
 SF 100.6127690 MHz  
 WDW EM  
 SSB 0  
 LB 1.00 Hz  
 GB 0  
 PC 1.40

Compound 45, <sup>1</sup>H NMR



S123

- 7.348
- 7.330
- 7.310
- 7.285
- 7.267
- 7.256
- 7.237
- 7.219
- 6.929
- 6.910
- 6.870
- 6.818
- 6.812
- 6.798
- 6.792
- 6.491
- 6.451
- 6.440
- 6.426
- 6.401
- 6.386
- 3.845
- 3.693
- 3.676
- 3.660
- 3.644
- 3.627
- 1.512
- 1.495

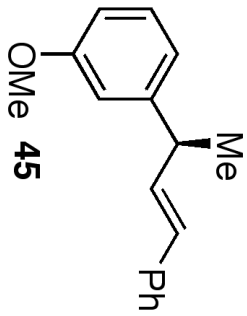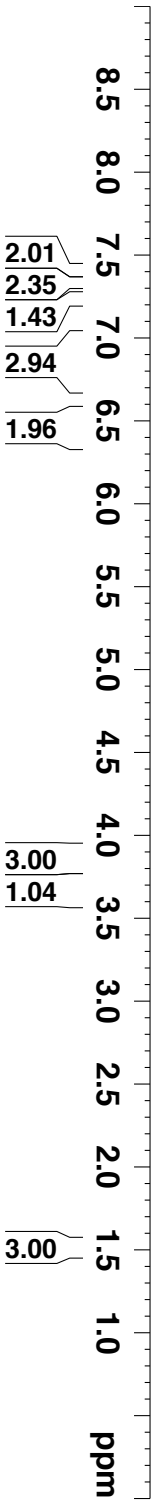

Current Data Parameters  
 NAME PM-4-41-1  
 EXPNO 1  
 PROCNO 1

F2 - Acquisition Parameters  
 Date\_ 20120801  
 Time\_ 10.19  
 INSTRUM spect  
 PROBHD 5 mm CPQNP 1H/  
 PULPROG zg30  
 TD 65536  
 SOLVENT CDCl3  
 NS 16  
 DS 2  
 SWH 8278.146 Hz  
 FIDRES 0.126314 Hz  
 AO 3.9584243 sec  
 RG 7.1  
 DW 60.400 usec  
 DE 6.00 usec  
 TE 298.2 K  
 D1 1.00000000 sec  
 TD0 1

==== CHANNEL f1 =====  
 NUC1 1H  
 P1 15.00 usec  
 PL1 4.90 dB  
 PL1W 3.30822015 W  
 SFO1 400.1324710 MHz

F2 - Processing parameters  
 SI 32768  
 SF 400.1300000 MHz  
 WDW EM  
 SSB 0  
 LB 0.30 Hz  
 GB 0  
 PC 1.00

Compound **45**, <sup>13</sup>C NMR



159.74  
147.39  
137.56  
135.04  
129.49  
128.58  
128.52  
127.10  
126.19  
119.76  
113.31  
111.27

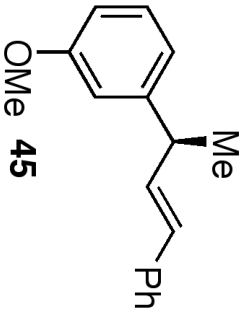

55.22  
42.64  
21.21

170 160 150 140 130 120 110 100 90 80 70 60 50 40 30 20 ppm

Current Data Parameters  
NAME PM-4-41-1  
EXPNO 2  
PROCNO 1

F2 - Acquisition Parameters

Date\_ 20120801  
Time\_ 10.22  
INSTRUM spect  
PROBHD 5 mm CPQNP 1H/  
PULPROG zgpg30  
TD 65536  
SOLVENT CDCl3  
NS 32  
DS 4  
SWH 23980.814 Hz  
FIDRES 0.365918 Hz  
AQ 1.3664756 sec  
RG 512  
DW 20.850 usec  
DE 18.00 usec  
TE 298.2 K  
D1 2.00000000 sec  
D11 0.03000000 sec  
TD0 1

==== CHANNEL f1 =====  
NUC1 13C  
P1 9.25 usec  
PL1 0.55 dB  
PL1W 35.18820572 W  
SFO1 100.6228298 MHz

==== CHANNEL f2 =====  
CPDPRG2 waltz16  
NUC2 1H  
PCPD2 90.00 usec  
PL2 4.90 dB  
PL12 20.46 dB  
PL13 21.00 dB  
PL12W 3.30822015 W  
PL12W 0.09195905 W  
PL13W 0.08120718 W  
SFO2 400.1316005 MHz

F2 - Processing parameters  
SI 32768  
SF 100.6127690 MHz  
WDW EM  
SSB 0  
LB 1.00 Hz  
GB 0  
PC 1.40



Compound 46, <sup>1</sup>H NMR



S125

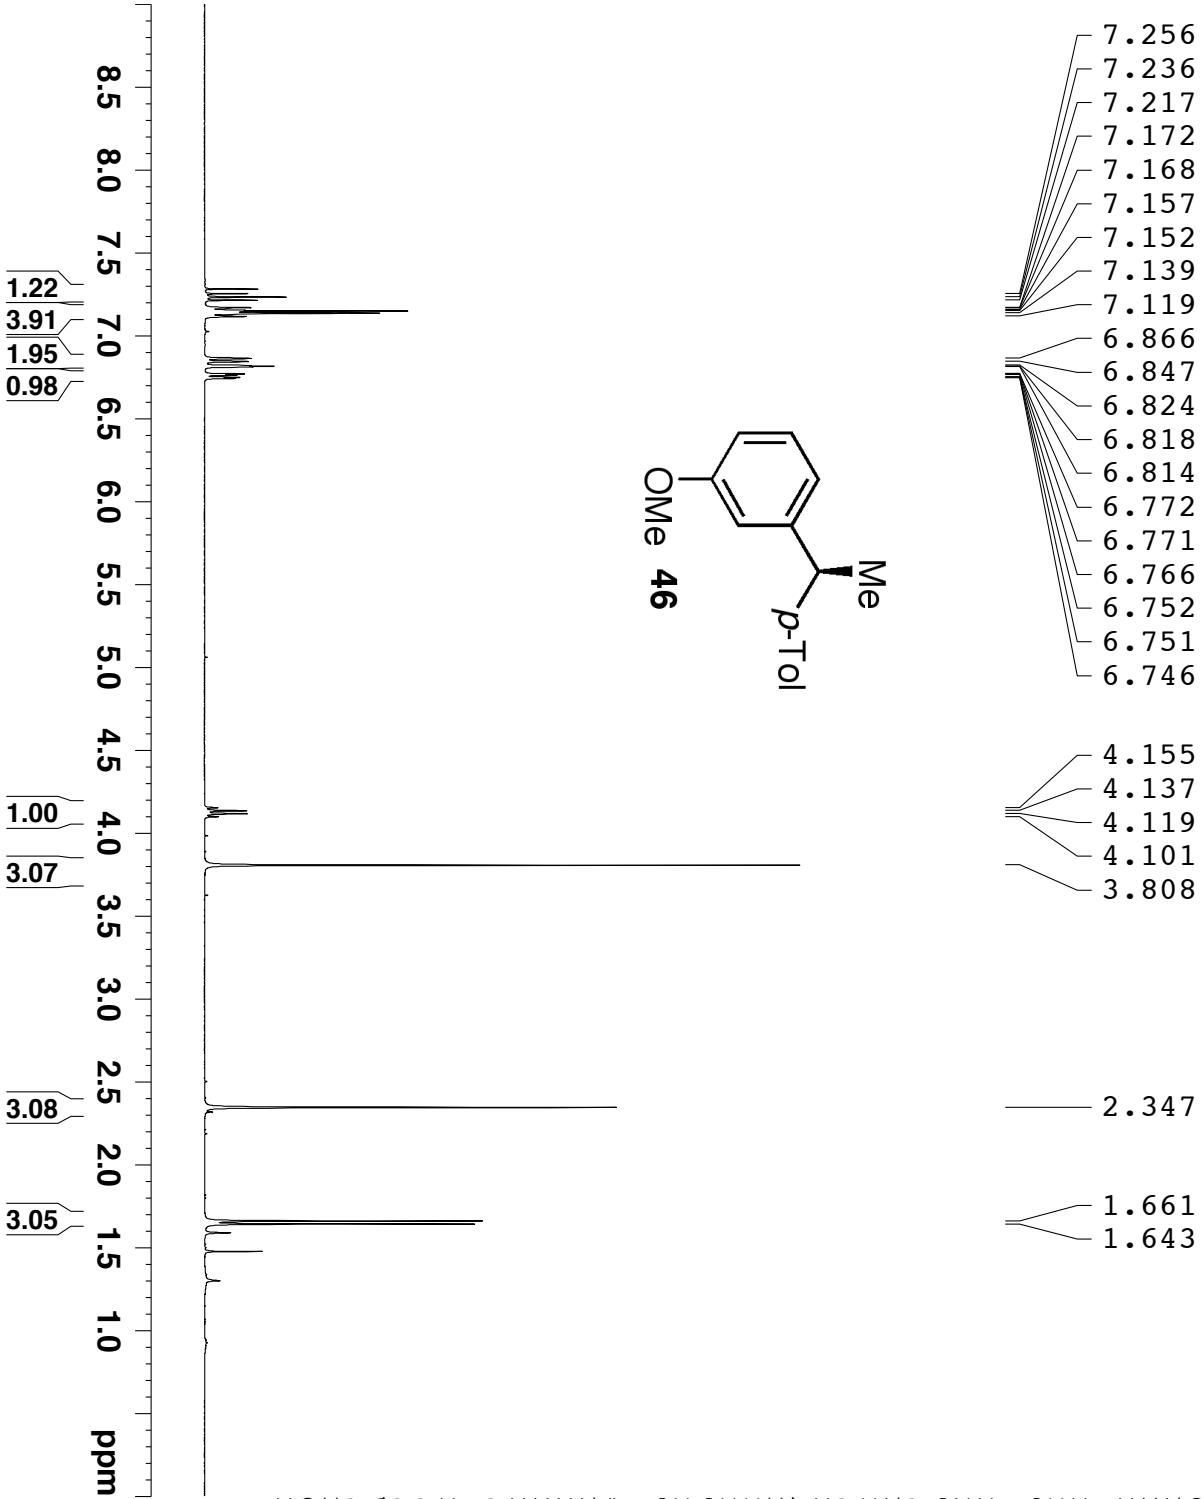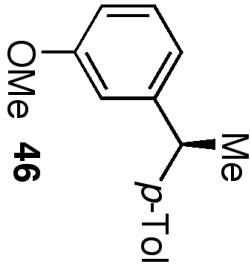

Current Data Parameters  
 NAME DM3-117-1  
 EXPNO 1  
 PROCNO 1

F2 - Acquisition Parameters  
 Date\_ 20120721  
 Time\_ 15.11  
 INSTRUM spect  
 PROBHD 5 mm CPQNP 1H/  
 PULPROG zg30  
 TD 65536  
 SOLVENT CDCl3  
 NS 16  
 DS 2  
 SWH 8278.146 Hz  
 FIDRES 0.126314 Hz  
 AQ 3.9584243 sec  
 RG 10.1  
 DW 60.400 usec  
 DE 6.00 usec  
 TE 298.2 K  
 D1 1.00000000 sec  
 TD0 1

==== CHANNEL f1 =====  
 NUC1 1H  
 P1 15.00 usec  
 PL1 4.90 dB  
 PL1W 3.30822015 W  
 SFO1 400.1324710 MHz

F2 - Processing parameters  
 SI 32768  
 SF 400.1300000 MHz  
 WDW EM  
 SSB 0  
 LB 0.30 Hz  
 GB 0  
 PC 1.00

Compound **46**, <sup>13</sup>C NMR

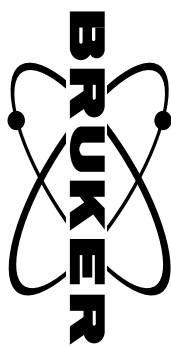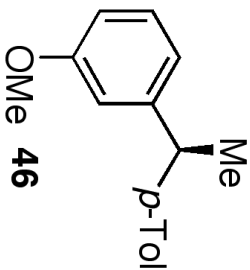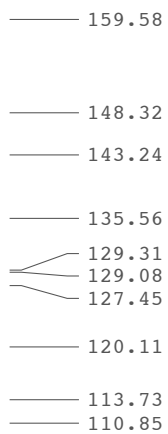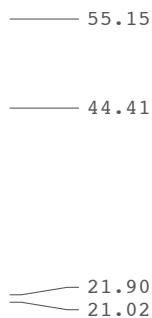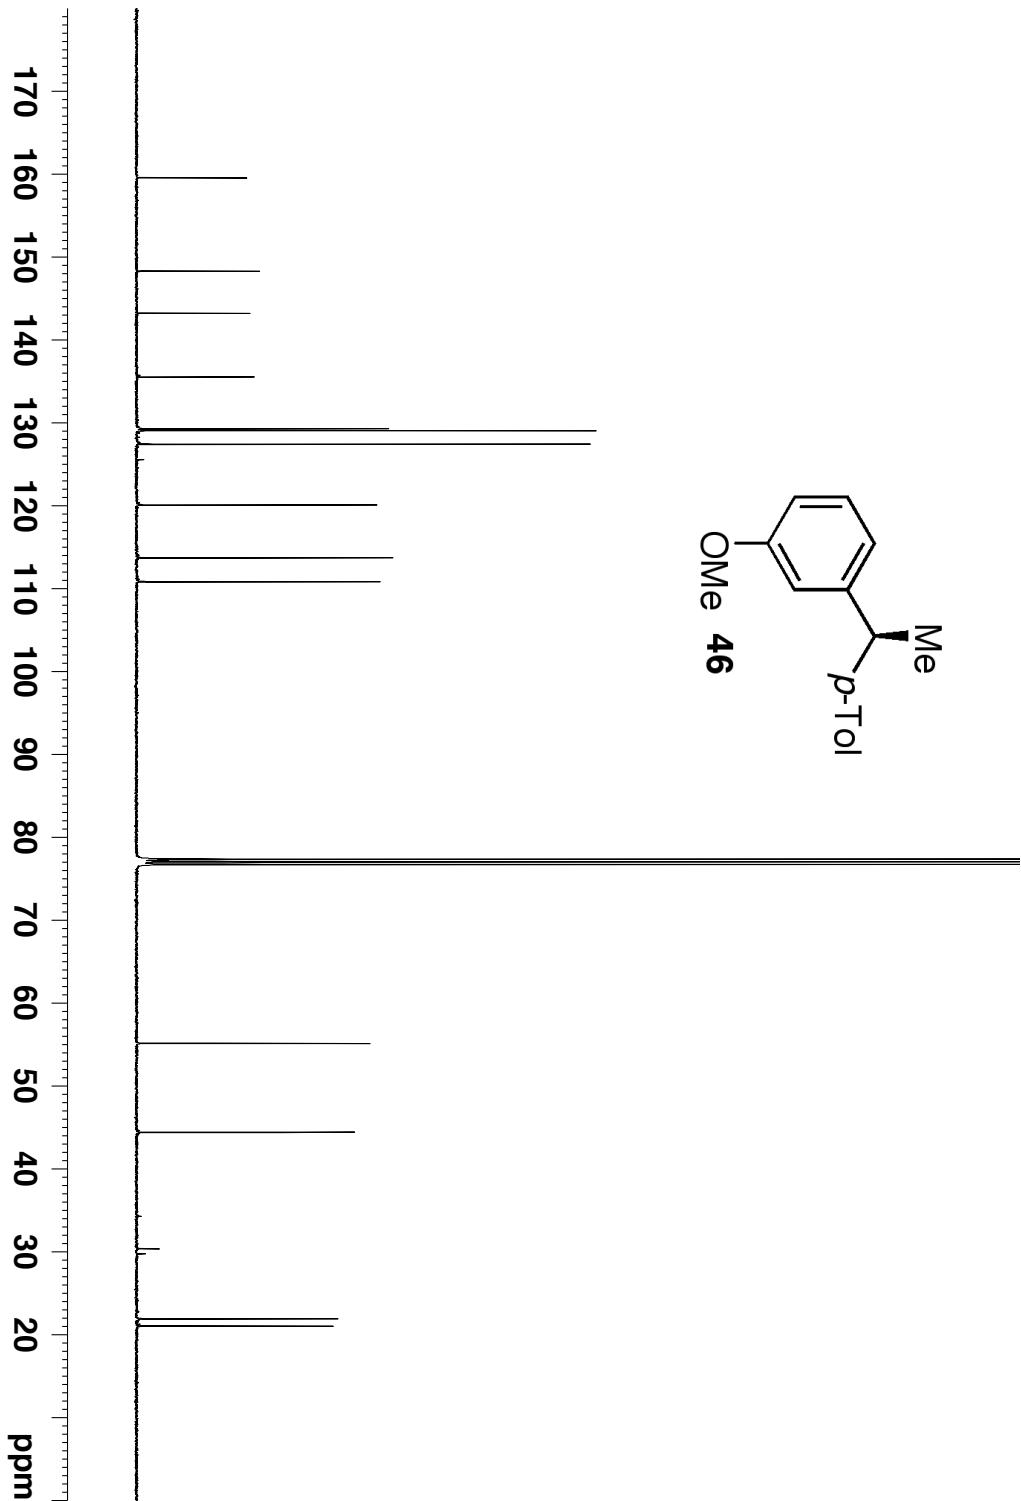

Current Data Parameters  
 NAME DM3-117-1  
 EXPNO 2  
 PROCNO 1

F2 - Acquisition Parameters  
 Date\_ 20120721  
 Time\_ 15.27

INSTRUM spect  
 PROBHD 5 mm CPQNP 1H/  
 PULPROG zgpg30  
 TD 65536  
 SOLVENT CDC13  
 NS 256  
 DS 4

SWH 23980.814 Hz  
 FIDRES 0.365918 Hz  
 AQ 1.3664756 sec  
 RG 512  
 DW 20.850 usec  
 DE 18.00 usec  
 TE 298.1 K  
 D1 2.00000000 sec  
 D11 0.03000000 sec  
 TD0 1

==== CHANNEL f1 =====  
 NUC1 13C  
 P1 9.25 usec  
 PL1 0.55 dB  
 PL1W 35.18820572 W  
 SFO1 100.6228298 MHz

==== CHANNEL f2 =====  
 CPDPRG2 waltz16  
 NUC2 1H  
 PCPD2 90.00 usec  
 PL2 4.90 dB  
 PL12 20.46 dB  
 PL13 21.00 dB  
 PL2W 3.30822015 W  
 PL12W 0.09195905 W  
 PL13W 0.08120718 W  
 SFO2 400.1316005 MHz

F2 - Processing parameters  
 SI 32768  
 SF 100.6127690 MHz  
 WDM EM  
 SSB 0  
 LB 1.00 Hz  
 GB 0  
 PC 1.40

Compound 50, <sup>1</sup>H NMR



Current Data Parameters  
 NAME PM-4-95-1-1S  
 EXPNO 1  
 PROCNO 1

F2 - Acquisition Parameters

Date\_ 20121106  
 Time 15.14  
 INSTRUM spect  
 PROBHD 5 mm PABBO BB-  
 PULPROG zg30  
 TD 65536  
 SOLVENT CDCl3  
 NS 8  
 DS 2  
 SWH 8403.361 Hz  
 FIDRES 0.128225 Hz  
 AQ 3.8994420 sec  
 RG 161  
 DW 59.500 usec  
 DE 9.10 usec  
 TE 298.1 K  
 D1 1.00000000 sec  
 TD0 1

==== CHANNEL f1 =====  
 SF01 600.3233018 MHz  
 NUC1 1H  
 P1 14.80 usec

F2 - Processing parameters

SI 65536  
 SF 600.3200643 MHz  
 WDW EM  
 SSB 0  
 LB 0.30 Hz  
 GB 0  
 PC 1.00

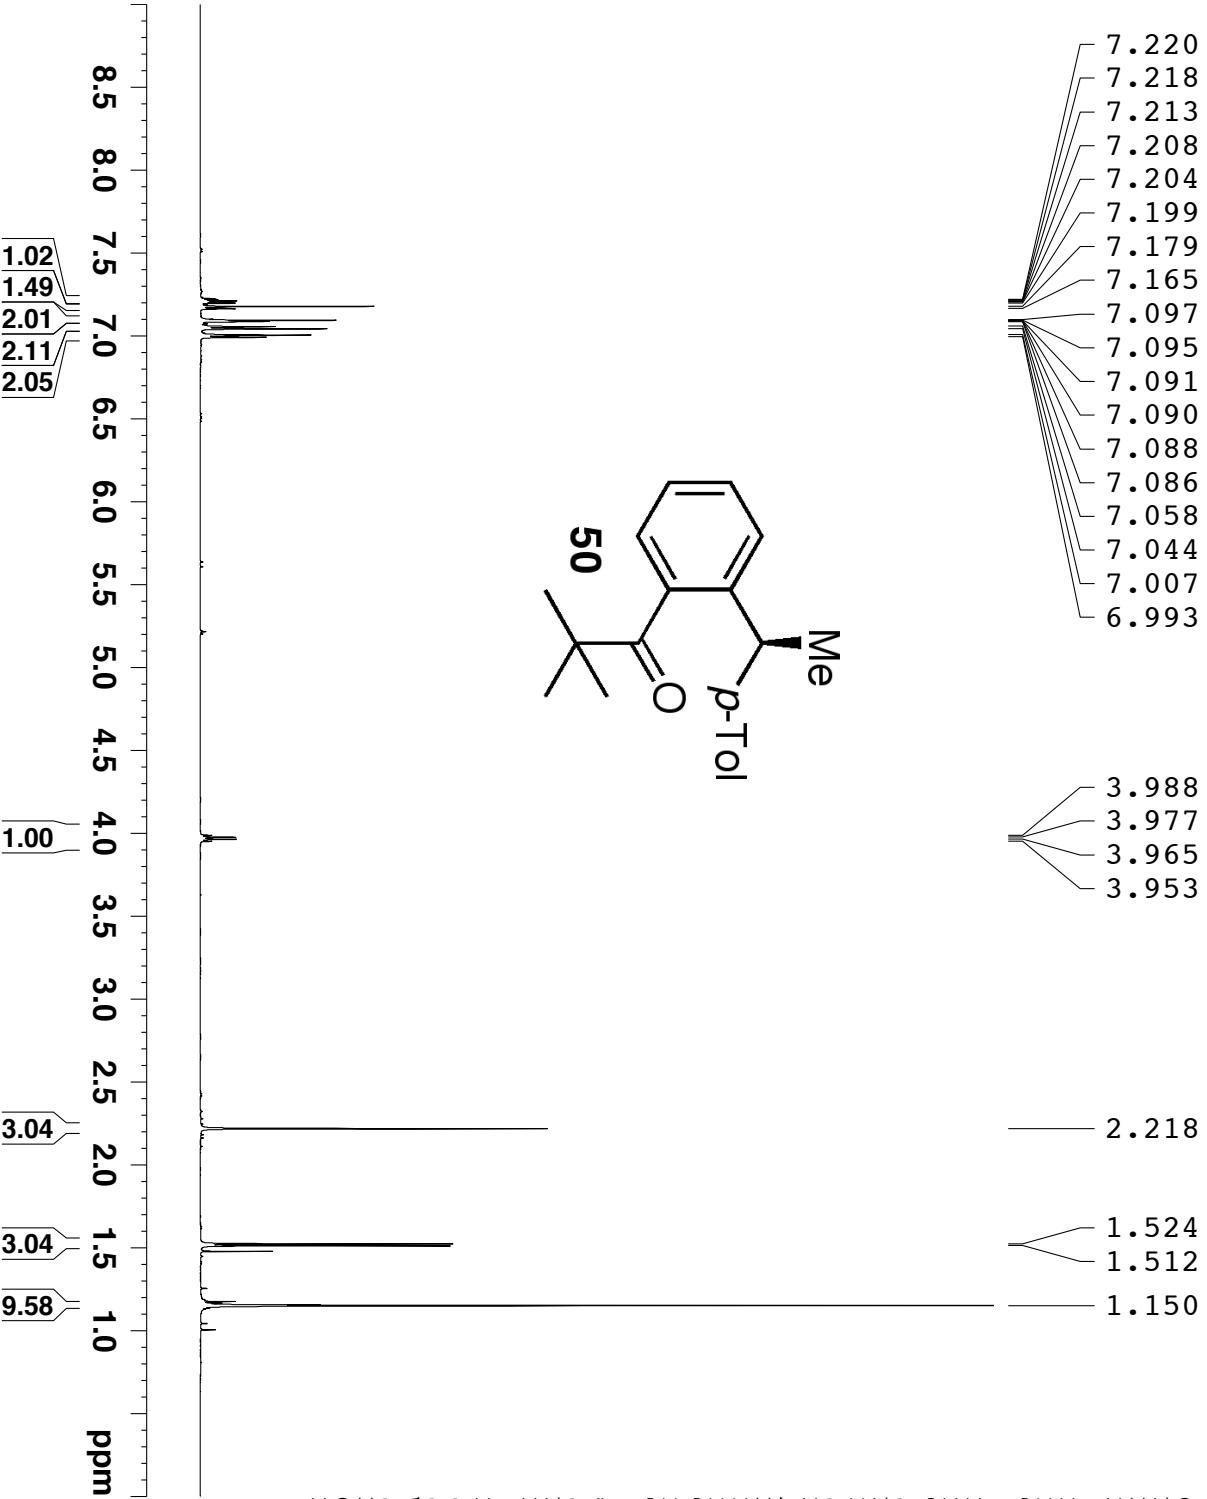

Compound 50, <sup>13</sup>CNMR



S128

Current Data Parameters  
 NAME PM-4-95-1-1S  
 EXPNO 2  
 PROCNO 1

F2 - Acquisition Parameters  
 Date\_ 20121106  
 Time\_ 15.25

INSTRUM spect  
 PROBHD 5 mm PABBO BB-  
 PULPROG zgpg55  
 TD 65536  
 SOLVENT CDCl3  
 NS 256  
 DS 4

SWH 34722.223 Hz  
 FIDRES 0.529819 Hz  
 AO 0.9437684 sec  
 RG 2050  
 DW 14.400 usec  
 DE 8.88 usec  
 TE 298.1 K  
 D1 1.10000002 sec  
 D11 0.03000000 sec  
 TD0 1

==== CHANNEL f1 =====  
 SF01 150.9656784 MHz  
 NUC1 13C  
 P1 9.00 usec

F2 - Processing parameters  
 SI 32768  
 SF 150.9505840 MHz  
 WDW EM  
 SSB 0  
 LB 1.00 Hz  
 GB 0  
 PC 1.40

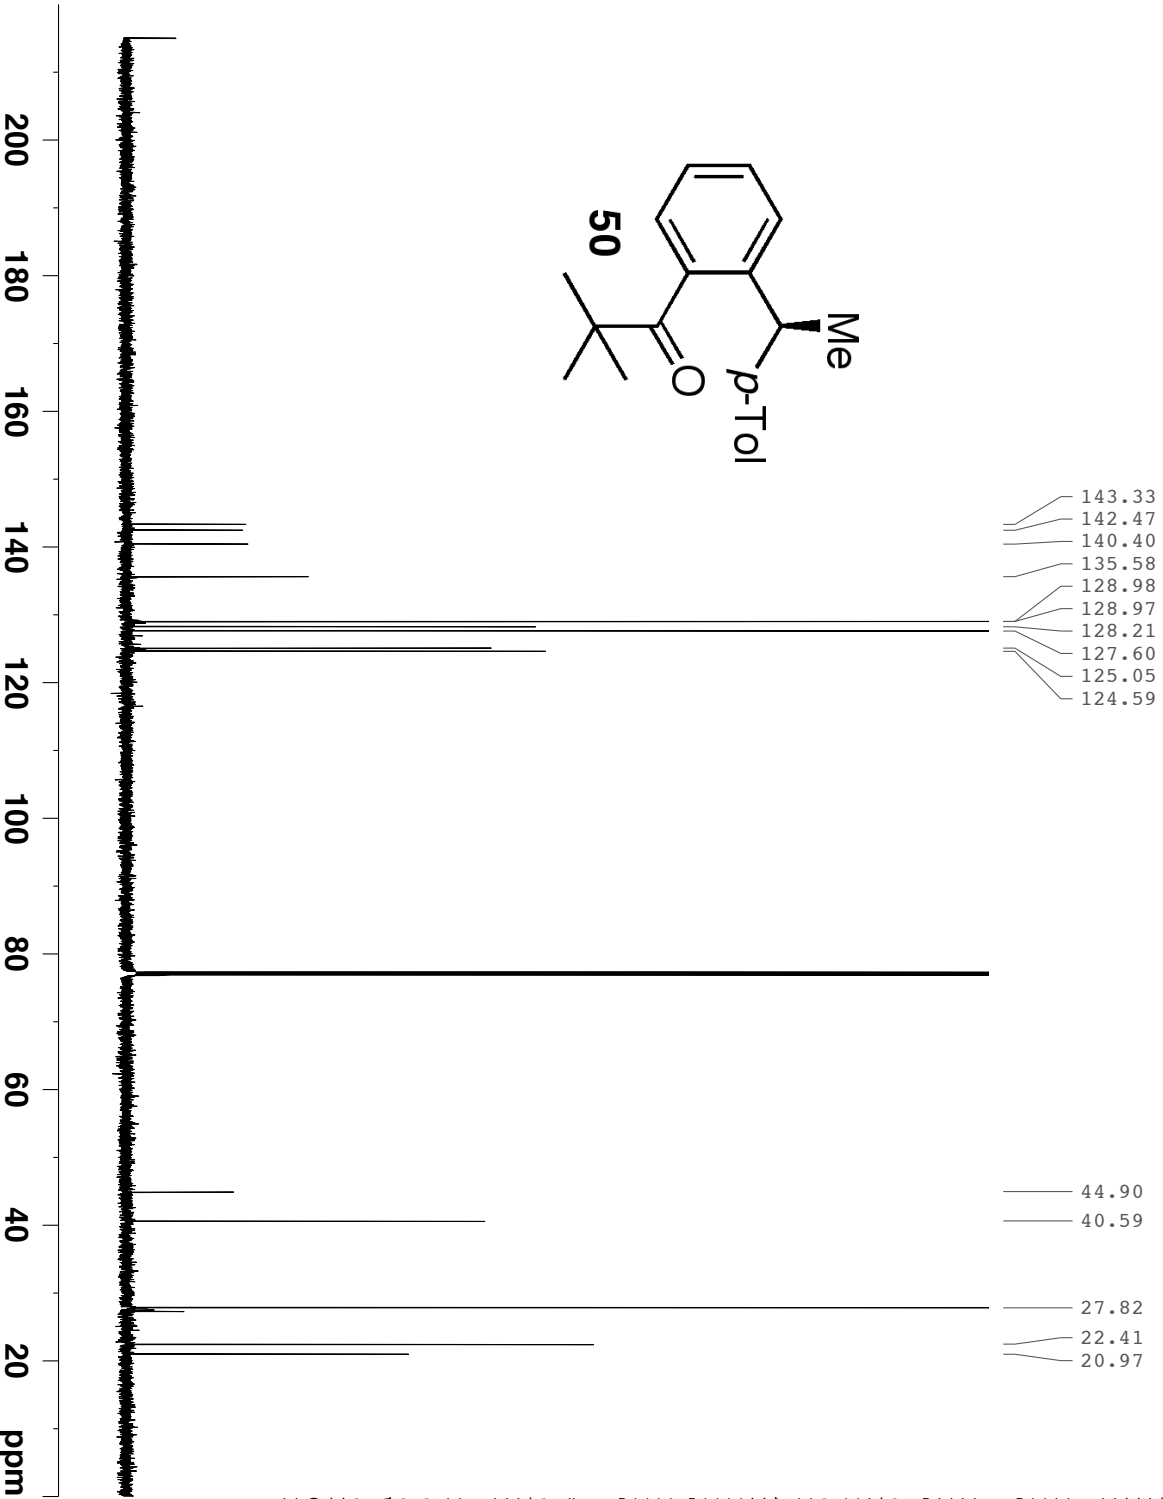

Compound S1 1HNMR

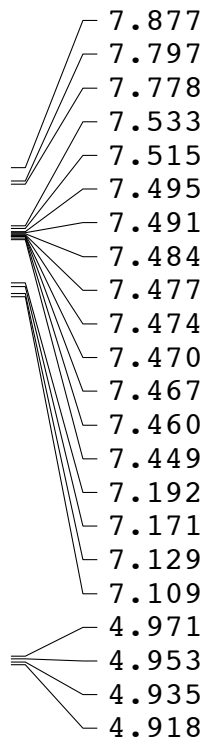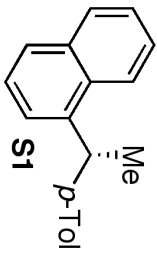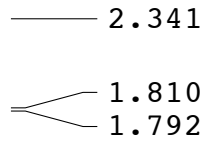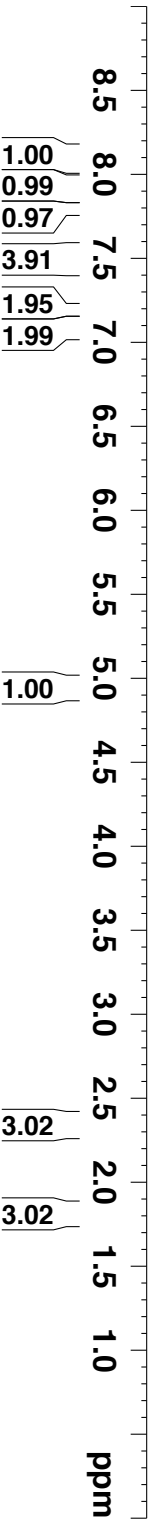

Current Data Parameters  
 NAME DM3-1-NAP  
 EXPNO 1  
 PROCNO 1

F2 - Acquisition Parameters

Date\_ 20120721  
 Time 15.55  
 INSTRUM spect  
 PROBHD 5 mm CPQNP 1H/  
 PULPROG zg30  
 TD 65536  
 SOLVENT CDCl3  
 NS 16  
 DS 2  
 SWH 8278.146 Hz  
 FIDRES 0.126314 Hz  
 AQ 3.9584243 sec  
 RG 12.7  
 DW 60.400 usec  
 DE 6.00 usec  
 TE 298.2 K  
 D1 1.00000000 sec  
 TD0 1

==== CHANNEL f1 =====

NUC1 1H  
 P1 15.00 usec  
 PL1 4.90 dB  
 PL1W 3.30822015 W  
 SF01 400.1324710 MHz

F2 - Processing parameters

SI 32768  
 SF 400.1300000 MHz  
 WDW EM  
 SSB 0  
 LB 0.30 Hz  
 GB 0  
 PC 1.00

Compound S1 13CNMR

- 143.70
- 141.79
- 135.46
- 134.00
- 131.74
- 129.17
- 128.80
- 127.53
- 126.94
- 125.88
- 125.49
- 125.34
- 124.26
- 124.03

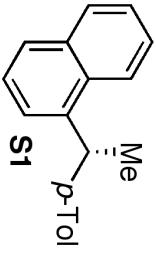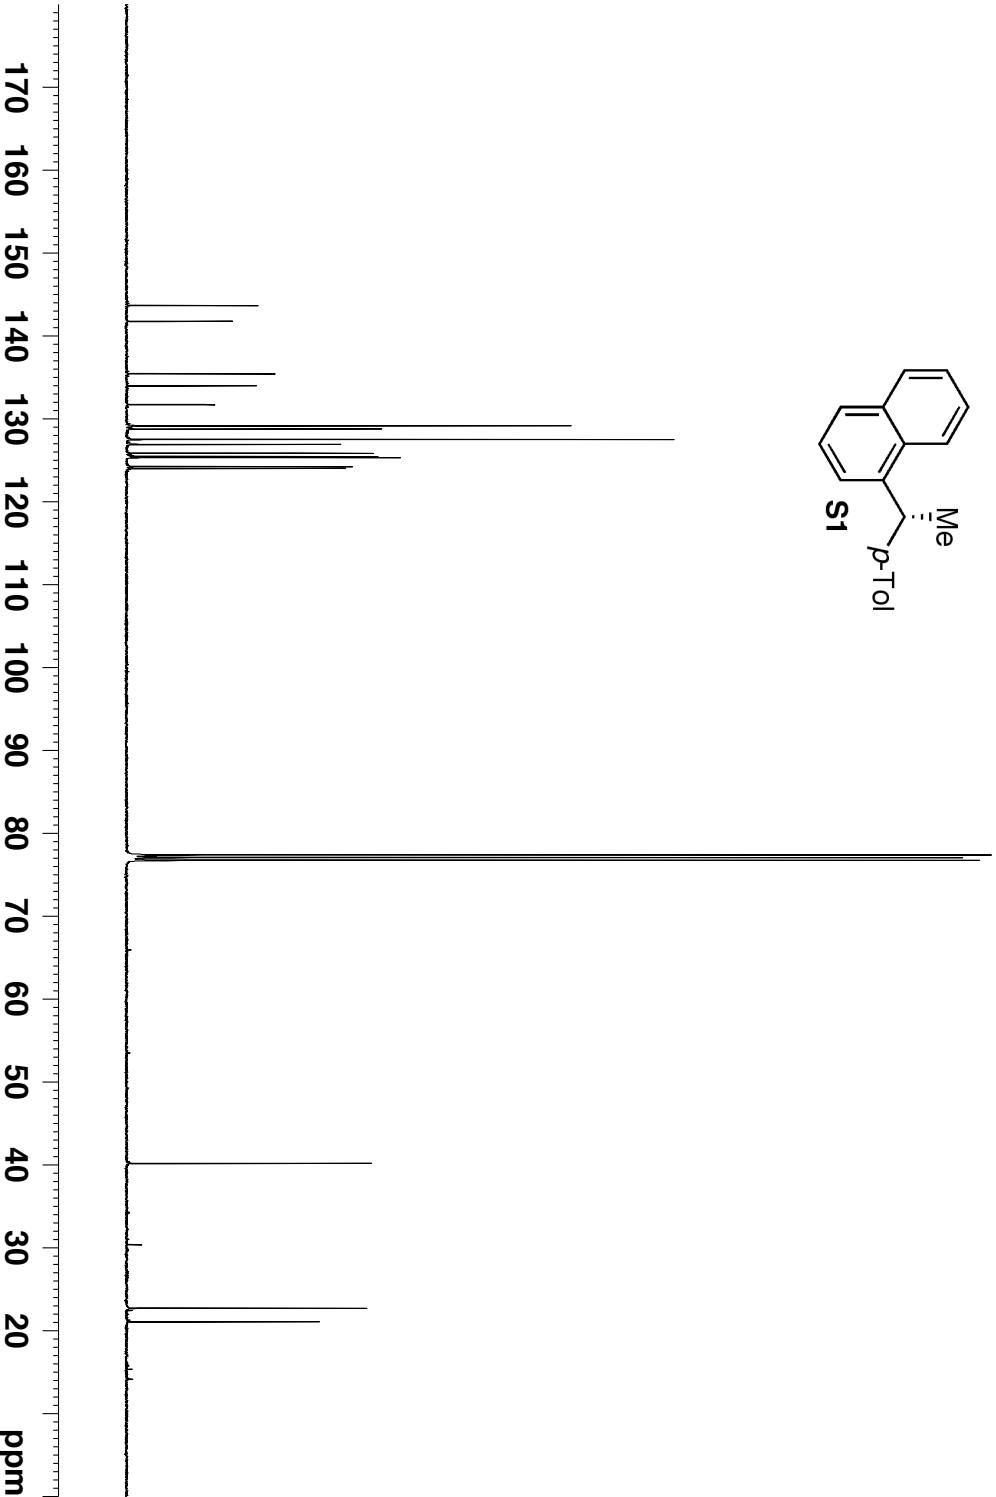

- 40.17
- 22.70
- 21.05



Current Data Parameters  
 NAME DM3-1-NAP  
 EXPNO 2  
 PROCNO 1

F2 - Acquisition Parameters  
 Date\_ 20120721  
 Time\_ 16.11  
 INSTRUM spect  
 PROBD 5 mm CPQNP 1H/  
 PULPROG zgpg30  
 TD 65536  
 SOLVENT CDC13  
 NS 256  
 DS 4  
 SWH 23980.814 Hz  
 FIDRES 0.365918 Hz  
 AQ 1.3664756 sec  
 RG 512  
 DW 20.850 usec  
 DE 18.00 usec  
 TE 298.2 K  
 D1 2.00000000 sec  
 D11 0.03000000 sec  
 TD0 1

==== CHANNEL f1 =====  
 NUC1 13C  
 P1 9.25 usec  
 PL1 0.55 dB  
 PL1W 35.18820572 W  
 SFO1 100.6228298 MHz

==== CHANNEL f2 =====  
 CPDPRG2 waltz16  
 NUC2 1H  
 PCPD2 90.00 usec  
 PL2 4.90 dB  
 PL12 20.46 dB  
 PL13 21.00 dB  
 PL2W 3.30822015 W  
 PL12W 0.09195905 W  
 PL13W 0.08120718 W  
 SFO2 400.1316005 MHz

F2 - Processing parameters  
 SI 32768  
 SF 100.6127690 MHz  
 WDW EM  
 SSB 0  
 LB 1.00 Hz  
 GB 0  
 PC 1.40

Compound 1b, <sup>1</sup>H NMR

7.555  
7.543  
7.534  
7.523  
7.504  
7.491  
7.286

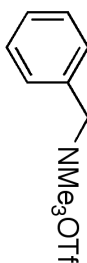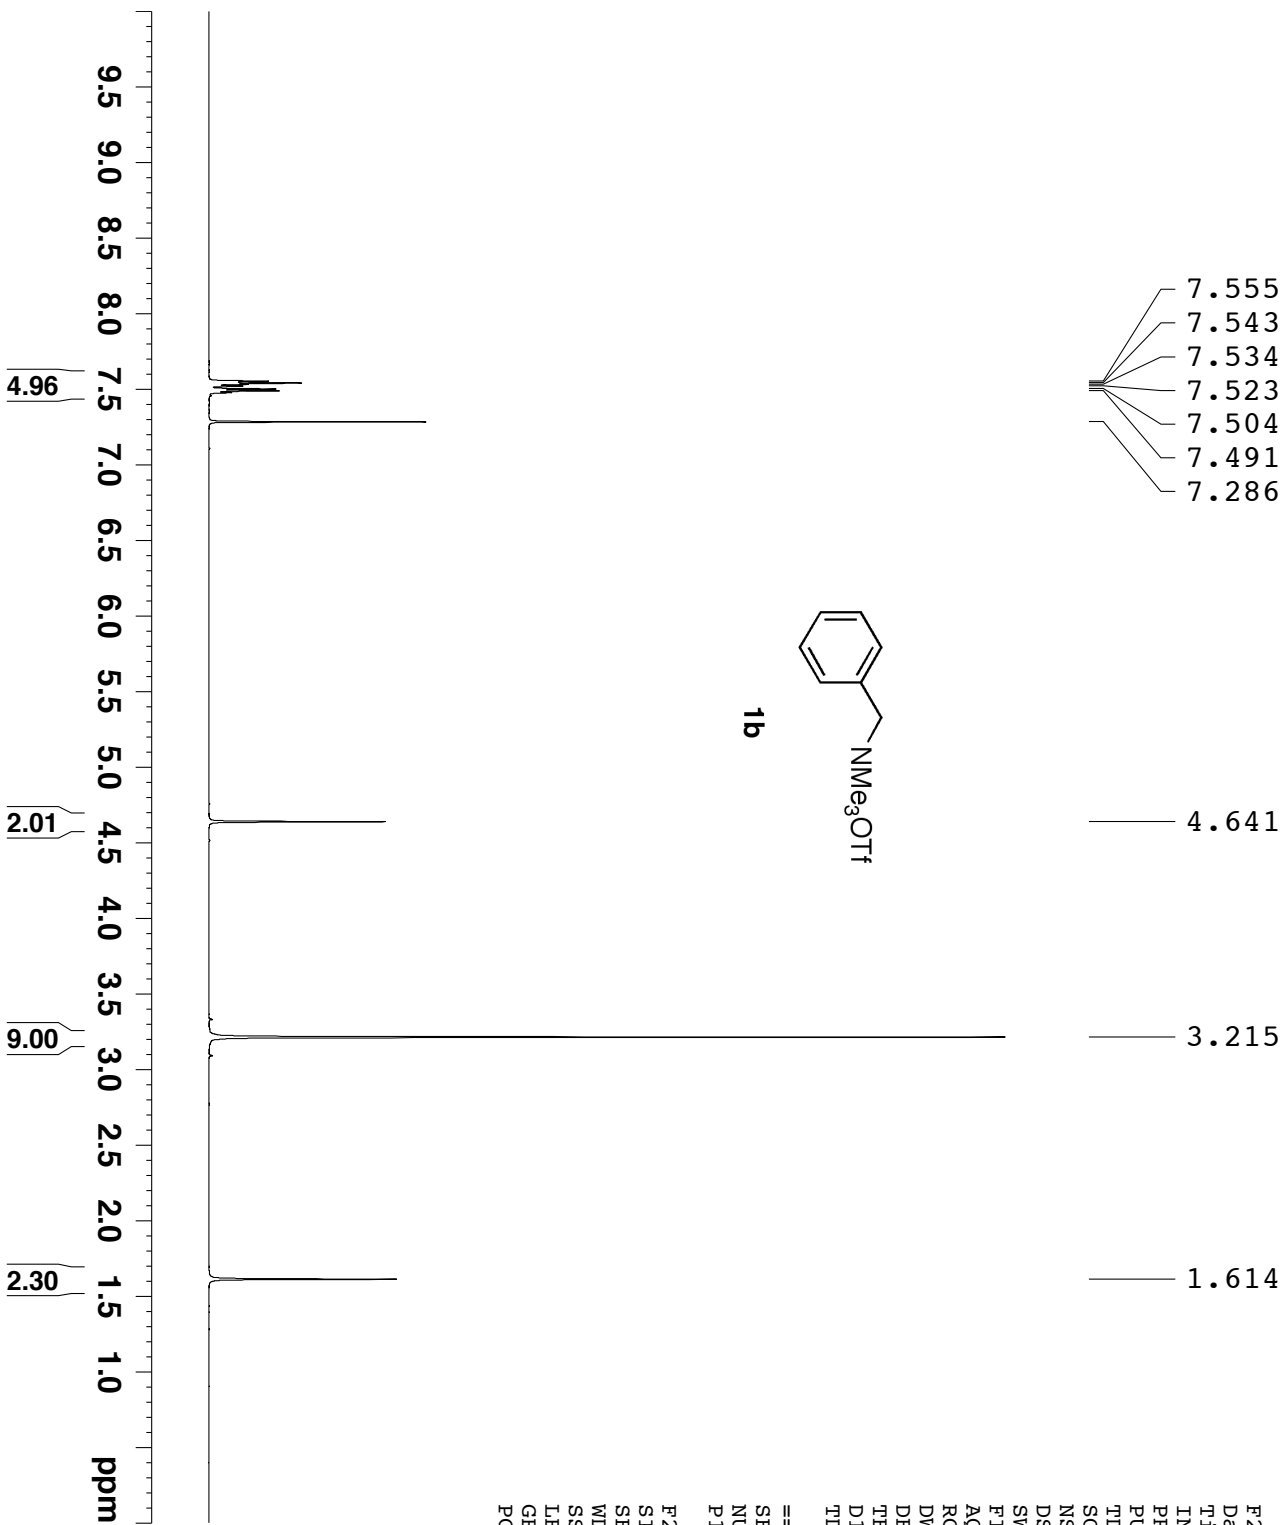

Current Data Parameters  
NAME DM3-CNSI-SALT2  
EXPNO 1  
PROCNO 1

F2 - Acquisition Parameters

Date\_ 20120803  
Time 20.14  
INSTRUM spect  
PROBHD 5 mm PABBO BB/  
PULPROG zg30  
TD 65536  
SOLVENT CDCl3  
NS 8  
DS 2  
SWH 8403.361 Hz  
FIDRES 0.128225 Hz  
AQ 3.8994420 sec  
RG 287  
DW 59.500 usec  
DE 17.39 usec  
TE 300.2 K  
D1 1.00000000 sec  
TD0 1

==== CHANNEL f1 =====

SFO1 600.3233018 MHz  
NUC1 1H  
P1 10.77 usec

F2 - Processing parameters

SI 65536  
SF 600.3200000 MHz  
WDW EM  
SSB 0  
LB 0.30 Hz  
GB 0  
PC 1.00

Compound 1b 13CNMR

132.87  
132.79  
131.01  
130.88  
129.39  
129.23  
127.13  
123.86  
121.74  
119.62  
117.50

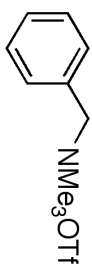

1b

69.57  
52.52  
52.50  
52.47

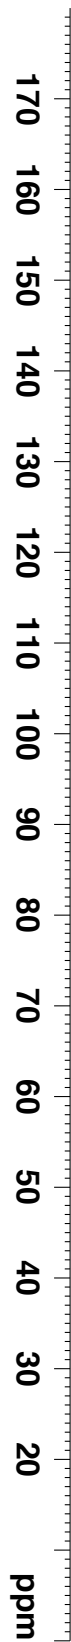

Current Data Parameters  
NAME DM3-CNSI-SALT-1b-C2  
EXPNO 1  
PROCNO 1

F2 - Acquisition Parameters  
Date\_ 20120808  
Time 2.04

INSTRUM spect  
PROBHD 5 mm PABBO BB/  
PULPROG zgpg55  
TD 65536  
SOLVENT CDCl3  
NS 2048  
DS 4

SWH 34722.223 Hz  
FIDRES 0.529819 Hz  
AQ 0.9437684 sec  
RG 2050  
DW 14.400 usec  
DE 19.34 usec  
TE 300.2 K  
D1 1.10000002 sec  
D11 0.03000000 sec  
TD0 1

==== CHANNEL f1 =====  
SFO1 150.9656784 MHz  
NUC1 13C  
P1 10.63 usec

F2 - Processing parameters  
SI 32768  
SF 150.9505840 MHz  
WDW EM  
SSB 0  
LB 1.00 Hz  
GB 0  
PC 1.40



Compound 1b 19F NMR

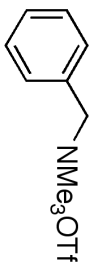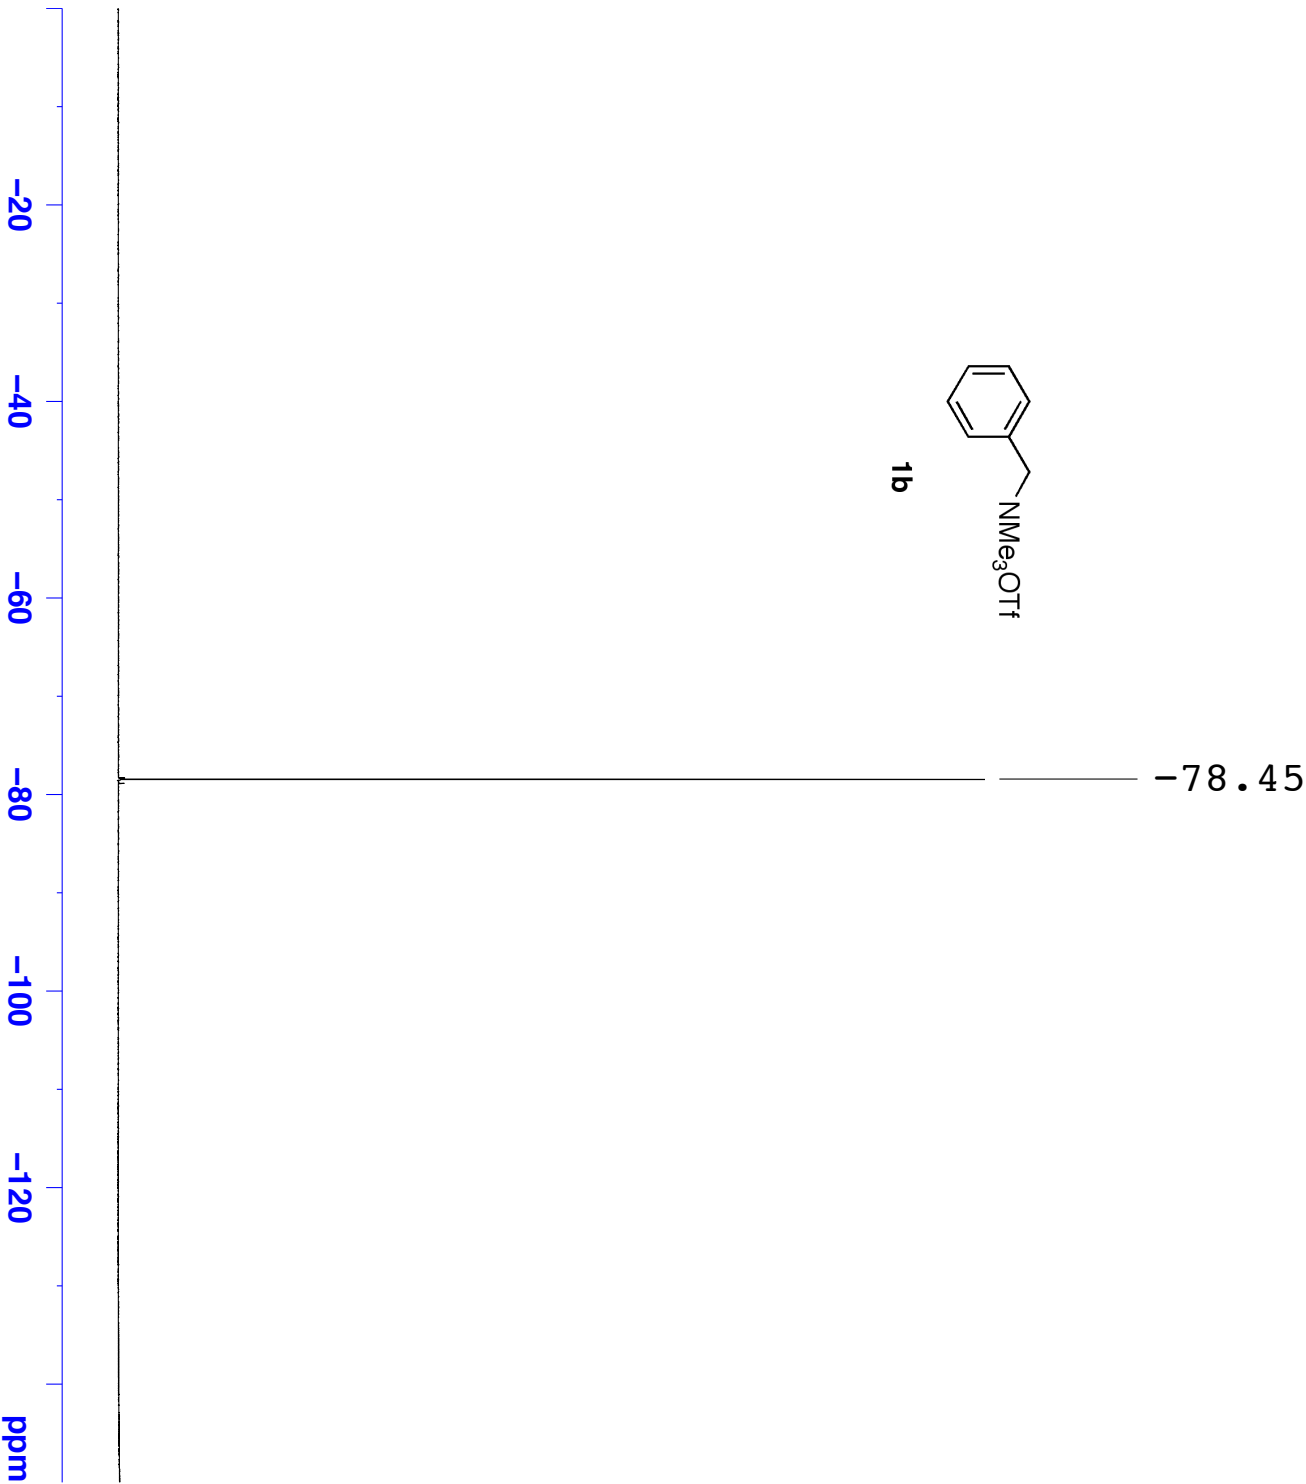

Current Data Parameters  
 NAME DMM3-CNSTI-SALIT2  
 EXPNO 3  
 PROCNO 1

F2 - Acquisition Parameters  
 Date\_ 20120803  
 Time 16.12

INSTRUM 5 mm PABBO BB/  
 PROBHD zgpg30  
 PULPROG zgpg30  
 TD 131072  
 SOLVENT CDCl3  
 NS 16  
 DS 4

SWH 133928.578 Hz  
 FIDRES 1.021794 Hz  
 AQ 0.4893855 sec

RG 406  
 DW 3.733 usec  
 DE 8.00 usec  
 TE 300.2 K  
 D1 3.00000000 sec  
 D11 0.03000000 sec  
 D12 0.00002000 sec  
 TD0 1

==== CHANNEL f1 =====  
 SF01 564.8086803 MHz  
 NUC1 19F  
 P1 11.62 usec

F2 - Processing parameters  
 SI 65536  
 SF 564.8651670 MHz  
 WDW EM  
 SSB 0  
 LB 2.00 Hz  
 GB 0  
 PC 1.00

Compound S2 1HNMR

Current Data Parameters  
 NAME DMM3-CNSI-SALT3  
 EXPNO 1  
 PROCNO 1

F2 - Acquisition Parameters

Date\_ 20120803  
 Time 20.28  
 INSTRUM spect  
 PROBHD 5 mm PABBO BB/  
 PULPROG zg30  
 TD 65536  
 SOLVENT CDCl3  
 NS 8  
 DS 2  
 SWH 8403.361 Hz  
 FIDRES 0.128225 Hz  
 AQ 3.8994420 sec  
 RG 114  
 DW 59.500 usec  
 DE 17.39 usec  
 TE 300.2 K  
 D1 1.00000000 sec  
 TD0 1

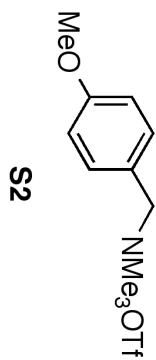

7.445  
 7.431  
 6.949  
 6.935

4.523  
 3.829  
 3.126

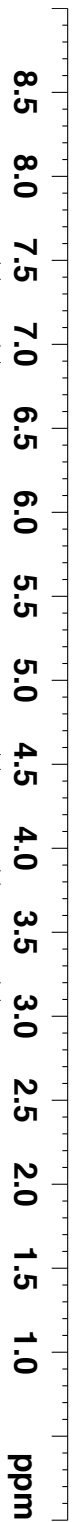

==== CHANNEL f1 =====  
 SF01 600.3233018 MHz  
 NUC1 1H  
 P1 10.77 usec

F2 - Processing parameters  
 SI 65536  
 SF 600.3200000 MHz  
 WDM EM  
 SSB 0  
 LB 0.30 Hz  
 GB 0  
 PC 1.00

Compound S2 13CNMR

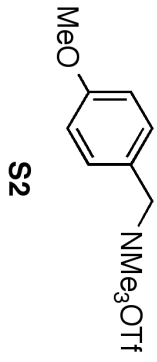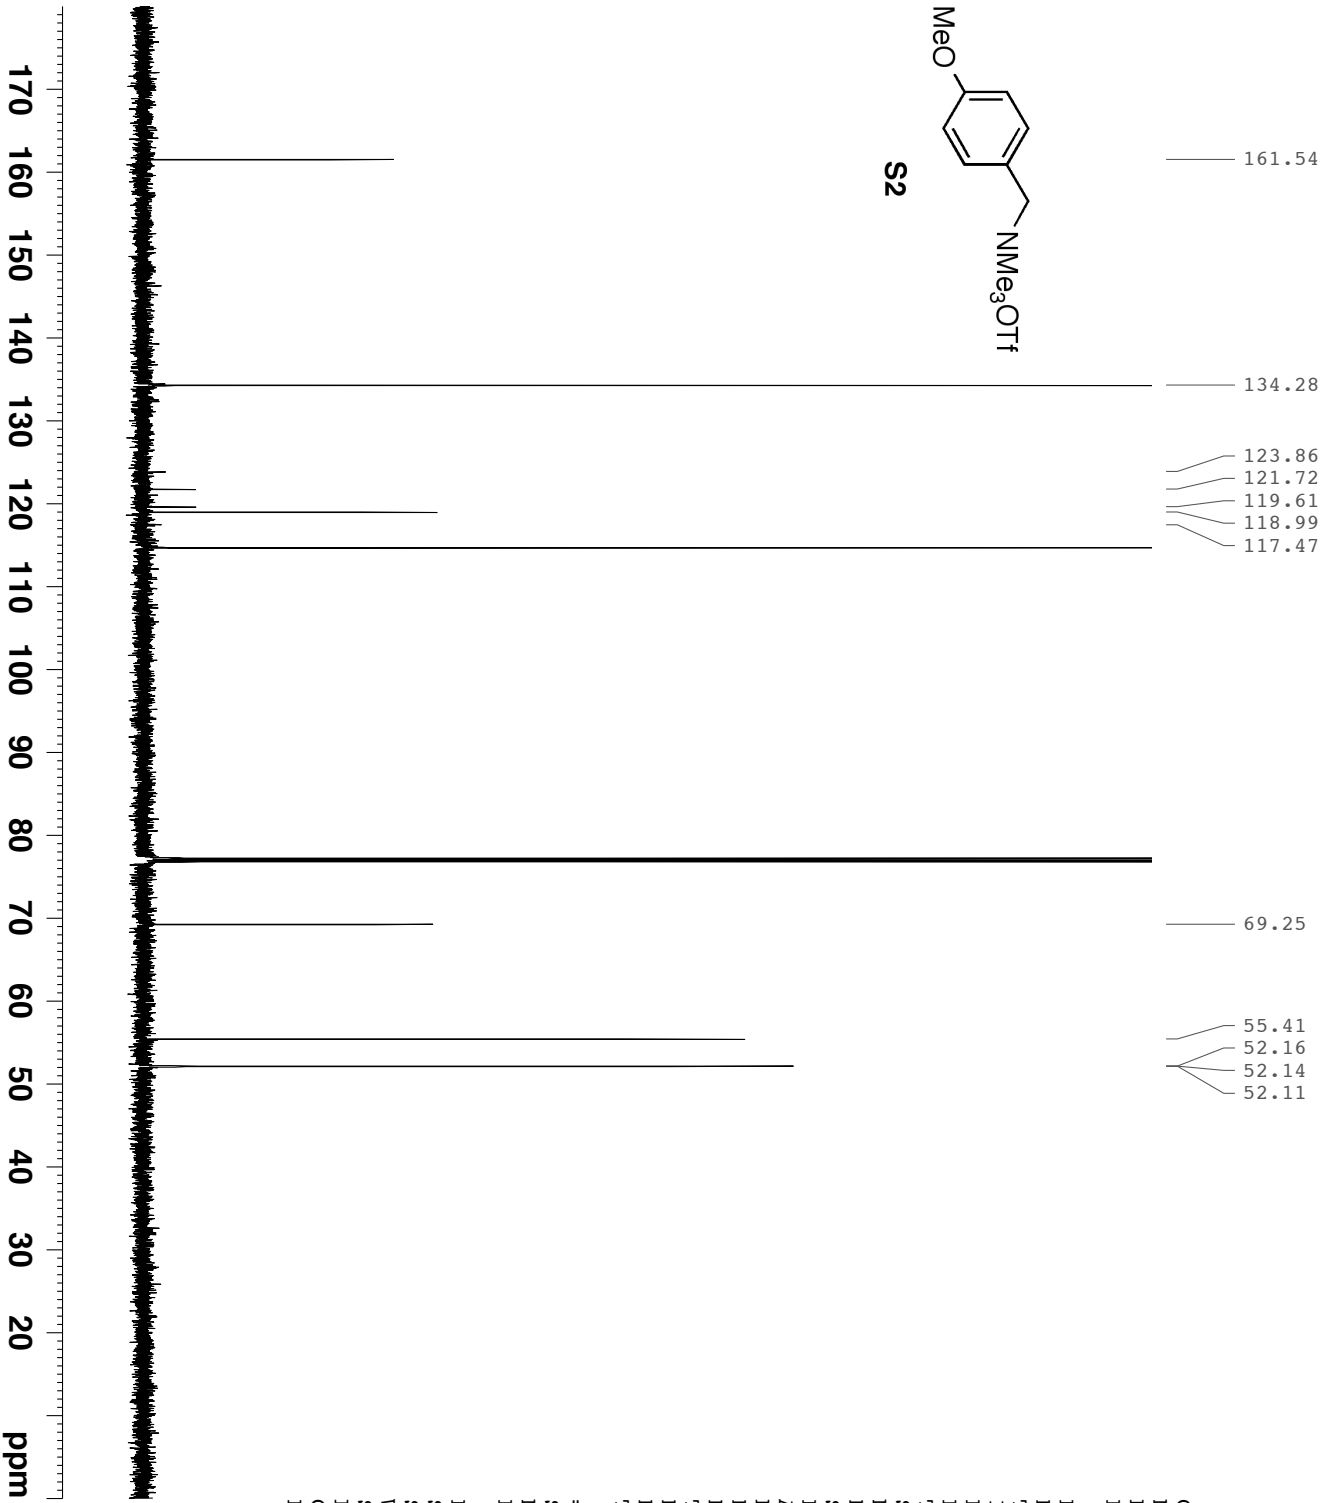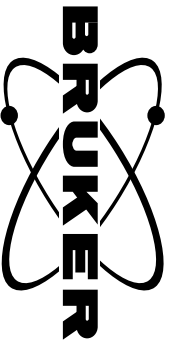

S135

Current Data Parameters  
 NAME DMM3-CNSI-SALT3  
 EXPNO 2  
 PROCNO 1

F2 - Acquisition Parameters  
 Date\_ 20120803  
 Time\_ 16.38  
 INSTRUM spect  
 PROBHD 5 mm PABBO BB/  
 PULPROG zgpg55  
 TD 65536  
 SOLVENT CDCl3  
 NS 256  
 DS 4  
 SWH 34722.223 Hz  
 FIDRES 0.529819 Hz  
 AQ 0.9437684 sec  
 RG 2050  
 DW 14.400 usec  
 DE 19.34 usec  
 TE 300.2 K  
 D1 1.10000002 sec  
 D11 0.03000000 sec  
 TD0 1

==== CHANNEL f1 =====  
 SF01 150.9656784 MHz  
 NUC1 13C  
 P1 10.63 usec

F2 - Processing parameters  
 SI 32768  
 SF 150.9505840 MHz  
 WDW EM  
 SSB 0  
 LB 1.00 Hz  
 GB 0  
 PC 1.40

Compound S2 19F NMR

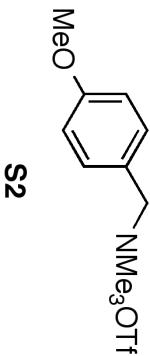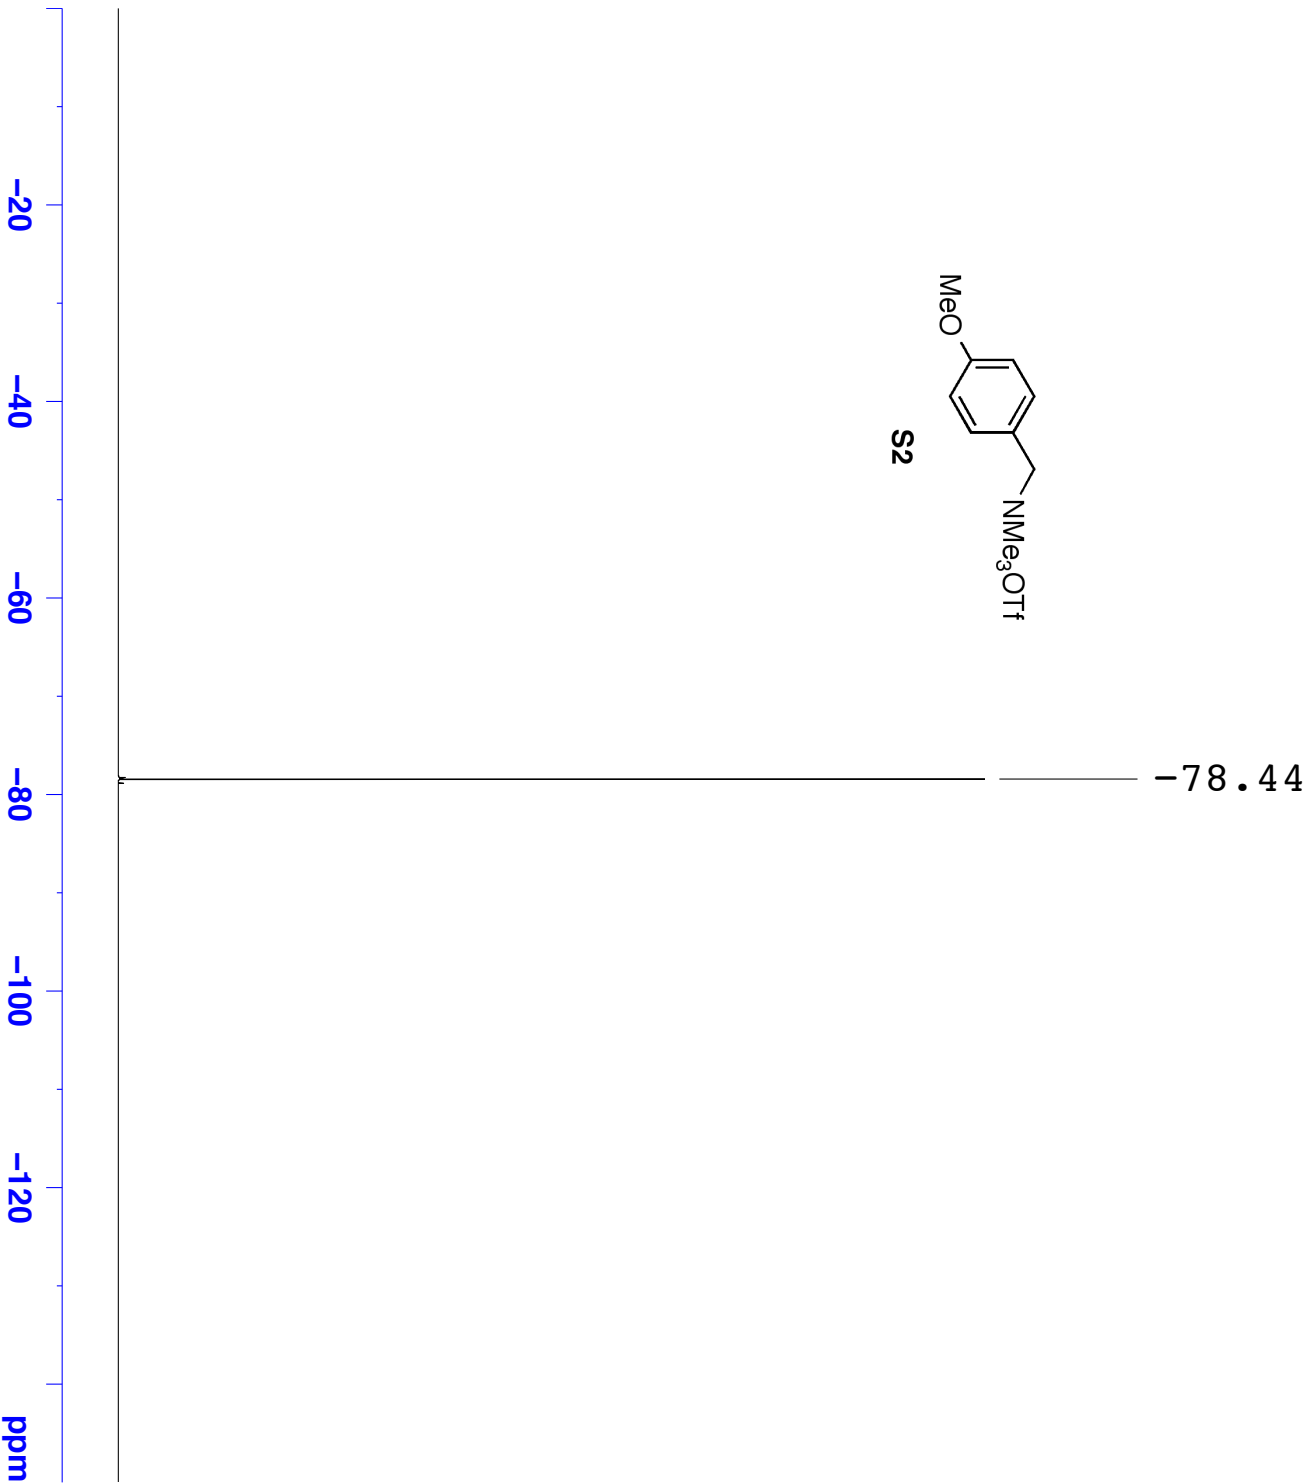

Current Data Parameters  
 NAME DM3-CNSI-SALT3  
 EXPNO 3  
 PROCNO 1

F2 - Acquisition Parameters

Date\_ 20120803  
 Time 16.40  
 INSTRUM spect  
 PROBHD 5 mm PABBO BB/  
 PULPROG zgfhigqn  
 TD 131072  
 SOLVENT CDC13  
 NS 16  
 DS 4

SWH 133928.578 Hz  
 FIDRES 1.021794 Hz  
 AQ 0.4893855 sec  
 RG 322  
 DW 3.733 usec  
 DE 8.00 usec  
 TE 300.2 K  
 D1 3.00000000 sec  
 D11 0.03000000 sec  
 D12 0.00002000 sec  
 TD0 1

==== CHANNEL f1 =====  
 SFO1 564.8086803 MHz  
 NUC1 19F  
 P1 11.62 usec

F2 - Processing parameters

SI 65536  
 SF 564.8651670 MHz  
 WDW EM  
 SSB 0  
 LB 2.00 Hz  
 GB 0  
 PC 1.00

Compound S3 1HNMR

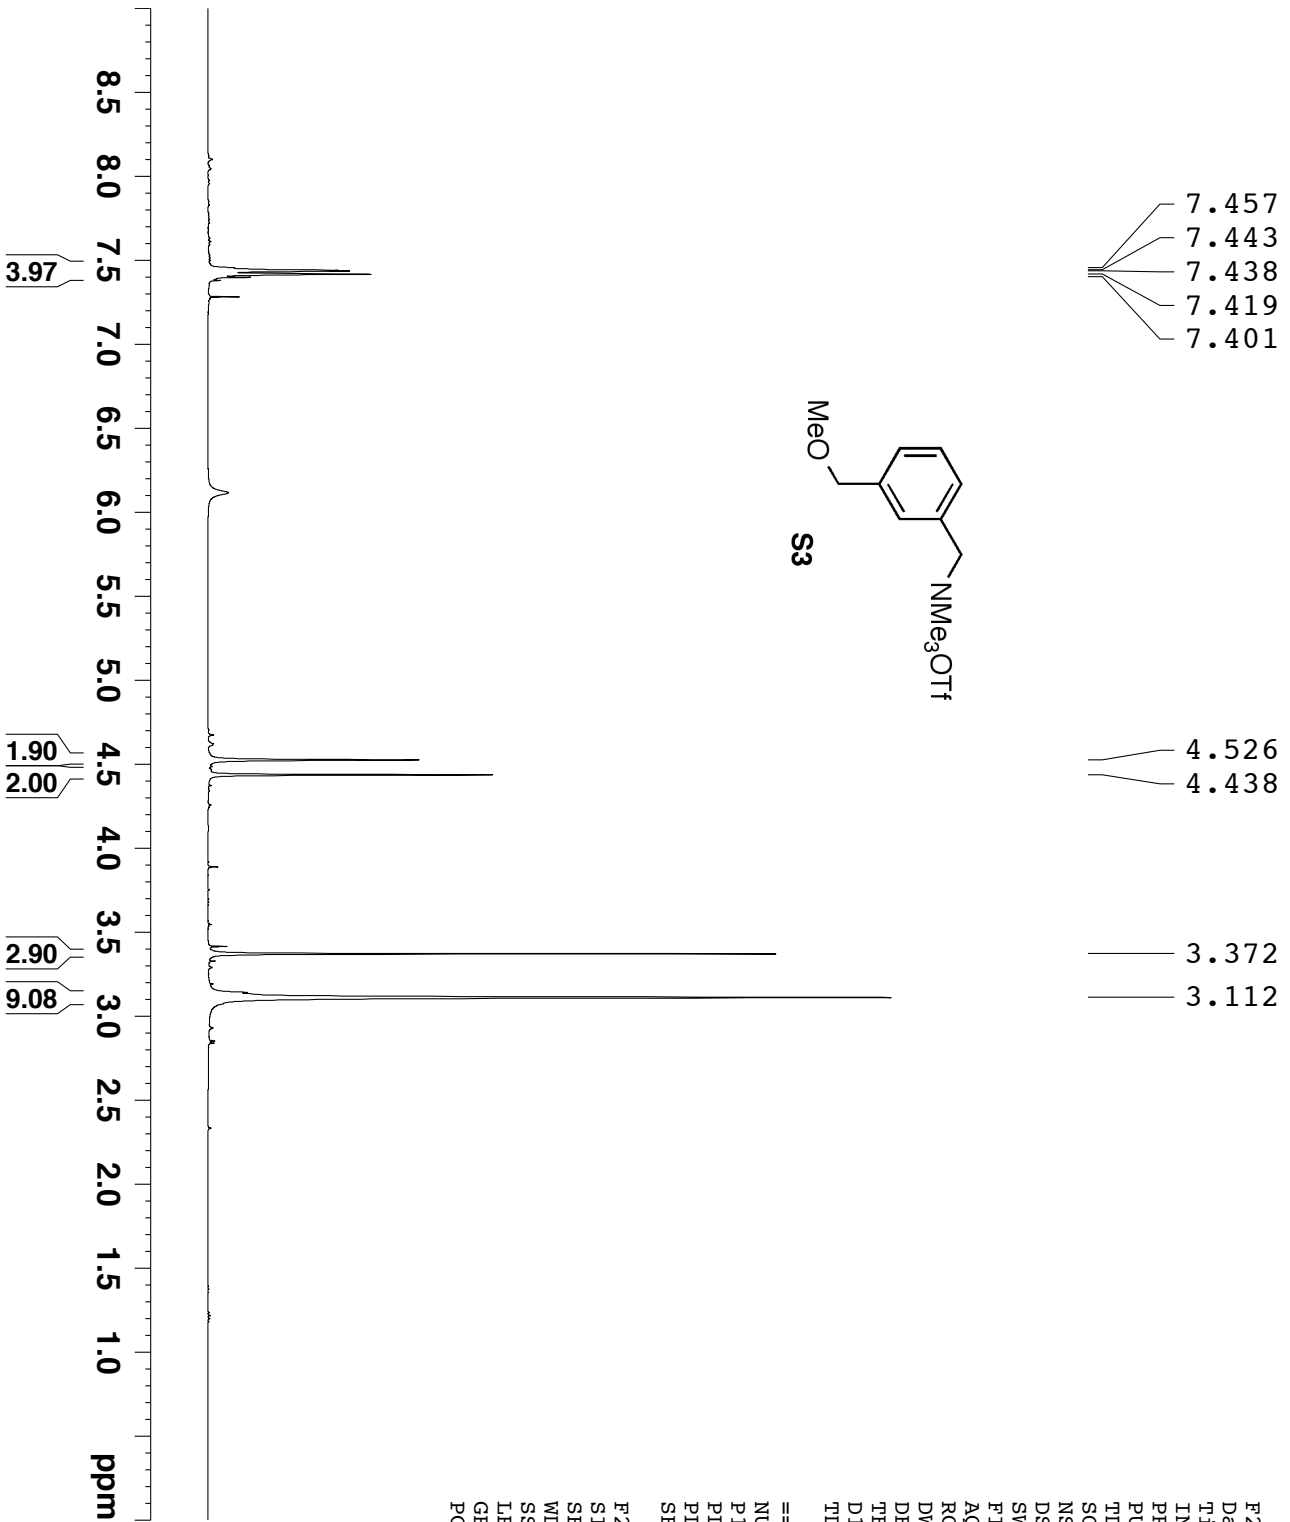

Current Data Parameters  
 NAME DMM3-BN-OMe-SALT  
 EXPNO 1  
 PROCNO 1

F2 - Acquisition Parameters

Date\_ 20120721  
 Time 16.17  
 INSTRUM spect  
 PROBHD 5 mm CPQNP 1H/  
 PULPROG zg30  
 TD 65536  
 SOLVENT CDCl3  
 NS 16  
 DS 2  
 SWH 8278.146 Hz  
 FIDRES 0.126314 Hz  
 AQ 3.9584243 sec  
 RG 11.3  
 DW 60.400 usec  
 DE 6.00 usec  
 TE 298.2 K  
 D1 1.00000000 sec  
 TD0 1

==== CHANNEL f1 =====

NUC1 1H  
 P1 15.00 usec  
 PL1 4.90 dB  
 P1LW 3.30822015 W  
 SF01 400.1324710 MHz

F2 - Processing parameters

SI 32768  
 SF 400.1300000 MHz  
 WDW EM  
 SSB 0  
 LB 0.30 Hz  
 GB 0  
 PC 1.00

Compound s3 13CNMR



139.67  
132.09  
131.79  
130.08  
129.43  
127.32  
125.30  
122.12  
118.94  
115.77

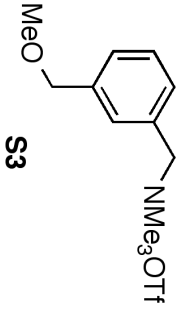

73.77  
69.28  
58.37  
52.37

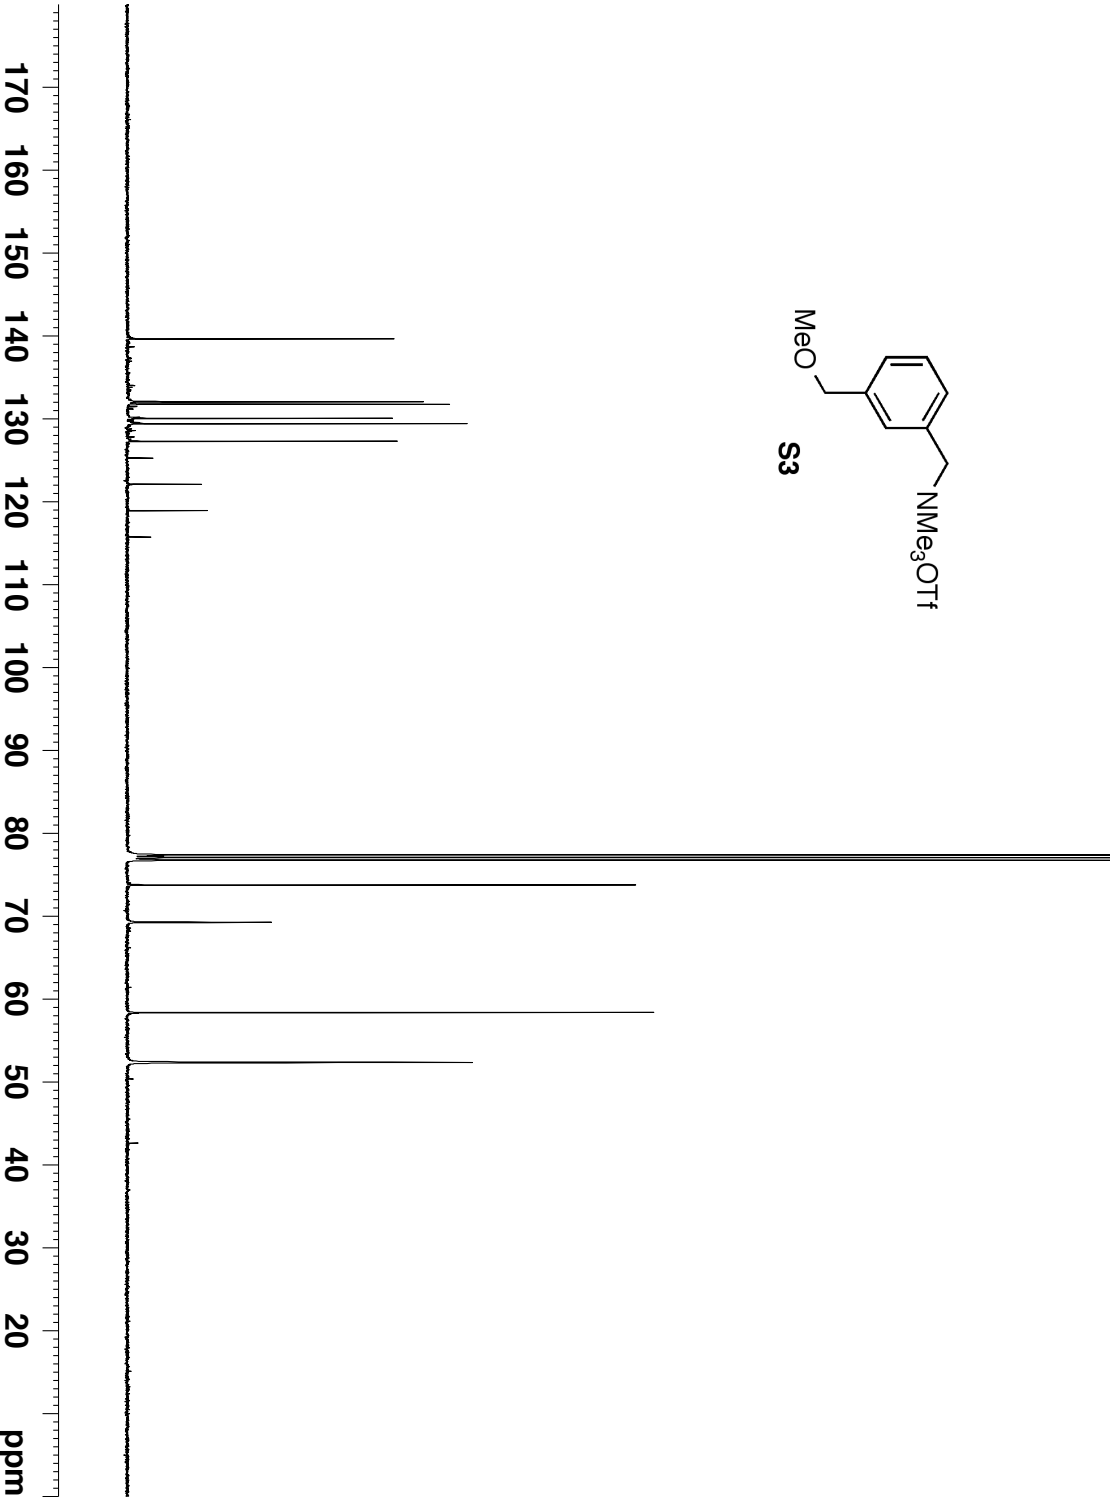

Current Data Parameters  
NAME DMF3-BN-OMe-SALT  
EXPNO 2  
PROCNO 1

F2 - Acquisition Parameters

Date\_ 20120721  
Time 16.33  
INSTRUM spect  
PROBHD 5 mm CPQNP 1H/  
PULPROG zgpg30  
TD 65536  
SOLVENT CDCl3  
NS 256  
DS 4  
SWH 23980.814 Hz  
FIDRES 0.365918 Hz  
AQ 1.3664756 sec  
RG 512  
DW 20.850 usec  
DE 18.00 usec  
TE 298.1 K  
D1 2.00000000 sec  
D11 0.03000000 sec  
TD0 1

==== CHANNEL F1 =====  
NUC1 13C  
P1 9.25 usec  
PL1 0.55 dB  
PL1W 35.18820572 W  
SFO1 100.6228298 MHz

==== CHANNEL F2 =====  
CPDPRG2 waltz16  
NUC2 1H  
PCPD2 90.00 usec  
PL2 4.90 dB  
PL12 20.46 dB  
PL13 21.00 dB  
PL12W 3.30822015 W  
PL12W 0.09195905 W  
PL13W 0.08120718 W  
SFO2 400.1316005 MHz

F2 - Processing parameters  
SI 32768  
SF 100.6127690 MHz  
WDW EM  
SSB 0  
LB 1.00 Hz  
GB 0  
PC 1.40

Compound s3 19F NMR

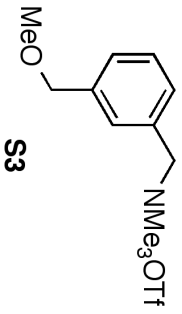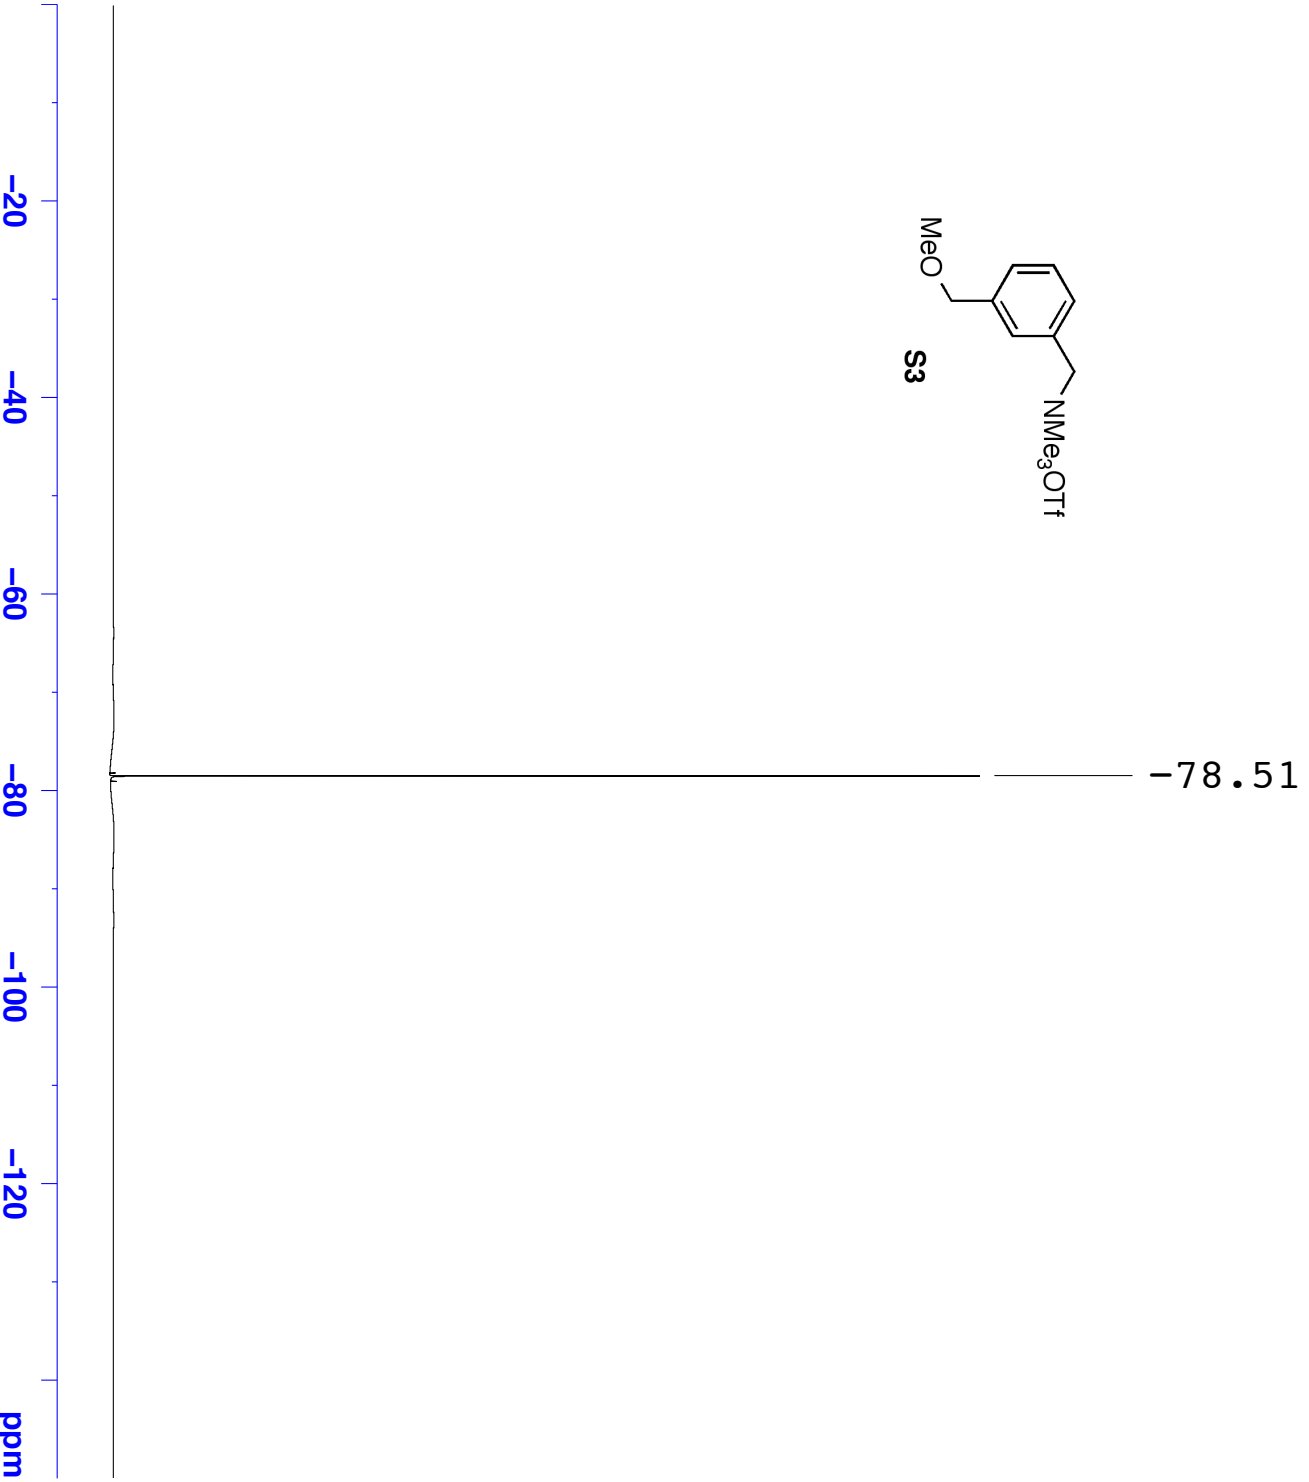

Current Data Parameters  
 NAME DM3-BN-OMe-SALT  
 EXPNO 3  
 PROCNO 1  
 S139

F2 - Acquisition Parameters:  
 Date\_ 20120721  
 Time 16.36  
 INSTRUM spect  
 PROBHD 5 mm CPQNP 1H/  
 PULPROG zgpgc  
 TD 131072  
 SOLVENT CDCl3  
 NS 16  
 DS 2  
 SWH 75187.969 H:  
 FIDRES 0.573639 H:  
 AQ 0.8716788 s  
 RG 322.5  
 DW 6.650 u:  
 DE 20.00 u:  
 TE 298.2 K  
 D1 2.0000000 s  
 D11 0.03000000 s  
 TD0 1

==== CHANNEL f1 =====  
 NUC1 19F  
 P1 15.03 u:  
 PL1 -4.00 dI  
 PL1W 25.74305916 W  
 SFO1 376.4607164 Ml

==== CHANNEL f2 =====  
 CPDPRG2 waltz16  
 NUC2 1H  
 PCPD2 90.00 u:  
 PL2 4.90 dI  
 PL12 20.46 dI  
 PL2W 3.30822015 W  
 PL12W 0.09195905 W  
 SFO2 400.1316005 Ml

F2 - Processing parameter:  
 SI 65536  
 SF 376.4983660 Ml  
 WDM EM  
 SSB 0  
 LB 2.00 H:  
 GB 0  
 PC 1.00

Compound S4 1H NMR

Current Data Parameters  
 NAME DM3-CNSI-SALT5  
 EXPNO 1  
 PROCNO 1

F2 - Acquisition Parameters

Date\_ 20120803  
 Time 20.01  
 INSTRUM spect  
 PROBHD 5 mm PABBO BB/  
 PULPROG zg30  
 TD 65536  
 SOLVENT Acetone  
 NS 8  
 DS 2  
 SWH 8403.361 Hz  
 FIDRES 0.128225 Hz  
 AQ 3.8994420 sec  
 RG 181  
 DW 59.500 usec  
 DE 17.39 usec  
 TE 300.2 K  
 D1 1.00000000 sec  
 TD0 1

==== CHANNEL f1 =====

SF01 600.3233018 MHz  
 NUC1 1H  
 P1 10.77 usec

F2 - Processing parameters

SI 65536  
 SF 600.320000 MHz  
 WDM EM  
 SSB 0  
 LB 0.30 Hz  
 GB 0  
 PC 1.00

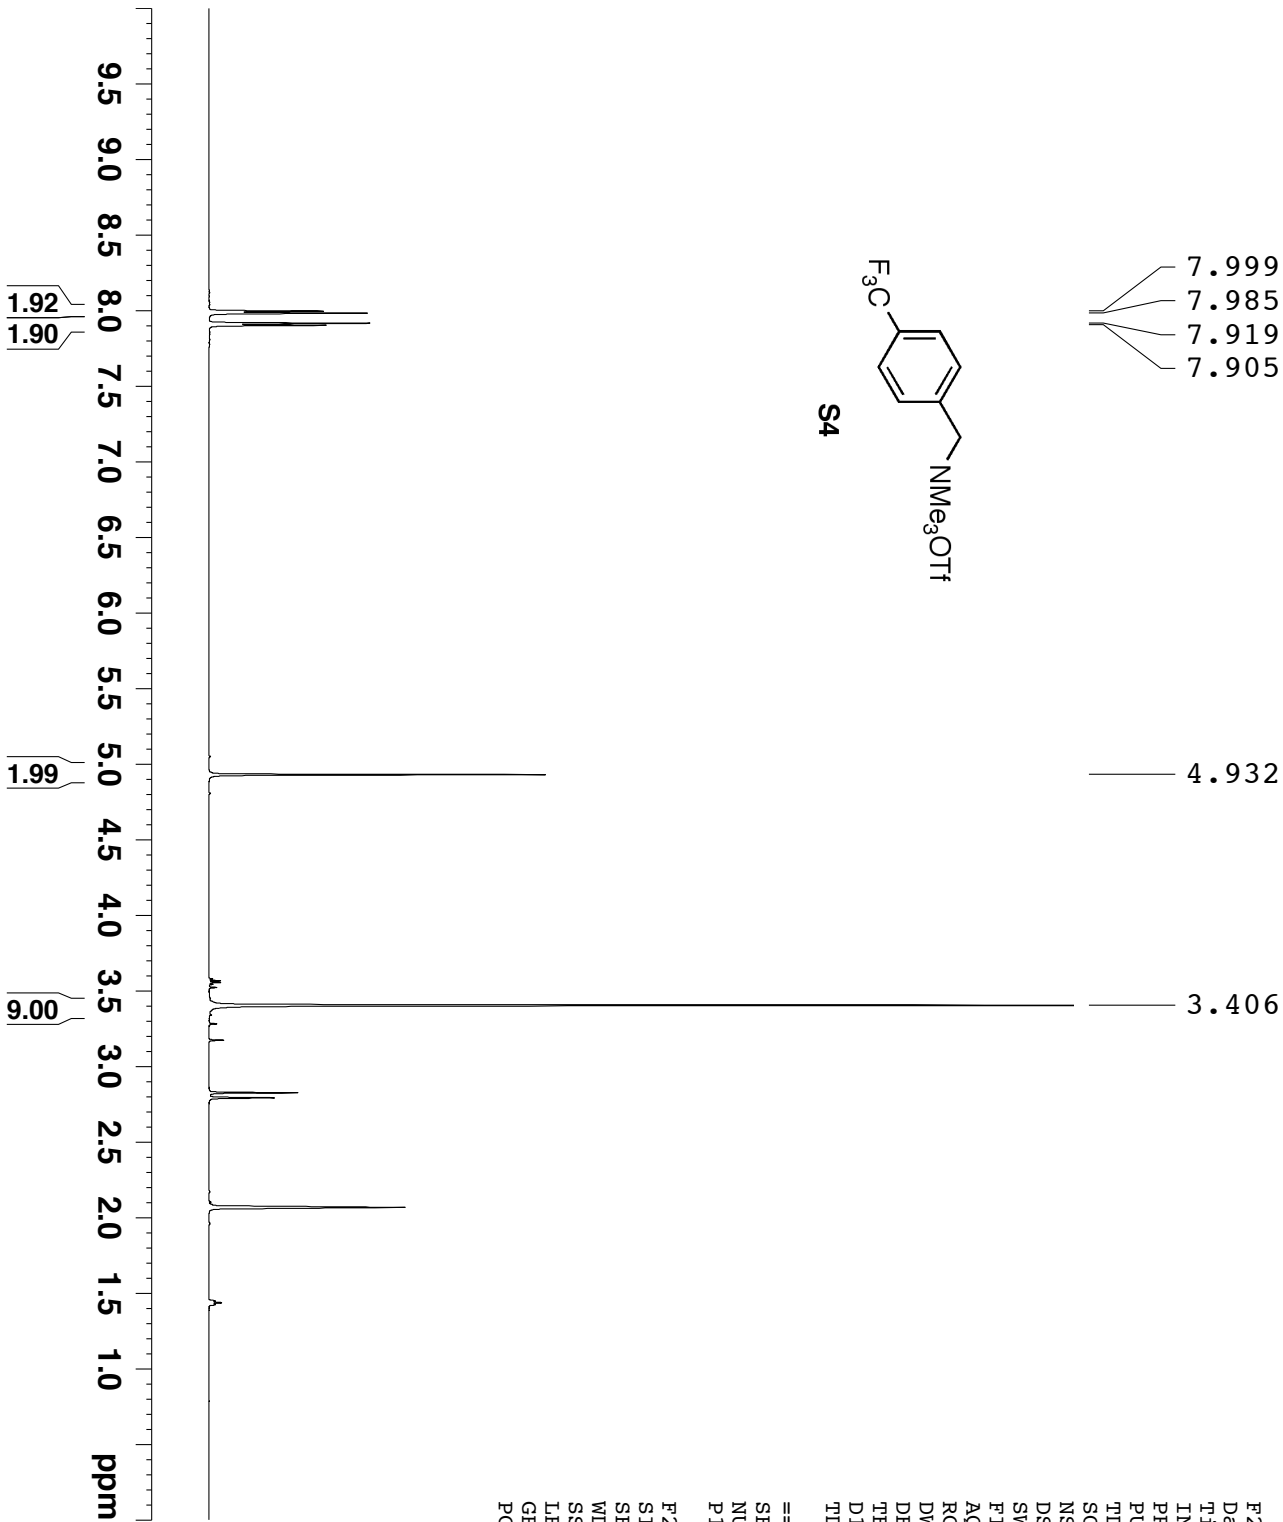



Compound S4 13CNMR



S141

Current Data Parameters  
 NAME DM3-CNSI-SALT05-C2  
 EXPNO 1  
 PROCNO 1

F2 - Acquisition Parameters

Date\_ 20120807  
 Time\_ 23.19  
 INSTRUM spect  
 PROBHD 5 mm PABBO BB/  
 PULPROG zgpg55  
 TD 65536  
 SOLVENT Acetone  
 NS 2048  
 DS 4  
 SWH 34722.223 Hz  
 FIDRES 0.529819 Hz  
 AQ 0.9437684 sec  
 RG 2050  
 DW 14.400 usec  
 DE 19.34 usec  
 TE 300.2 K  
 D1 1.1000002 sec  
 D11 0.0300000 sec  
 TD0 1

==== CHANNEL f1 =====  
 SFO1 150.9656784 MHz  
 NUC1 13C  
 P1 10.63 usec

F2 - Processing parameters

SI 32768  
 SF 150.9505840 MHz  
 WDW EM  
 SSB 0  
 LB 1.00 Hz  
 GB 0  
 PC 1.40

- 133.99
- 132.59
- 132.12
- 131.91
- 131.69
- 131.47
- 126.78
- 125.96
- 125.93
- 125.91
- 125.89
- 124.98
- 124.55
- 123.18
- 122.42
- 121.38
- 118.17

- 29.33
- 29.20
- 29.07
- 28.95
- 28.82
- 28.69
- 28.56

67.95

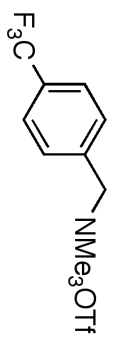

S4

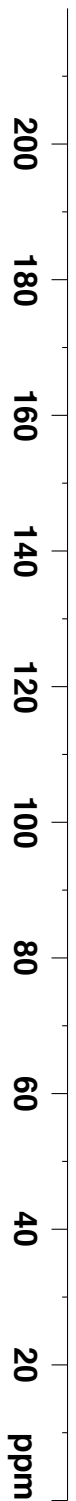

Compound S4 19F NMR

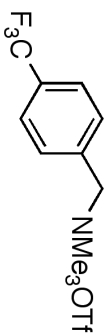

S4

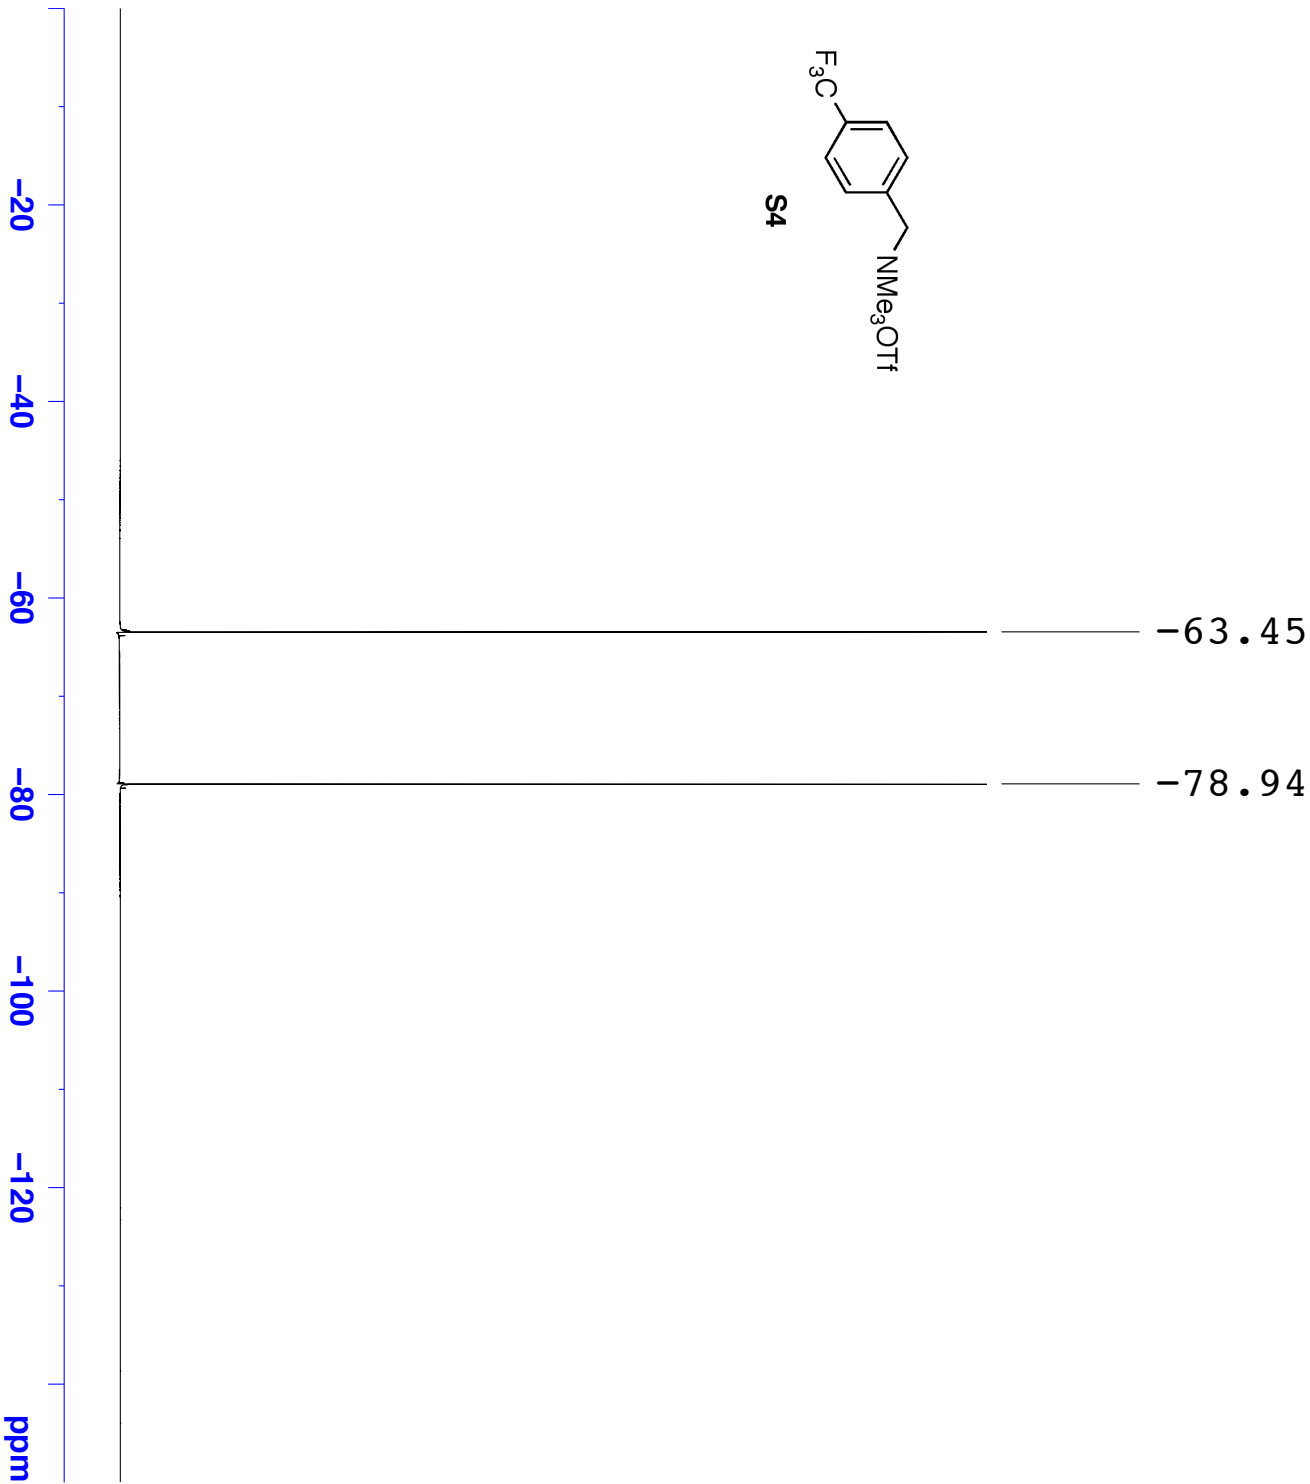

Current Data Parameters  
 NAME DM3-CNSI-SALT5  
 EXPNO 3  
 PROCNO 1

F2 - Acquisition Parameters

Date\_ 20120803  
 Time 20.15  
 INSTRUM spect  
 PROBHD 5 mm PABBO BB/  
 PULPROG zgfhigqn  
 TD 131072  
 SOLVENT Acetone  
 NS 16  
 DS 4  
 SWH 133928.578 Hz  
 FIDRES 1.021794 Hz  
 AQ 0.4893855 sec  
 RG 456  
 DW 3.733 usec  
 DE 8.00 usec  
 TE 300.2 K  
 D1 3.00000000 sec  
 D11 0.03000000 sec  
 D12 0.00002000 sec  
 TD0 1

==== CHANNEL f1 =====  
 SFO1 564.8086803 MHz  
 NUC1 19F  
 P1 11.62 usec

F2 - Processing parameters

SI 65536  
 SF 564.8651670 MHz  
 WDW EM  
 SSB 0  
 LB 2.00 Hz  
 GB 0  
 PC 1.00

Compound s5 1HNMR

7.381  
7.368  
7.354  
7.102  
7.086  
7.073  
7.040  
7.037  
7.026  
7.024

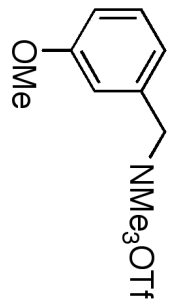

4.583  
3.835  
3.195

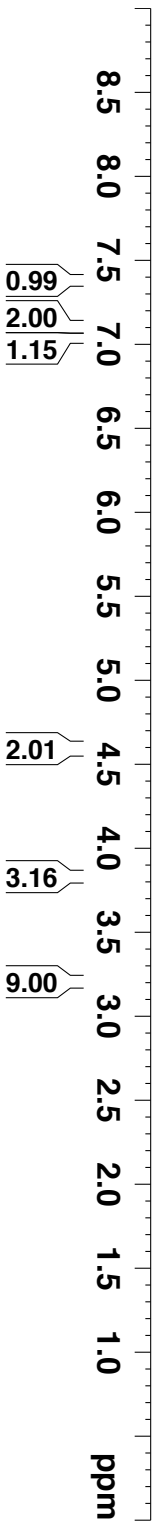

Current Data Parameters  
NAME DM3-CNSI-SALT6  
EXPNO 1  
PROCNO 1

F2 - Acquisition Parameters

Date\_ 20120803  
Time 16.44  
INSTRUM spect  
PROBHD 5 mm PABBO BB/  
PULPROG zg30  
TD 65536  
SOLVENT CDCl3  
NS 8  
DS 2  
SWH 8403.361 Hz  
FIDRES 0.128225 Hz  
AQ 3.8994420 sec  
RG 161  
DW 59.500 usec  
DE 17.39 usec  
TE 300.2 K  
D1 1.00000000 sec  
TD0 1

==== CHANNEL f1 =====

SFO1 600.3233018 MHz  
NUC1 1H  
P1 10.77 usec

F2 - Processing parameters

SI 65536  
SF 600.3200000 MHz  
WDW EM  
SSB 0  
LB 0.30 Hz  
GB 0  
PC 1.00

Compound **S5** <sup>13</sup>CNMR



S144

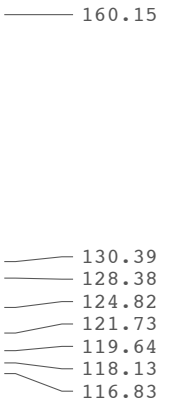

Current Data Parameters  
 NAME DMM3-CNSI-SALT6  
 EXPNO 2  
 PROCNO 1

F2 - Acquisition Parameters  
 Date\_ 20120803  
 Time\_ 16.55

INSTRUM spect  
 PROBHD 5 mm PABBO BB/  
 PULPROG zgpg35  
 TD 65536  
 SOLVENT CDCl3  
 NS 256  
 DS 4  
 SWH 34722.223 Hz  
 FIDRES 0.529819 Hz  
 AQ 0.9437684 sec  
 RG 2050  
 DW 14.400 usec  
 DE 19.34 usec  
 TE 300.2 K  
 D1 1.10000002 sec  
 D11 0.03000000 sec  
 TD0 1

==== CHANNEL f1 =====  
 SF01 150.9656784 MHz  
 NUC1 13C  
 P1 10.63 usec

F2 - Processing parameters  
 SI 32768  
 SF 150.9505840 MHz  
 WDW EM  
 SSB 0  
 LB 1.00 Hz  
 GB 0  
 PC 1.40

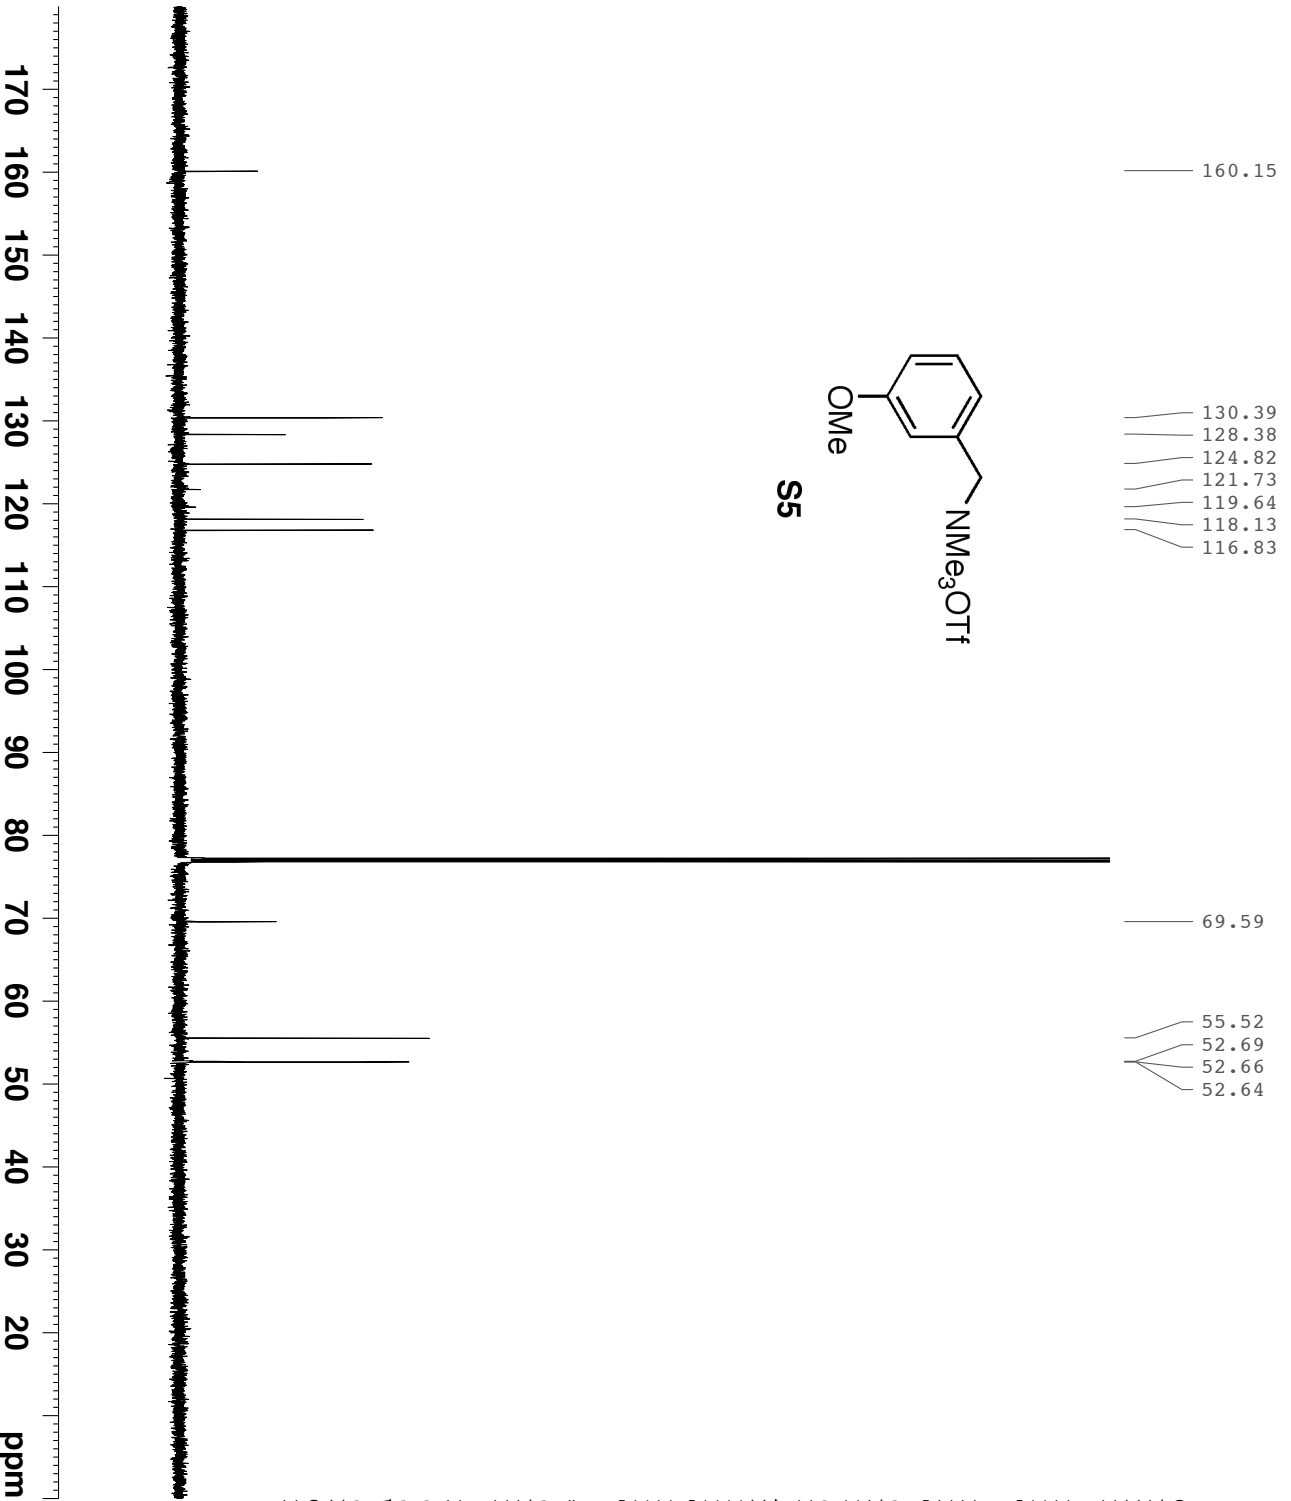

Compound S5 19F NMR

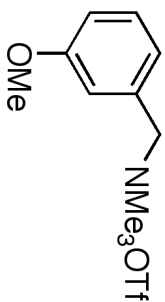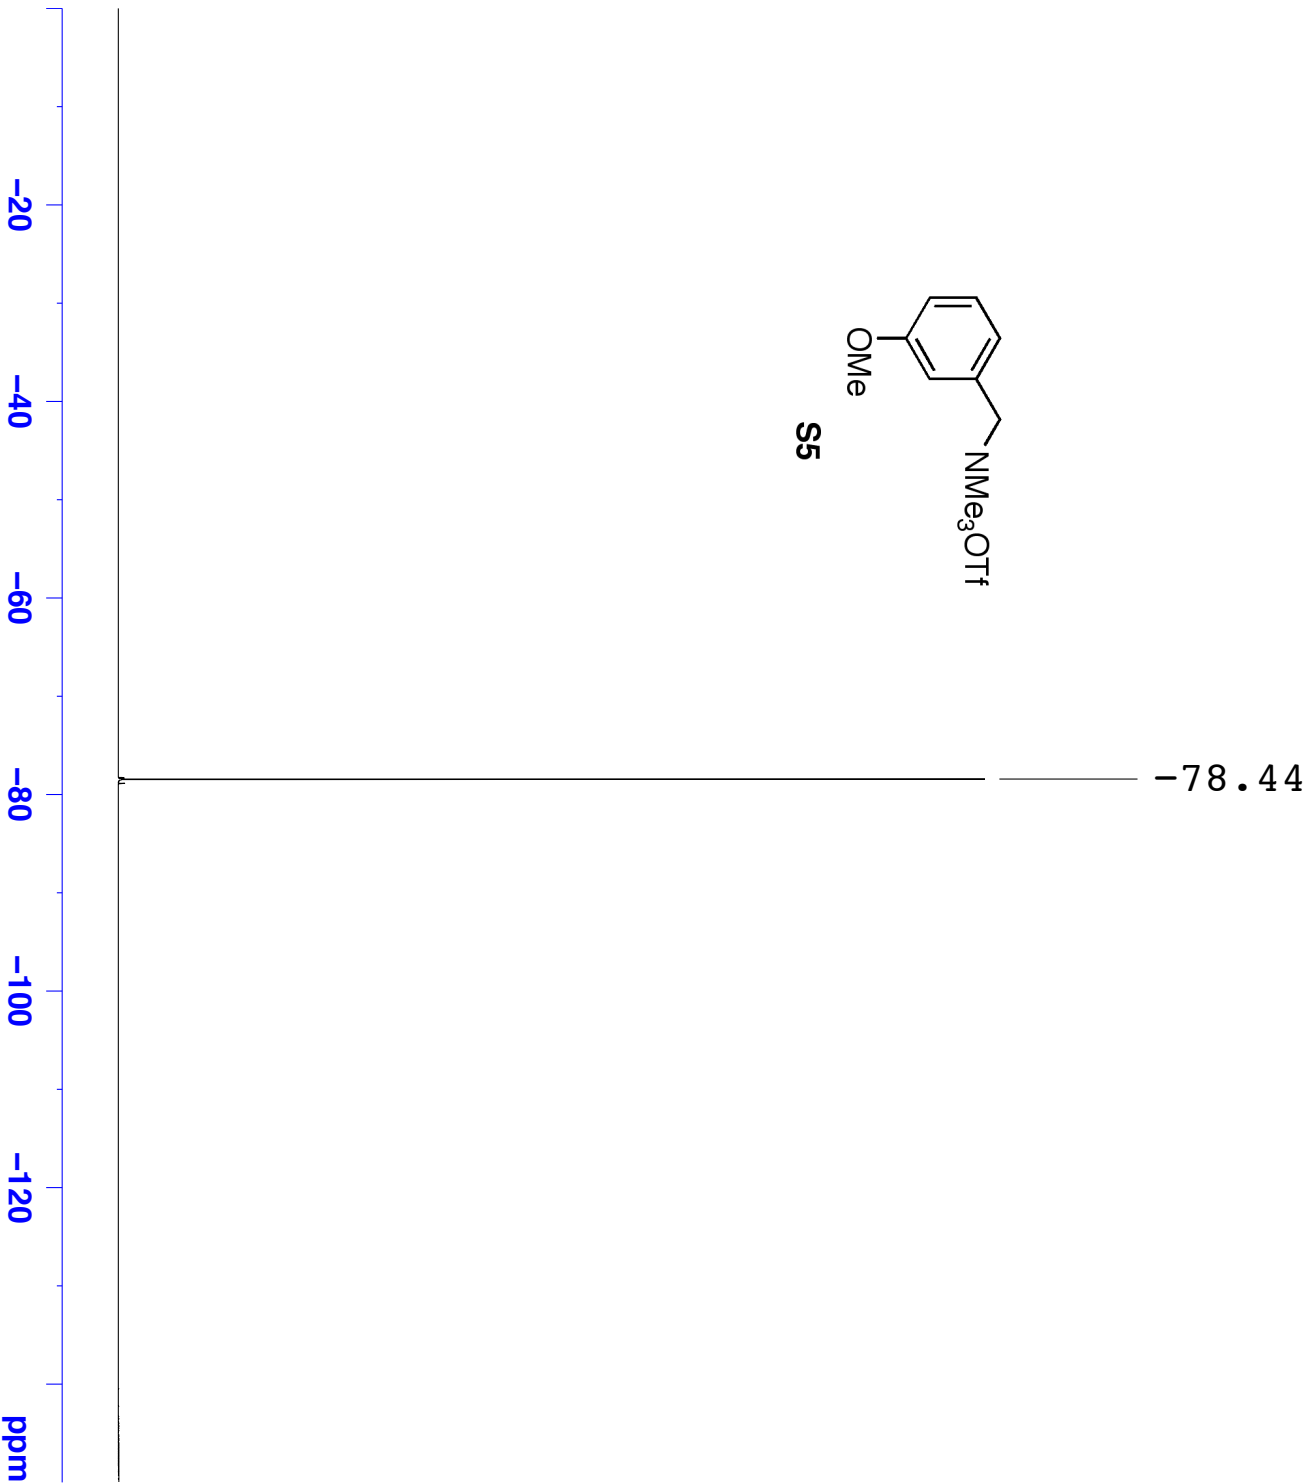

Current Data Parameters  
 NAME DM3-CNSI-SALT6  
 EXPNO 3  
 PROCNO 1

F2 - Acquisition Parameters

Date\_ 20120803  
 Time\_ 16.57  
 INSTRUM spect  
 PROBHD 5 mm PABBO BB/  
 PULPROG zgfhgqn  
 TD 131072  
 SOLVENT CDCl3  
 NS 16  
 DS 4  
 SWH 133928.578 Hz  
 FIDRES 1.021794 Hz  
 AQ 0.4893855 sec  
 RG 362  
 DW 3.733 usec  
 DE 8.00 usec  
 TE 300.2 K  
 D1 3.00000000 sec  
 D11 0.03000000 sec  
 D12 0.00002000 sec  
 TD0 1

==== CHANNEL f1 =====

SFO1 564.8086803 MHz  
 NUC1 19F  
 P1 11.62 usec

F2 - Processing parameters

SI 65536  
 SF 564.8651670 MHz  
 WDW EM  
 SSB 0  
 LB 2.00 Hz  
 GB 0  
 PC 1.00

Compound **S6** <sup>1</sup>H NMR

7.520  
7.506  
7.492  
7.083  
7.070  
7.058  
7.026  
7.012

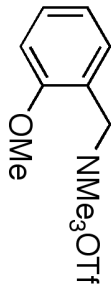

4.587  
3.908  
3.203

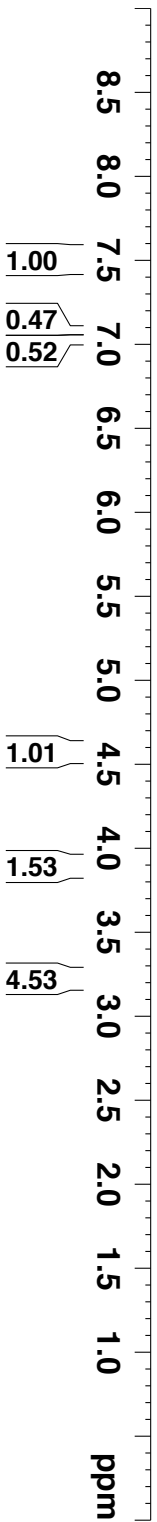

Current Data Parameters  
NAME DM3-CNSI-SALT7  
EXPNO 1  
PROCNO 1

F2 - Acquisition Parameters

Date\_ 20120803  
Time 17.00  
INSTRUM spect  
PROBHD 5 mm PABBO BB/  
PULPROG zg30  
TD 65536  
SOLVENT CDCl3  
NS 8  
DS 2  
SWH 8403.361 Hz  
FIDRES 0.128225 Hz  
AQ 3.8994420 sec  
RG 161  
DW 59.500 usec  
DE 17.39 usec  
TE 300.2 K  
D1 1.00000000 sec  
TD0 1

==== CHANNEL f1 =====

SFO1 600.3233018 MHz  
NUC1 1H  
P1 10.77 usec

F2 - Processing parameters

SI 65536  
SF 600.3200000 MHz  
WDW EM  
SSB 0  
LB 0.30 Hz  
GB 0  
PC 1.00

Compound **S6** 13CNMR

|        |
|--------|
| 158.70 |
| 135.06 |
| 133.05 |
| 123.92 |
| 121.80 |
| 119.67 |
| 117.56 |
| 115.56 |
| 111.56 |
| 64.37  |
| 64.35  |
| 64.34  |
| 55.67  |
| 52.90  |
| 52.87  |
| 52.84  |

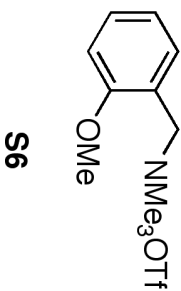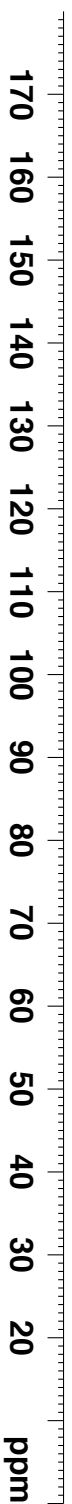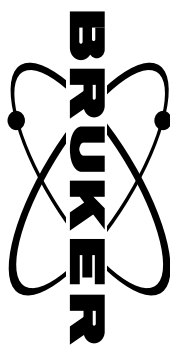

S147

Current Data Parameters  
 NAME DMM3-CNSI-SALT-07C  
 EXPNO 1  
 PROCNO 1

F2 - Acquisition Parameters  
 Date\_ 20120805  
 Time\_ 0.58  
 INSTRUM spect  
 PROBHD 5 mm PABBO BB/  
 PULPROG zgpg35  
 TD 65536  
 SOLVENT CDCl3  
 NS 2048  
 DS 4  
 SWH 34722.223 Hz  
 FIDRES 0.529819 Hz  
 AQ 0.9437684 sec  
 RG 2050  
 DW 14.400 usec  
 DE 19.34 usec  
 TE 300.2 K  
 D1 1.10000002 sec  
 D11 0.03000000 sec  
 TD0 1

==== CHANNEL f1 =====  
 SF01 150.9656784 MHz  
 NUC1 13C  
 P1 10.63 usec

F2 - Processing parameters  
 SI 32768  
 SF 150.9505840 MHz  
 WDW EM  
 SSB 0  
 LB 1.00 Hz  
 GB 0  
 PC 1.40

Compound **S6** 19F NMR

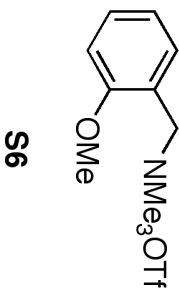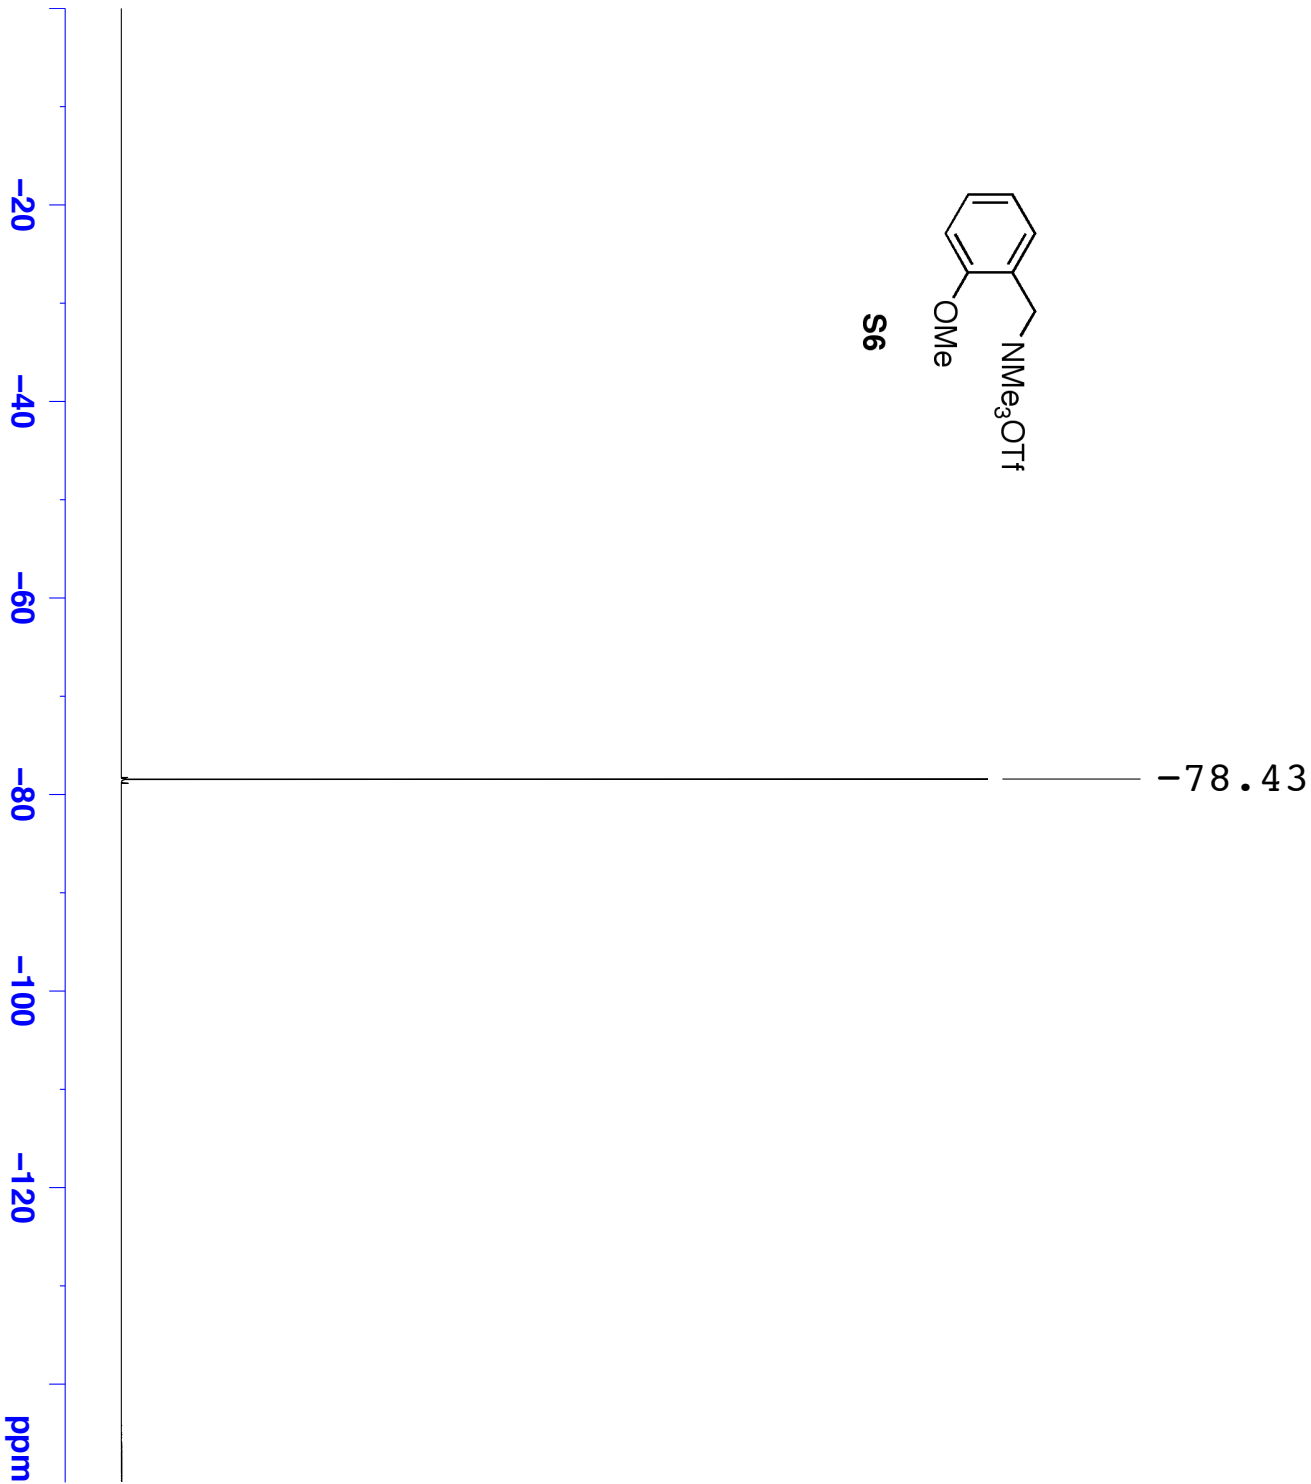

Current Data Parameters  
 NAME DMM3-CNSTI-SALT7  
 EXPNO 3  
 PROCNO 1

F2 - Acquisition Parameters

Date\_ 20120803  
 Time\_ 17.14  
 INSTRUM spect  
 PROBHD 5 mm PABBO\_BB/  
 PULPROG zgpg30  
 TD 131072  
 SOLVENT CDCl3  
 NS 16  
 DS 4  
 SWH 133928.578 Hz  
 FIDRES 1.021794 Hz  
 AQ 0.4893855 sec  
 RG 362  
 DW 3.733 usec  
 DE 8.00 usec  
 TE 300.2 K  
 D1 3.00000000 sec  
 D11 0.03000000 sec  
 D12 0.00002000 sec  
 TD0 1

==== CHANNEL f1 =====  
 SF01 564.8086803 MHz  
 NUC1 19F  
 P1 11.62 usec

F2 - Processing parameters

SI 65536  
 SF 564.8651670 MHz  
 WDW EM  
 SSB 0  
 LB 2.00 Hz  
 GB 0  
 PC 1.00



Compound **47**, <sup>1</sup>H NMR

7.791  
7.779  
7.625  
7.612  
7.600  
7.587  
7.575  
7.512  
7.500  
7.499

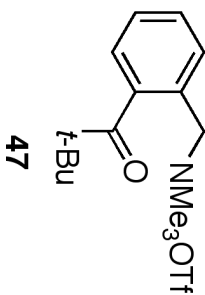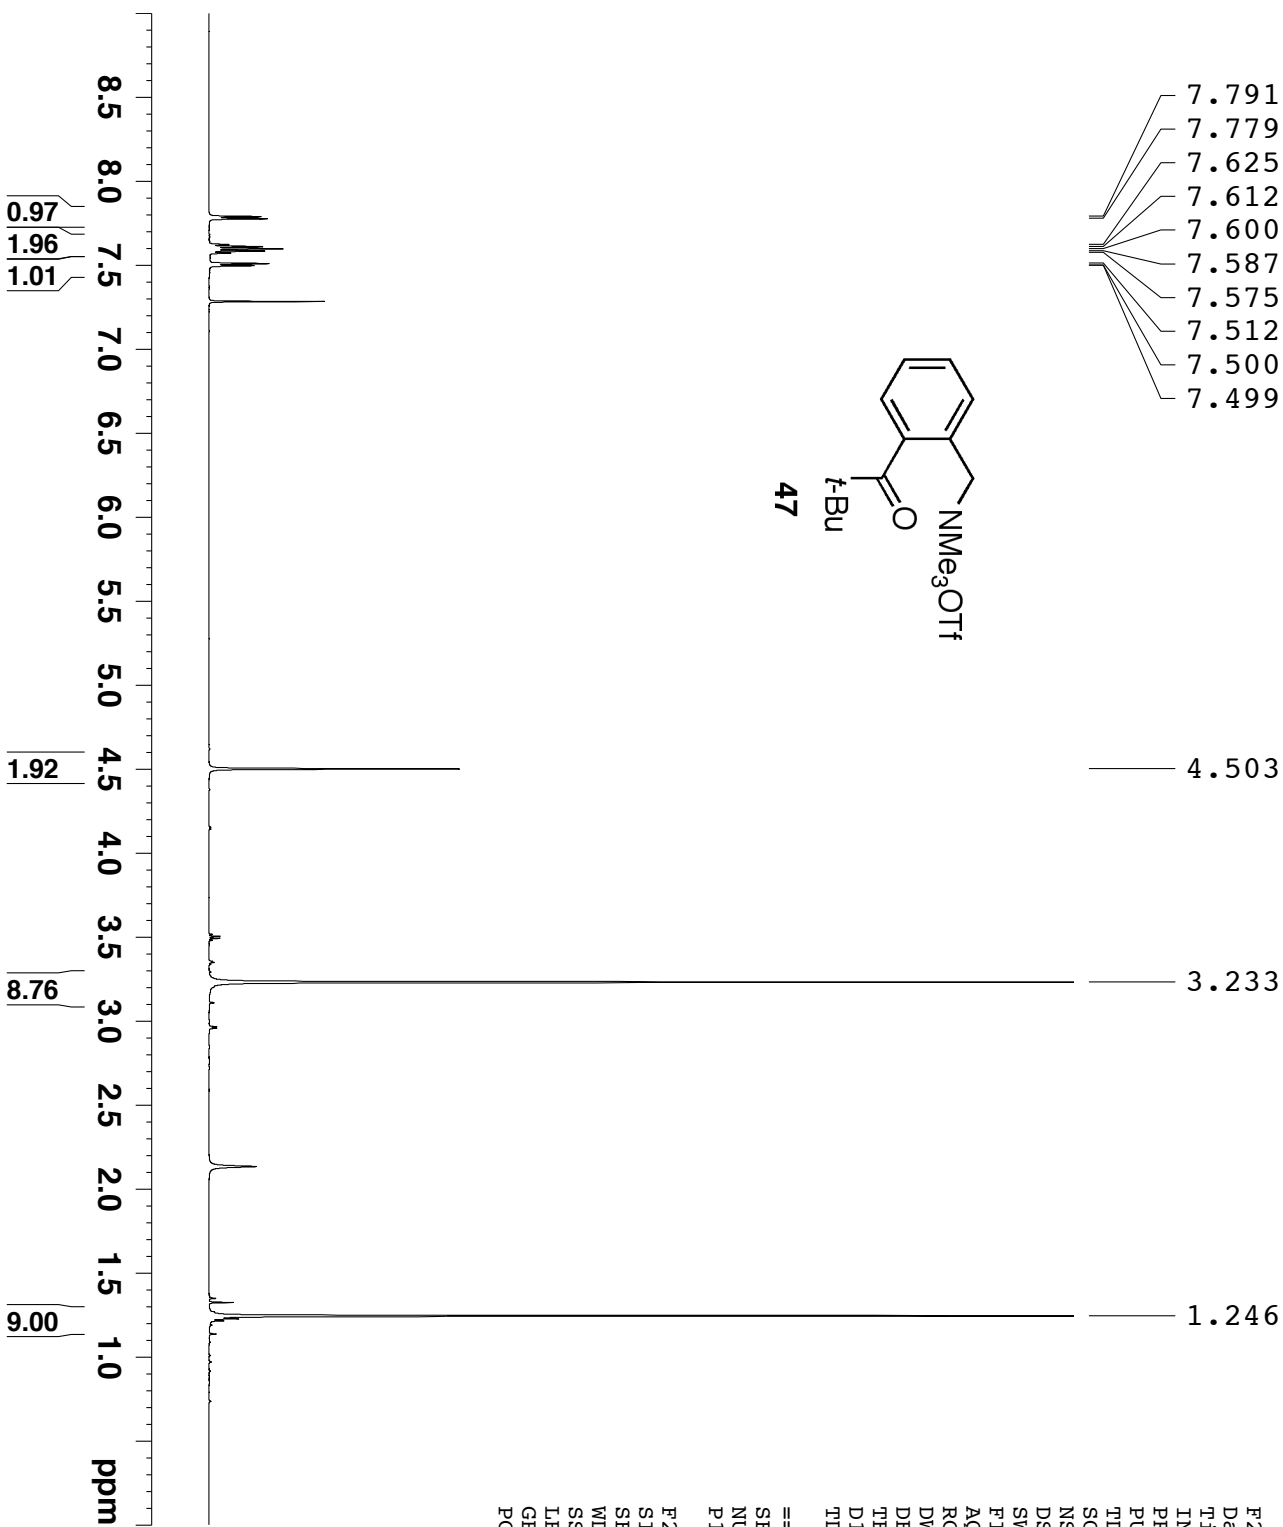

Current Data Parameters  
NAME DM3-CNSI-SAT19  
EXPNO 1  
PROCNO 1

F2 - Acquisition Parameters

Date\_ 20120803  
Time 17.34  
INSTRUM spect  
PROBHD 5 mm PABBO BB/  
PULPROG zg30  
TD 65536  
SOLVENT CDCl3  
NS 8  
DS 2  
SWH 8403.361 Hz  
FIDRES 0.128225 Hz  
AQ 3.8994420 sec  
RG 144  
DW 59.500 usec  
DE 17.39 usec  
TE 300.2 K  
D1 1.00000000 sec  
TD0 1

==== CHANNEL f1 =====

SFO1 600.3233018 MHz  
NUC1 1H  
P1 10.77 usec

F2 - Processing parameters

SI 65536  
SF 600.3200000 MHz  
WDW EM  
SSB 0  
LB 0.30 Hz  
GB 0  
PC 1.00

Compound **47**, <sup>13</sup>C NMR



S150

Current Data Parameters  
 NAME DMM3-CNSI-SALT-09C  
 EXPNO 1  
 PROCNO 1

F2 - Acquisition Parameters  
 Date\_ 20120805  
 Time\_ 3.27

INSTRUM spect  
 PROBHD 5 mm PABBO BB/  
 PULPROG zgpg35  
 TD 65536  
 SOLVENT CDCl3  
 NS 2048  
 DS 4

SWH 34722.223 Hz  
 FIDRES 0.529819 Hz  
 AO 0.9437684 sec  
 RG 2050

DW 14.400 usec  
 DE 19.34 usec  
 TE 300.2 K  
 D1 1.10000002 sec  
 D11 0.03000000 sec  
 TD0 1

==== CHANNEL f1 =====  
 SF01 150.9656784 MHz  
 NUC1 13C  
 P1 10.63 usec

F2 - Processing parameters  
 SI 32768  
 SF 150.9505840 MHz  
 WDW EM  
 SSB 0  
 LB 1.00 Hz  
 GB 0  
 PC 1.40

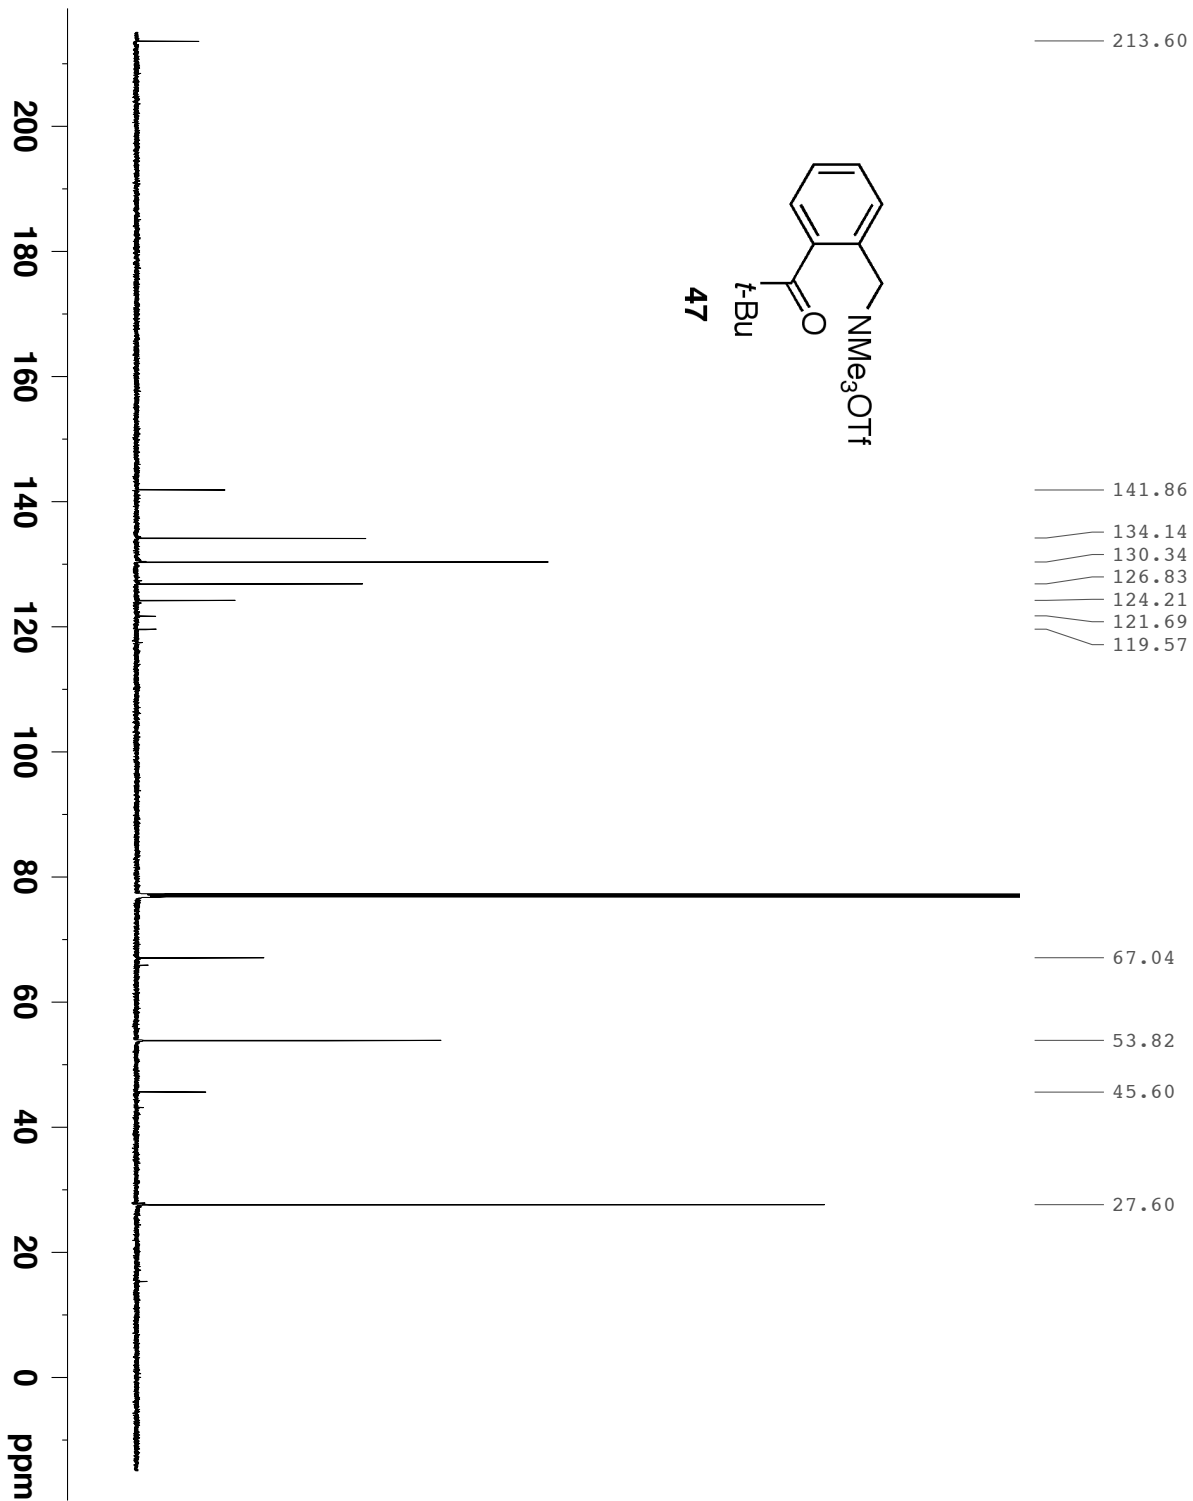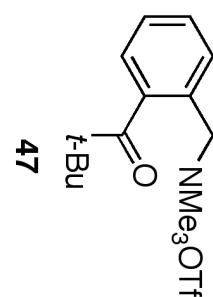

Compound 47, 19F NMR

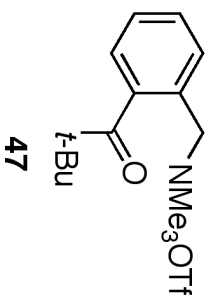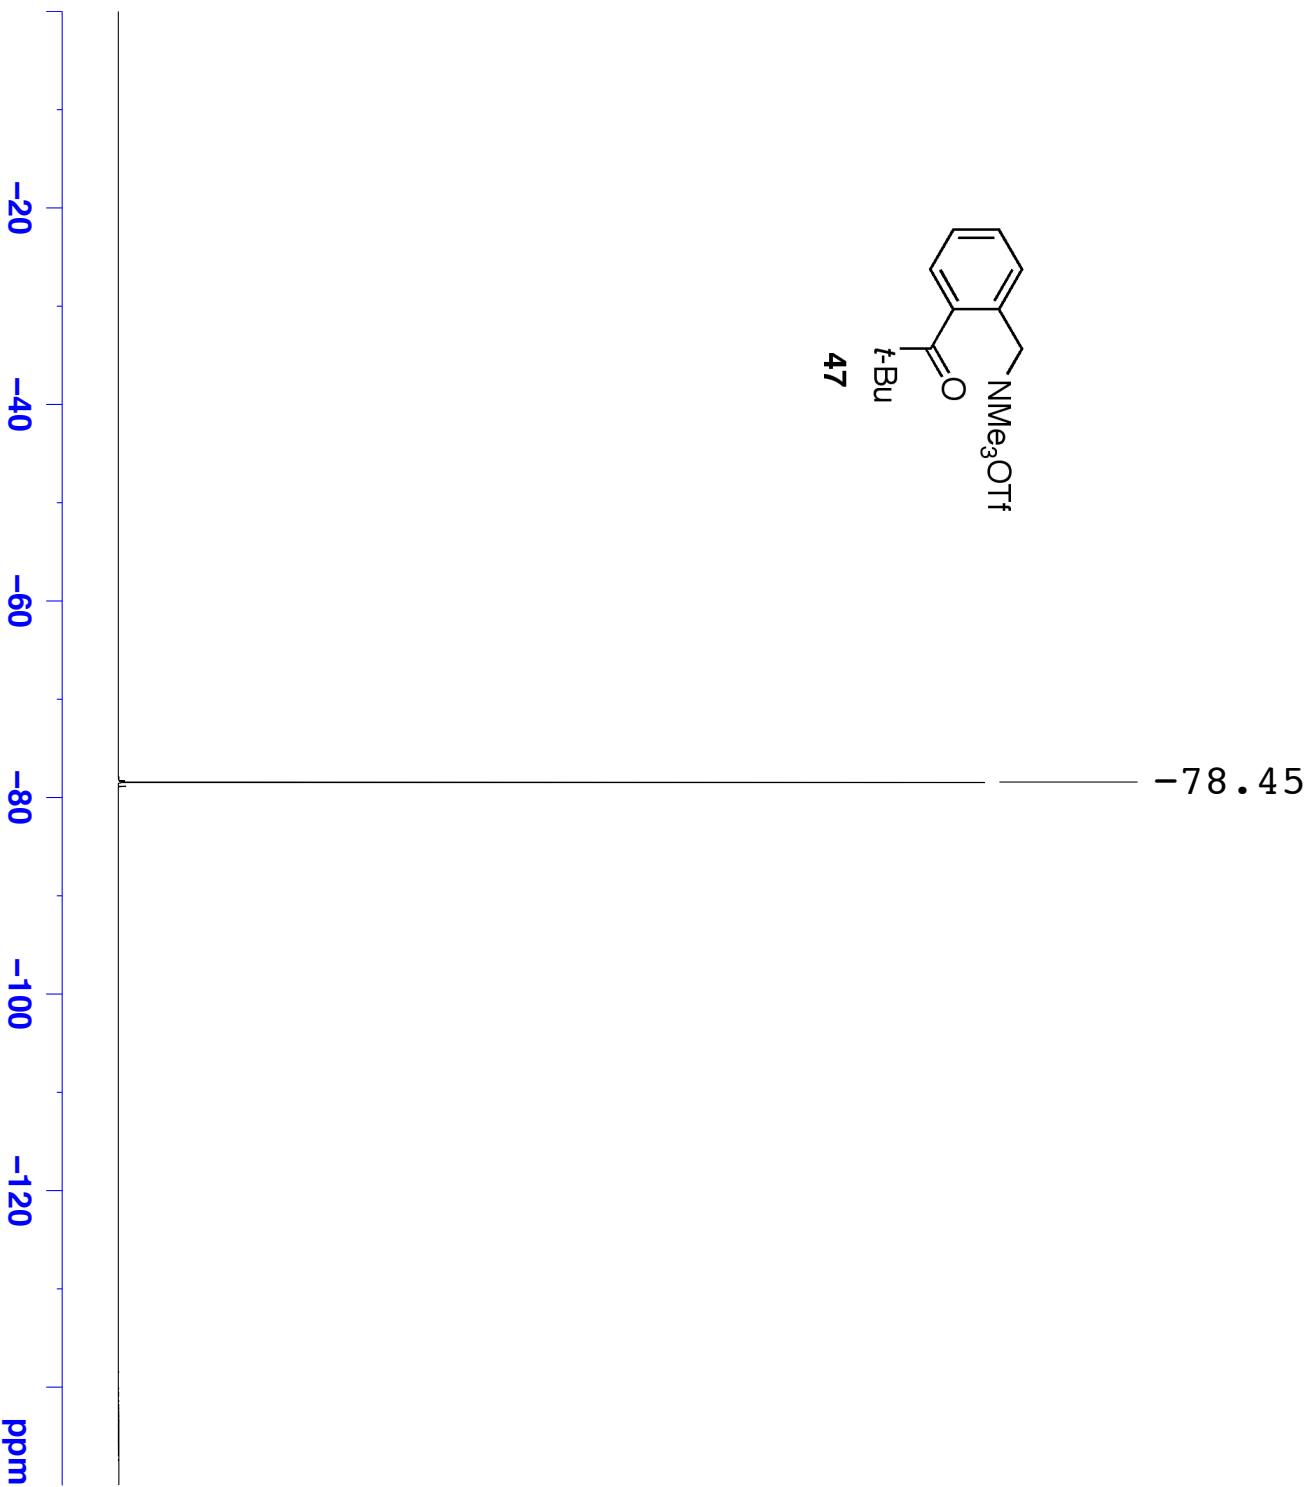

Current Data Parameters  
 NAME DMM3-CNSI-SALT9  
 EXPNO 3  
 PROCNO 1

F2 - Acquisition Parameters

Date\_ 20120803  
 Time 17.47  
 INSTRUM spect  
 PROBHD 5 mm PABBO BB/  
 PULPROG zgfhigqn  
 TD 131072  
 SOLVENT CDC13  
 NS 16  
 DS 4  
 SWH 133928.578 Hz  
 FIDRES 1.021794 Hz  
 AQ 0.4893855 sec  
 RG 362  
 DW 3.733 usec  
 DE 8.00 usec  
 TE 300.2 K  
 D1 3.00000000 sec  
 D11 0.03000000 sec  
 D12 0.00002000 sec  
 TD0 1

==== CHANNEL f1 =====  
 SF01 564.8086803 MHz  
 NUC1 19F  
 P1 11.62 usec

F2 - Processing parameters

SI 65536  
 SF 564.8651670 MHz  
 WDW EM  
 SSB 0  
 LB 2.00 Hz  
 GB 0  
 PC 1.00

Compound **s7** <sup>1</sup>H NMR

- 7.786
- 7.771
- 7.757
- 7.755
- 7.619
- 7.615
- 7.608
- 7.605
- 7.536
- 7.522
- 7.505
- 7.491

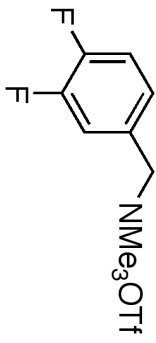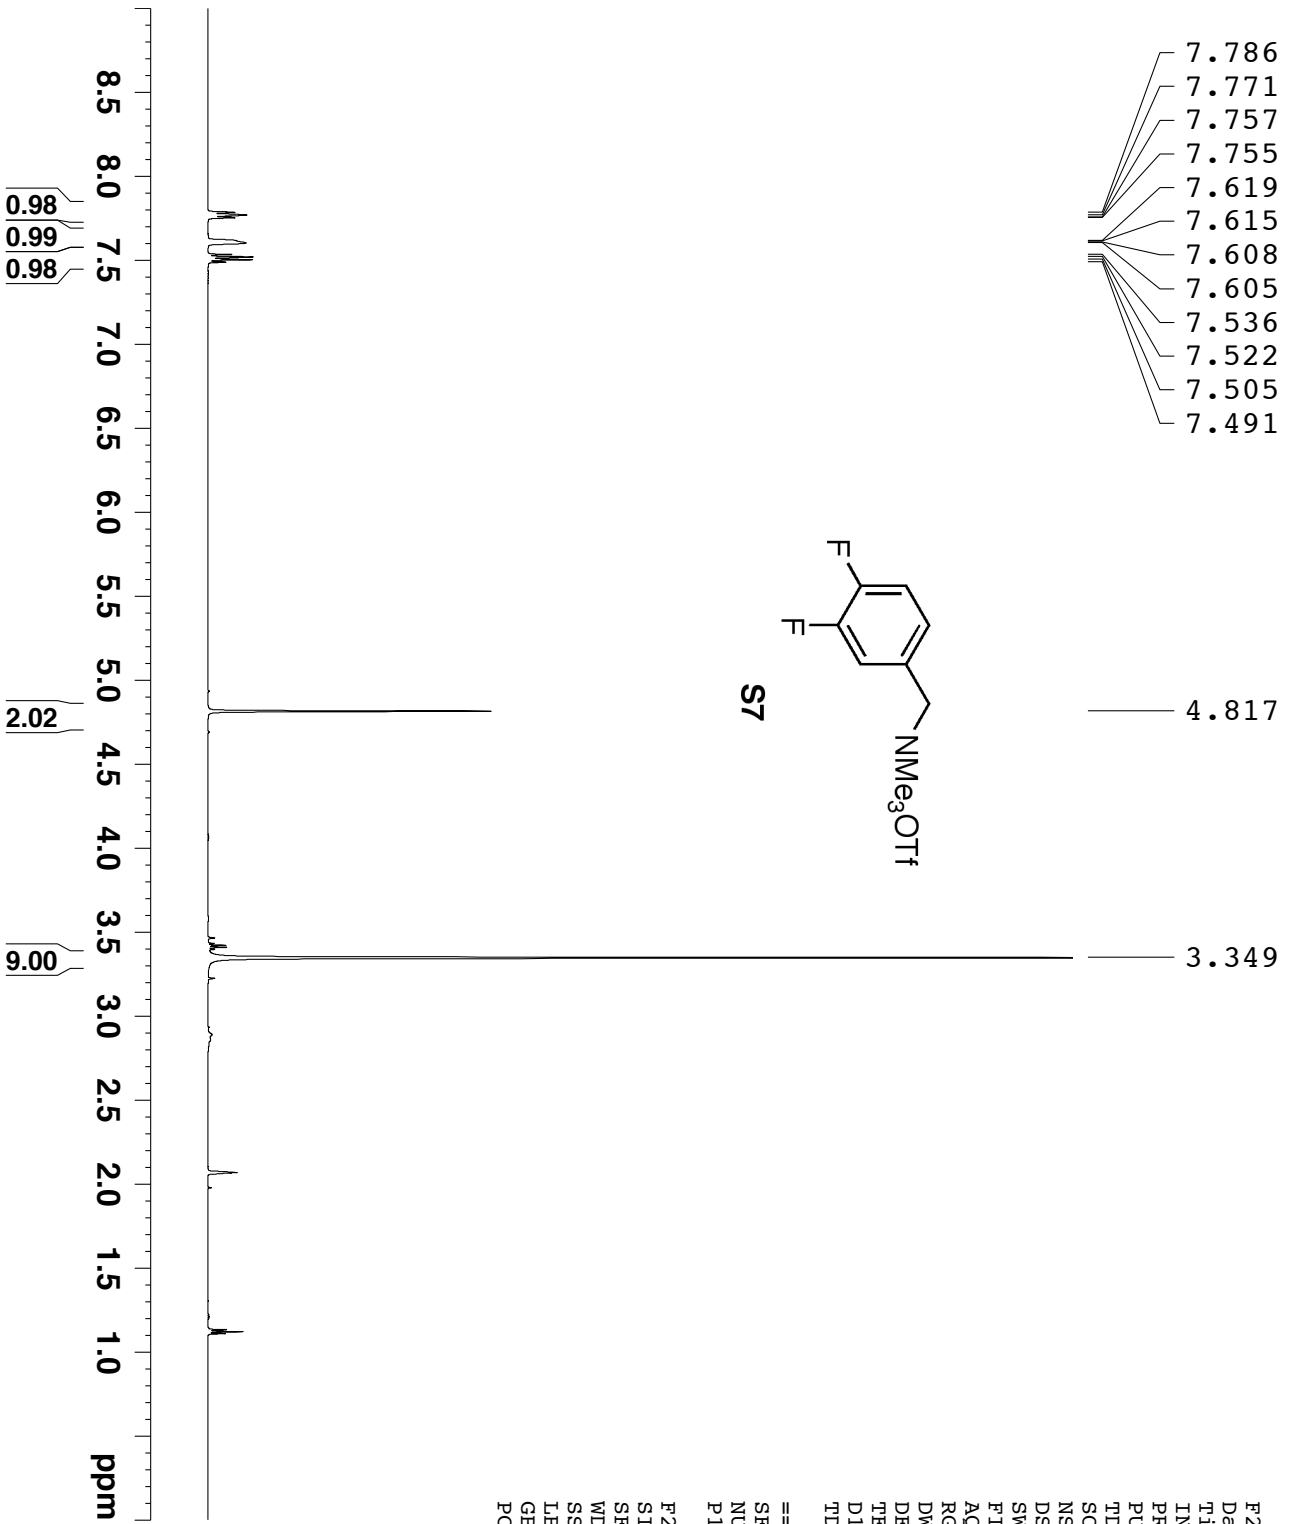

Current Data Parameters  
 NAME DM3-CNSI-SALT10-C2  
 EXPNO 1  
 PROCNO 1

F2 - Acquisition Parameters

Date\_ 20120807  
 Time 10.54  
 INSTRUM spect  
 PROBHD 5 mm PABBO BB/  
 PULPROG zg30  
 TD 65536  
 SOLVENT Acetone  
 NS 8  
 DS 2  
 SWH 8403.361 Hz  
 FIDRES 0.128225 Hz  
 AQ 3.8994420 sec  
 RG 57  
 DW 59.500 usec  
 DE 17.39 usec  
 TE 300.2 K  
 D1 1.00000000 sec  
 TD0 1

==== CHANNEL f1 =====

SFO1 600.3233018 MHz  
 NUC1 1H  
 P1 10.77 usec

F2 - Processing parameters

SI 65536  
 SF 600.3200000 MHz  
 WDW EM  
 SSB 0  
 LB 0.30 Hz  
 GB 0  
 PC 1.00

Compound **S7** <sup>13</sup>CNMR



S153

152.50  
152.42  
150.92  
150.84  
150.76  
149.28  
149.19  
130.50  
130.47  
130.45  
130.43  
125.74  
125.71  
125.68  
124.46  
122.34  
122.27  
122.15  
120.21  
118.16  
118.04

52.23  
52.20  
52.18

29.23  
29.10  
28.97  
28.84  
28.72

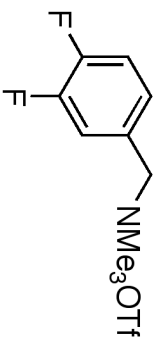

**S7**

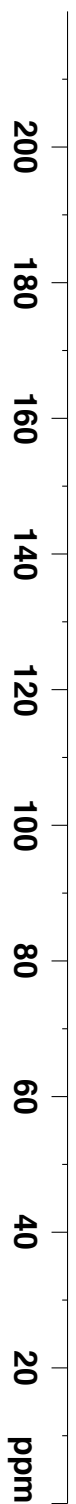

Current Data Parameters  
NAME DMM3-CNSI-SAT110-C2  
EXPNO 3  
PROCNO 1

F2 - Acquisition Parameters

Date\_ 20120808  
Time\_ 3.06  
INSTRUM spect  
PROBHD 5 mm PABBO BB/  
PULPROG zgpg35  
TD 65536  
SOLVENT Acetone  
NS 2048  
DS 4  
SWH 34722.223 Hz  
FIDRES 0.529819 Hz  
AQ 0.9437684 sec  
RG 2050  
DW 14.400 usec  
DE 19.34 usec  
TE 300.2 K  
D1 1.10000002 sec  
D11 0.03000000 sec  
TD0 1

==== CHANNEL f1 =====  
SF01 150.9656784 MHz  
NUC1 13C  
P1 10.63 usec

F2 - Processing parameters  
SI 32768  
SF 150.9505840 MHz  
WDW EM  
SSB 0  
LB 1.00 Hz  
GB 0  
PC 1.40

Compound s7, 19F NMR

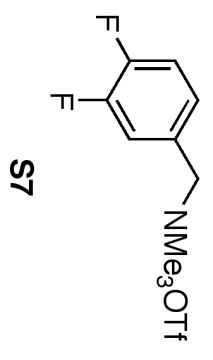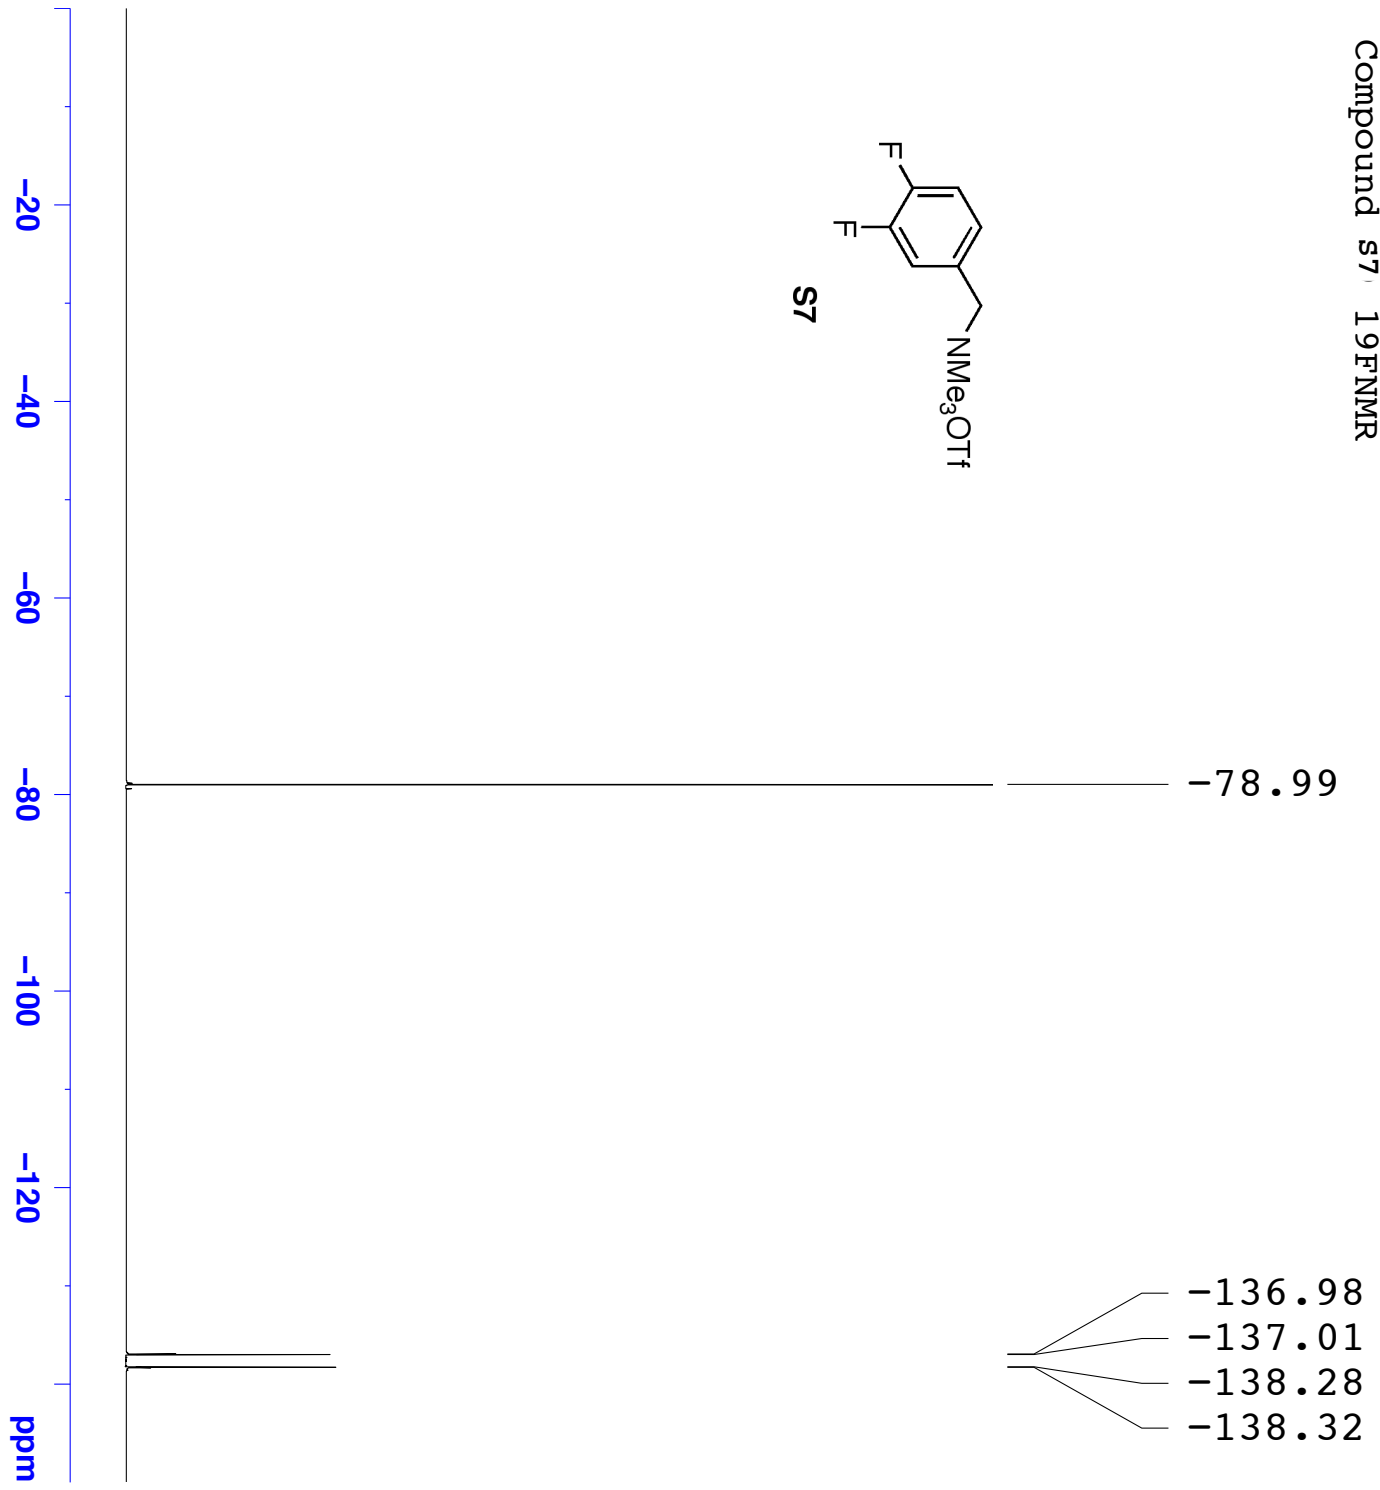

Current Data Parameters  
 NAME DMM3-CNST-SALIT10-C2  
 EXPNO 2  
 PROCNO 1

F2 - Acquisition Parameters  
 Date\_ 20120807  
 Time 10.56  
 INSTRUM spect  
 PROBHD 5 mm PABBO BB/  
 PULPROG zgfg1qgn  
 TD 131072  
 SOLVENT Acetone  
 NS 16  
 DS 4  
 SWH 133928.578 Hz  
 FIDRES 1.021794 Hz  
 AQ 0.4893855 sec  
 RG 256  
 DW 3.733 usec  
 DE 8.00 usec  
 TE 300.2 K  
 D1 3.00000000 sec  
 D11 0.03000000 sec  
 D12 0.00002000 sec  
 TD0 1

==== CHANNEL f1 =====  
 SFO1 564.8086803 MHz  
 NUC1 19F  
 P1 11.62 usec

F2 - Processing parameters  
 SI 65536  
 SF 564.8651670 MHz  
 WDW EM  
 SSB 0  
 LB 2.00 Hz  
 GB 0  
 PC 1.00

Compound **s8** <sup>1</sup>H NMR

7.913  
7.900  
7.887  
7.873  
7.853  
7.839  
7.601  
7.590  
7.576  
7.560  
7.557  
7.541

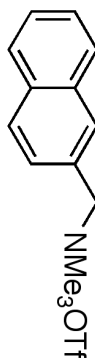

4.814

3.251

Current Data Parameters  
NAME DMM3-CNSI-SAT111  
EXPNO 1  
PROCNO 1

F2 - Acquisition Parameters  
Date\_ 20120803  
Time 18.07  
INSTRUM spect  
PROBHD 5 mm PABBO BB/  
PULPROG zg30  
TD 65536  
SOLVENT CDCl3  
NS 8  
DS 2  
SWH 8403.361 Hz  
FIDRES 0.128225 Hz  
AQ 3.8994420 sec  
RG 256  
DW 59.500 usec  
DE 17.39 usec  
TE 300.2 K  
D1 1.00000000 sec  
TD0 1

==== CHANNEL f1 =====  
SF01 600.3233018 MHz  
NUC1 1H  
P1 10.77 usec

F2 - Processing parameters  
SI 65536  
SF 600.3200000 MHz  
WDW EM  
SSB 0  
LB 0.30 Hz  
GB 0  
PC 1.00

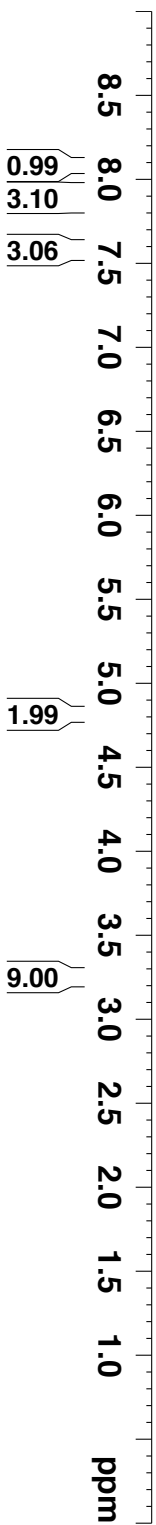



133.84  
133.54  
132.83  
129.15  
128.61  
128.47  
127.87  
127.67  
127.09  
124.41  
123.93  
121.81  
119.69  
117.57

69.58

52.54  
52.52  
52.49

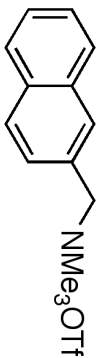

Current Data Parameters  
NAME DM3-CNSI-SALT11-C2  
EXPNO 1  
PROCNO 1

F2 - Acquisition Parameters  
Date\_ 20120808  
Time\_ 4.21

INSTRUM spect  
PROBHD 5 mm PABBO BB/  
PULPROG zgpg55  
TD 65536  
SOLVENT CDCl3  
NS 2048  
DS 4

SWH 34722.223 Hz  
FIDRES 0.529819 Hz  
AQ 0.9437684 sec  
RG 2050  
DW 14.400 usec  
DE 19.34 usec  
TE 300.2 K  
D1 1.1000002 sec  
D11 0.0300000 sec  
TD0 1

==== CHANNEL f1 =====  
SFO1 150.9656784 MHz  
NUC1 13C  
P1 10.63 usec

F2 - Processing parameters  
SI 32768  
SF 150.9505840 MHz  
WDW EM  
SSB 0  
LB 1.00 Hz  
GB 0  
PC 1.40

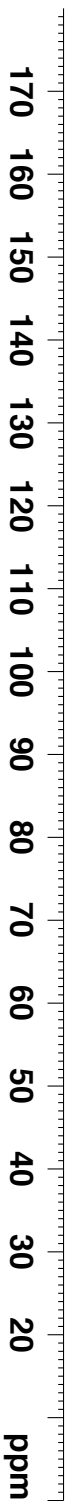



Compound **S8** 19F NMR

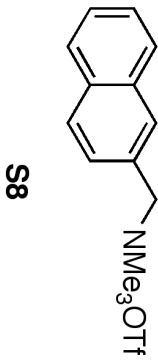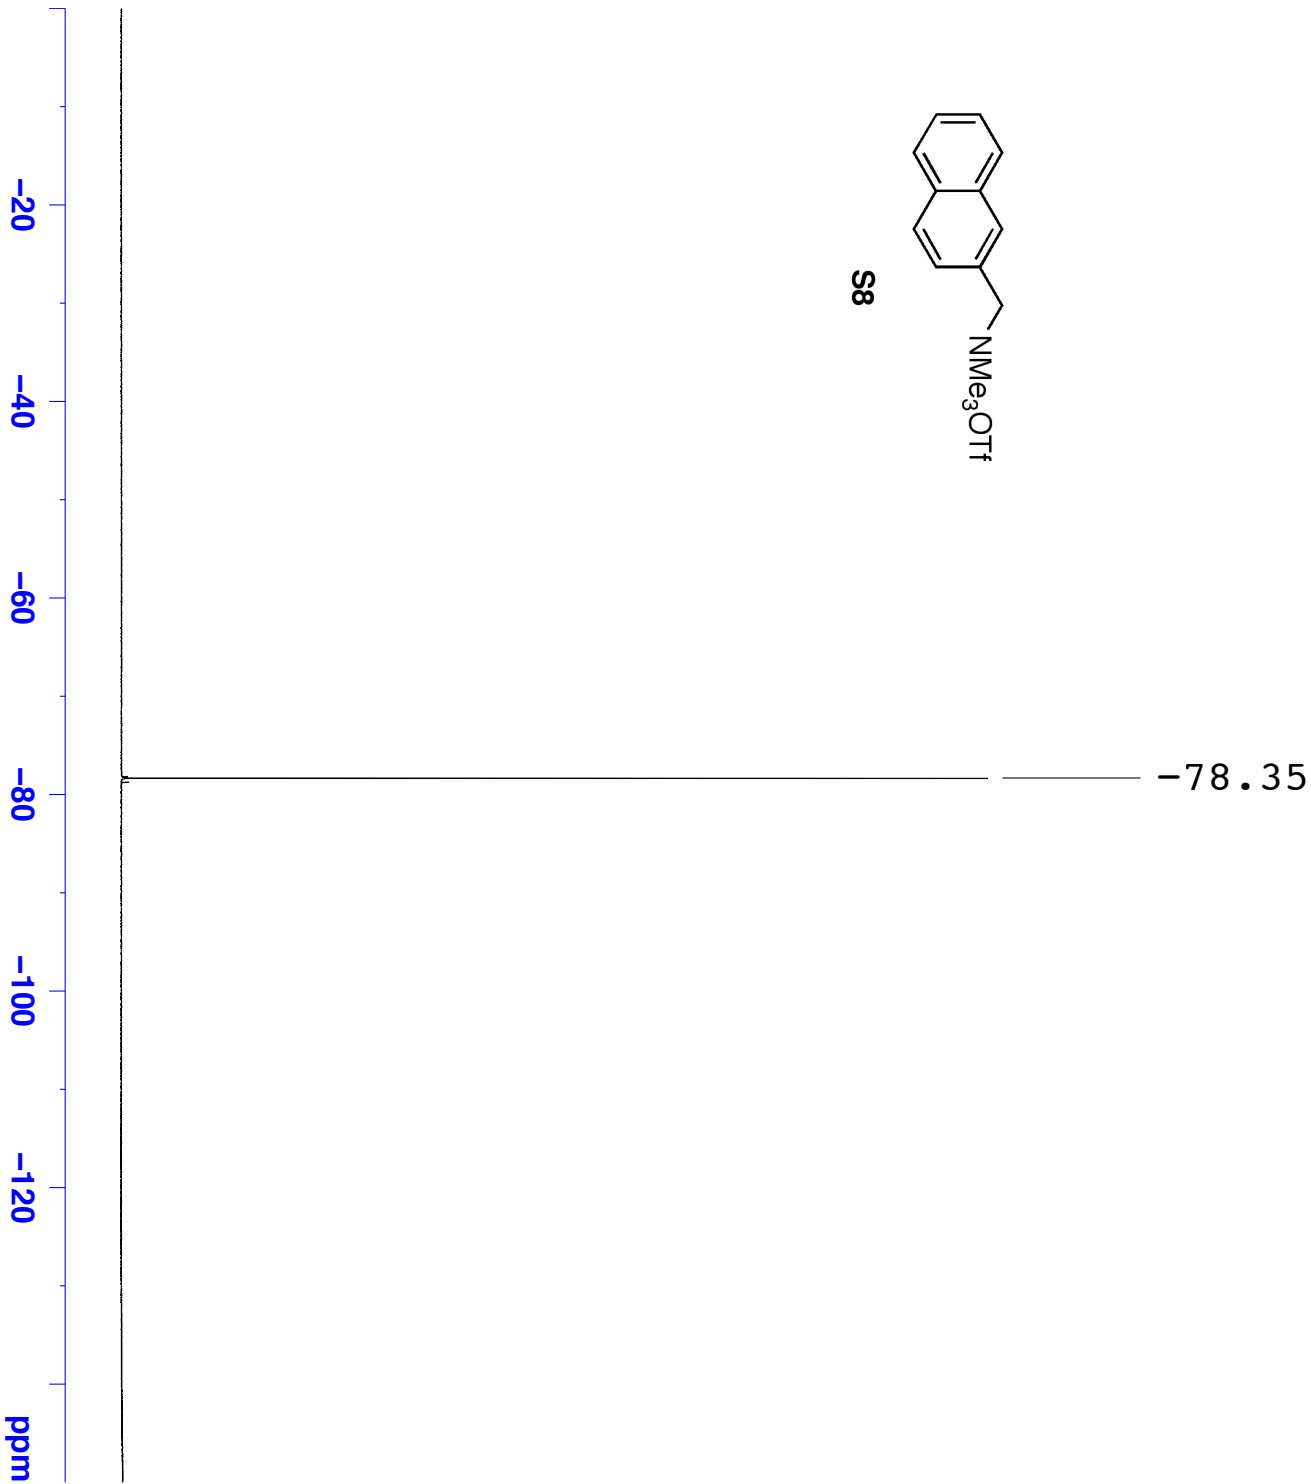

Current Data Parameters  
 NAME DM3-CNST-SALT11  
 EXPNO 3  
 PROCNO 1

F2 - Acquisition Parameters  
 Date\_ 20120803  
 Time 18.20

INSTRUM spect  
 PROBHD 5 mm PABBO BB/  
 PULPROG zgfg1gqn  
 TD 131072  
 SOLVENT CDCl3  
 NS 16  
 DS 4

SWH 133928.578 Hz  
 FIDRES 1.021794 Hz  
 AQ 0.4893855 sec

RG 406  
 DE 3.733 usec  
 TE 300.2 K  
 D1 3.00000000 sec  
 D11 0.03000000 sec  
 D12 0.00002000 sec  
 TD0 1

==== CHANNEL f1 =====  
 SFO1 564.8086803 MHz  
 NUC1 19F  
 P1 11.62 usec

F2 - Processing parameters  
 SI 65536  
 SF 564.8651670 MHz  
 WDW EM  
 SSB 0  
 LB 2.00 Hz  
 GB 0  
 PC 1.00

Compound **S9** <sup>1</sup>H NMR

7.694  
7.681  
7.528  
7.348  
7.334  
7.310  
7.298  
7.286  
7.251  
7.238  
7.226

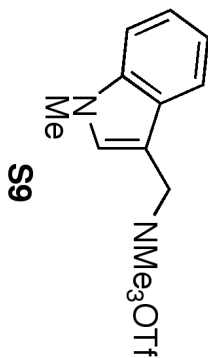

4.766  
3.772  
3.170

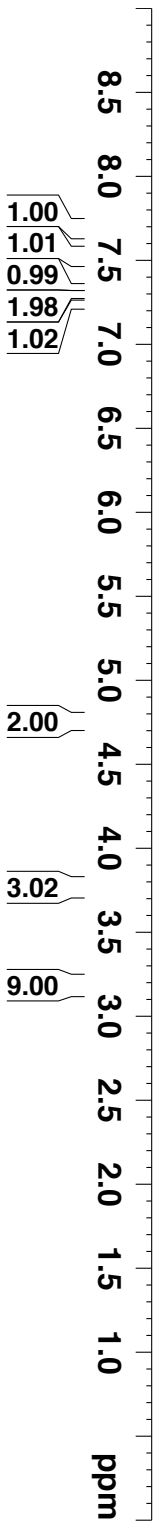

Current Data Parameters  
NAME DMM3-CNSI-SALT12  
EXPNO 1  
PROCNO 1

F2 - Acquisition Parameters

Date\_ 20120803  
Time 18.23  
INSTRUM spect  
PROBHD 5 mm PABBO BB/  
PULPROG zg30  
TD 65536  
SOLVENT CDC13  
NS 8  
DS 2  
SWH 8403.361 Hz  
FIDRES 0.128225 Hz  
AQ 3.8994420 sec  
RG 203  
DW 59.500 usec  
DE 17.39 usec  
TE 300.2 K  
D1 1.00000000 sec  
TD0 1

==== CHANNEL f1 =====

SFO1 600.3233018 MHz  
NUC1 1H  
P1 10.77 usec

F2 - Processing parameters

SI 65536  
SF 600.3200000 MHz  
WDW EM  
SSB 0  
LB 0.30 Hz  
GB 0  
PC 1.00

Compound S9 13CNMR

|        |
|--------|
| 136.93 |
| 134.08 |
| 127.86 |
| 123.99 |
| 122.59 |
| 121.87 |
| 121.09 |
| 119.75 |
| 118.61 |
| 117.63 |
| 110.05 |
| 100.51 |
| 61.80  |
| 51.85  |
| 33.00  |

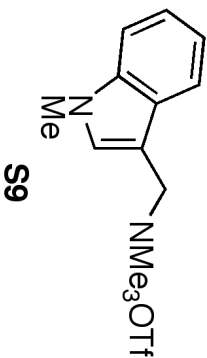

S159

Current Data Parameters  
 NAME DM3-CNSI-SALT12-C2  
 EXPNO 1  
 PROCNO 1

F2 - Acquisition Parameters

Date\_ 20120808  
 Time 5.36  
 INSTRUM spect  
 PROBHD 5 mm PABBO BB/  
 PULPROG zgpg55  
 TD 65536  
 SOLVENT CDCl3  
 NS 2048  
 DS 4  
 SWH 34722.223 Hz  
 FIDRES 0.529819 Hz  
 AQ 0.9437684 sec  
 RG 2050  
 DW 14.400 usec  
 DE 19.34 usec  
 TE 300.2 K  
 D1 1.10000002 sec  
 D11 0.03000000 sec  
 TD0 1

==== CHANNEL f1 =====  
 SFO1 150.9656784 MHz  
 NUC1 13C  
 P1 10.63 usec

F2 - Processing parameters  
 SI 32768  
 SF 150.9505840 MHz  
 WDW EM  
 SSB 0  
 LB 1.00 Hz  
 GB 0  
 PC 1.40



Compound S9 19FNMR

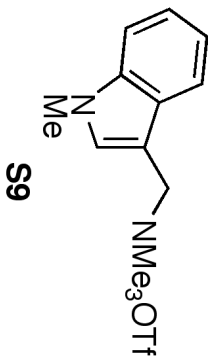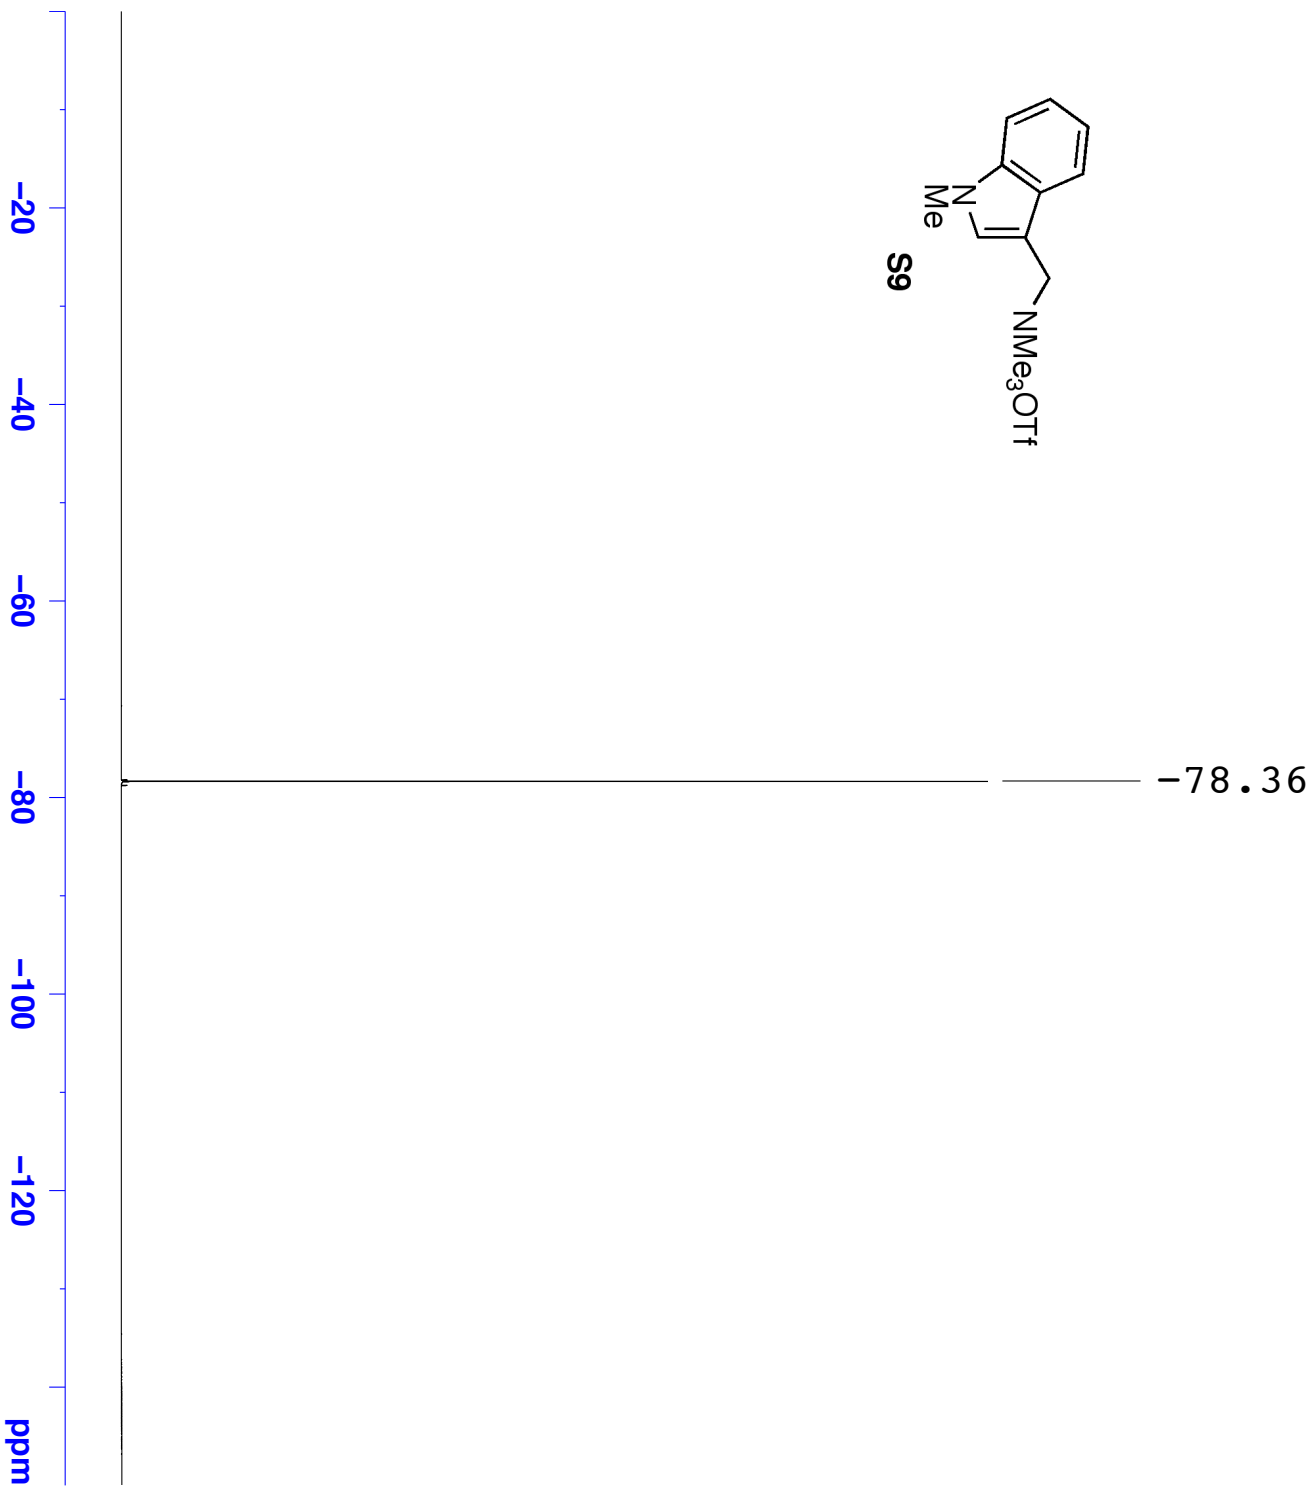

Current Data Parameters  
 NAME DM3-CNST-SALT12  
 EXPNO 3  
 PROCNO 1

F2 - Acquisition Parameters  
 Date\_ 20120803  
 Time 18.36

INSTRUM spect  
 PROBHD 5 mm PABBO BB/  
 PULPROG zgpg30  
 TD 131072  
 SOLVENT CDCl3  
 NS 16  
 DS 4

SWH 133928.578 Hz  
 FIDRES 1.021794 Hz  
 AQ 0.4893855 sec

RG 406  
 DE 3.733 usec  
 TE 300.2 K  
 D1 3.00000000 sec  
 D11 0.03000000 sec  
 D12 0.00002000 sec  
 TD0 1

==== CHANNEL f1 =====  
 SFO1 564.8086803 MHz  
 NUC1 19F  
 P1 11.62 usec

F2 - Processing parameters  
 SI 65536  
 SF 564.8651670 MHz  
 WDW EM  
 SSB 0  
 LB 2.00 Hz  
 GB 0  
 PC 1.00

Compound 33 1HNMR

8.073  
7.963  
7.902  
7.889  
7.626  
7.614  
7.602  
7.590  
7.574  
7.559

5.097  
5.086  
5.074  
5.063

3.226

1.952  
1.940

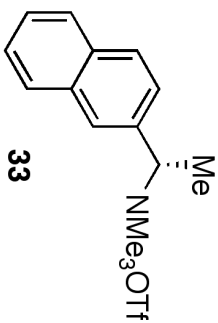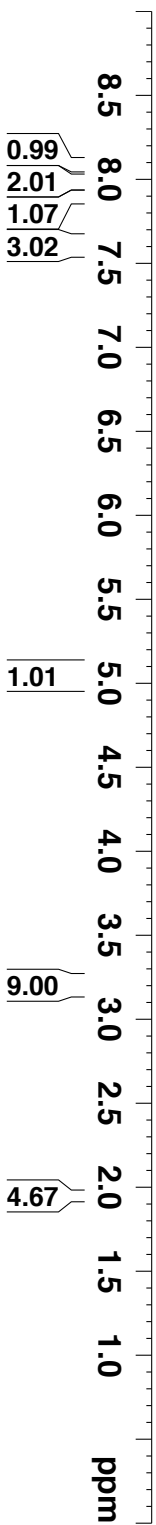

Current Data Parameters  
NAME DMM3-CNSI-SAT113  
EXPNO 1  
PROCNO 1

F2 - Acquisition Parameters

Date\_ 20120803  
Time 18.40  
INSTRUM spect  
PROBHD 5 mm PABBO BB/  
PULPROG zg30  
TD 65536  
SOLVENT CDCl3  
NS 8  
DS 2  
SWH 8403.361 Hz  
FIDRES 0.128225 Hz  
AQ 3.8994420 sec  
RG 203  
DW 59.500 usec  
DE 17.39 usec  
TE 300.2 K  
D1 1.00000000 sec  
TD0 1

==== CHANNEL f1 =====

SFO1 600.3233018 MHz  
NUC1 1H  
P1 10.77 usec

F2 - Processing parameters

SI 65536  
SF 600.3200000 MHz  
WDW EM  
SSB 0  
LB 0.30 Hz  
GB 0  
PC 1.00

Compound 33 13CNMR

- 133.93
- 132.83
- 129.63
- 129.25
- 128.60
- 127.88
- 127.67
- 127.23
- 123.98
- 121.86
- 119.74
- 117.62

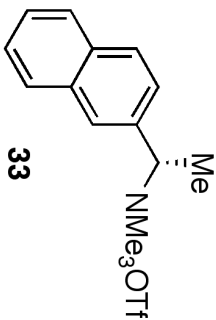

74.21

- 51.16
- 51.14
- 51.11

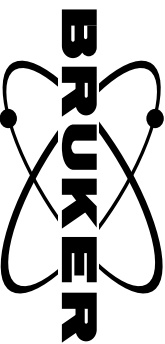

S162

Current Data Parameters  
 NAME DM3-CNSI-SALT13-C2  
 EXPNO 1  
 PROCNO 1

F2 - Acquisition Parameters  
 Date\_ 20120808  
 Time 6.55  
 INSTRUM spect  
 PROBHD 5 mm PABBO BB/  
 PULPROG zgpg55  
 TD 65536  
 SOLVENT CDCl3  
 NS 2048  
 DS 4  
 SWH 34722.223 Hz  
 FIDRES 0.529819 Hz  
 AQ 0.9437684 sec  
 RG 2050  
 DW 14.400 usec  
 DE 19.34 usec  
 TE 300.2 K  
 D1 1.1000002 sec  
 D11 0.0300000 sec  
 TD0 1

==== CHANNEL f1 =====  
 SFO1 150.9656784 MHz  
 NUC1 13C  
 P1 10.63 usec

F2 - Processing parameters  
 SI 32768  
 SF 150.9505840 MHz  
 WDW EM  
 SSB 0  
 LB 1.00 Hz  
 GB 0  
 PC 1.40

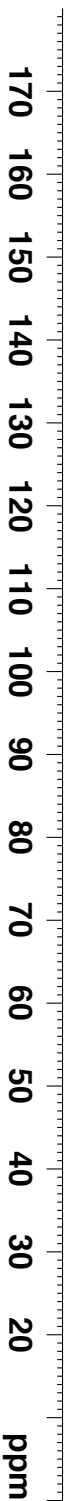

Compound 33 19F NMR

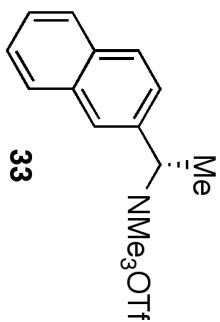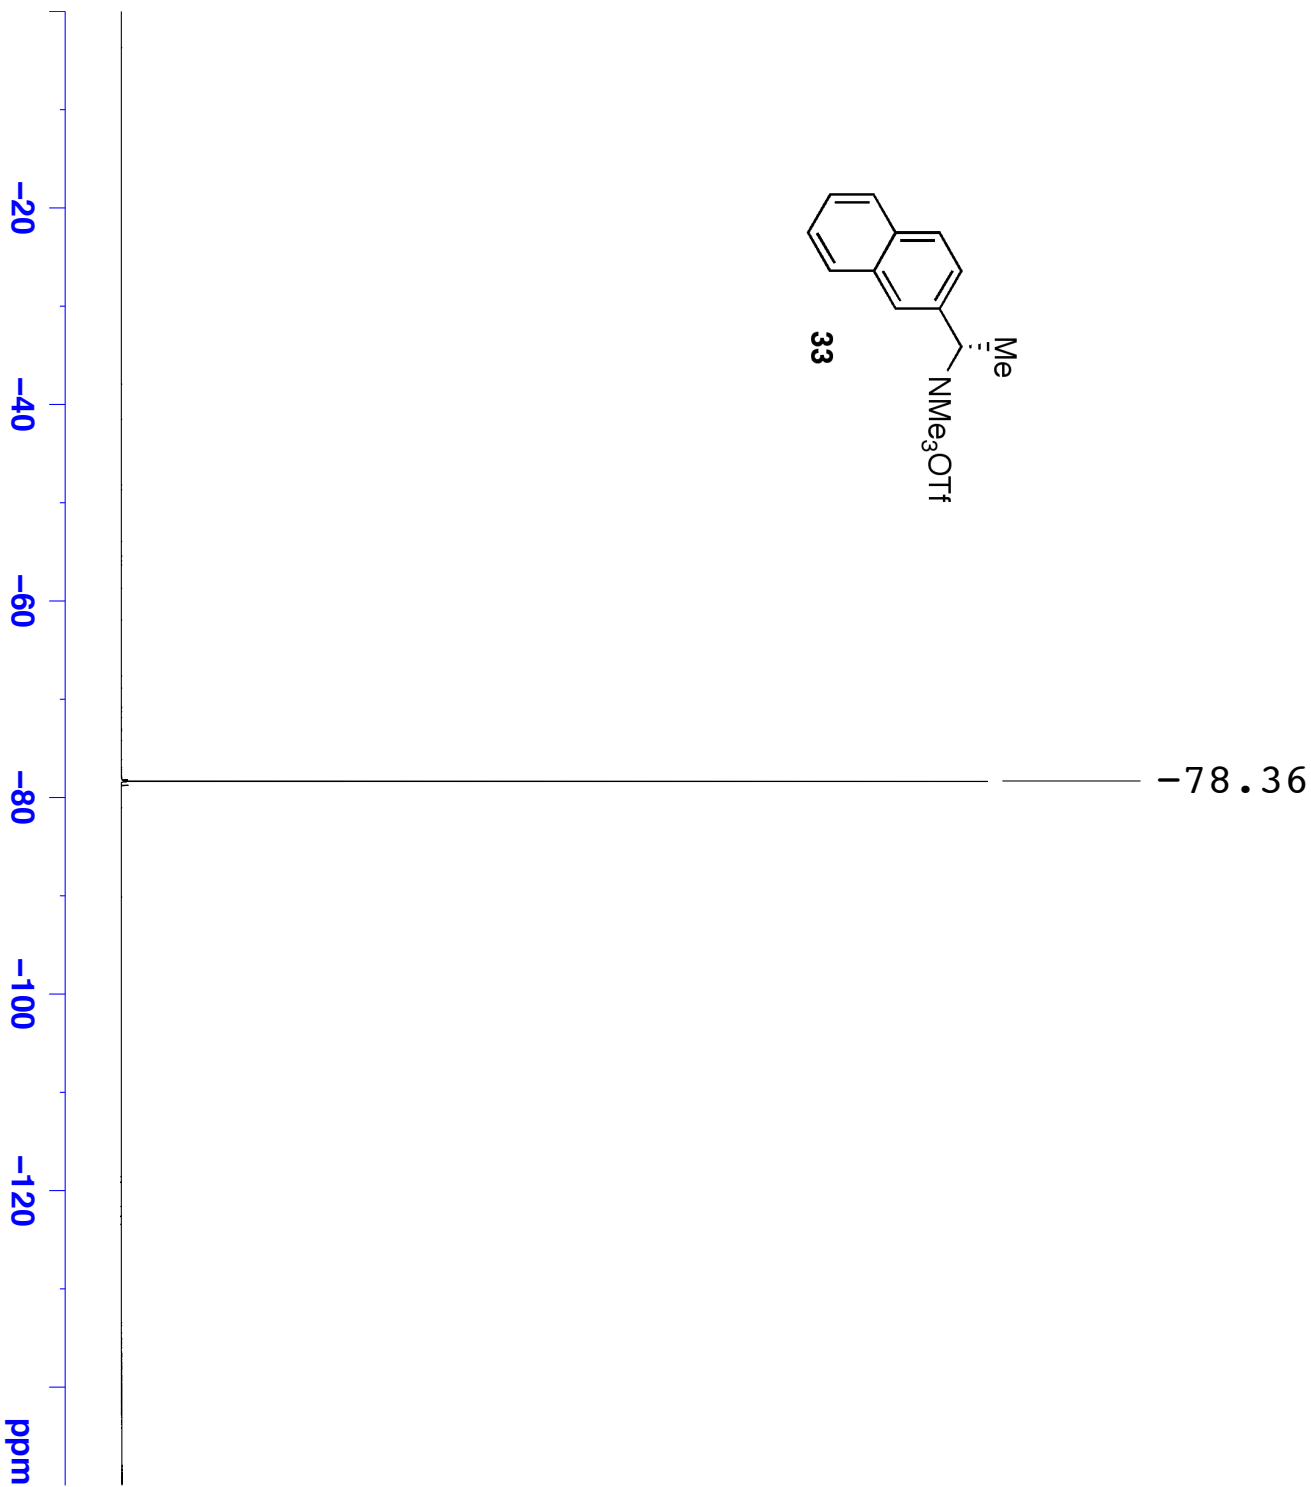

Current Data Parameters  
 NAME DM3-CNSI-SALT13  
 EXPNO 3  
 PROCNO 1

F2 - Acquisition Parameters  
 Date\_ 20120803  
 Time 18.53

INSTRUM spect  
 PROBHD 5 mm PABBO BB/  
 PULPROG zgfhigqn  
 TD 131072  
 SOLVENT CDC13  
 NS 16  
 DS 4

SWH 133928.578 Hz  
 FIDRES 1.021794 Hz  
 AQ 0.4893855 sec

RG 362  
 DW 3.733 usec  
 DE 8.00 usec  
 TE 300.2 K  
 D1 3.00000000 sec  
 D11 0.03000000 sec  
 D12 0.00002000 sec  
 TD0 1

==== CHANNEL f1 =====  
 SF01 564.8086803 MHz  
 NUC1 19F  
 P1 11.62 usec

F2 - Processing parameters  
 SI 65536  
 SF 564.8651670 MHz  
 WDW EM  
 SSB 0  
 LB 2.00 Hz  
 GB 0  
 PC 1.00

Compound S10 1HNMR

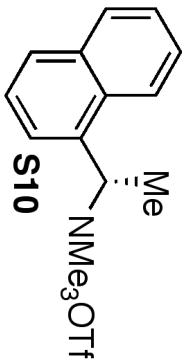

8.445  
8.011  
7.997  
7.937  
7.923  
7.739  
7.728  
7.716  
7.609  
7.596  
7.581  
7.567  
5.839  
5.828  
5.816  
5.805

3.199  
1.972  
1.960

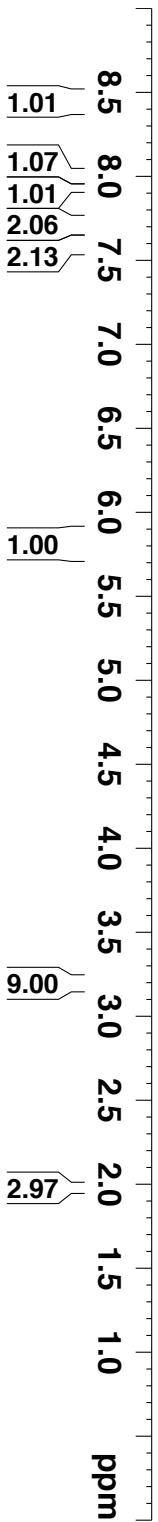

Current Data Parameters  
NAME DM3-CNSI-SALT14  
EXPNO 1  
PROCNO 1

F2 - Acquisition Parameters

Date\_ 20120803  
Time 18.56  
INSTRUM spect  
PROBHD 5 mm PABBO BB/  
PULPROG zg30  
TD 65536  
SOLVENT CDCl3  
NS 8  
DS 2  
SWH 8403.361 Hz  
FIDRES 0.128225 Hz  
AQ 3.8994420 sec  
RG 181  
DW 59.500 usec  
DE 17.39 usec  
TE 300.2 K  
D1 1.00000000 sec  
TD0 1

==== CHANNEL f1 =====

SFO1 600.3233018 MHz  
NUC1 1H  
P1 10.77 usec

F2 - Processing parameters

SI 65536  
SF 600.320000 MHz  
WDW EM  
SSB 0  
LB 0.30 Hz  
GB 0  
PC 1.00



Compound S10 13CNMR

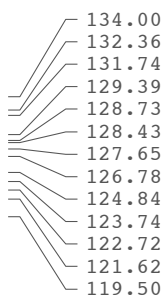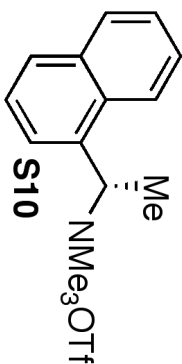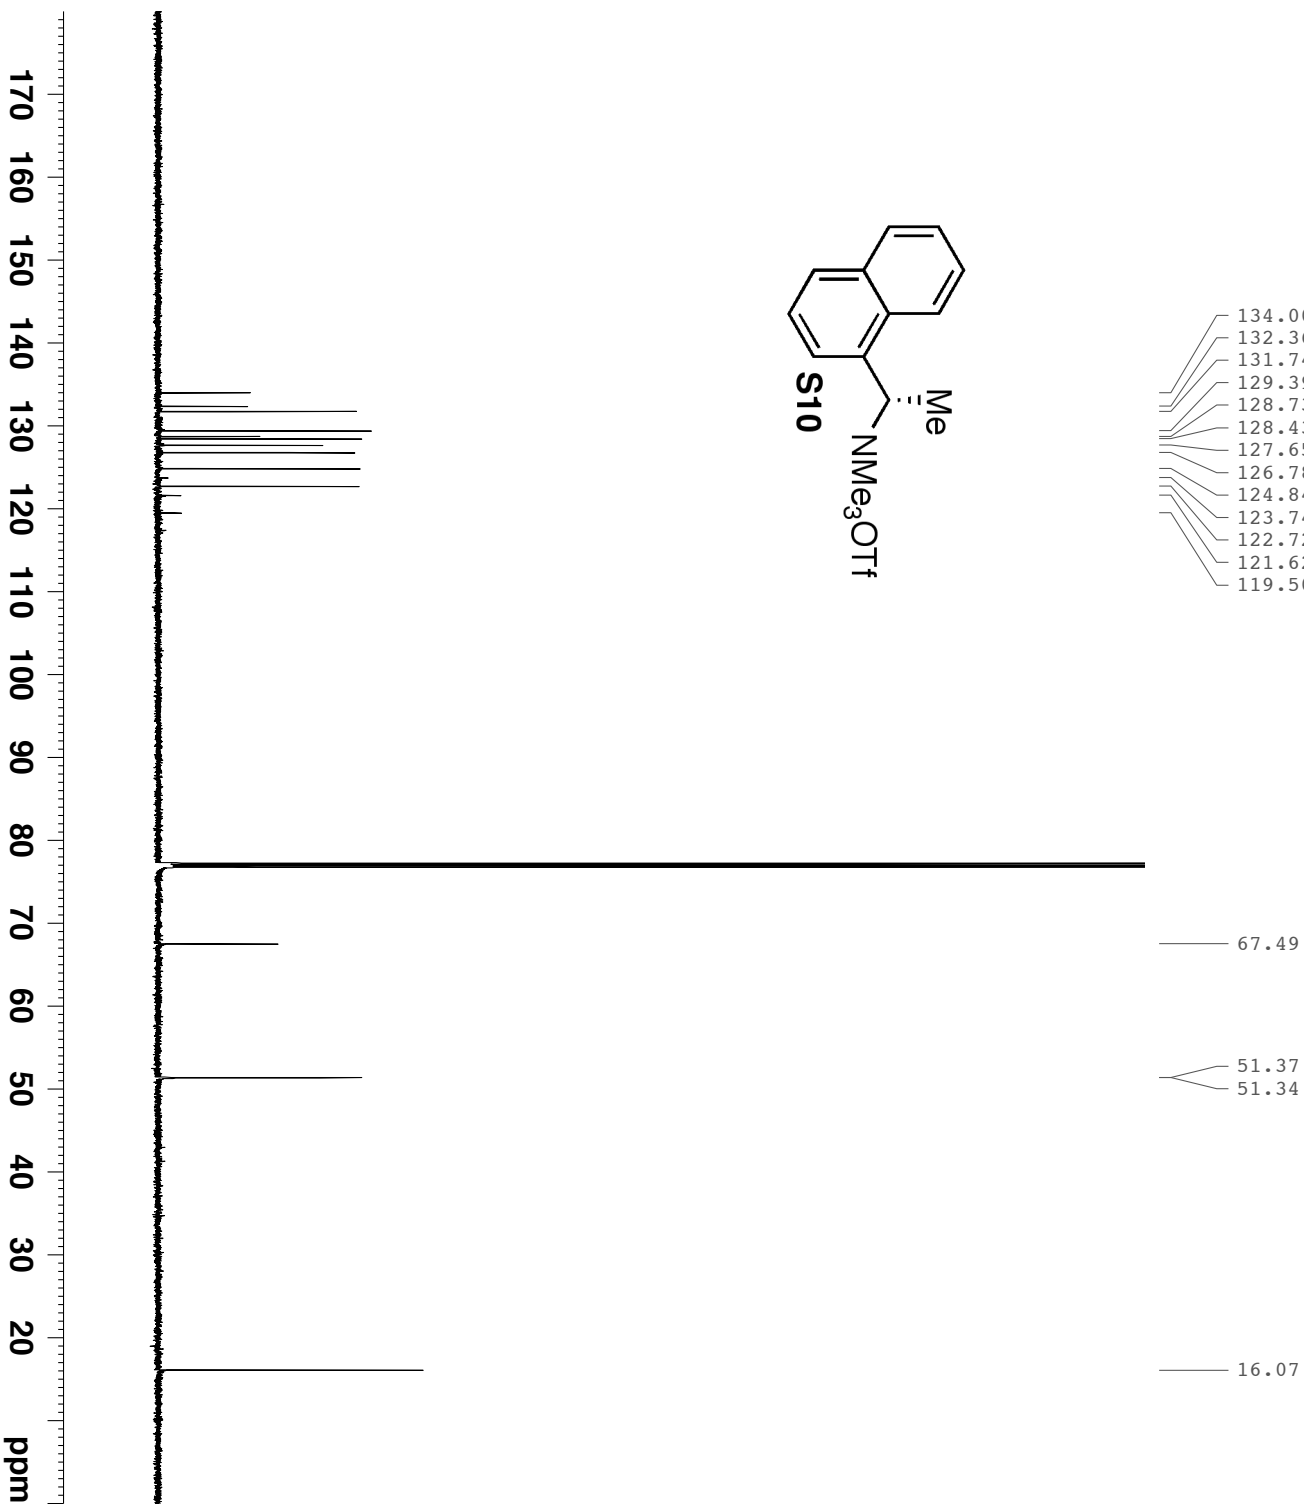

S165

Current Data Parameters  
 NAME DM3-CNSI-SALT-14C  
 EXPNO 1  
 PROCNO 1

F2 - Acquisition Parameters  
 Date\_ 20120805  
 Time\_ 8.27  
 INSTRUM spect  
 PROBHD 5 mm PABBO BB/  
 PULPROG zgpg55  
 TD 65536  
 SOLVENT CDCl3  
 NS 2048  
 DS 4  
 SWH 34722.223 Hz  
 FIDRES 0.529819 Hz  
 AQ 0.9437684 sec  
 RG 2050  
 DW 14.400 usec  
 DE 19.34 usec  
 TE 300.2 K  
 D1 1.1000002 sec  
 D11 0.0300000 sec  
 TD0 1

==== CHANNEL f1 =====  
 SFO1 150.9656784 MHz  
 NUC1 13C  
 P1 10.63 usec

F2 - Processing parameters  
 SI 32768  
 SF 150.9505840 MHz  
 WDW EM  
 SSB 0  
 LB 1.00 Hz  
 GB 0  
 PC 1.40

Compound S10 19F NMR

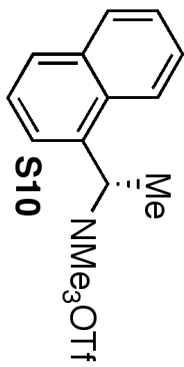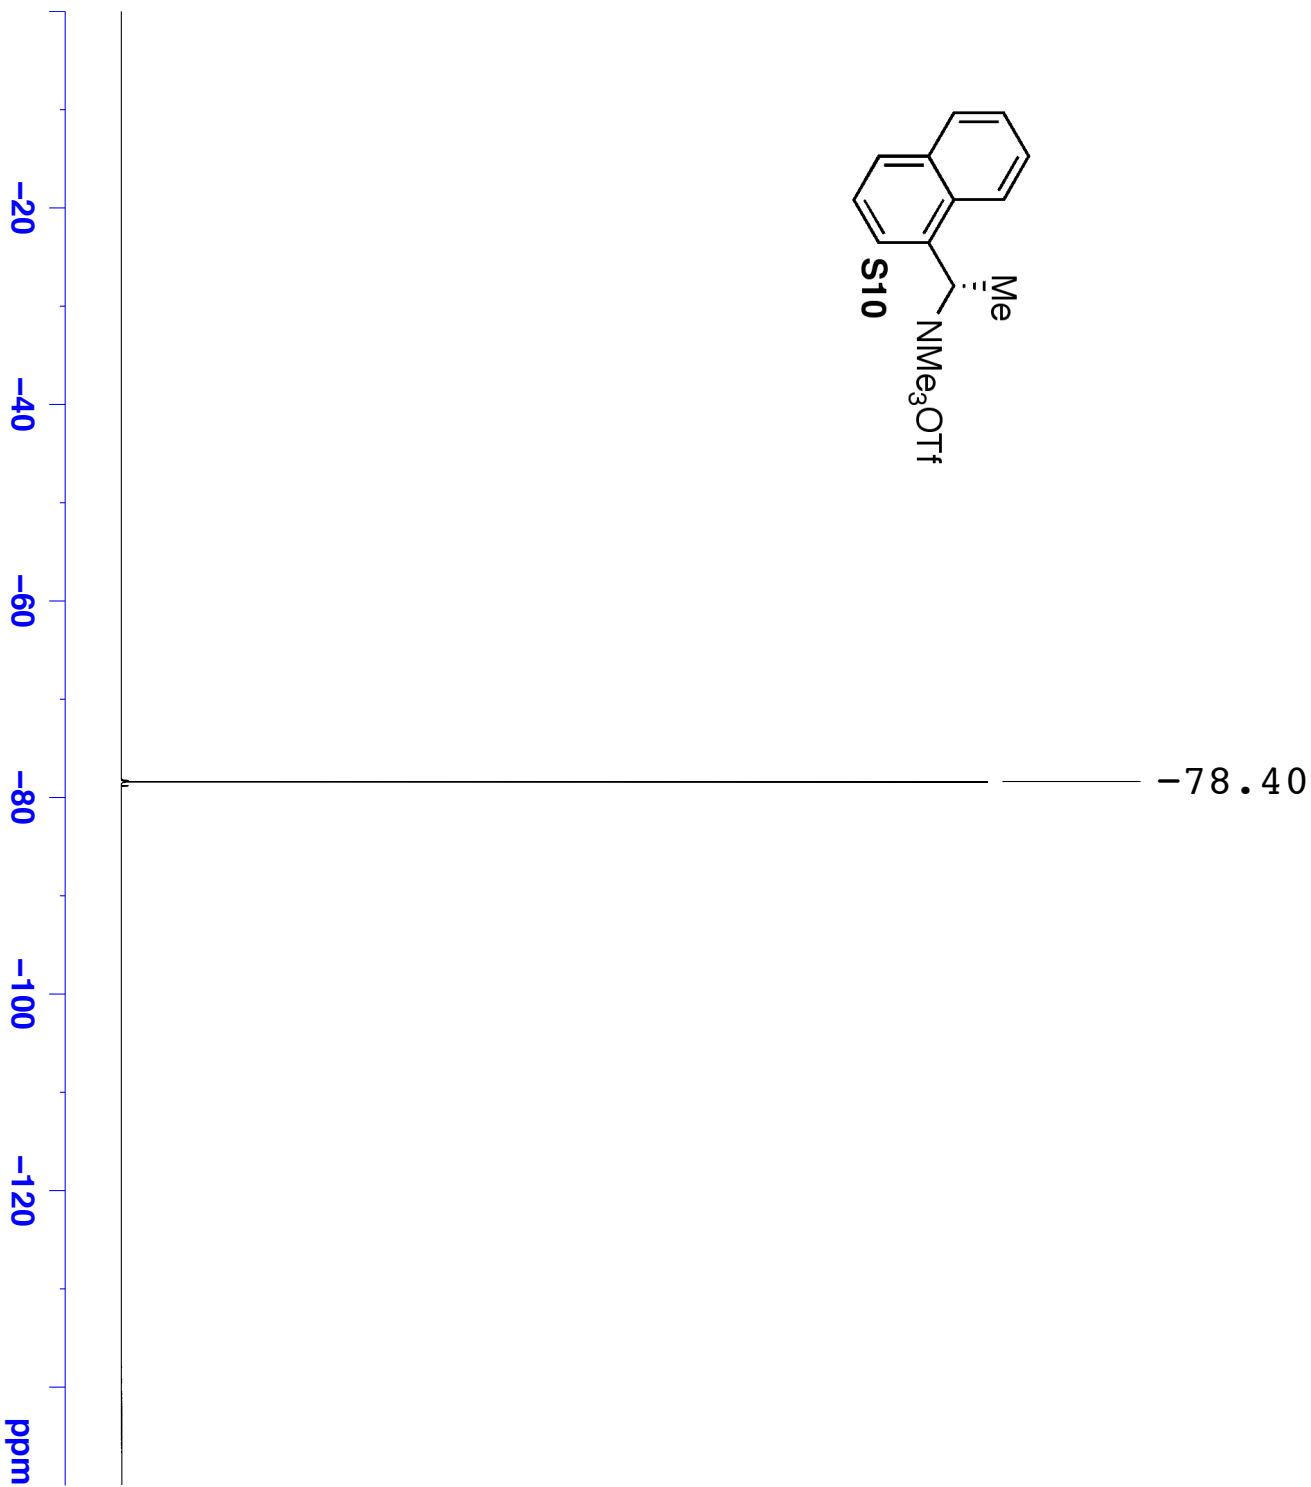

Current Data Parameters  
 NAME DMM3-CNSI-SALLT14  
 EXPNO 3  
 PROCNO 1

F2 - Acquisition Parameters

Date\_ 20120803  
 Time 19.09  
 INSTRUM spect  
 PROBHD 5 mm PABBO\_BB/  
 PULPROG zgfglqgn  
 TD 131072  
 SOLVENT CDCl3  
 NS 16  
 DS 4  
 SWH 133928.578 Hz  
 FIDRES 1.021794 Hz  
 AQ 0.4893855 sec  
 RG 362  
 DW 3.733 usec  
 DE 8.00 usec  
 TE 300.2 K  
 D1 3.00000000 sec  
 D11 0.03000000 sec  
 D12 0.00002000 sec  
 TD0 1

===== CHANNEL f1 =====  
 SF01 564.8086803 MHz  
 NUC1 19F  
 P1 11.62 usec

F2 - Processing parameters  
 SI 65536  
 SF 564.8651670 MHz  
 WDW EM  
 SSB 0  
 LB 2.00 Hz  
 GB 0  
 PC 1.00

Compound S11 1HNMR

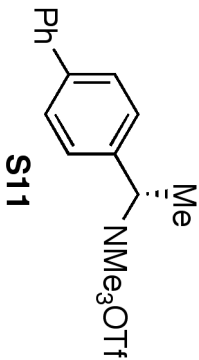

7.856  
7.842  
7.748  
7.735  
7.534  
7.521  
7.509  
7.450  
7.438  
7.426

5.101  
5.089  
5.077  
5.066

3.333

2.005  
1.994

Current Data Parameters  
NAME DMM3-CNSI-SALT15-C2  
EXPNO 1  
PROCNO 1

F2 - Acquisition Parameters

Date\_ 20120807  
Time 11.00  
INSTRUM spect  
PROBHD 5 mm PABBO BB/  
PULPROG zg30  
TD 65536  
SOLVENT Acetone  
NS 8  
DS 2  
SWH 8403.361 Hz  
FIDRES 0.128225 Hz  
AQ 3.8994420 sec  
RG 161  
DW 59.500 usec  
DE 17.39 usec  
TE 300.2 K  
D1 1.00000000 sec  
TD0 1

==== CHANNEL f1 =====

SFO1 600.3233018 MHz  
NUC1 1H  
P1 10.77 usec

F2 - Processing parameters

SI 65536  
SF 600.320000 MHz  
WDW EM  
SSB 0  
LB 0.30 Hz  
GB 0  
PC 1.00

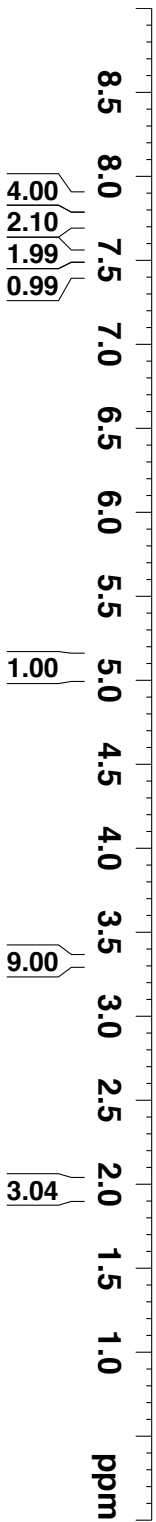

Compound S11: 13CNMR



S18

142.94  
139.57  
132.36  
129.03  
128.05  
127.51  
127.37  
126.94  
122.56  
120.43  
116.96

73.74

50.95  
50.92  
50.89

14.44

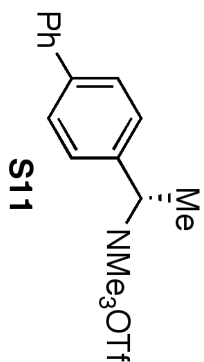

Current Data Parameters  
NAME DMMS-CNSI-SALT15-C2  
EXPNO 3  
PROCNO 1

F2 - Acquisition Parameters  
Date\_ 20120808  
Time\_ 20.30  
INSTRUM spect  
PROBHD 5 mm PABBO BB/  
PULPROG zgpg55  
TD 65536  
SOLVENT Acetone  
NS 2048  
DS 4  
SWH 34722.223 Hz  
FIDRES 0.529819 Hz  
AQ 0.9437684 sec  
RG 2050  
DW 14.400 usec  
DE 19.34 usec  
TE 300.2 K  
D1 1.10000002 sec  
D11 0.03000000 sec  
TD0 1

==== CHANNEL f1 =====  
SFO1 150.9656784 MHz  
NUC1 13C  
P1 10.63 usec

F2 - Processing parameters  
SI 32768  
SF 150.9505840 MHz  
WDW EM  
SSB 0  
LB 1.00 Hz  
GB 0  
PC 1.40

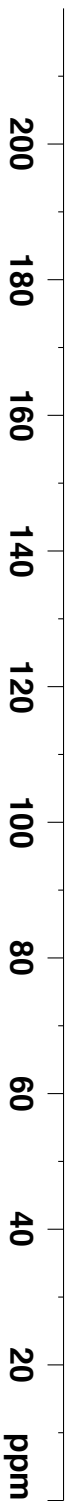

Compound S11 19FNMR

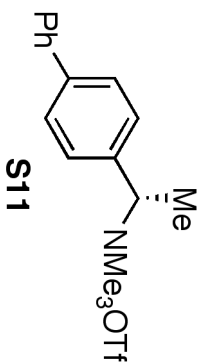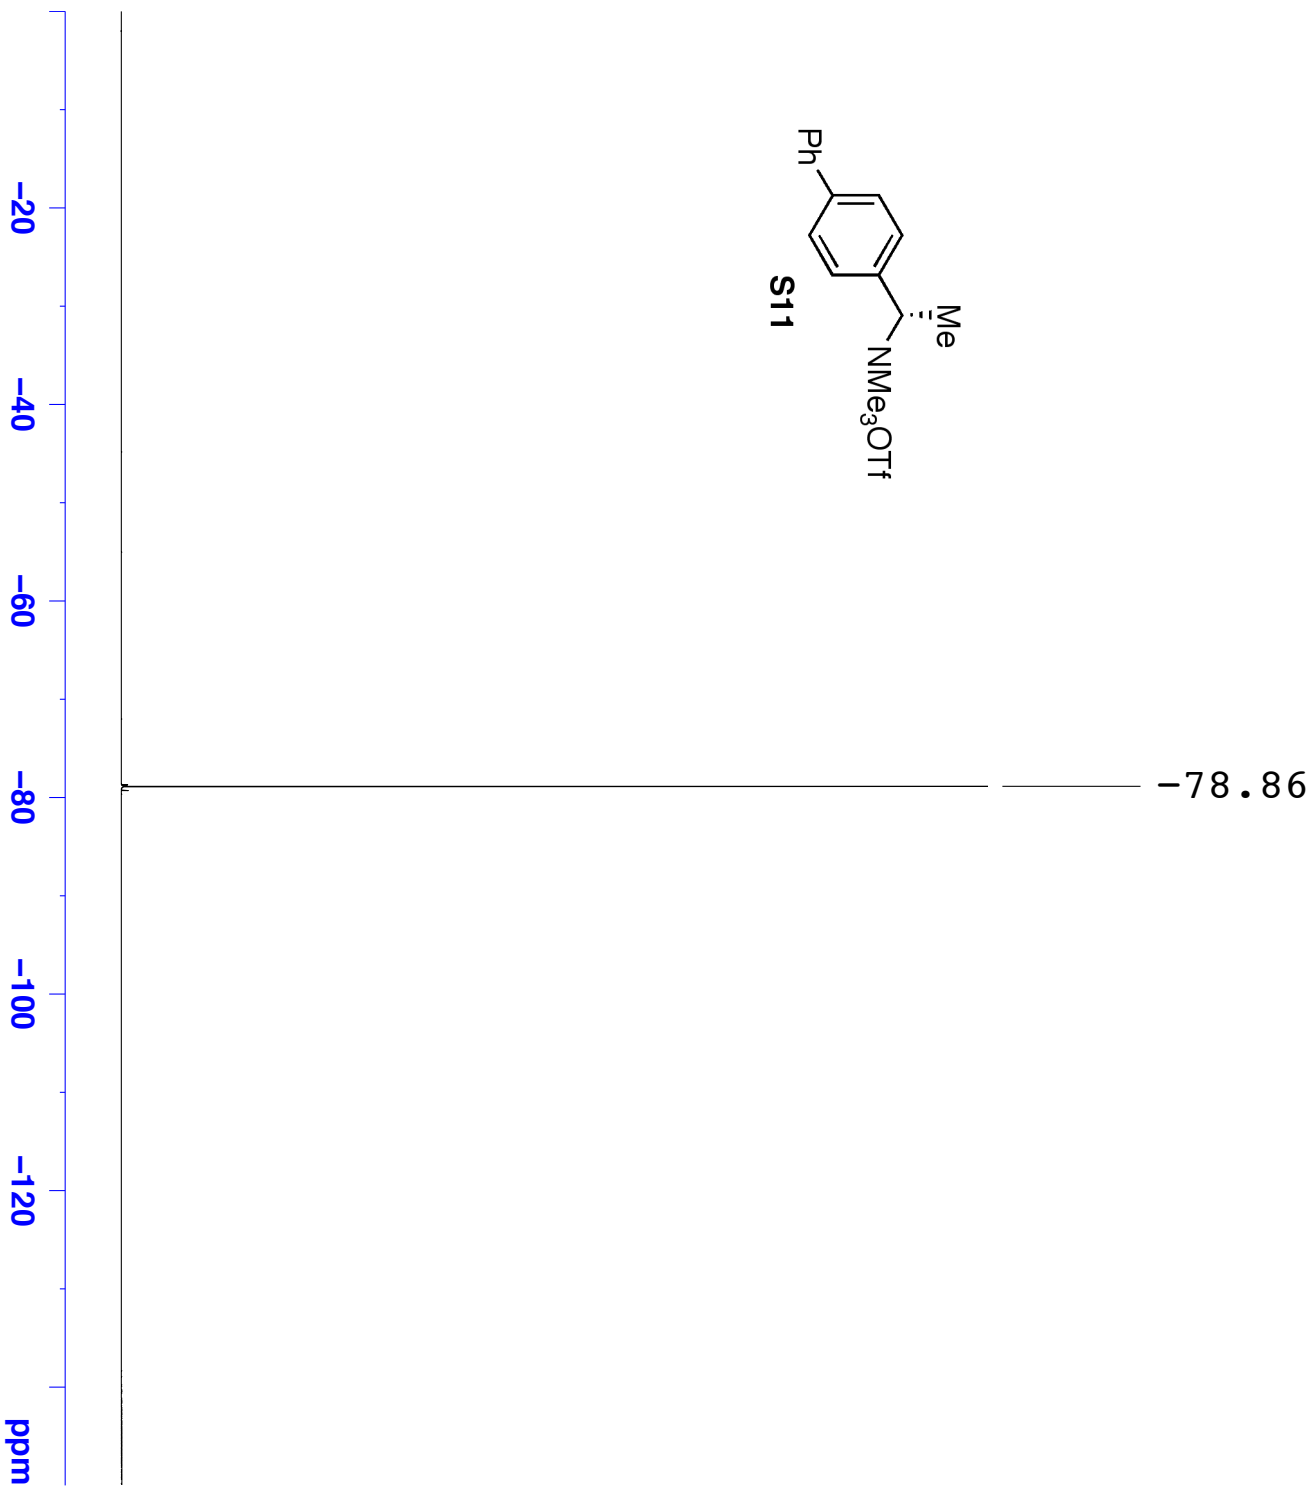

Current Data Parameters  
 NAME DM3-CNST-SALT15-C2  
 EXPNO 2  
 PROCNO 1

S169

F2 - Acquisition Parameters  
 Date\_ 20120807  
 Time 11.02  
 INSTRUM spect  
 PROBHD 5 mm PABBO BB/  
 PULPROG zgfh1gqn  
 TD 131072  
 SOLVENT Acetone  
 NS 16  
 DS 4  
 SWH 133928.578 Hz  
 FIDRES 1.021794 Hz  
 AQ 0.4893855 sec  
 RG 456  
 DE 3.733 usec  
 TE 300.2 K  
 D1 3.00000000 sec  
 D11 0.03000000 sec  
 D12 0.00002000 sec  
 TD0 1

==== CHANNEL f1 =====  
 SFO1 564.8086803 MHz  
 NUC1 19F  
 P1 11.62 usec

F2 - Processing parameters  
 SI 65536  
 SF 564.8651670 MHz  
 WDW EM  
 SSB 0  
 LB 2.00 Hz  
 GB 0  
 PC 1.00

Compound S12 1HNMR

Current Data Parameters  
 NAME DMM3-CNSI-SAT116  
 EXPNO 1  
 PROCNO 1

S170

7.586  
 7.577  
 7.572  
 7.563  
 7.200  
 7.186  
 7.172

4.954  
 4.942  
 4.931  
 4.919

3.148

1.830  
 1.819

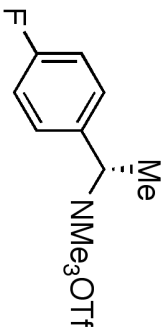

S12

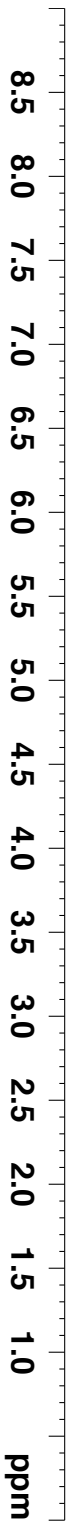

F2 - Acquisition Parameters  
 Date\_ 20120803  
 Time 19.29  
 INSTRUM spect  
 PROBHD 5 mm PABBO BB/  
 PULPROG zg30  
 TD 65536  
 SOLVENT CDCl3  
 NS 8  
 DS 2  
 SWH 8403.361 Hz  
 FIDRES 0.128225 Hz  
 AQ 3.8994420 sec  
 RG 161  
 DW 59.500 usec  
 DE 17.39 usec  
 TE 300.2 K  
 D1 1.00000000 sec  
 TD0 1

==== CHANNEL f1 =====  
 SF01 600.3233018 MHz  
 NUC1 1H  
 P1 10.77 usec  
 F2 - Processing parameters  
 SI 65536  
 SF 600.3200000 MHz  
 WDM EM  
 SSB 0  
 LB 0.30 Hz  
 GB 0  
 PC 1.00

Compound S12 13CNMR



S171

Current Data Parameters  
 NAME DM3-CNSI-SALT-16C  
 EXPNO 1  
 PROCNO 1

164.76  
163.09

128.36  
128.34  
123.86  
121.74  
119.63  
117.51  
116.63  
116.49

73.16

51.00  
50.97  
50.95

15.05

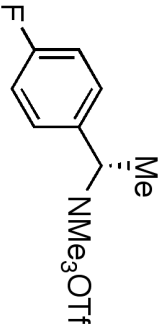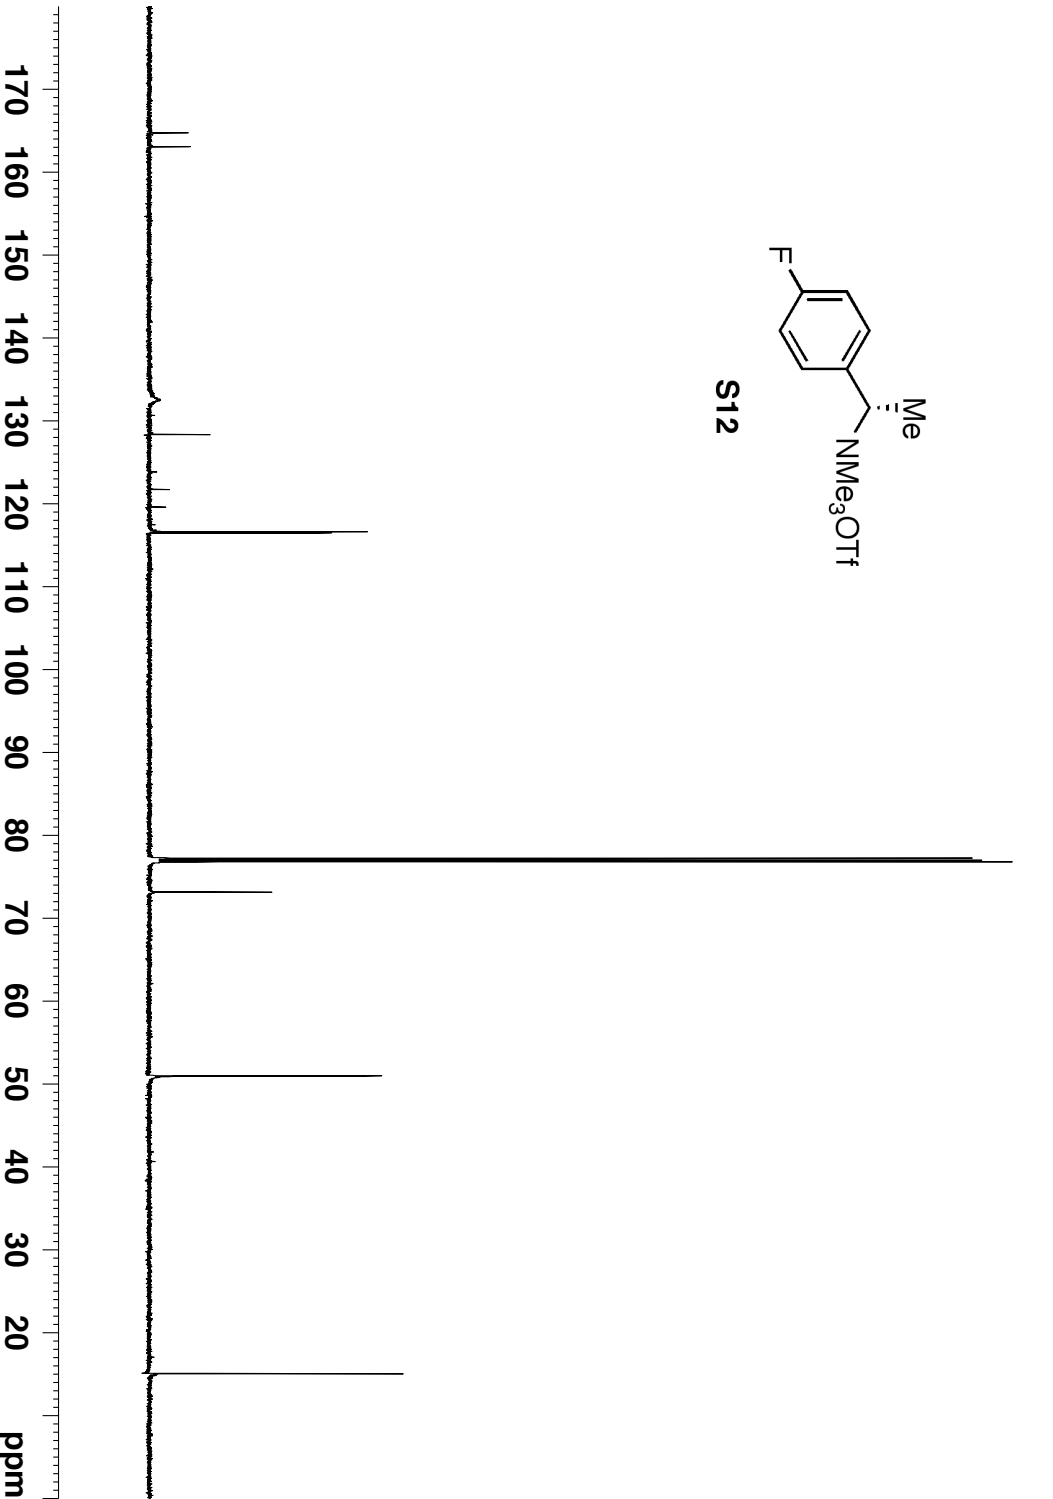

F2 - Acquisition Parameters

Date\_ 20120805  
 Time\_ 9.42  
 INSTRUM spect  
 PROBHD 5 mm PABBO BB/  
 PULPROG zgpg55  
 TD 65536  
 SOLVENT CDCl3  
 NS 2048  
 DS 4  
 SWH 34722.223 Hz  
 FIDRES 0.529819 Hz  
 AQ 0.9437684 sec  
 RG 2050  
 DW 14.400 usec  
 DE 19.34 usec  
 TE 300.2 K  
 D1 1.1000002 sec  
 D11 0.0300000 sec  
 TD0 1

==== CHANNEL f1 =====

SFO1 150.9656784 MHz  
 NUC1 13C  
 P1 10.63 usec

F2 - Processing parameters

SI 32768  
 SF 150.9505840 MHz  
 WDW EM  
 SSB 0  
 LB 1.00 Hz  
 GB 0  
 PC 1.40

Compound S12 19F NMR

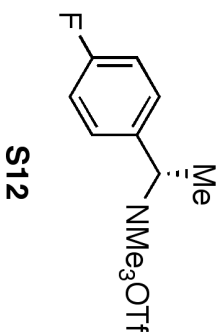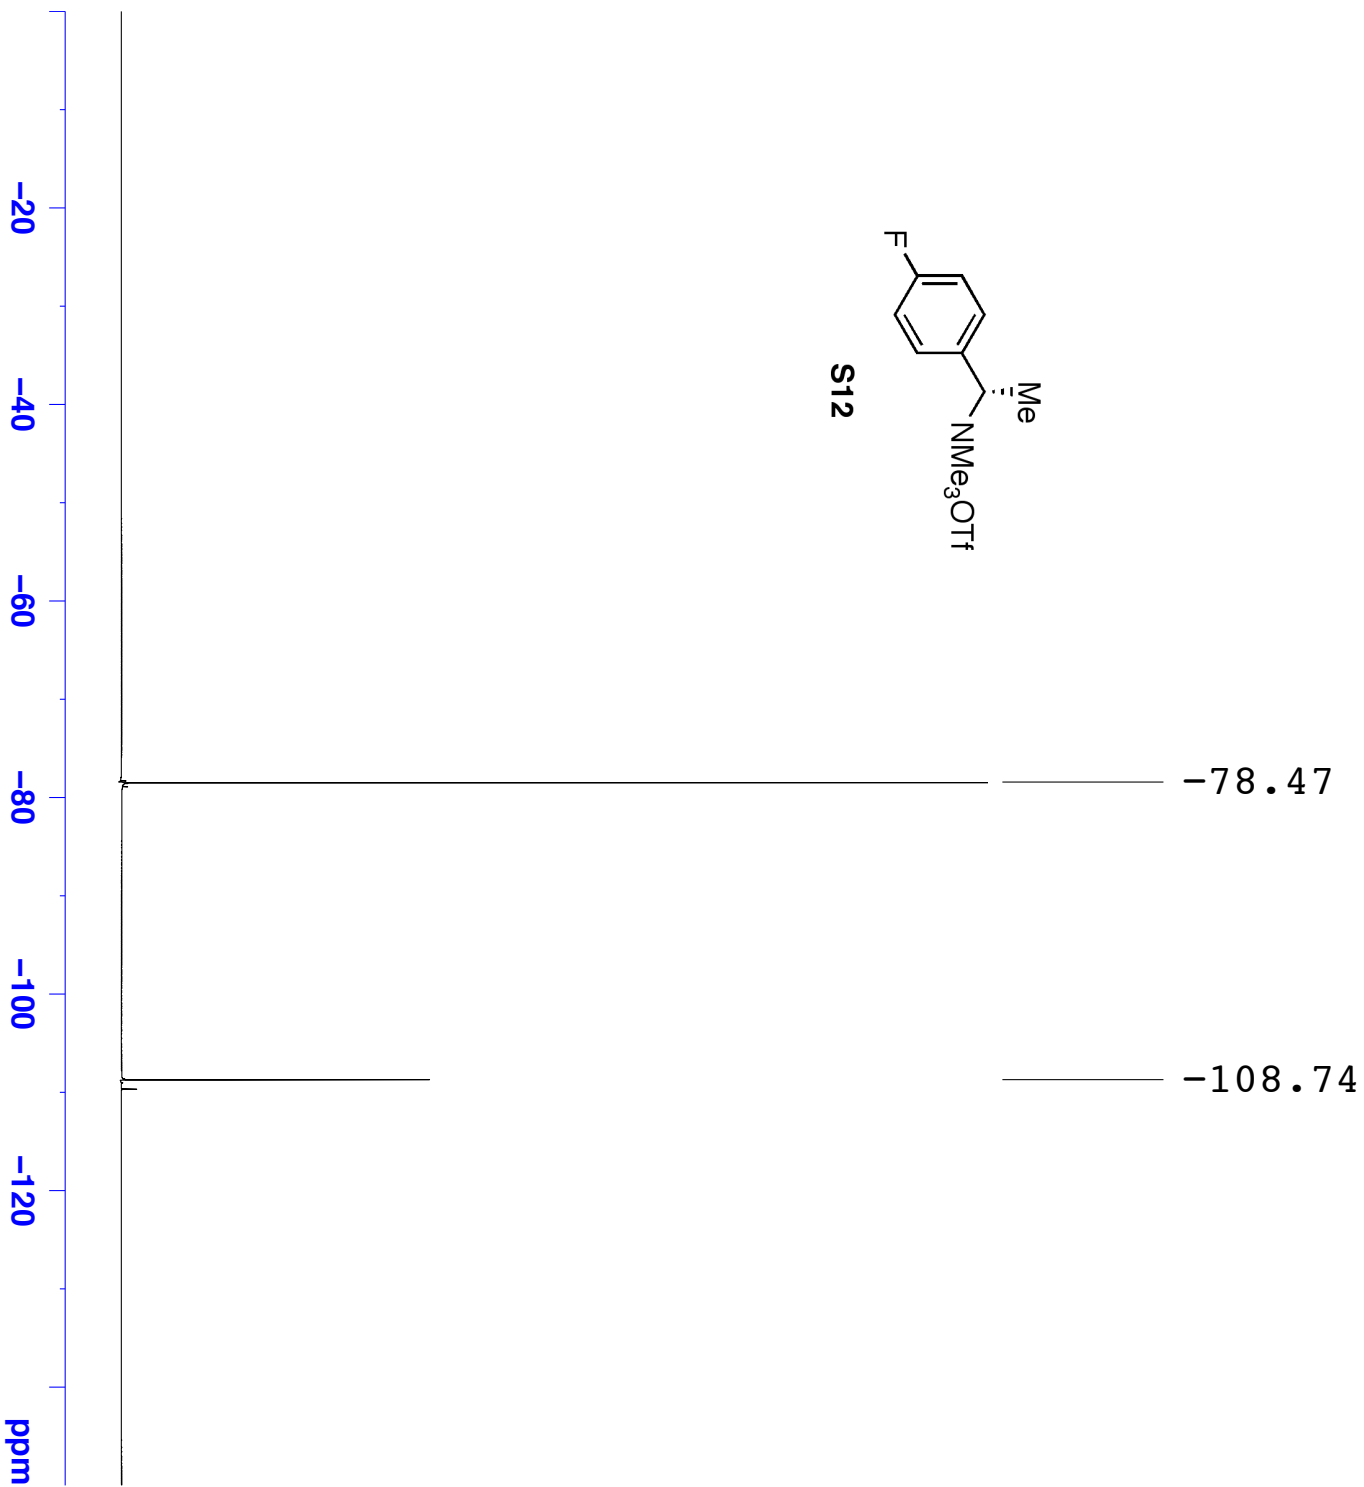

Current Data Parameters  
 NAME DM3-CNST-SALT16  
 EXPNO 3  
 PROCNO 1

F2 - Acquisition Parameters

Date\_ 20120803  
 Time 19.42  
 INSTRUM spect  
 PROBHD 5 mm PABBO BB/  
 PULPROG zgpg30  
 TD 131072  
 SOLVENT CDCl3  
 NS 16  
 DS 4  
 SWH 133928.578 Hz  
 FIDRES 1.021794 Hz  
 AQ 0.4893855 sec  
 RG 362  
 DW 3.733 usec  
 DE 8.00 usec  
 TE 300.2 K  
 D1 3.00000000 sec  
 D11 0.03000000 sec  
 D12 0.00002000 sec  
 TD0 1

==== CHANNEL f1 =====  
 SFO1 564.8086803 MHz  
 NUC1 19F  
 P1 11.62 usec

F2 - Processing parameters

SI 65536  
 SF 564.8651670 MHz  
 WDW EM  
 SSB 0  
 LB 2.00 Hz  
 GB 0  
 PC 1.00



Compound S13 1HNMR

Current Data Parameters  
 NAME DM3-CNSI-SAT117  
 EXPNO 1  
 PROCNO 1

F2 - Acquisition Parameters

Date\_ 20120803  
 Time 19.45  
 INSTRUM spect  
 PROBHD 5 mm PABBO BB/  
 PULPROG zg30  
 TD 65536  
 SOLVENT CDCl3  
 NS 8  
 DS 2  
 SWH 8403.361 Hz  
 FIDRES 0.128225 Hz  
 AQ 3.8994420 sec  
 RG 161  
 DW 59.500 usec  
 DE 17.39 usec  
 TE 300.2 K  
 D1 1.00000000 sec  
 TD0 1

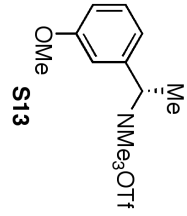

|       |       |       |
|-------|-------|-------|
| 7.407 | 4.836 | 1.823 |
| 7.394 | 4.825 | 1.812 |
| 7.380 | 4.813 |       |
| 7.075 | 4.802 |       |
| 7.063 | 4.771 |       |
| 7.032 |       |       |
| 7.018 |       |       |
|       | 3.854 |       |
|       | 3.159 |       |

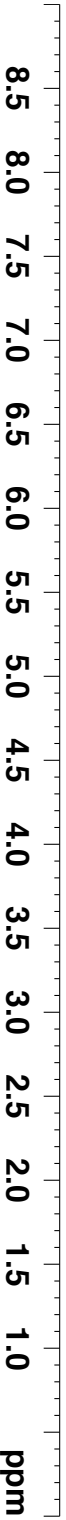

1.01  
 1.93  
 1.07

1.22

3.06

9.00

3.06

==== CHANNEL f1 =====  
 SF01 600.3233018 MHz  
 NUC1 1H  
 P1 10.77 usec  
 F2 - Processing parameters  
 SI 65536  
 SF 600.320000 MHz  
 WDM EM  
 SSB 0  
 LB 0.30 Hz  
 GB 0  
 PC 1.00

Compound S13 13CNMR



S174

Current Data Parameters  
 NAME DM3-CNSI-SALT-17C  
 EXPNO 1  
 PROCNO 1

|        |
|--------|
| 160.12 |
| 133.79 |
| 130.43 |
| 123.71 |
| 121.60 |
| 119.48 |
| 117.35 |
| 116.27 |
| 74.13  |
| 55.56  |
| 51.22  |
| 51.19  |
| 51.17  |
| 14.95  |

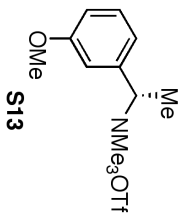

F2 - Acquisition Parameters

Date\_ 20120805  
 Time\_ 10.57  
 INSTRUM spect  
 PROBHD 5 mm PABBO BB/  
 PULPROG zgpg55  
 TD 65536  
 SOLVENT CDCl3  
 NS 2048  
 DS 4

SWH 34722.223 Hz  
 FIDRES 0.529819 Hz  
 AQ 0.9437684 sec  
 RG 2050  
 DW 14.400 usec  
 DE 19.34 usec  
 TE 300.2 K  
 D1 1.1000002 sec  
 D11 0.0300000 sec  
 TD0 1

==== CHANNEL f1 =====  
 SFO1 150.9656784 MHz  
 NUC1 13C  
 P1 10.63 usec

F2 - Processing parameters  
 SI 32768  
 SF 150.9505840 MHz  
 WDW EM  
 SSB 0  
 LB 1.00 Hz  
 GB 0  
 PC 1.40

Compound S13 19F NMR

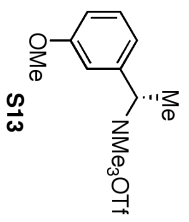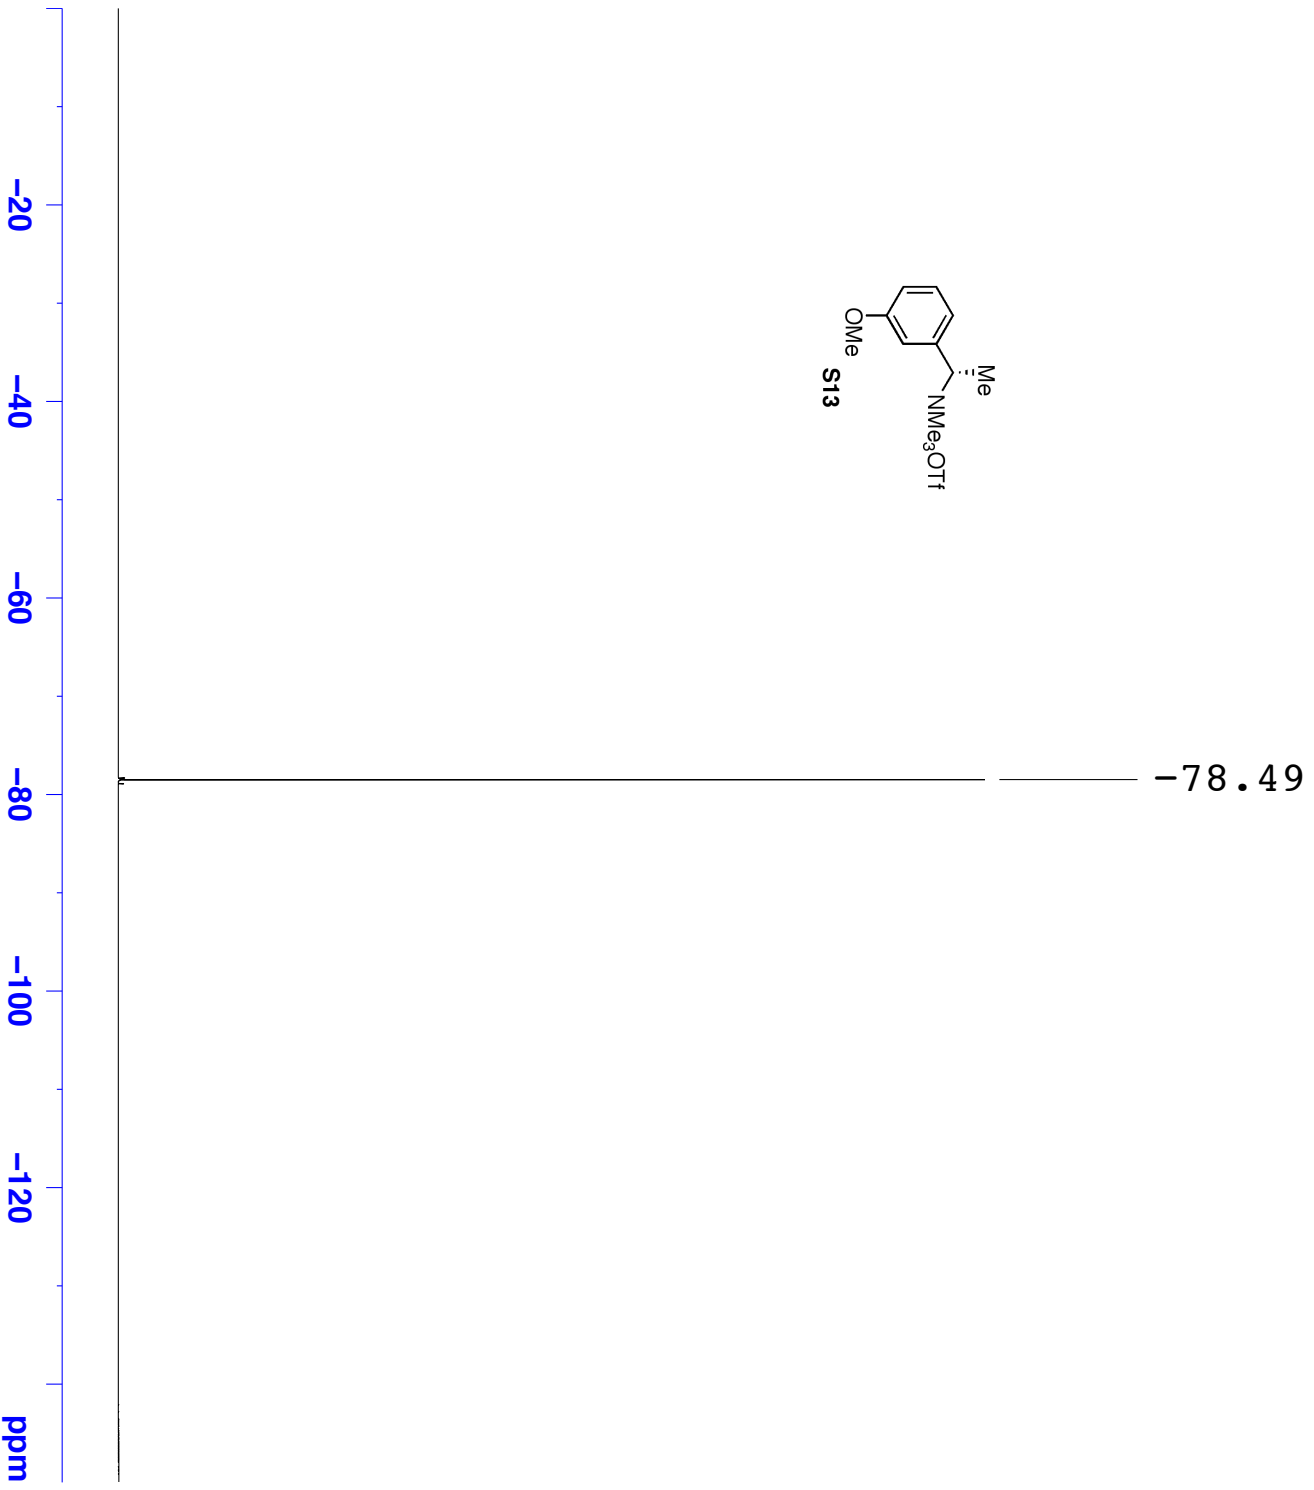

Current Data Parameters  
 NAME DMM3-CNSTI-SALIT17  
 EXPNO 3  
 PROCNO 1

F2 - Acquisition Parameters

Date\_ 20120803  
 Time 19.58  
 INSTRUM spect  
 PROBHD 5 mm PABBO BB/  
 PULPROG zgpg30  
 TD 131072  
 SOLVENT CDCl3  
 NS 16  
 DS 4  
 SWH 133928.578 Hz  
 FIDRES 1.021794 Hz  
 AQ 0.4893855 sec  
 RG 362  
 DW 3.733 usec  
 DE 8.00 usec  
 TE 300.2 K  
 D1 3.00000000 sec  
 D11 0.03000000 sec  
 D12 0.00002000 sec  
 TD0 1

==== CHANNEL f1 =====  
 SFO1 564.8086803 MHz  
 NUC1 19F  
 P1 11.62 usec

F2 - Processing parameters  
 SI 65536  
 SF 564.8651670 MHz  
 WDW EM  
 SSB 0  
 LB 2.00 Hz  
 GB 0  
 PC 1.00

Compound, S-14, <sup>1</sup>H NMR

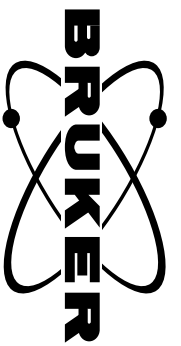

S176

- 7.637
- 7.620
- 7.618
- 7.593
- 7.572
- 7.480
- 7.461
- 7.442
- 7.404
- 7.383
- 7.378
- 7.365
- 7.360
- 7.342

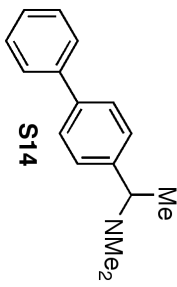

Current Data Parameters  
 NAME PM-4-12  
 EXPNO 1  
 PROCNO 1

F2 - Acquisition Parameters  
 Date\_ 20120628  
 Time\_ 13.19  
 INSTRUM spect  
 PROBHD 5 mm CPQNP 1H/  
 PULPROG zg30  
 TD 65536  
 SOLVENT CDCl3  
 NS 16  
 DS 2  
 SWH 8278.146 Hz  
 FIDRES 0.126314 Hz  
 AQ 3.9584243 sec  
 RG 10.1  
 DW 60.400 usec  
 DE 6.00 usec  
 TE 298.2 K  
 D1 1.00000000 sec  
 TD0 1

==== CHANNEL f1 =====  
 NUC1 1H  
 P1 15.00 usec  
 PL1 4.90 dB  
 PL1W 3.30822015 W  
 SFO1 400.1324710 MHz

F2 - Processing parameters  
 SI 32768  
 SF 400.1300000 MHz  
 WDW EM  
 SSB 0  
 LB 0.30 Hz  
 GB 0  
 PC 1.00

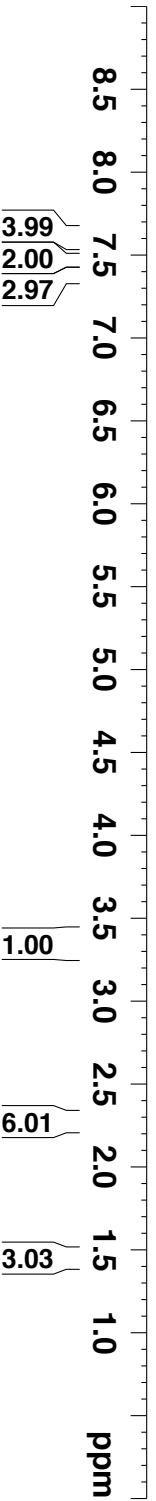

Compound S-14, <sup>13</sup>CNMR

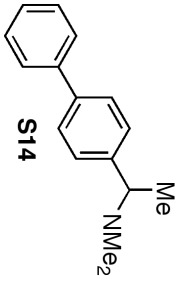

143.18  
140.98  
139.79  
128.75  
127.97  
127.13  
127.06  
126.97

65.66  
43.31  
20.25

170 160 150 140 130 120 110 100 90 80 70 60 50 40 30 20 ppm

Current Data Parameters  
NAME PM-4-12  
EXPNO 2  
PROCNO 1

F2 - Acquisition Parameters  
Date\_ 20120628  
Time\_ 22.36

INSTRUM spect  
PROBHD 5 mm CPQNP 1H/  
PULPROG zgpg30  
TD 65536  
SOLVENT CDCl3  
NS 256  
DS 4

SWH 23980.814 Hz  
FIDRES 0.365918 Hz  
AQ 1.3664756 sec  
RG 512  
DW 20.850 usec  
DE 18.00 usec  
TE 298.2 K  
D1 2.00000000 sec  
D11 0.03000000 sec  
TD0 1

==== CHANNEL f1 =====  
NUC1 13C  
P1 9.25 usec  
PL1 0.55 dB  
PL1W 35.18820572 W  
SF01 100.6228298 MHz

==== CHANNEL f2 =====  
CPDPRG2 waltz16  
NUC2 1H  
PCPD2 90.00 usec  
PL2 4.90 dB  
PL12 20.46 dB  
PL13 21.00 dB  
PL12W 3.30822015 W  
PL12W 0.09195905 W  
PL13W 0.08120718 W  
SF02 400.1316005 MHz

F2 - Processing parameters  
SI 32768  
SF 100.6127690 MHz  
WDW EM  
SSB 0  
LB 1.00 Hz  
GB 0  
PC 1.40

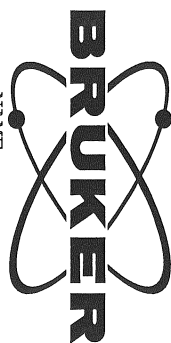

S178

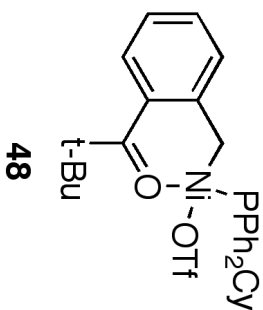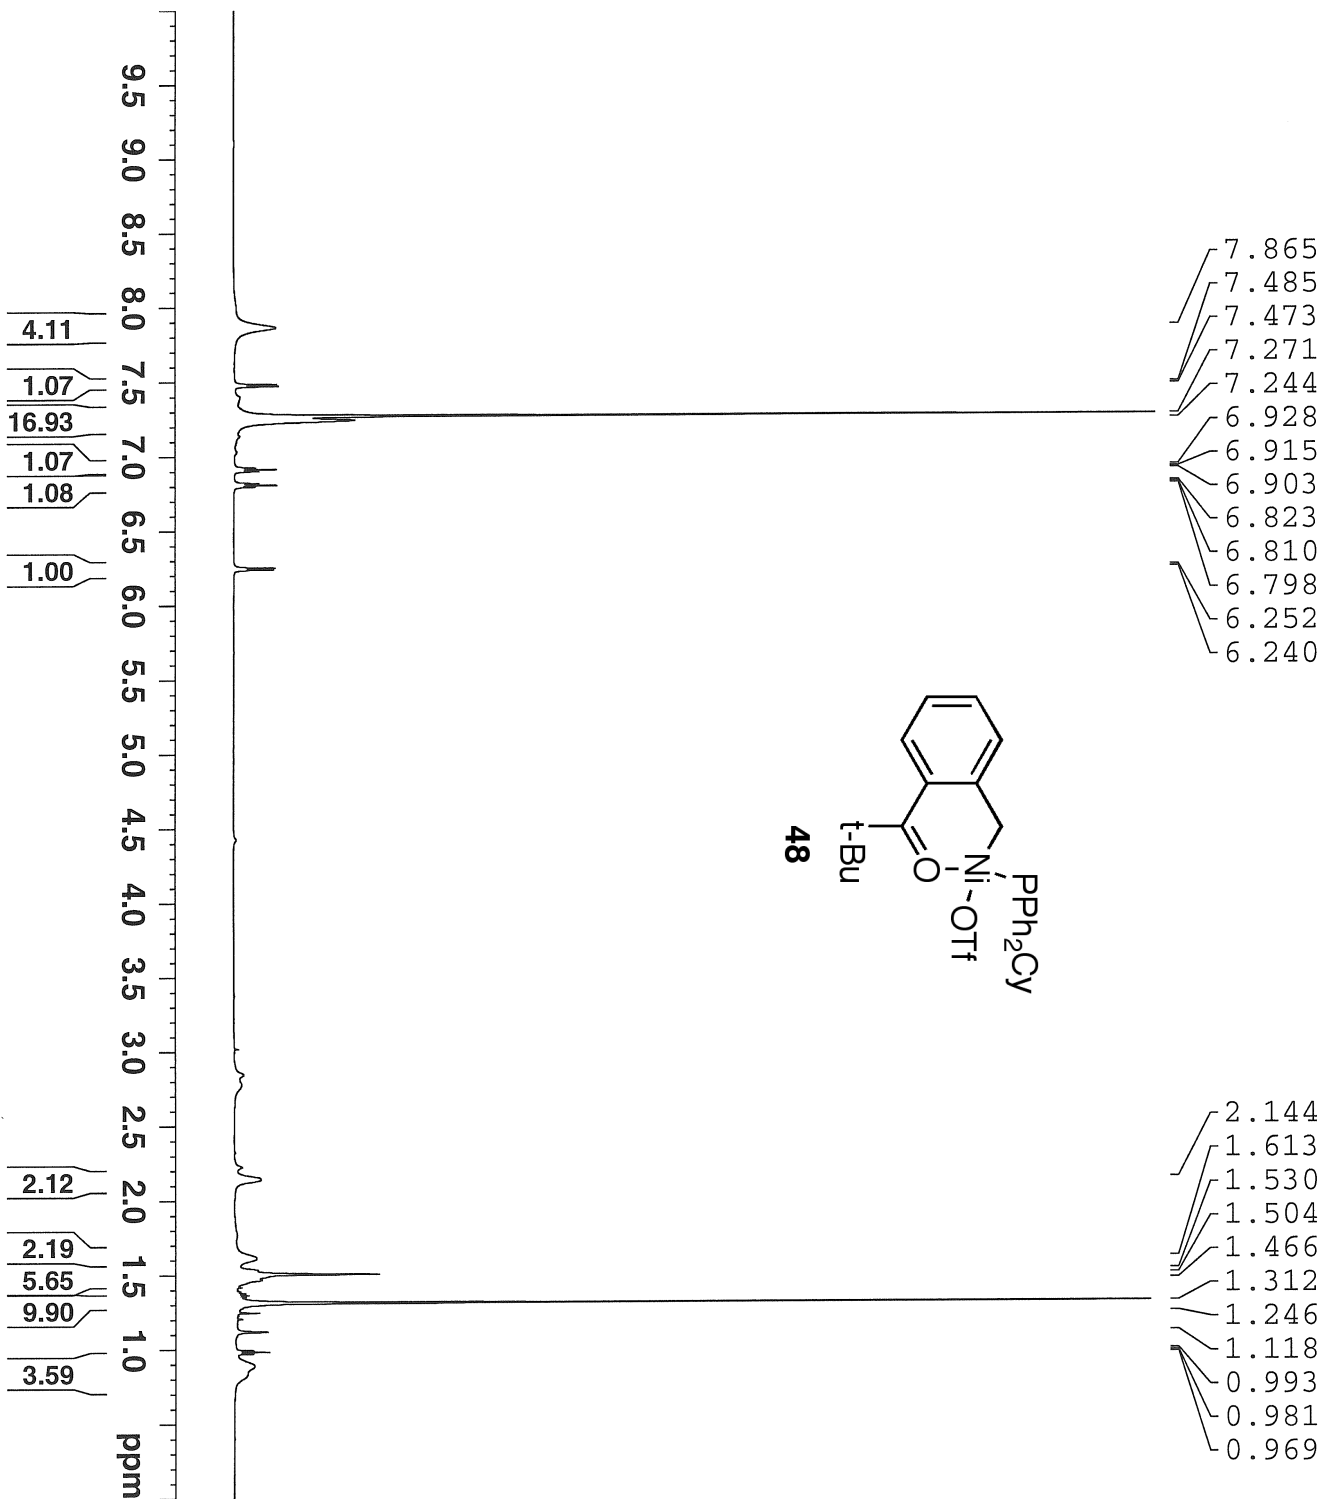

```

===== CHANNEL F1 =====
NAME                               first
EXPNO                               1
PROCNO                              1
Date_                               20120831
Time                                10.36
INSTRUM                             spect
PROBHD                             5 mm PATTX1 1H/
PULPROG                             zg30
TD                                 65536
SOLVENT                             C6D6
NS                                  16
DS                                  2
SMW                               12376.237 Hz
FIDRES                             0.188846 Hz
AQ                                 2.6477449 sec
RG                                  35.9
DE                                40.400 usec
TE                                 298.0 K
D1                                 1.00000000 sec
TD0                                 1

===== CHANNEL F1 =====
NUC1                                1H
P1                                 9.90 usec
PL1                                 0.00 dB
PL1W                               14.97084332 W
SF01                               600.1337060 MHz
SI                                 32768
SF                                 600.1300000 MHz
WDW                                 no
SSB                                 0
LB                                 0.00 Hz
GB                                 0
PC                                 1.00
    
```

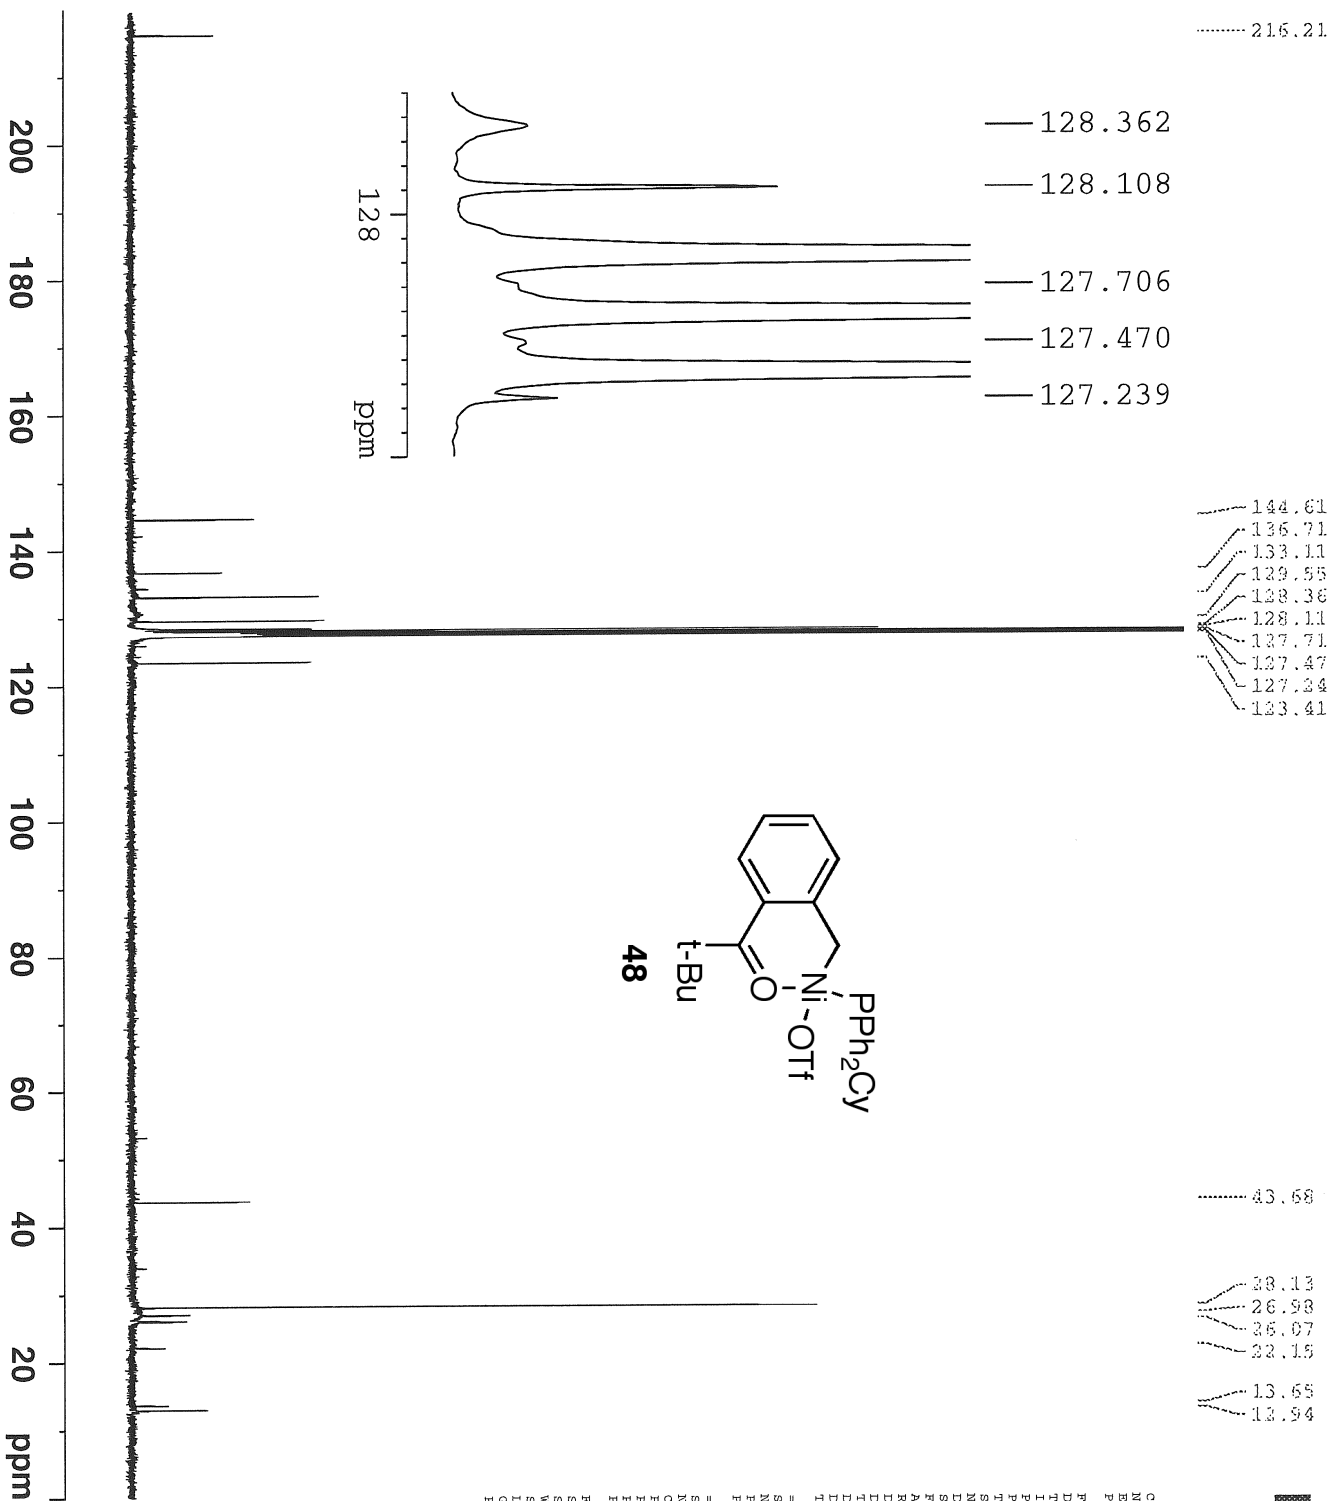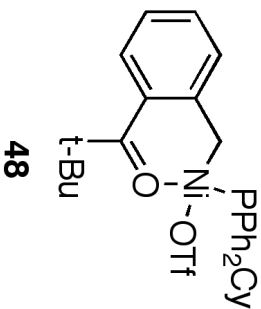

- ..... 215.21
- 144.61
- 136.71
- 133.11
- 129.55
- 128.36
- 128.11
- 127.71
- 127.47
- 127.34
- 123.41
- ..... 43.68
- 28.13
- 26.98
- 26.07
- 22.15
- 13.68
- 12.94

Current Data Parameters  
 Name: DMDS-PPPh<sub>2</sub>Cy1 complex benzyl amine derivative-c  
 EXPNO: 1  
 PROCNO: 1

F2 - Acquisition Parameters

Date\_: 20120829  
 Time: 19.22  
 INSTRUM: spect  
 PROBRD: 5 mm PABBO/SPB5/  
 PULPROG: zgpg30  
 TD: 65536  
 SOLVENT: C6D6  
 NS: 999  
 DS: 4  
 SFO: 24038.464 Hz  
 F2: 40364768 Hz  
 AQ: 1.3631488 sec  
 RG: 203  
 DW: 20.800 usec  
 DE: 22.82 usec  
 TE: 333.0 K  
 D1: 2.0000000 sec  
 D11: 0.3500000 sec  
 D12: 0.3500000 sec  
 D13: 0.3500000 sec  
 D14: 0.3500000 sec  
 D15: 0.3500000 sec  
 D16: 0.3500000 sec  
 D17: 0.3500000 sec  
 D18: 0.3500000 sec  
 D19: 0.3500000 sec  
 D20: 0.3500000 sec

===== CHANNEL F1 =====

SFO1 100.6278593 MHz  
 NUC1 13C  
 P1 10.00 usec  
 PL1 0.0000000 W  
 PLW1 43.0000000 W

===== CHANNEL F2 =====

SFO2 400.1516006 MHz  
 NUC2 1H  
 P2 10.00 usec  
 PL2 0.0000000 W  
 PLW2 0.27042001 W  
 PLW3 0.21904001 W

F2 - Processing parameters

SI 32768  
 SF 100.6177980 MHz  
 W 65536  
 SSB 0  
 LB 1.00 Hz  
 GB 0  
 PC 1.40

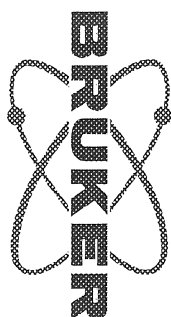

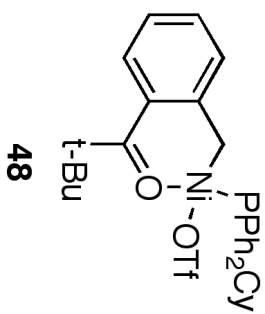

-77.55

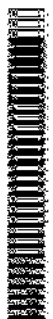

Current Data Parameters  
 NAME PM-3-279-1-F  
 EXPNO 3  
 PROCNO 1

F2 - Acquisition Parameters  
 Date\_ 20120609  
 Time\_ 17.04  
 INSTRUM spect  
 PROBHD 5 mm PABBO BB/  
 PULPROG zg30  
 TD 131072  
 SOLVENT C6D6  
 NS 16  
 DS 4  
 SWH 89285.711 Hz  
 FIDRES 0.681196 Hz  
 AO 0.7340032 sec  
 RG 203  
 DW 5.600 usec  
 DE 10.00 usec  
 TE 300.0 K  
 D1 1.00000000 sec  
 TD0 1

==== CHANNEL f1 =====  
 SF01 376.4795333 MHz  
 NUC1 19F  
 P1 15.00 usec  
 PLW1 13.50000000 W

F2 - Processing parameters  
 SI 65536  
 SF 376.5171850 MHz  
 WDW EM  
 SSB 0  
 LB 0.30 Hz  
 GB 0  
 PC 1.00

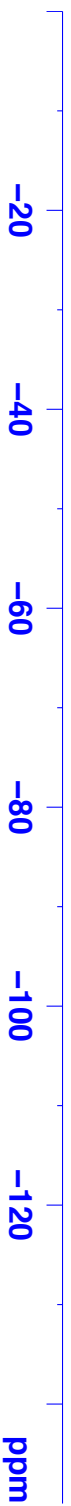



Compound 48, 31P NMR

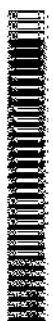

S181

Current Data Parameters  
 NAME PM-3-279-1-P  
 EXPNO 1  
 PROCNO 1

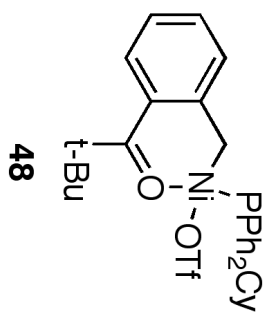

F2 - Acquisition Parameters

Date\_ 20120609  
 Time\_ 16.51  
 INSTRUM spect  
 PROBHD 5 mm PABBO BB/  
 PULPROG zg30  
 TD 65536  
 SOLVENT C6D6  
 NS 32  
 DS 4  
 SWH 64102.562 Hz  
 FIDRES 0.978127 Hz  
 AQ 0.5111808 sec  
 RG 203  
 DW 7.800 usec  
 DE 6.50 usec  
 TE 300.0 K  
 D1 2.00000000 sec  
 TD0 1

==== CHANNEL f1 =====  
 SF01 161.9755899 MHz  
 NUC1 31P  
 P1 8.00 usec  
 PLW1 35.00000000 W

F2 - Processing parameters

SI 32768  
 SF 161.9836890 MHz  
 WDW EM  
 SSB 0  
 LB 1.00 Hz  
 GB 0  
 PC 1.40

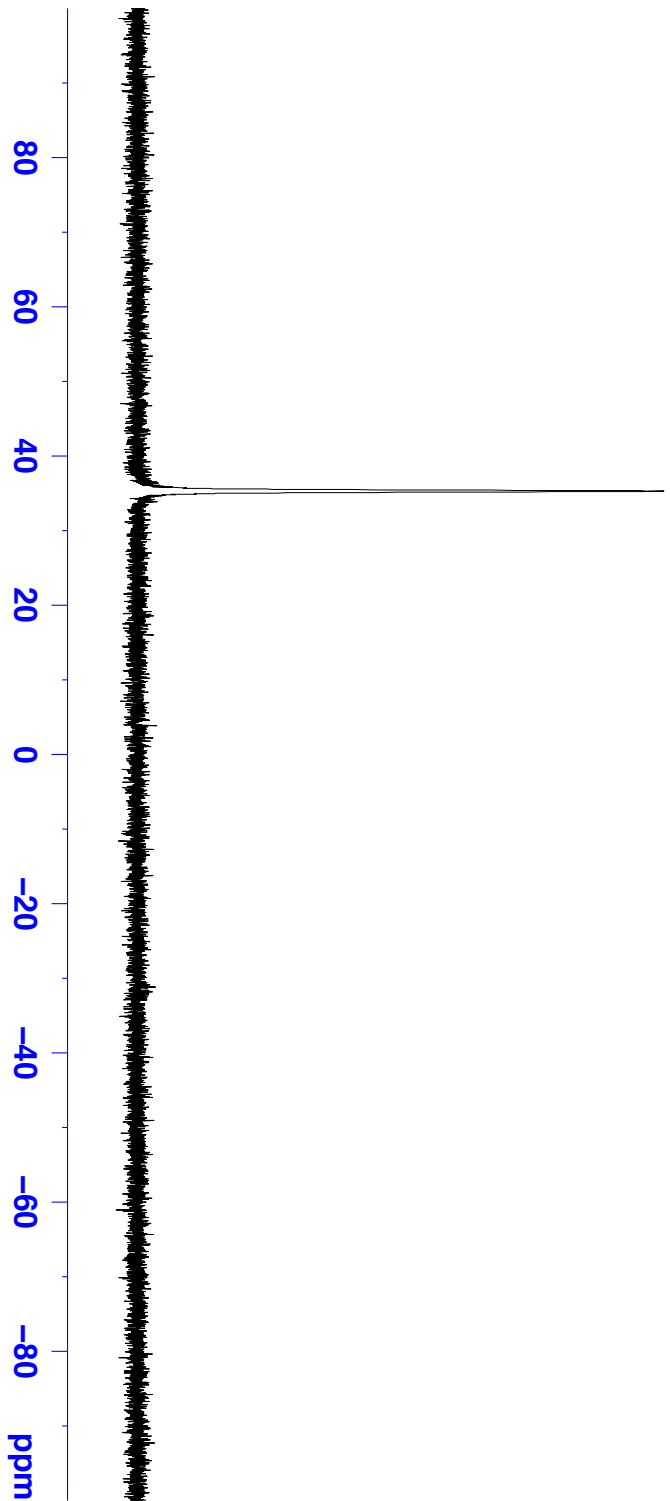

Compound 29, 1HNMR with internal standard-1

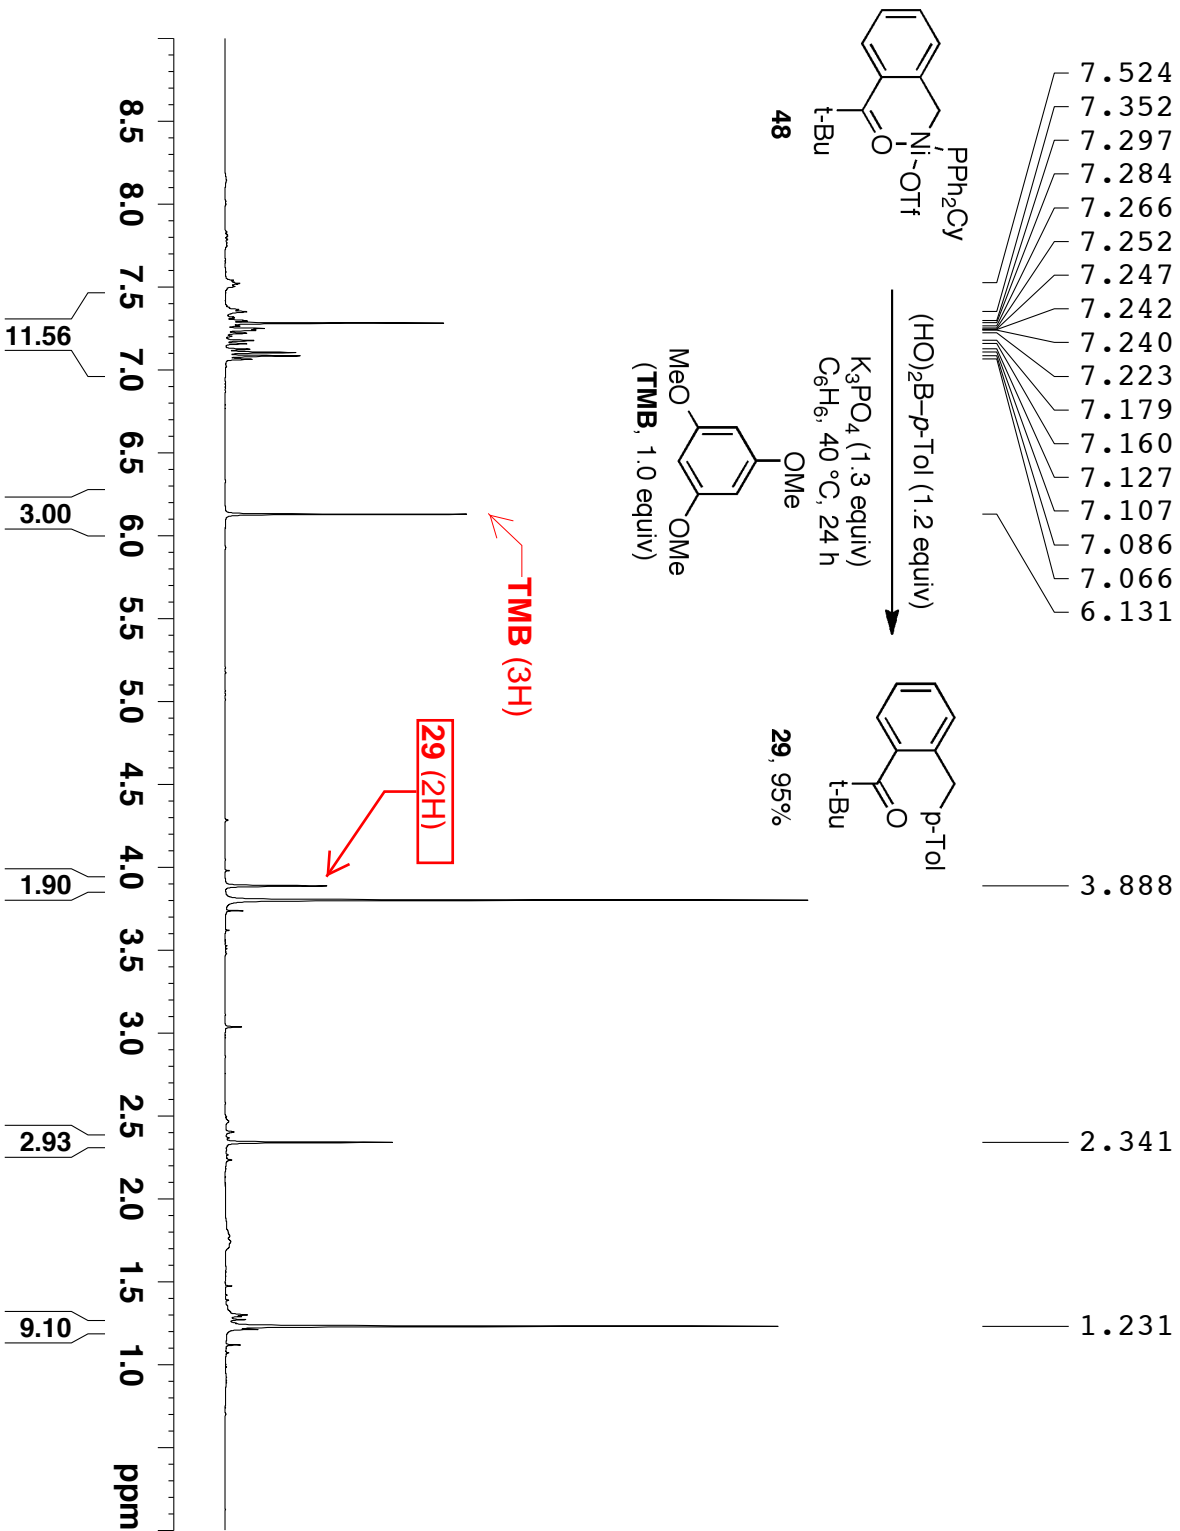

Current Data Parameters  
 NAME PM-4-2-Rerun  
 EXPNO 1  
 PROCNO 1

F2 - Acquisition Parameters  
 Date\_ 20120817  
 Time\_ 15.27  
 INSTRUM spect  
 PROBHD 5 mm CPQNP 1H/  
 PULPROG zg30  
 TD 65536  
 SOLVENT CDCl3  
 NS 16  
 DS 2  
 SWH 8278.146 Hz  
 FIDRES 0.126314 Hz  
 AQ 3.9584243 sec  
 RG 9  
 DW 60.400 usec  
 DE 6.00 usec  
 TE 298.2 K  
 D1 4.00000000 sec  
 TD0 1

==== CHANNEL f1 =====  
 NUC1 1H  
 P1 15.00 usec  
 PL1 4.90 dB  
 PL1W 3.30822015 W  
 SFO1 400.1324710 MHz

F2 - Processing parameters  
 SI 32768  
 SF 400.1300000 MHz  
 WDW EM  
 SSB 0  
 LB 0.30 Hz  
 GB 0  
 PC 1.00

Compound 29, <sup>1</sup>H NMR, with Internal Standard-2

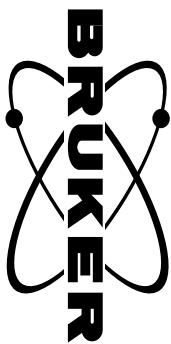

- 7.356
- 7.300
- 7.284
- 7.269
- 7.254
- 7.250
- 7.244
- 7.242
- 7.226
- 7.181
- 7.162
- 7.130
- 7.109
- 7.089
- 7.069
- 6.133

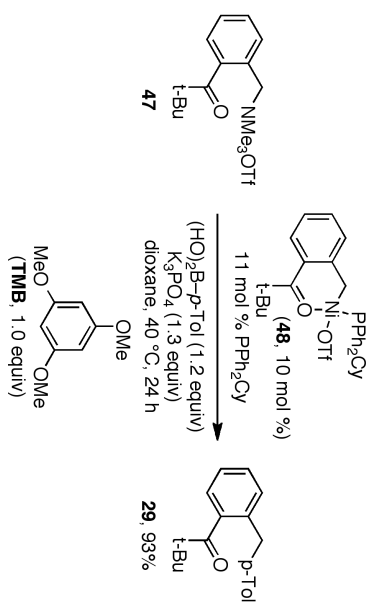

- 3.892
- 2.344
- 1.234

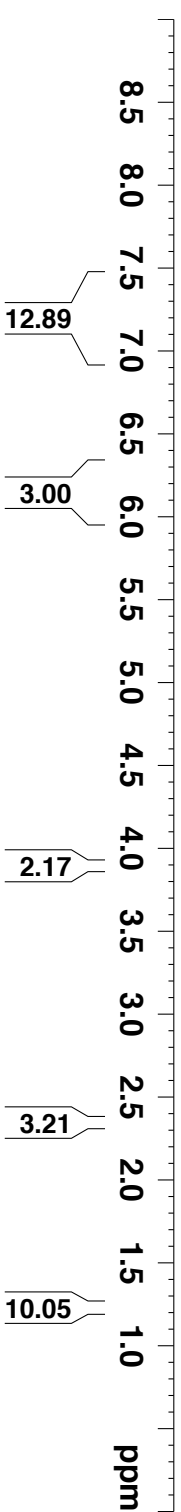

TMB (3H)  
29 (2H)

Current Data Parameters  
NAME PM-4-1-Rerun  
EXPNO 1  
PROCNO 1

F2 - Acquisition Parameters  
Date\_ 20120817  
Time\_ 15.20  
INSTRUM spect  
PROBHD 5 mm CPQNP 1H/  
PULPROG zg30  
TD 65536  
SOLVENT CDCl3  
NS 16  
DS 2  
SWH 8278.146 Hz  
FIDRES 0.126314 Hz  
AQ 3.9584243 sec  
RG 10.1  
DW 60.400 usec  
DE 6.00 usec  
TE 298.1 K  
D1 4.00000000 sec  
TD0 1

==== CHANNEL f1 =====  
NUC1 1H  
P1 15.00 usec  
PL1 4.90 dB  
PL1W 3.30822015 W  
SFO1 400.1324710 MHz

F2 - Processing parameters  
SI 32768  
SF 400.1300000 MHz  
WDW EM  
SSB 0  
LB 0.30 Hz  
GB 0  
PC 1.00

### Compound 34, racemic

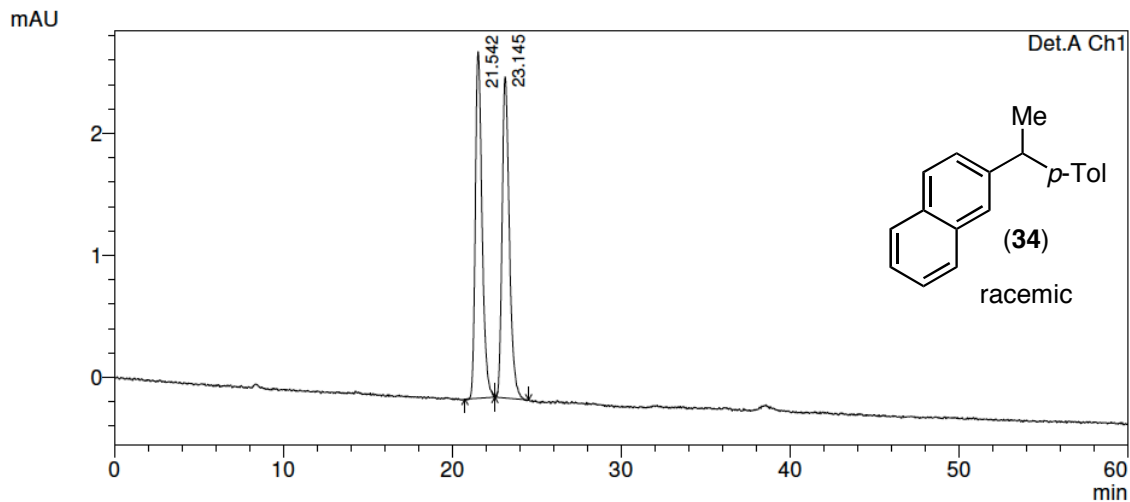

Detector A Ch1 254nm

| Peak# | Ret. Time | Area   | Height | Area %  | Height % |
|-------|-----------|--------|--------|---------|----------|
| 1     | 21.542    | 78839  | 2843   | 50.033  | 51.898   |
| 2     | 23.145    | 78735  | 2635   | 49.967  | 48.102   |
| Total |           | 157574 | 5478   | 100.000 | 100.000  |

### Compound 34, enantioenriched

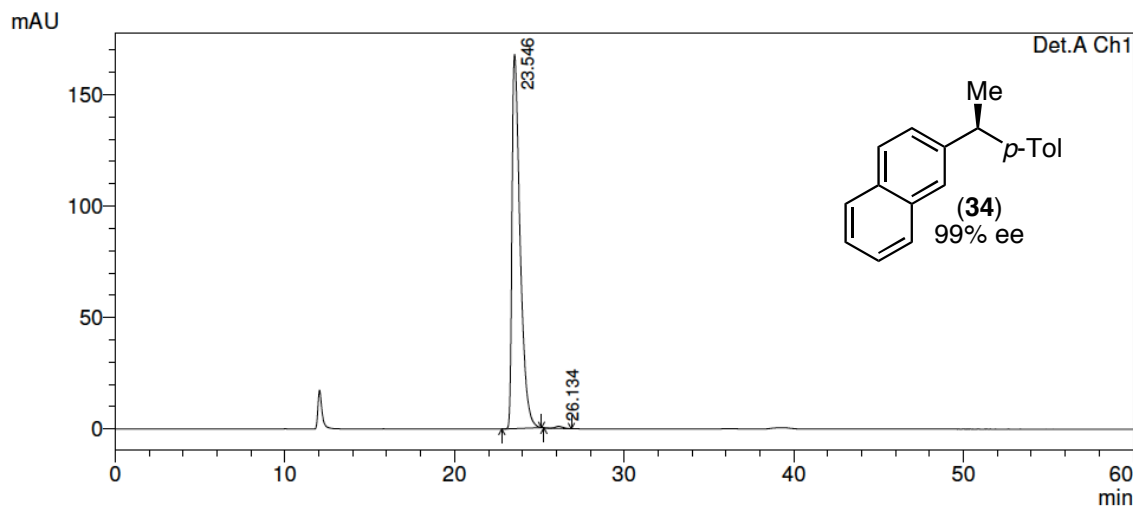

Detector A Ch1 254nm

| Peak# | Ret. Time | Area    | Height | Area %  | Height % |
|-------|-----------|---------|--------|---------|----------|
| 1     | 23.546    | 5566610 | 167841 | 99.555  | 99.426   |
| 2     | 26.134    | 24902   | 968    | 0.445   | 0.574    |
| Total |           | 5591512 | 168810 | 100.000 | 100.000  |

### Compound 35, racemic

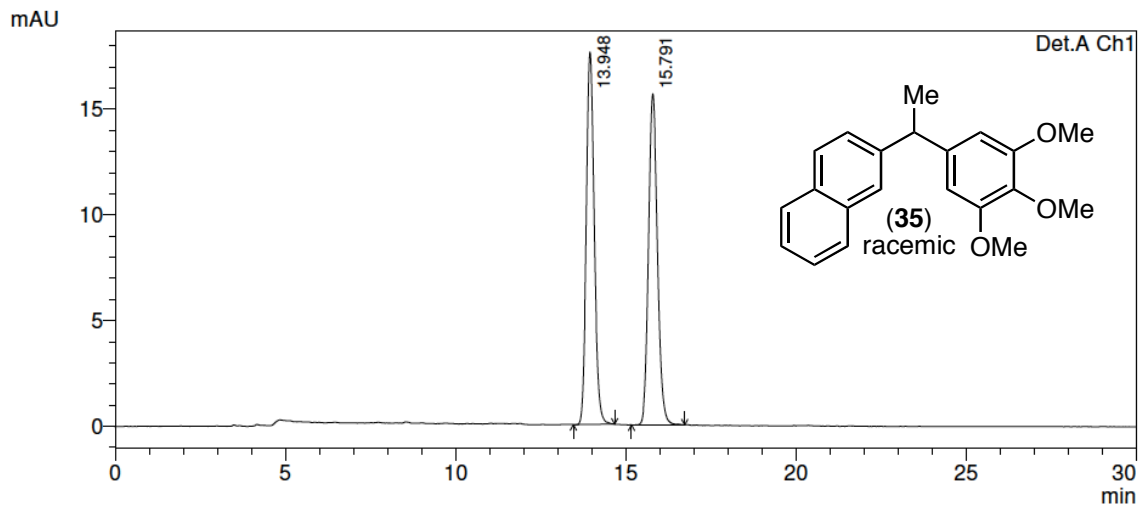

Detector A Ch1 254nm

| Peak# | Ret. Time | Area   | Height | Area %  | Height % |
|-------|-----------|--------|--------|---------|----------|
| 1     | 13.948    | 285216 | 17625  | 49.867  | 52.956   |
| 2     | 15.791    | 286735 | 15657  | 50.133  | 47.044   |
| Total |           | 571950 | 33282  | 100.000 | 100.000  |

### Compound 35, enantioenriched

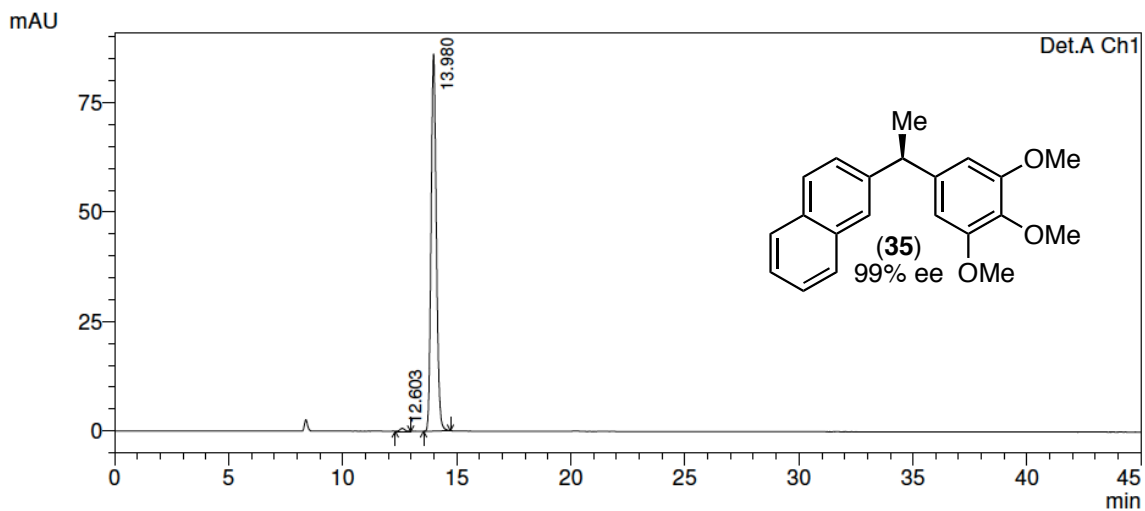

Detector A Ch1 254nm

| Peak# | Ret. Time | Area    | Height | Area %  | Height % |
|-------|-----------|---------|--------|---------|----------|
| 1     | 12.603    | 9624    | 673    | 0.691   | 0.776    |
| 2     | 13.980    | 1383627 | 86096  | 99.309  | 99.224   |
| Total |           | 1393251 | 86769  | 100.000 | 100.000  |

### Compound 36, racemic

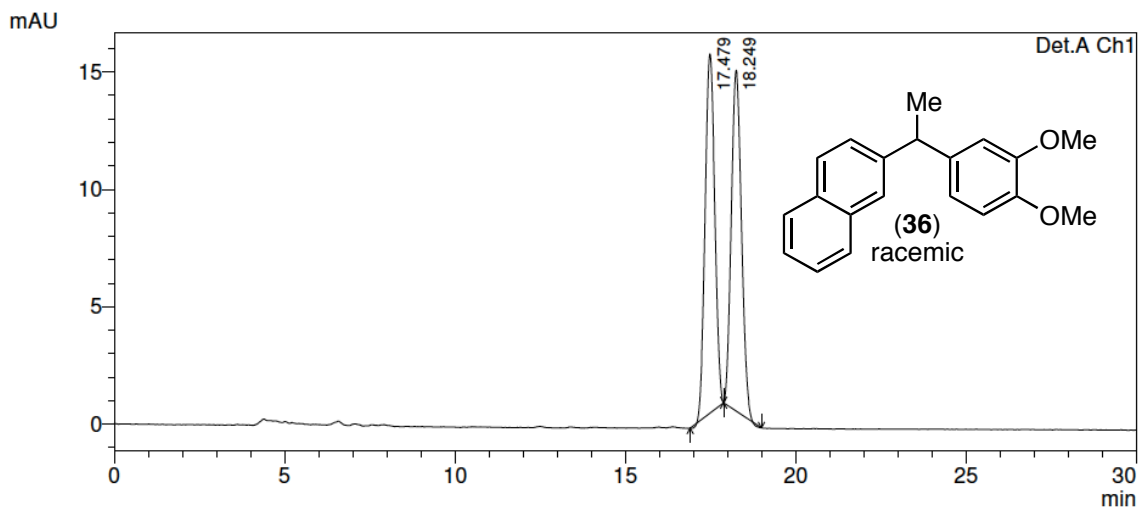

Detector A Ch1 254nm

| Peak# | Ret. Time | Area   | Height | Area %  | Height % |
|-------|-----------|--------|--------|---------|----------|
| 1     | 17.479    | 302437 | 15327  | 50.083  | 51.327   |
| 2     | 18.249    | 301434 | 14534  | 49.917  | 48.673   |
| Total |           | 603871 | 29861  | 100.000 | 100.000  |

### Compound 36, enantioenriched

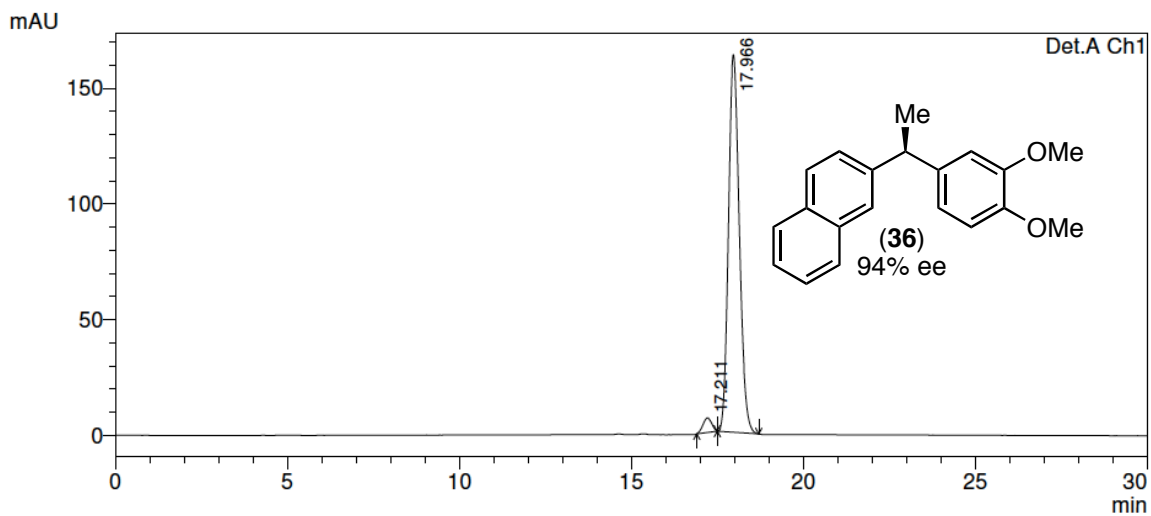

Detector A Ch1 254nm

| Peak# | Ret. Time | Area    | Height | Area %  | Height % |
|-------|-----------|---------|--------|---------|----------|
| 1     | 17.211    | 109447  | 6268   | 2.965   | 3.698    |
| 2     | 17.966    | 3582462 | 163249 | 97.035  | 96.302   |
| Total |           | 3691909 | 169517 | 100.000 | 100.000  |

### Compound 37, racemic

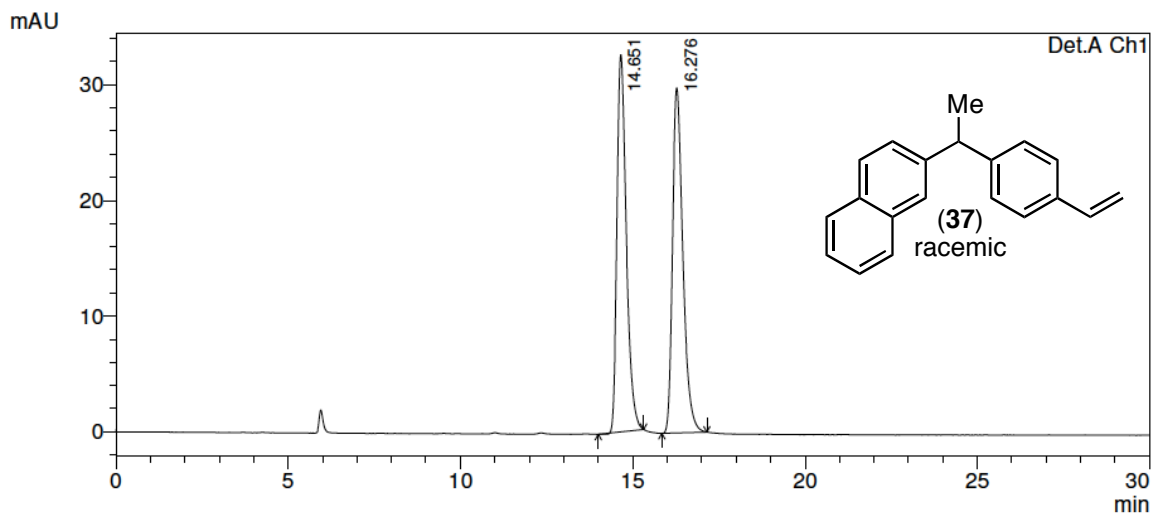

Detector A Ch1 254nm

| Peak# | Ret. Time | Area    | Height | Area %  | Height % |
|-------|-----------|---------|--------|---------|----------|
| 1     | 14.651    | 613434  | 32600  | 49.600  | 52.224   |
| 2     | 16.276    | 623336  | 29824  | 50.400  | 47.776   |
| Total |           | 1236770 | 62424  | 100.000 | 100.000  |

### Compound 37, enantioenriched

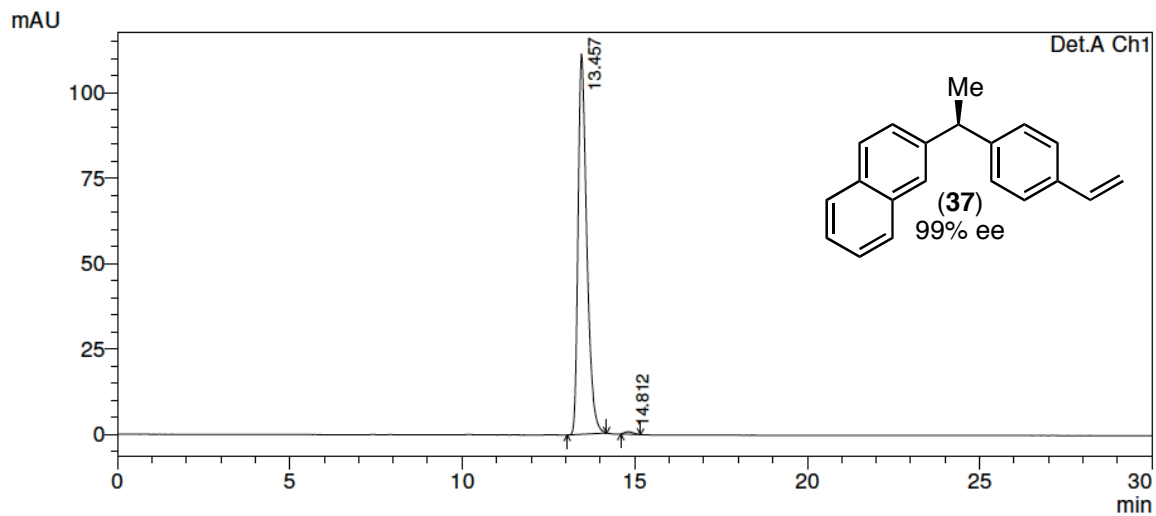

Detector A Ch1 254nm

| Peak# | Ret. Time | Area    | Height | Area %  | Height % |
|-------|-----------|---------|--------|---------|----------|
| 1     | 13.457    | 1974070 | 111453 | 99.363  | 99.316   |
| 2     | 14.812    | 12651   | 768    | 0.637   | 0.684    |
| Total |           | 1986720 | 112220 | 100.000 | 100.000  |

## Compound 38, racemic

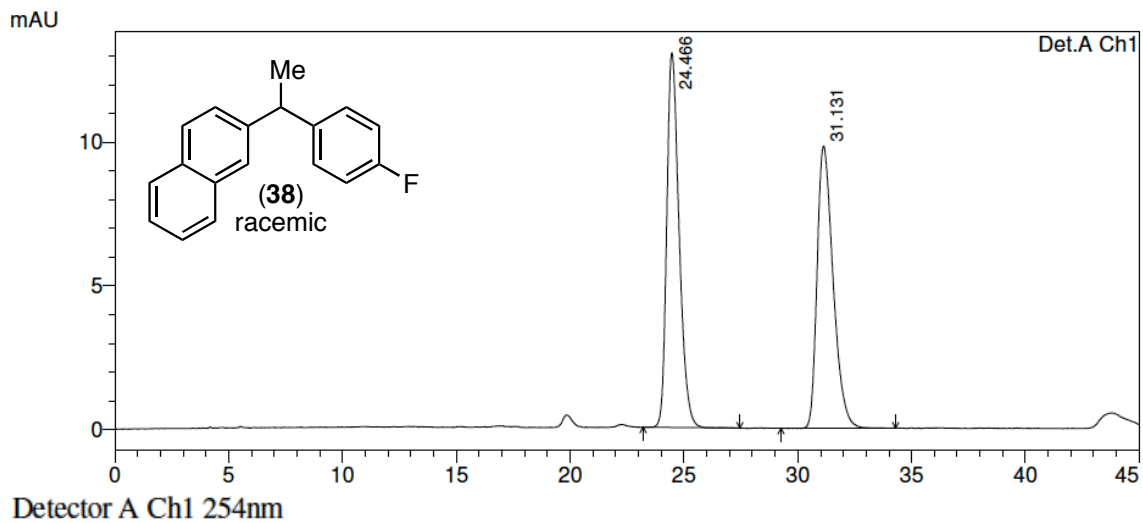

| Peak# | Ret. Time | Area   | Height | Area %  | Height % |
|-------|-----------|--------|--------|---------|----------|
| 1     | 24.466    | 492703 | 13047  | 50.652  | 57.061   |
| 2     | 31.131    | 480018 | 9818   | 49.348  | 42.939   |
| Total |           | 972721 | 22865  | 100.000 | 100.000  |

## Compound (S)-38, enantioenriched

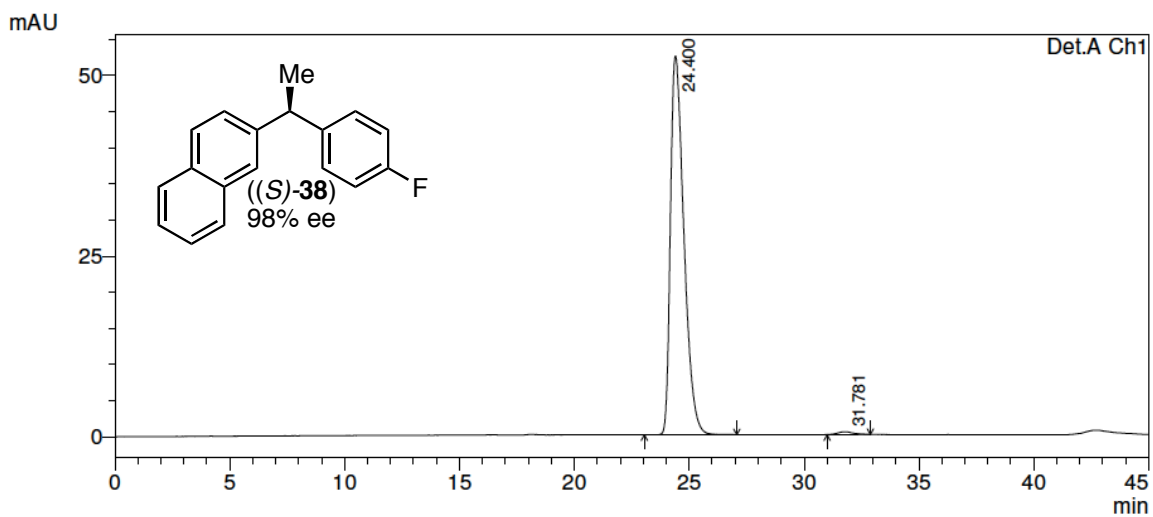

| Peak# | Ret. Time | Area    | Height | Area %  | Height % |
|-------|-----------|---------|--------|---------|----------|
| 1     | 24.400    | 2134769 | 52398  | 99.141  | 99.241   |
| 2     | 31.781    | 18499   | 401    | 0.859   | 0.759    |
| Total |           | 2153267 | 52798  | 100.000 | 100.000  |



### Compound 39, racemic

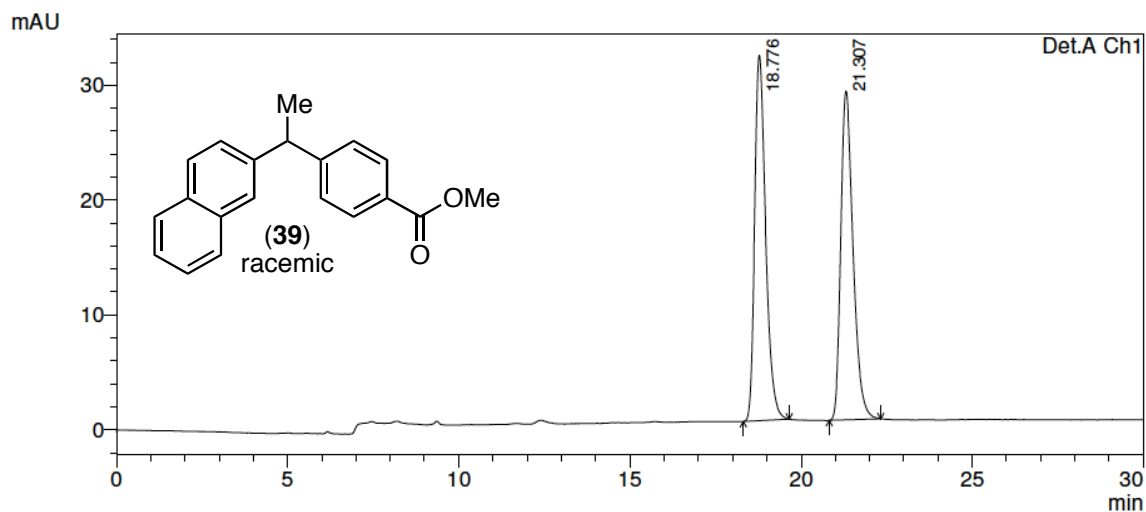

Detector A Ch1 254nm

| Peak# | Ret. Time | Area    | Height | Area %  | Height % |
|-------|-----------|---------|--------|---------|----------|
| 1     | 18.776    | 710130  | 31808  | 49.943  | 52.627   |
| 2     | 21.307    | 711755  | 28632  | 50.057  | 47.373   |
| Total |           | 1421885 | 60439  | 100.000 | 100.000  |

### Compound 39, enantioenriched

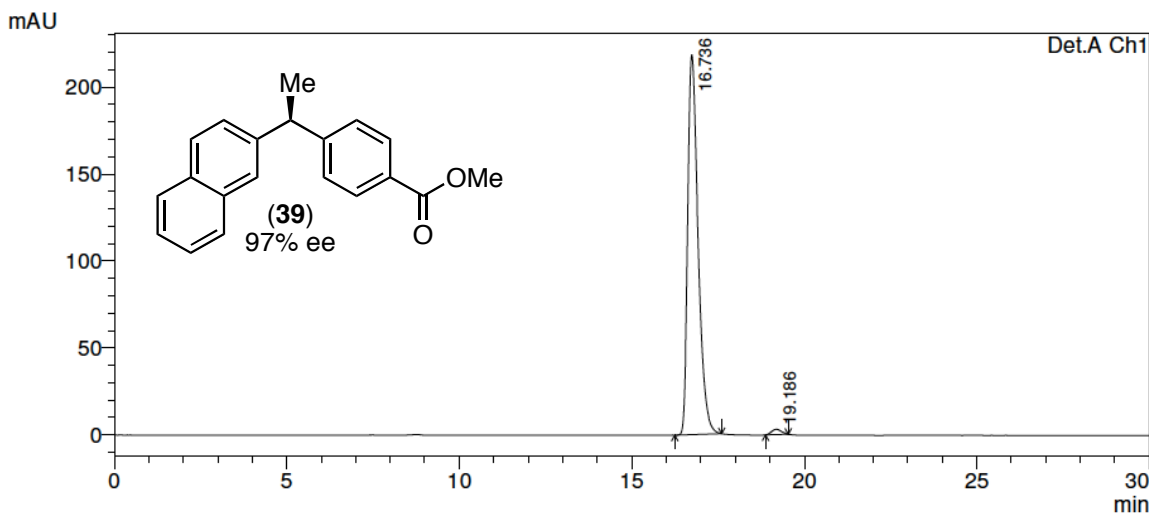

Detector A Ch1 254nm

| Peak# | Ret. Time | Area    | Height | Area %  | Height % |
|-------|-----------|---------|--------|---------|----------|
| 1     | 16.736    | 4554335 | 218340 | 98.733  | 98.654   |
| 2     | 19.186    | 58440   | 2979   | 1.267   | 1.346    |
| Total |           | 4612775 | 221319 | 100.000 | 100.000  |

### Compound 40, racemic

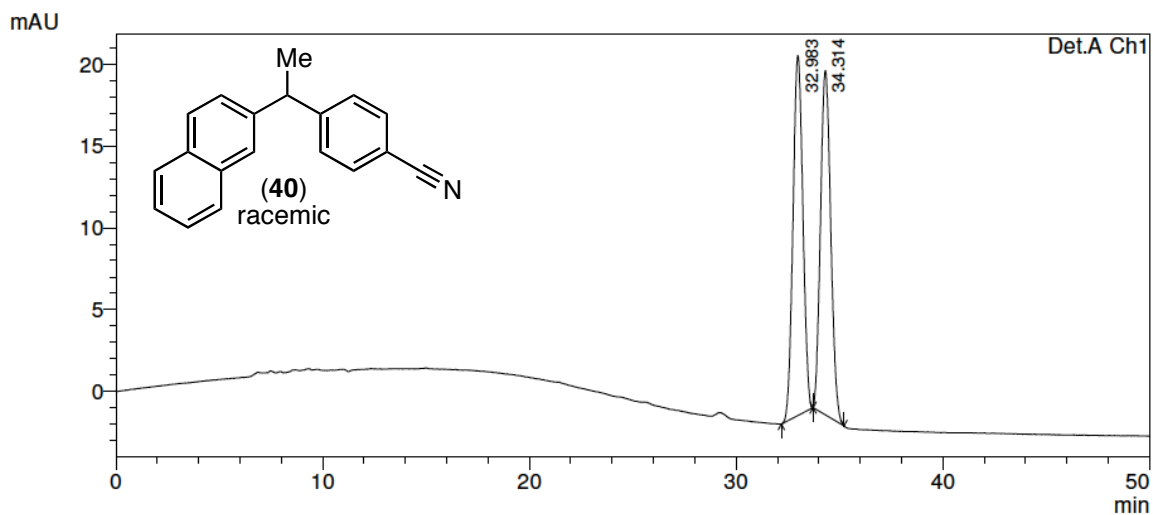

Detector A Ch1 254nm

| Peak# | Ret. Time | Area    | Height | Area %  | Height % |
|-------|-----------|---------|--------|---------|----------|
| 1     | 32.983    | 730166  | 22010  | 50.195  | 51.100   |
| 2     | 34.314    | 724491  | 21062  | 49.805  | 48.900   |
| Total |           | 1454656 | 43072  | 100.000 | 100.000  |

### Compound 40, enantioenriched

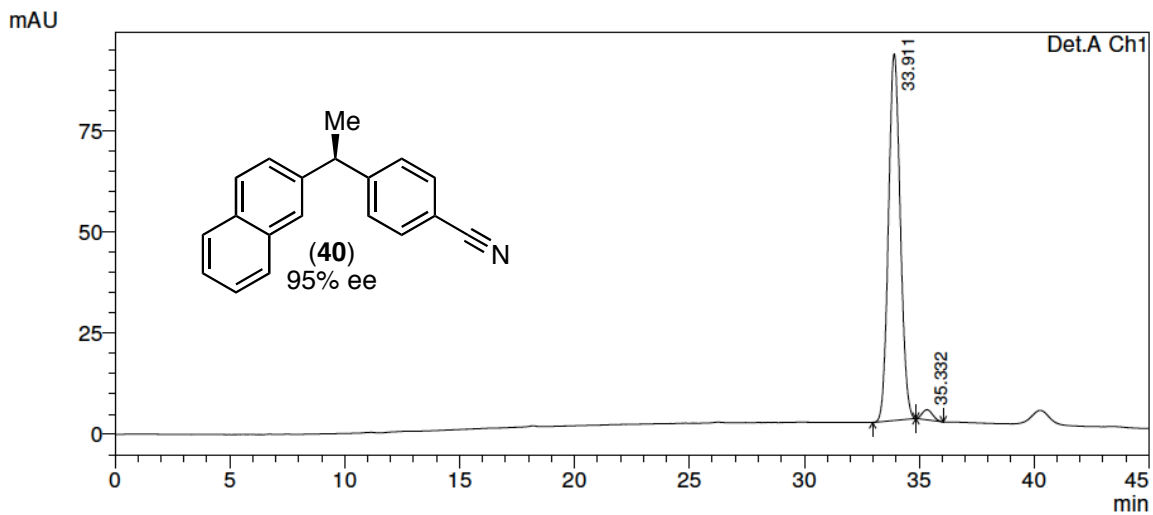

Detector A Ch1 254nm

| Peak# | Ret. Time | Area    | Height | Area %  | Height % |
|-------|-----------|---------|--------|---------|----------|
| 1     | 33.911    | 3237525 | 90626  | 97.585  | 97.294   |
| 2     | 35.332    | 80119   | 2521   | 2.415   | 2.706    |
| Total |           | 3317644 | 93147  | 100.000 | 100.000  |

### Compound 41, racemic

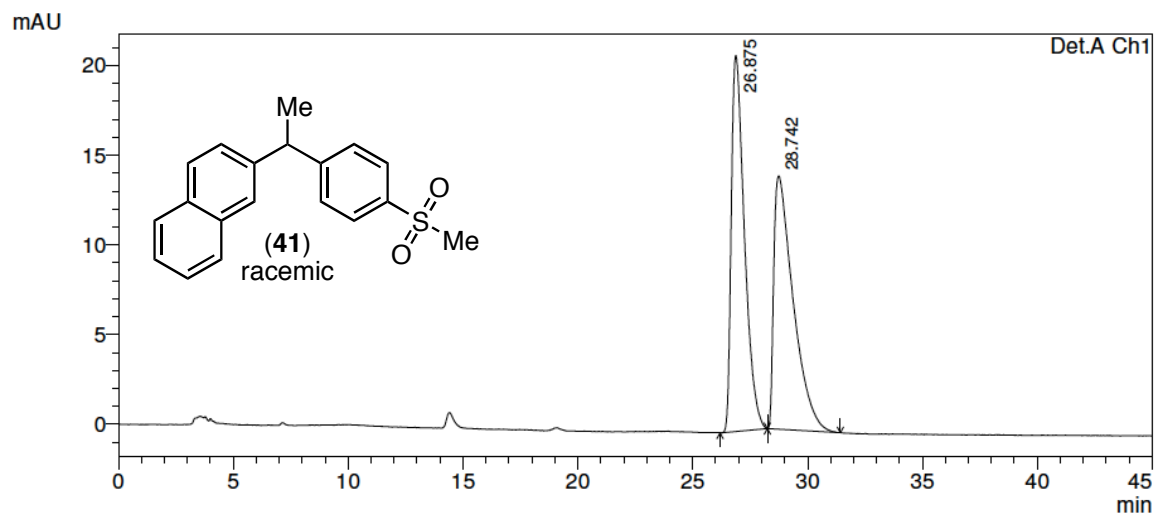

Detector A Ch1 254nm

| Peak# | Ret. Time | Area    | Height | Area %  | Height % |
|-------|-----------|---------|--------|---------|----------|
| 1     | 26.875    | 834248  | 20960  | 50.169  | 59.752   |
| 2     | 28.742    | 828620  | 14118  | 49.831  | 40.248   |
| Total |           | 1662868 | 35078  | 100.000 | 100.000  |

### Compound 41, enantioenriched

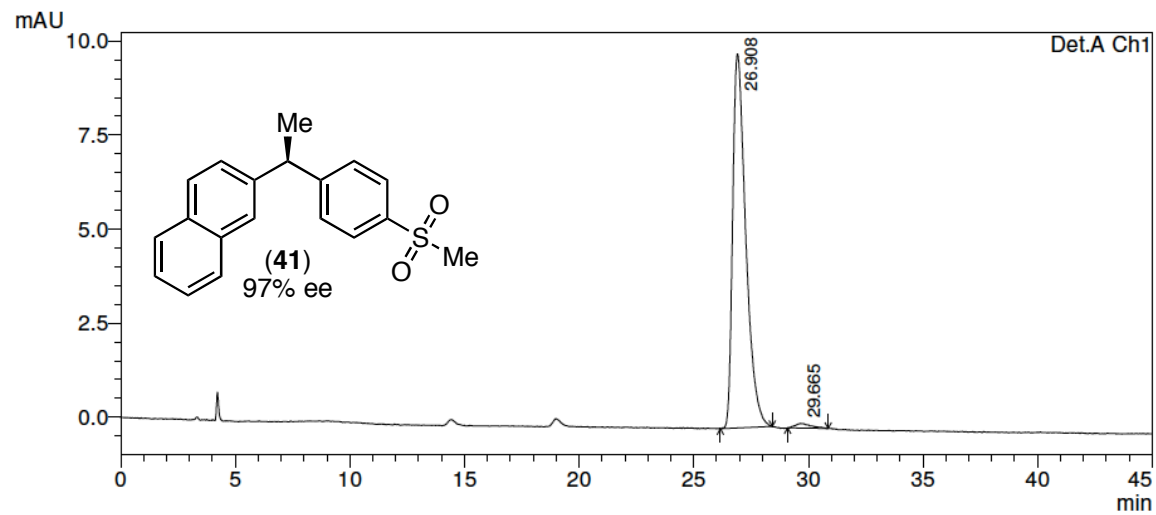

Detector A Ch1 254nm

| Peak# | Ret. Time | Area   | Height | Area %  | Height % |
|-------|-----------|--------|--------|---------|----------|
| 1     | 26.908    | 394994 | 9940   | 98.526  | 98.737   |
| 2     | 29.665    | 5908   | 127    | 1.474   | 1.263    |
| Total |           | 400903 | 10067  | 100.000 | 100.000  |

### Compound 42, racemic

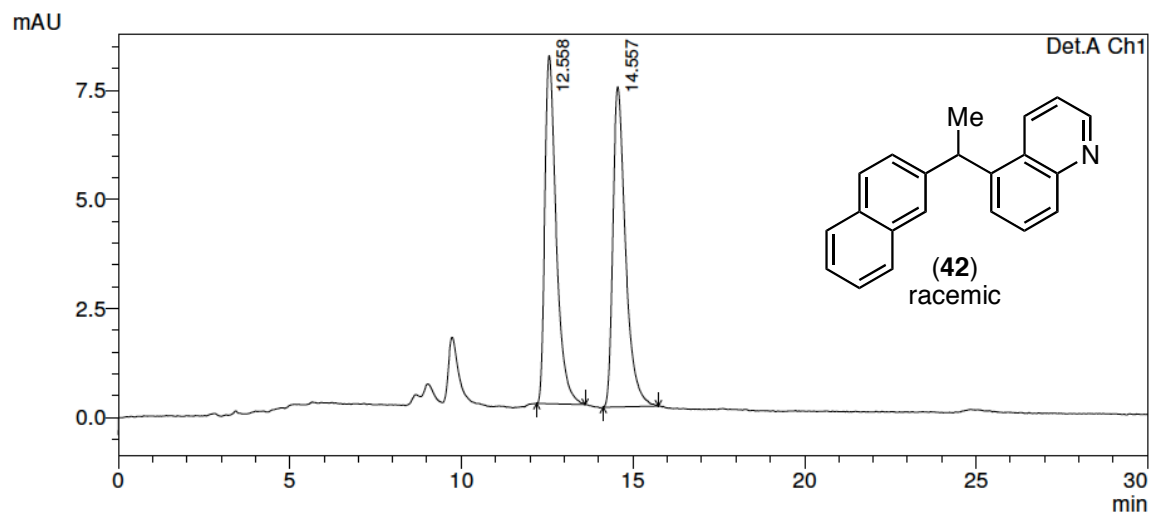

Detector A Ch1 254nm

| Peak# | Ret. Time | Area   | Height | Area %  | Height % |
|-------|-----------|--------|--------|---------|----------|
| 1     | 12.558    | 184602 | 7985   | 49.489  | 52.083   |
| 2     | 14.557    | 188417 | 7346   | 50.511  | 47.917   |
| Total |           | 373020 | 15331  | 100.000 | 100.000  |

### Compound 42, enantioenriched

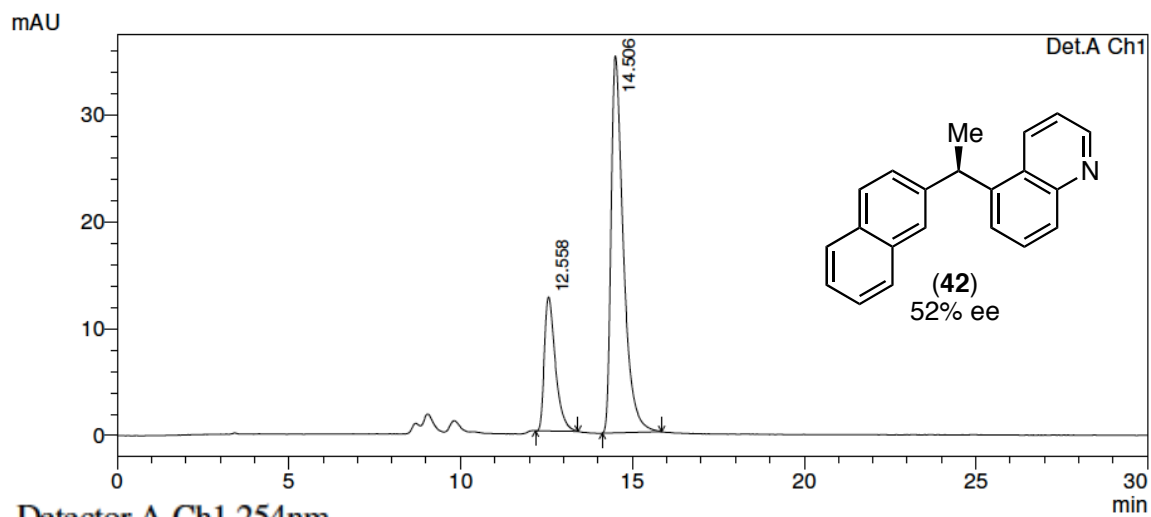

Detector A Ch1 254nm

| Peak# | Ret. Time | Area    | Height | Area %  | Height % |
|-------|-----------|---------|--------|---------|----------|
| 1     | 12.558    | 279764  | 12542  | 24.105  | 26.230   |
| 2     | 14.506    | 880842  | 35272  | 75.895  | 73.770   |
| Total |           | 1160606 | 47814  | 100.000 | 100.000  |

### Compound 43, racemic

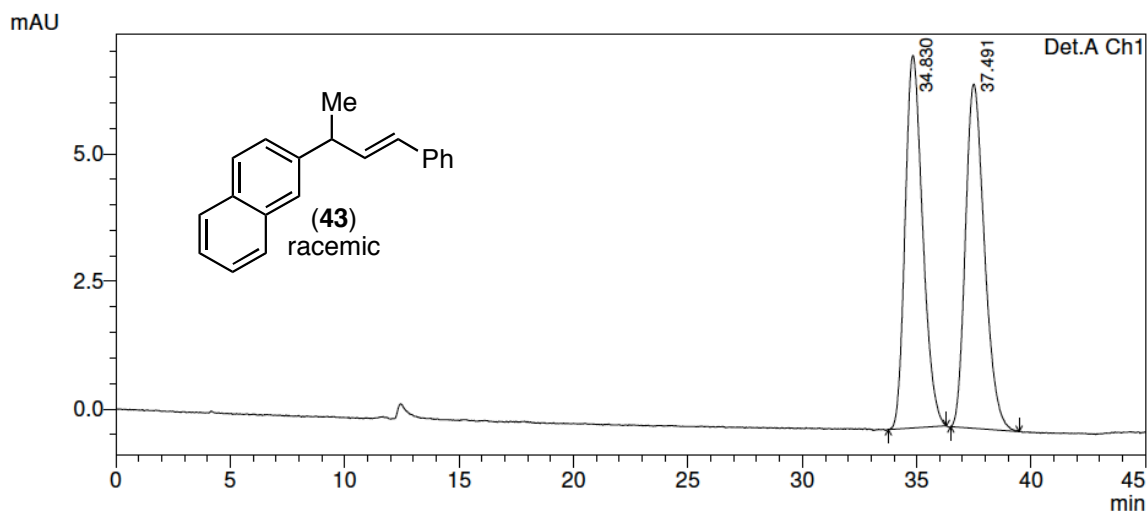

Detector A Ch1 254nm

| Peak# | Ret. Time | Area   | Height | Area %  | Height % |
|-------|-----------|--------|--------|---------|----------|
| 1     | 34.830    | 389304 | 7298   | 49.955  | 51.983   |
| 2     | 37.491    | 390003 | 6741   | 50.045  | 48.017   |
| Total |           | 779307 | 14038  | 100.000 | 100.000  |

### Compound 43, enantioenriched

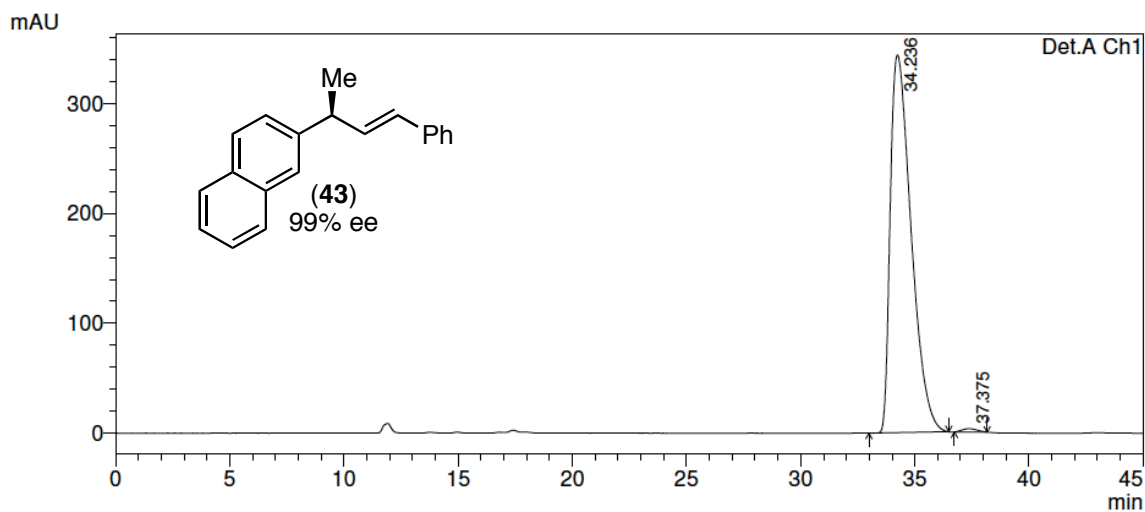

Detector A Ch1 254nm

| Peak# | Ret. Time | Area     | Height | Area %  | Height % |
|-------|-----------|----------|--------|---------|----------|
| 1     | 34.236    | 21826981 | 343641 | 99.373  | 99.144   |
| 2     | 37.375    | 137641   | 2967   | 0.627   | 0.856    |
| Total |           | 21964622 | 346608 | 100.000 | 100.000  |

### Compound 44, racemic

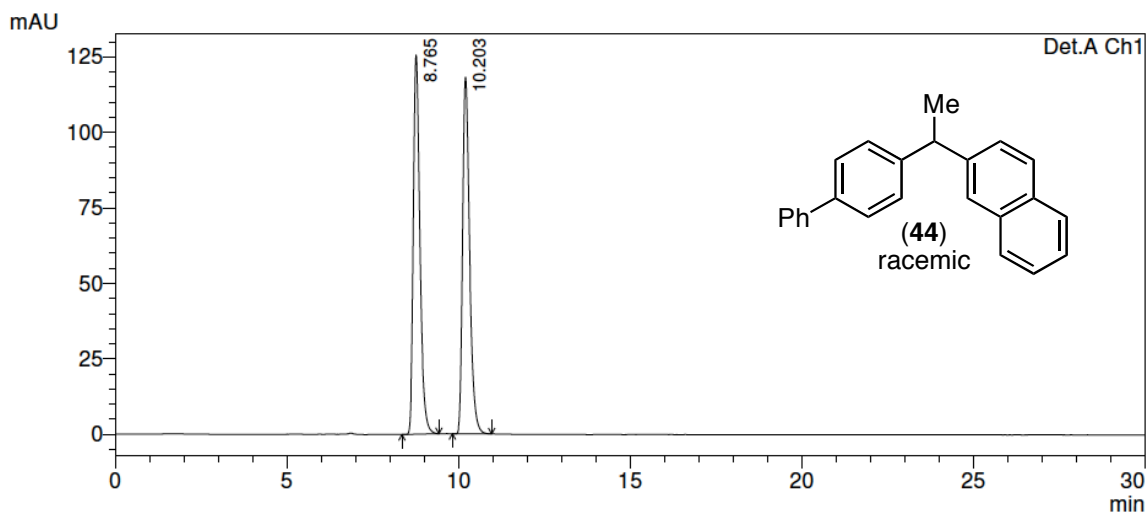

Detector A Ch1 254nm

| Peak# | Ret. Time | Area    | Height | Area %  | Height % |
|-------|-----------|---------|--------|---------|----------|
| 1     | 8.765     | 1662393 | 125567 | 49.963  | 51.518   |
| 2     | 10.203    | 1664847 | 118166 | 50.037  | 48.482   |
| Total |           | 3327239 | 243733 | 100.000 | 100.000  |

### Compound 44, enantioenriched

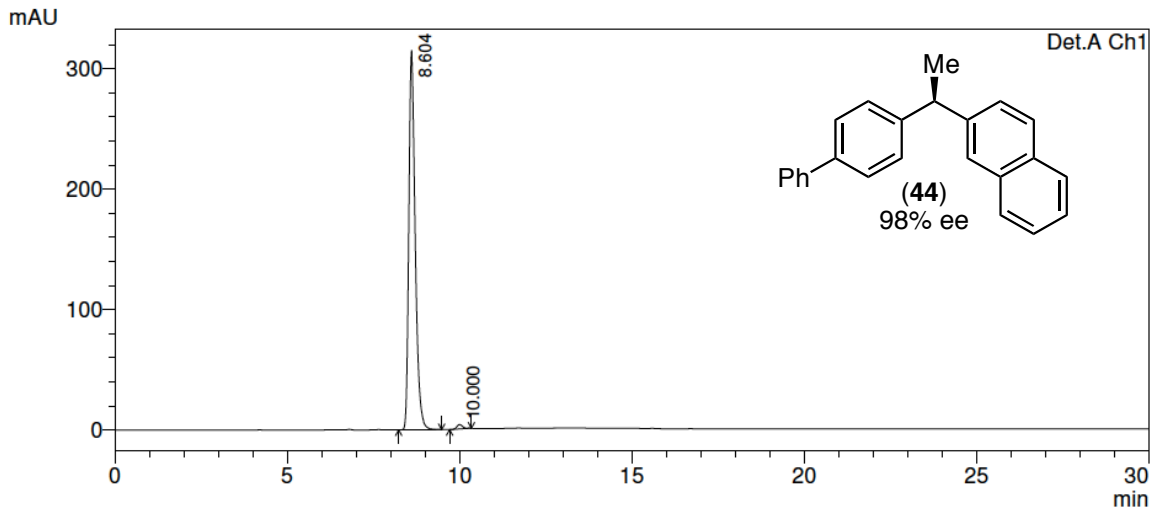

Detector A Ch1 254nm

| Peak# | Ret. Time | Area    | Height | Area %  | Height % |
|-------|-----------|---------|--------|---------|----------|
| 1     | 8.604     | 4111465 | 314829 | 98.933  | 98.839   |
| 2     | 10.000    | 44336   | 3697   | 1.067   | 1.161    |
| Total |           | 4155800 | 318526 | 100.000 | 100.000  |

### Compound 38, racemic

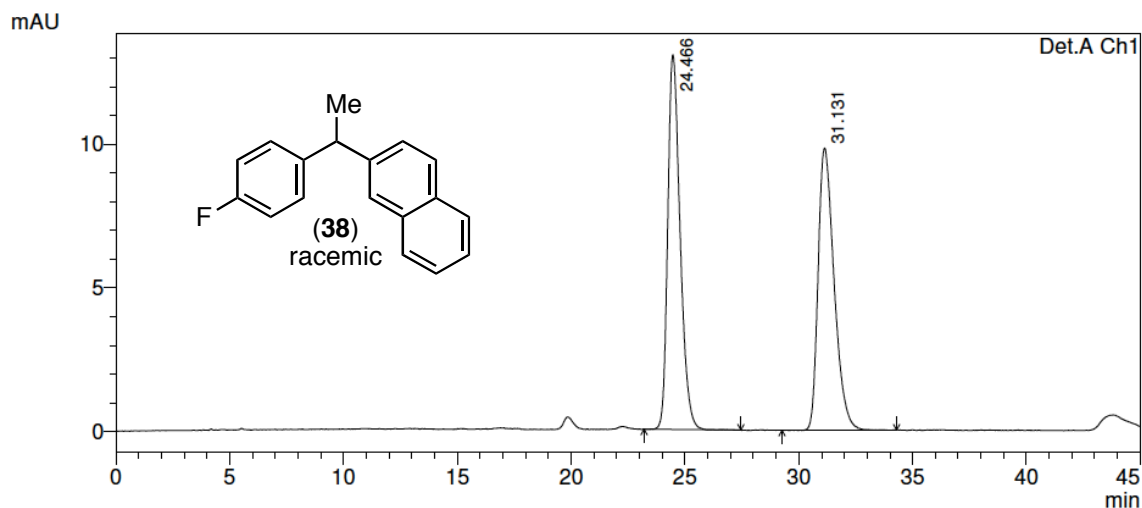

Detector A Ch1 254nm

| Peak# | Ret. Time | Area   | Height | Area %  | Height % |
|-------|-----------|--------|--------|---------|----------|
| 1     | 24.466    | 492703 | 13047  | 50.652  | 57.061   |
| 2     | 31.131    | 480018 | 9818   | 49.348  | 42.939   |
| Total |           | 972721 | 22865  | 100.000 | 100.000  |

### Compound (R)-38, enantioenriched

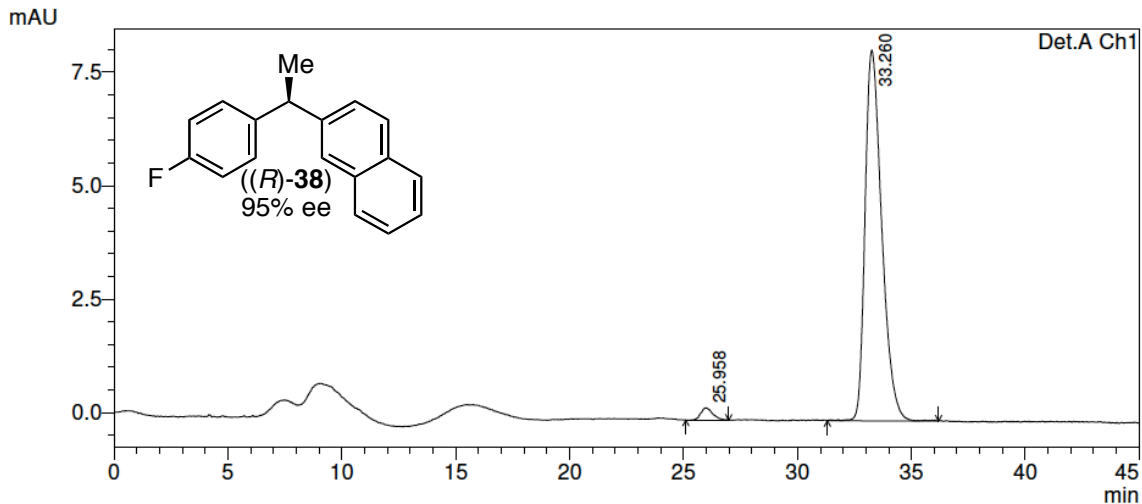

Detector A Ch1 254nm

| Peak# | Ret. Time | Area   | Height | Area %  | Height % |
|-------|-----------|--------|--------|---------|----------|
| 1     | 25.958    | 10035  | 269    | 2.358   | 3.194    |
| 2     | 33.260    | 415574 | 8167   | 97.642  | 96.806   |
| Total |           | 425609 | 8436   | 100.000 | 100.000  |

### Compound 45, racemic

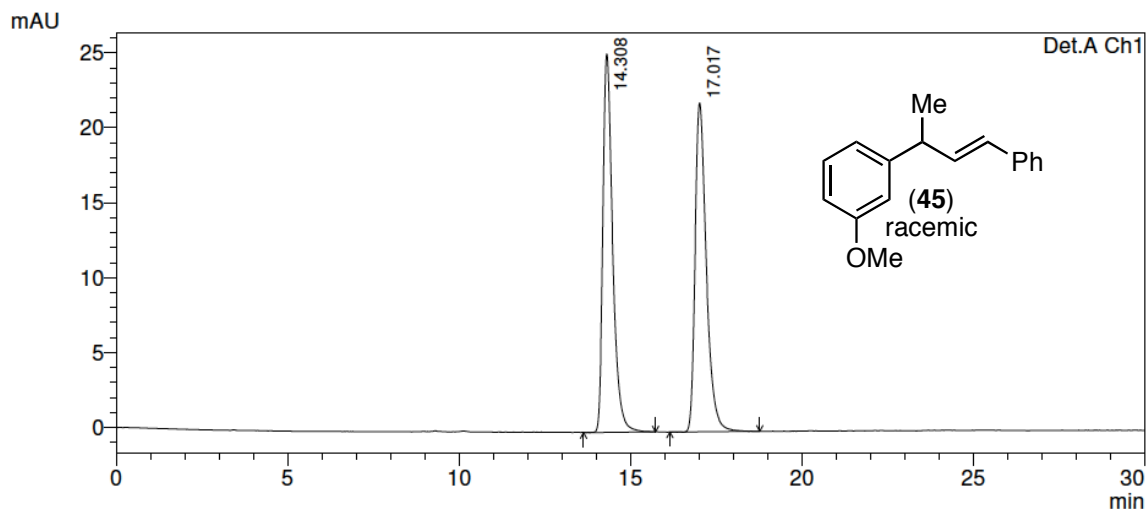

Detector A Ch1 254nm

| Peak# | Ret. Time | Area   | Height | Area %  | Height % |
|-------|-----------|--------|--------|---------|----------|
| 1     | 14.308    | 499610 | 25230  | 50.047  | 53.498   |
| 2     | 17.017    | 498666 | 21930  | 49.953  | 46.502   |
| Total |           | 998275 | 47160  | 100.000 | 100.000  |

### Compound 45, enantioenriched

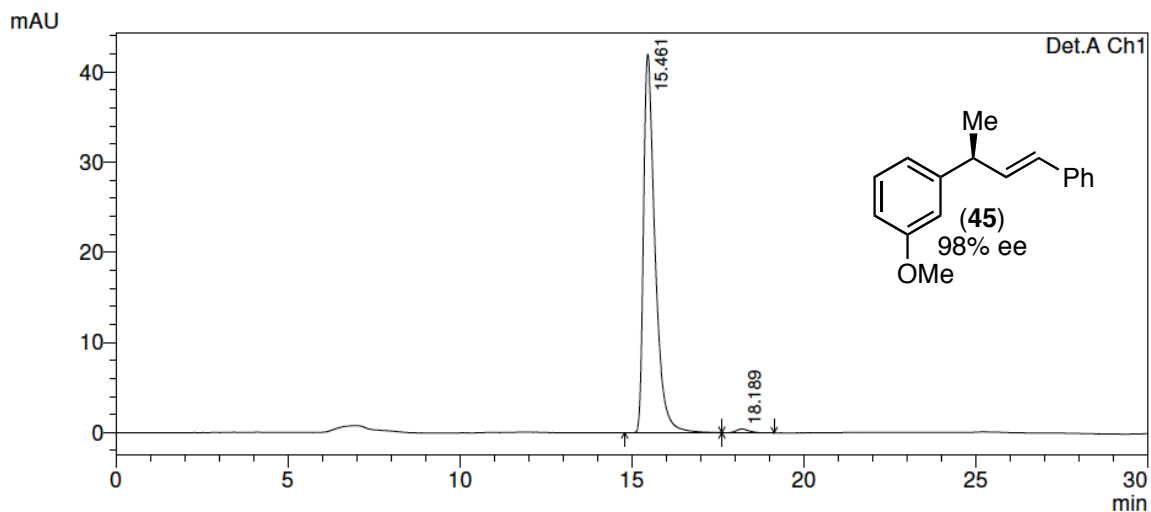

Detector A Ch1 254nm

| Peak# | Ret. Time | Area   | Height | Area %  | Height % |
|-------|-----------|--------|--------|---------|----------|
| 1     | 15.461    | 976356 | 41973  | 98.985  | 99.093   |
| 2     | 18.189    | 10007  | 384    | 1.015   | 0.907    |
| Total |           | 986363 | 42357  | 100.000 | 100.000  |



### Compound 46, racemic

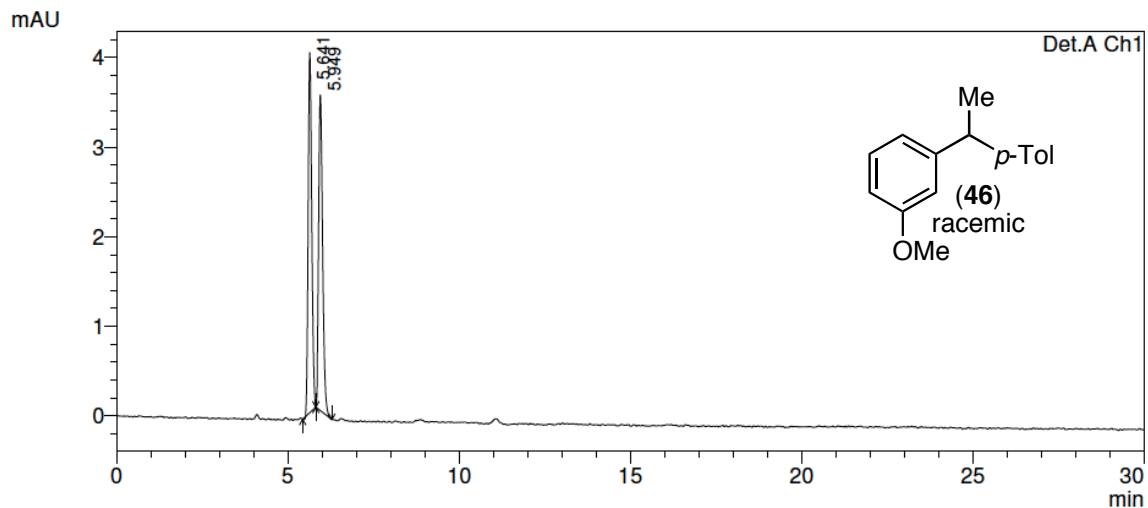

Detector A Ch1 254nm

| Peak# | Ret. Time | Area  | Height | Area %  | Height % |
|-------|-----------|-------|--------|---------|----------|
| 1     | 5.641     | 28336 | 4020   | 50.186  | 53.282   |
| 2     | 5.949     | 28127 | 3525   | 49.814  | 46.718   |
| Total |           | 56463 | 7545   | 100.000 | 100.000  |

### Compound 46, enantioenriched

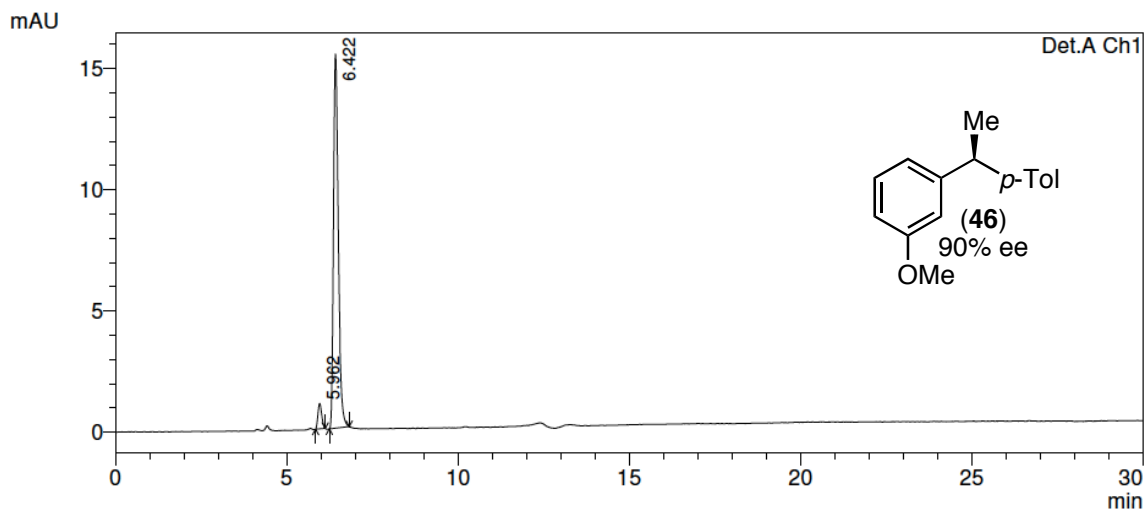

Detector A Ch1 254nm

| Peak# | Ret. Time | Area   | Height | Area %  | Height % |
|-------|-----------|--------|--------|---------|----------|
| 1     | 5.962     | 7825   | 1055   | 4.985   | 6.402    |
| 2     | 6.422     | 149147 | 15426  | 95.015  | 93.598   |
| Total |           | 156972 | 16481  | 100.000 | 100.000  |

### Compound 50, racemic

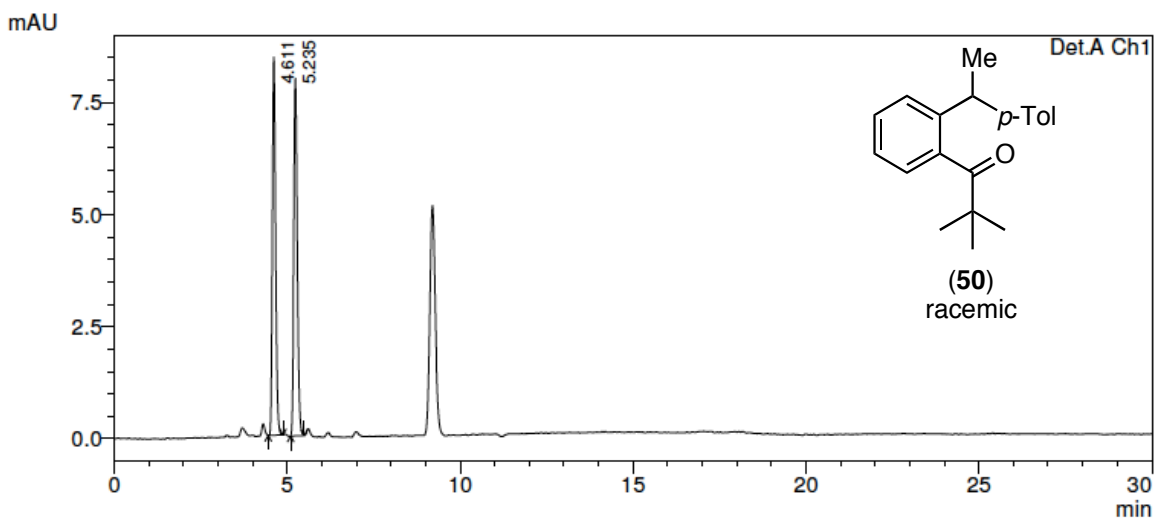

### Compound 50, enantioenriched

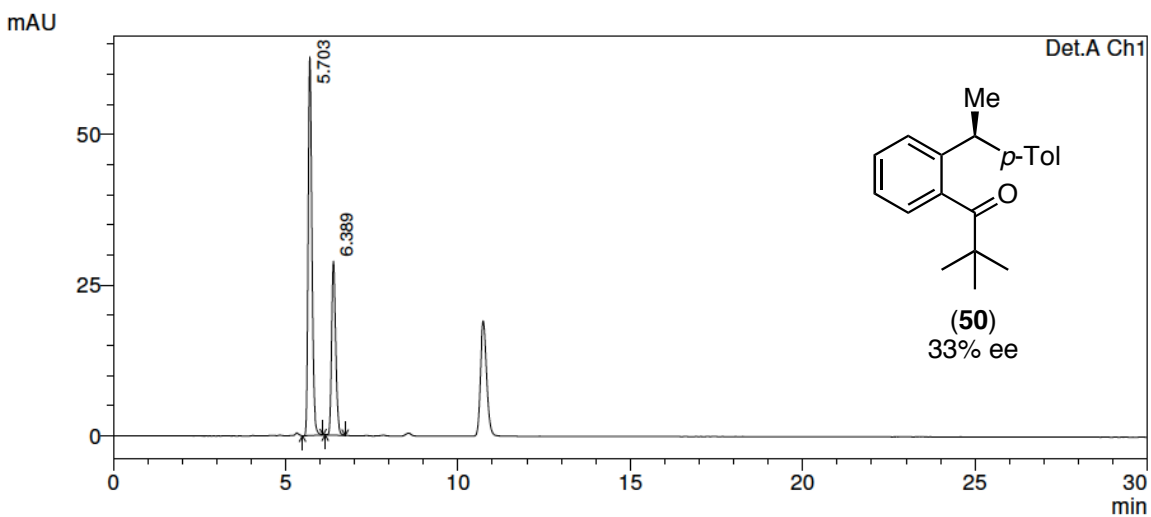

| Peak# | Ret. Time | Area   | Height | Area %  | Height % |
|-------|-----------|--------|--------|---------|----------|
| 1     | 5.703     | 469993 | 62856  | 66.765  | 68.521   |
| 2     | 6.389     | 233958 | 28876  | 33.235  | 31.479   |
| Total |           | 703952 | 91732  | 100.000 | 100.000  |

### Compound S1, racemic

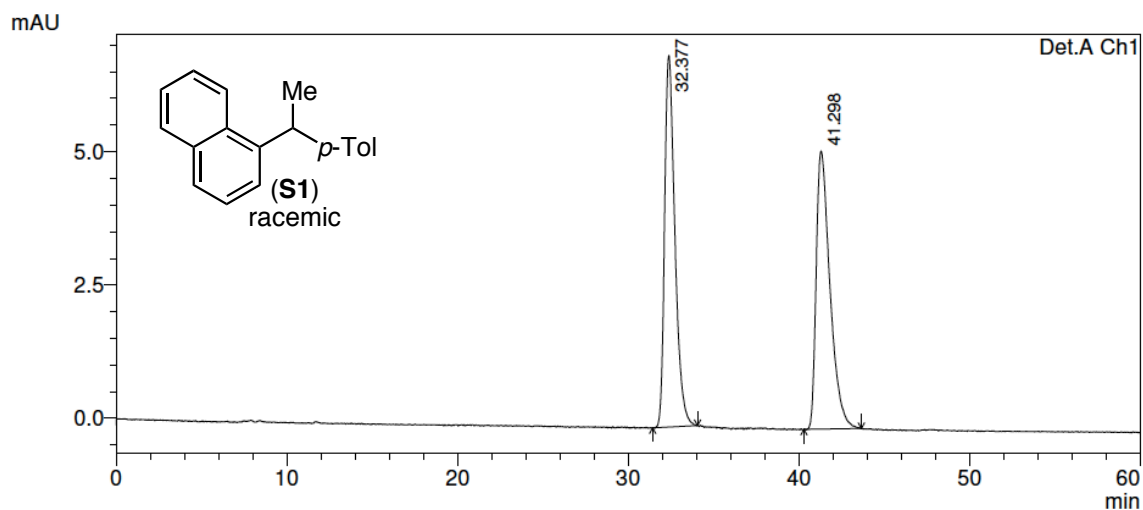

Detector A Ch1 254nm

| Peak# | Ret. Time | Area   | Height | Area %  | Height % |
|-------|-----------|--------|--------|---------|----------|
| 1     | 32.377    | 291855 | 6966   | 49.978  | 57.194   |
| 2     | 41.298    | 292111 | 5214   | 50.022  | 42.806   |
| Total |           | 583967 | 12180  | 100.000 | 100.000  |

### Compound S1, enantioenriched

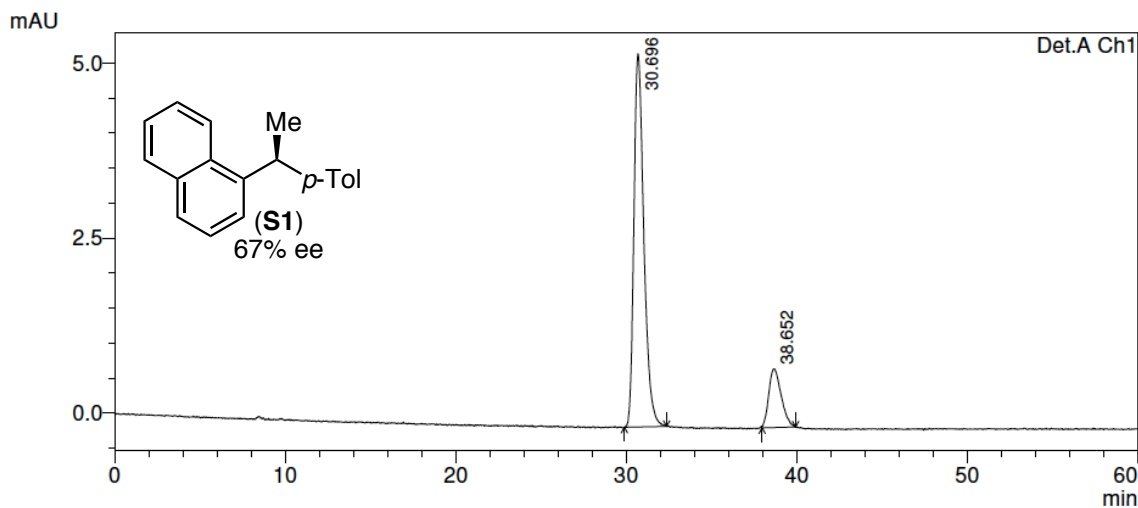

Detector A Ch1 254nm

| Peak# | Ret. Time | Area   | Height | Area %  | Height % |
|-------|-----------|--------|--------|---------|----------|
| 1     | 30.696    | 215910 | 5328   | 83.499  | 86.431   |
| 2     | 38.652    | 42669  | 837    | 16.501  | 13.569   |
| Total |           | 258579 | 6165   | 100.000 | 100.000  |

## Crystal Structure Report for **48** & (*R*)-**38**

The frames were integrated with the Bruker SAINT software package using a narrow-frame algorithm. Data were corrected for absorption effects using numerical methods based on indexed crystal faces.

No symmetry higher than triclinic was observed for **48** and solution in the centrosymmetric space group option yielded chemically reasonable and computationally stable results of refinement. The systematic absences in the diffraction data were consistent with  $P2_1$  and  $P2_1/m$  for (*R*)-**38**. The resolved chirality of the target compound for (*R*)-**38** is consistent with the noncentrosymmetric space group option and refinement in  $P2_1$  yielded a nil absolute structure parameter indicating the true hand of the data has been determined. Two symmetry unique but chemically identical molecules of the target molecule are observed in the asymmetric unit for (*R*)-**38**. All nonhydrogen atoms were refined with anisotropic displacement parameters. Hydrogen atoms were treated as idealized contributions. The structures were solved and refined using the Bruker SHELXTL Software Package (Sheldrick, G.M. 2008. Acta Cryst. A64, 112-122). CIFs are deposited with the CSD under depositary numbers 899359 (**48**) & 899360 ((*R*)-**38**).

**Table 1. Sample and crystal data for **48**.**

|                             |                               |                             |
|-----------------------------|-------------------------------|-----------------------------|
| <b>Identification code</b>  | 43                            |                             |
| <b>Chemical formula</b>     | $C_{31}H_{36}F_3NiO_4PS$      |                             |
| <b>Formula weight</b>       | 651.34                        |                             |
| <b>Temperature</b>          | 200(2) K                      |                             |
| <b>Wavelength</b>           | 0.71073 Å                     |                             |
| <b>Crystal size</b>         | 0.180 x 0.210 x 0.220 mm      |                             |
| <b>Crystal system</b>       | triclinic                     |                             |
| <b>Space group</b>          | $P -1$                        |                             |
| <b>Unit cell dimensions</b> | $a = 10.3072(18) \text{ \AA}$ | $\alpha = 109.485(3)^\circ$ |
|                             | $b = 11.549(2) \text{ \AA}$   | $\beta = 93.164(3)^\circ$   |
|                             | $c = 15.755(3) \text{ \AA}$   | $\gamma = 112.720(3)^\circ$ |
| <b>Volume</b>               | $1593.9(5) \text{ \AA}^3$     |                             |

|                               |                         |
|-------------------------------|-------------------------|
| <b>Z</b>                      | 2                       |
| <b>Density (calculated)</b>   | 1.357 g/cm <sup>3</sup> |
| <b>Absorption coefficient</b> | 0.775 mm <sup>-1</sup>  |
| <b>F(000)</b>                 | 680                     |

---

**Table 2. Data collection and structure refinement for 48.**

|                                            |                                               |                           |
|--------------------------------------------|-----------------------------------------------|---------------------------|
| <b>Theta range for data collection</b>     | 2.01 to 27.51°                                |                           |
| <b>Index ranges</b>                        | -13<=h<=13, -14<=k<=14, -20<=l<=20            |                           |
| <b>Reflections collected</b>               | 20891                                         |                           |
| <b>Independent reflections</b>             | 7291 [R(int) = 0.0437]                        |                           |
| <b>Coverage of independent reflections</b> | 99.6%                                         |                           |
| <b>Absorption correction</b>               | numerical                                     |                           |
| <b>Max. and min. transmission</b>          | 0.8757 and 0.8450                             |                           |
| <b>Structure solution technique</b>        | direct methods                                |                           |
| <b>Structure solution program</b>          | SHELXS-97 (Sheldrick, 2008)                   |                           |
| <b>Refinement method</b>                   | Full-matrix least-squares on F <sup>2</sup>   |                           |
| <b>Refinement program</b>                  | SHELXL-97 (Sheldrick, 2008)                   |                           |
| <b>Function minimized</b>                  | $\Sigma w(F_o^2 - F_c^2)^2$                   |                           |
| <b>Data / restraints / parameters</b>      | 7291 / 0 / 373                                |                           |
| <b>Goodness-of-fit on F<sup>2</sup></b>    | 1.051                                         |                           |
| <b><math>\Delta/\sigma_{\max}</math></b>   | 0.001                                         |                           |
| <b>Final R indices</b>                     | 5371 data;<br>I>2 $\sigma$ (I)                | R1 = 0.0486, wR2 = 0.1207 |
|                                            | all data                                      | R1 = 0.0693, wR2 = 0.1341 |
| <b>Weighting scheme</b>                    | w=1/[ $\sigma^2(F_o^2)+(0.0635P)^2+0.4840P$ ] |                           |

|                                    |                                   |
|------------------------------------|-----------------------------------|
|                                    | where $P=(F_o^2+2F_c^2)/3$        |
| <b>Largest diff. peak and hole</b> | 0.719 and -0.697 eÅ <sup>-3</sup> |
| <b>R.M.S. deviation from mean</b>  | 0.069 eÅ <sup>-3</sup>            |

---

**Table 3. Atomic coordinates and equivalent isotropic atomic displacement parameters (Å<sup>2</sup>) for 48.**

U(eq) is defined as one third of the trace of the orthogonalized U<sub>ij</sub> tensor.

|    | <b>x/a</b> | <b>y/b</b> | <b>z/c</b>  | <b>U(eq)</b> |
|----|------------|------------|-------------|--------------|
| Ni | 0.51910(3) | 0.67620(3) | 0.71652(2)  | 0.02760(12)  |
| P1 | 0.34330(7) | 0.48633(7) | 0.69627(5)  | 0.02441(16)  |
| S1 | 0.76868(8) | 0.60835(9) | 0.79505(5)  | 0.0394(2)    |
| F1 | 0.7961(5)  | 0.8411(4)  | 0.9091(2)   | 0.177(2)     |
| F2 | 0.9605(4)  | 0.7848(3)  | 0.9415(2)   | 0.1557(18)   |
| F3 | 0.9548(4)  | 0.8539(3)  | 0.8278(3)   | 0.1406(16)   |
| O1 | 0.6697(2)  | 0.8504(2)  | 0.73278(14) | 0.0382(5)    |
| O2 | 0.6784(2)  | 0.6204(2)  | 0.72680(13) | 0.0357(5)    |
| O3 | 0.6936(3)  | 0.5375(4)  | 0.8469(2)   | 0.1036(13)   |
| O4 | 0.8754(3)  | 0.5698(4)  | 0.7595(2)   | 0.0841(10)   |
| C1 | 0.3867(3)  | 0.7513(3)  | 0.7028(2)   | 0.0354(6)    |
| C2 | 0.4234(3)  | 0.8756(3)  | 0.7861(2)   | 0.0409(7)    |
| C3 | 0.3164(4)  | 0.8915(4)  | 0.8338(3)   | 0.0617(10)   |
| C4 | 0.3454(6)  | 0.0068(4)  | 0.9106(3)   | 0.0884(16)   |
| C5 | 0.4811(6)  | 0.1118(4)  | 0.9420(4)   | 0.0975(18)   |
| C6 | 0.5891(5)  | 0.1008(4)  | 0.8969(3)   | 0.0722(13)   |
| C7 | 0.5639(4)  | 0.9842(3)  | 0.8194(2)   | 0.0451(8)    |

|     |           |           |             |            |
|-----|-----------|-----------|-------------|------------|
| C8  | 0.6777(3) | 0.9666(3) | 0.7714(2)   | 0.0381(7)  |
| C9  | 0.8055(3) | 0.0832(3) | 0.7616(2)   | 0.0465(8)  |
| C10 | 0.7559(4) | 0.1815(4) | 0.7402(3)   | 0.0650(11) |
| C11 | 0.9225(4) | 0.1594(4) | 0.8519(3)   | 0.0701(12) |
| C12 | 0.8699(4) | 0.0211(4) | 0.6832(3)   | 0.0626(11) |
| C13 | 0.2180(4) | 0.4492(3) | 0.5238(2)   | 0.0434(8)  |
| C14 | 0.1067(4) | 0.3903(4) | 0.4464(2)   | 0.0581(10) |
| C15 | 0.9699(4) | 0.3060(4) | 0.4477(3)   | 0.0636(11) |
| C16 | 0.9412(4) | 0.2800(4) | 0.5259(3)   | 0.0587(10) |
| C17 | 0.0517(3) | 0.3368(3) | 0.6023(2)   | 0.0432(8)  |
| C18 | 0.1906(3) | 0.4231(3) | 0.60261(19) | 0.0299(6)  |
| C19 | 0.1644(3) | 0.5378(3) | 0.8200(2)   | 0.0330(6)  |
| C20 | 0.1232(3) | 0.5552(3) | 0.9039(2)   | 0.0405(7)  |
| C21 | 0.1932(3) | 0.5351(3) | 0.9713(2)   | 0.0406(7)  |
| C22 | 0.3055(3) | 0.4992(3) | 0.9554(2)   | 0.0428(7)  |
| C23 | 0.3476(3) | 0.4821(3) | 0.87175(19) | 0.0367(7)  |
| C24 | 0.2768(3) | 0.5003(3) | 0.80246(18) | 0.0268(5)  |
| C25 | 0.2772(3) | 0.2116(3) | 0.6717(2)   | 0.0393(7)  |
| C26 | 0.3374(4) | 0.1065(3) | 0.6596(2)   | 0.0485(8)  |
| C27 | 0.3967(5) | 0.0797(4) | 0.5722(3)   | 0.0594(10) |
| C28 | 0.5050(4) | 0.2096(4) | 0.5671(3)   | 0.0547(9)  |
| C29 | 0.4450(3) | 0.3148(3) | 0.5803(2)   | 0.0390(7)  |
| C30 | 0.3929(3) | 0.3428(3) | 0.67067(19) | 0.0301(6)  |
| C31 | 0.8718(7) | 0.7810(6) | 0.8745(4)   | 0.0992(19) |

---

**Table 4. Bond lengths (Å) for 48.**

|          |            |          |           |
|----------|------------|----------|-----------|
| Ni-C1    | 1.915(3)   | Ni-O1    | 1.929(2)  |
| Ni-O2    | 1.9994(19) | Ni-P1    | 2.1434(8) |
| P1-C24   | 1.824(3)   | P1-C18   | 1.824(3)  |
| P1-C30   | 1.845(3)   | S1-O3    | 1.400(3)  |
| S1-O4    | 1.415(3)   | S1-O2    | 1.459(2)  |
| S1-C31   | 1.795(6)   | F1-C31   | 1.266(6)  |
| F2-C31   | 1.334(5)   | F3-C31   | 1.381(7)  |
| O1-C8    | 1.243(4)   | C1-C2    | 1.482(4)  |
| C1-H1A   | 0.99       | C1-H1B   | 0.99      |
| C2-C3    | 1.403(5)   | C2-C7    | 1.421(4)  |
| C3-C4    | 1.380(6)   | C3-H3    | 0.95      |
| C4-C5    | 1.373(7)   | C4-H4    | 0.95      |
| C5-C6    | 1.377(6)   | C5-H5    | 0.95      |
| C6-C7    | 1.404(5)   | C6-H6    | 0.95      |
| C7-C8    | 1.473(5)   | C8-C9    | 1.537(4)  |
| C9-C10   | 1.533(5)   | C9-C12   | 1.533(5)  |
| C9-C11   | 1.551(5)   | C10-H10A | 0.98      |
| C10-H10B | 0.98       | C10-H10C | 0.98      |
| C11-H11A | 0.98       | C11-H11B | 0.98      |
| C11-H11C | 0.98       | C12-H12A | 0.98      |
| C12-H12B | 0.98       | C12-H12C | 0.98      |
| C13-C18  | 1.392(4)   | C13-C14  | 1.398(5)  |
| C13-H13  | 0.95       | C14-C15  | 1.376(5)  |
| C14-H14  | 0.95       | C15-C16  | 1.383(5)  |
| C15-H15  | 0.95       | C16-C17  | 1.386(4)  |



|          |          |          |          |
|----------|----------|----------|----------|
| C16-H16  | 0.95     | C17-C18  | 1.391(4) |
| C17-H17  | 0.95     | C19-C20  | 1.385(4) |
| C19-C24  | 1.396(4) | C19-H19  | 0.95     |
| C20-C21  | 1.382(4) | C20-H20  | 0.95     |
| C21-C22  | 1.381(4) | C21-H21  | 0.95     |
| C22-C23  | 1.386(4) | C22-H22  | 0.95     |
| C23-C24  | 1.397(4) | C23-H23  | 0.95     |
| C25-C26  | 1.528(4) | C25-C30  | 1.530(4) |
| C25-H25A | 0.99     | C25-H25B | 0.99     |
| C26-C27  | 1.522(5) | C26-H26A | 0.99     |
| C26-H26B | 0.99     | C27-C28  | 1.517(5) |
| C27-H27A | 0.99     | C27-H27B | 0.99     |
| C28-C29  | 1.526(4) | C28-H28A | 0.99     |
| C28-H28B | 0.99     | C29-C30  | 1.527(4) |
| C29-H29A | 0.99     | C29-H29B | 0.99     |
| C30-H30  | 1.0      |          |          |

---

**Table 5. Bond angles (°) for 48.**

|            |            |            |            |
|------------|------------|------------|------------|
| C1-Ni-O1   | 86.61(11)  | C1-Ni-O2   | 171.49(11) |
| O1-Ni-O2   | 85.32(9)   | C1-Ni-P1   | 90.28(9)   |
| O1-Ni-P1   | 176.85(6)  | O2-Ni-P1   | 97.77(6)   |
| C24-P1-C18 | 107.98(12) | C24-P1-C30 | 105.14(12) |
| C18-P1-C30 | 103.23(13) | C24-P1-Ni  | 109.15(9)  |
| C18-P1-Ni  | 116.57(9)  | C30-P1-Ni  | 113.99(9)  |
| O3-S1-O4   | 114.9(2)   | O3-S1-O2   | 114.88(16) |

|               |            |               |            |
|---------------|------------|---------------|------------|
| O4-S1-O2      | 112.74(14) | O3-S1-C31     | 106.1(3)   |
| O4-S1-C31     | 102.9(3)   | O2-S1-C31     | 103.57(18) |
| C8-O1-Ni      | 129.9(2)   | S1-O2-Ni      | 140.27(13) |
| C2-C1-Ni      | 108.6(2)   | C2-C1-H1A     | 110.0      |
| Ni-C1-H1A     | 110.0      | C2-C1-H1B     | 110.0      |
| Ni-C1-H1B     | 110.0      | H1A-C1-H1B    | 108.4      |
| C3-C2-C7      | 117.3(3)   | C3-C2-C1      | 120.0(3)   |
| C7-C2-C1      | 122.6(3)   | C4-C3-C2      | 121.9(4)   |
| C4-C3-H3      | 119.0      | C2-C3-H3      | 119.0      |
| C5-C4-C3      | 120.5(4)   | C5-C4-H4      | 119.8      |
| C3-C4-H4      | 119.8      | C4-C5-C6      | 119.5(4)   |
| C4-C5-H5      | 120.2      | C6-C5-H5      | 120.2      |
| C5-C6-C7      | 121.5(4)   | C5-C6-H6      | 119.3      |
| C7-C6-H6      | 119.3      | C6-C7-C2      | 119.3(3)   |
| C6-C7-C8      | 123.1(3)   | C2-C7-C8      | 117.6(3)   |
| O1-C8-C7      | 119.3(3)   | O1-C8-C9      | 116.4(3)   |
| C7-C8-C9      | 124.3(3)   | C10-C9-C8     | 110.5(3)   |
| C10-C9-C12    | 110.0(3)   | C8-C9-C12     | 108.1(3)   |
| C10-C9-C11    | 110.4(3)   | C8-C9-C11     | 109.5(3)   |
| C12-C9-C11    | 108.3(3)   | C9-C10-H10A   | 109.5      |
| C9-C10-H10B   | 109.5      | H10A-C10-H10B | 109.5      |
| C9-C10-H10C   | 109.5      | H10A-C10-H10C | 109.5      |
| H10B-C10-H10C | 109.5      | C9-C11-H11A   | 109.5      |
| C9-C11-H11B   | 109.5      | H11A-C11-H11B | 109.5      |
| C9-C11-H11C   | 109.5      | H11A-C11-H11C | 109.5      |
| H11B-C11-H11C | 109.5      | C9-C12-H12A   | 109.5      |

|               |          |               |          |
|---------------|----------|---------------|----------|
| C9-C12-H12B   | 109.5    | H12A-C12-H12B | 109.5    |
| C9-C12-H12C   | 109.5    | H12A-C12-H12C | 109.5    |
| H12B-C12-H12C | 109.5    | C18-C13-C14   | 120.1(3) |
| C18-C13-H13   | 120.0    | C14-C13-H13   | 120.0    |
| C15-C14-C13   | 120.1(3) | C15-C14-H14   | 119.9    |
| C13-C14-H14   | 119.9    | C14-C15-C16   | 120.3(3) |
| C14-C15-H15   | 119.9    | C16-C15-H15   | 119.9    |
| C15-C16-C17   | 119.7(3) | C15-C16-H16   | 120.2    |
| C17-C16-H16   | 120.2    | C16-C17-C18   | 121.0(3) |
| C16-C17-H17   | 119.5    | C18-C17-H17   | 119.5    |
| C13-C18-C17   | 118.8(3) | C13-C18-P1    | 118.0(2) |
| C17-C18-P1    | 122.7(2) | C20-C19-C24   | 120.6(3) |
| C20-C19-H19   | 119.7    | C24-C19-H19   | 119.7    |
| C21-C20-C19   | 120.1(3) | C21-C20-H20   | 119.9    |
| C19-C20-H20   | 119.9    | C22-C21-C20   | 120.0(3) |
| C22-C21-H21   | 120.0    | C20-C21-H21   | 120.0    |
| C21-C22-C23   | 120.2(3) | C21-C22-H22   | 119.9    |
| C23-C22-H22   | 119.9    | C22-C23-C24   | 120.5(3) |
| C22-C23-H23   | 119.7    | C24-C23-H23   | 119.7    |
| C19-C24-C23   | 118.5(2) | C19-C24-P1    | 122.6(2) |
| C23-C24-P1    | 118.7(2) | C26-C25-C30   | 109.9(2) |
| C26-C25-H25A  | 109.7    | C30-C25-H25A  | 109.7    |
| C26-C25-H25B  | 109.7    | C30-C25-H25B  | 109.7    |
| H25A-C25-H25B | 108.2    | C27-C26-C25   | 111.6(3) |
| C27-C26-H26A  | 109.3    | C25-C26-H26A  | 109.3    |
| C27-C26-H26B  | 109.3    | C25-C26-H26B  | 109.3    |

|               |            |              |            |
|---------------|------------|--------------|------------|
| H26A-C26-H26B | 108.0      | C28-C27-C26  | 112.3(3)   |
| C28-C27-H27A  | 109.1      | C26-C27-H27A | 109.1      |
| C28-C27-H27B  | 109.1      | C26-C27-H27B | 109.1      |
| H27A-C27-H27B | 107.9      | C27-C28-C29  | 111.9(3)   |
| C27-C28-H28A  | 109.2      | C29-C28-H28A | 109.2      |
| C27-C28-H28B  | 109.2      | C29-C28-H28B | 109.2      |
| H28A-C28-H28B | 107.9      | C30-C29-C28  | 110.2(2)   |
| C30-C29-H29A  | 109.6      | C28-C29-H29A | 109.6      |
| C30-C29-H29B  | 109.6      | C28-C29-H29B | 109.6      |
| H29A-C29-H29B | 108.1      | C29-C30-C25  | 110.6(2)   |
| C29-C30-P1    | 111.09(19) | C25-C30-P1   | 115.37(19) |
| C29-C30-H30   | 106.4      | C25-C30-H30  | 106.4      |
| P1-C30-H30    | 106.4      | F1-C31-F2    | 109.9(5)   |
| F1-C31-F3     | 106.6(5)   | F2-C31-F3    | 107.9(5)   |
| F1-C31-S1     | 113.9(5)   | F2-C31-S1    | 109.8(4)   |
| F3-C31-S1     | 108.4(4)   |              |            |

---

**Table 6. Torsion angles (°) for 48.**

|              |            |              |             |
|--------------|------------|--------------|-------------|
| C1-Ni-P1-C24 | -78.10(13) | O1-Ni-P1-C24 | -87.5(12)   |
| O2-Ni-P1-C24 | 104.67(11) | C1-Ni-P1-C18 | 44.52(14)   |
| O1-Ni-P1-C18 | 35.1(12)   | O2-Ni-P1-C18 | -132.71(12) |
| C1-Ni-P1-C30 | 164.69(13) | O1-Ni-P1-C30 | 155.3(12)   |
| O2-Ni-P1-C30 | -12.54(11) | C1-Ni-O1-C8  | 35.7(3)     |
| O2-Ni-O1-C8  | -147.0(3)  | P1-Ni-O1-C8  | 45.1(14)    |
| O3-S1-O2-Ni  | 50.3(3)    | O4-S1-O2-Ni  | -175.5(2)   |

|                 |           |                 |             |
|-----------------|-----------|-----------------|-------------|
| C31-S1-O2-Ni    | -64.9(3)  | C1-Ni-O2-S1     | 114.5(7)    |
| O1-Ni-O2-S1     | 96.1(2)   | P1-Ni-O2-S1     | -84.6(2)    |
| O1-Ni-C1-C2     | -56.8(2)  | O2-Ni-C1-C2     | -75.2(8)    |
| P1-Ni-C1-C2     | 123.7(2)  | Ni-C1-C2-C3     | -128.7(3)   |
| Ni-C1-C2-C7     | 53.4(4)   | C7-C2-C3-C4     | -0.8(6)     |
| C1-C2-C3-C4     | -178.7(4) | C2-C3-C4-C5     | 1.2(8)      |
| C3-C4-C5-C6     | -0.7(9)   | C4-C5-C6-C7     | -0.2(8)     |
| C5-C6-C7-C2     | 0.6(7)    | C5-C6-C7-C8     | -177.7(4)   |
| C3-C2-C7-C6     | -0.1(5)   | C1-C2-C7-C6     | 177.8(3)    |
| C3-C2-C7-C8     | 178.3(3)  | C1-C2-C7-C8     | -3.8(5)     |
| Ni-O1-C8-C7     | 4.8(4)    | Ni-O1-C8-C9     | -172.66(18) |
| C6-C7-C8-O1     | 149.2(4)  | C2-C7-C8-O1     | -29.2(4)    |
| C6-C7-C8-C9     | -33.6(5)  | C2-C7-C8-C9     | 148.1(3)    |
| O1-C8-C9-C10    | 136.0(3)  | C7-C8-C9-C10    | -41.4(4)    |
| O1-C8-C9-C12    | 15.5(4)   | C7-C8-C9-C12    | -161.8(3)   |
| O1-C8-C9-C11    | -102.2(4) | C7-C8-C9-C11    | 80.5(4)     |
| C18-C13-C14-C15 | -0.2(5)   | C13-C14-C15-C16 | 0.6(6)      |
| C14-C15-C16-C17 | -1.5(6)   | C15-C16-C17-C18 | 1.9(6)      |
| C14-C13-C18-C17 | 0.7(5)    | C14-C13-C18-P1  | 173.0(3)    |
| C16-C17-C18-C13 | -1.5(5)   | C16-C17-C18-P1  | -173.5(3)   |
| C24-P1-C18-C13  | 157.3(2)  | C30-P1-C18-C13  | -91.6(2)    |
| Ni-P1-C18-C13   | 34.1(3)   | C24-P1-C18-C17  | -30.6(3)    |
| C30-P1-C18-C17  | 80.4(3)   | Ni-P1-C18-C17   | -153.9(2)   |
| C24-C19-C20-C21 | -0.2(5)   | C19-C20-C21-C22 | 0.7(5)      |
| C20-C21-C22-C23 | -0.5(5)   | C21-C22-C23-C24 | -0.3(5)     |
| C20-C19-C24-C23 | -0.6(4)   | C20-C19-C24-P1  | -176.0(2)   |

|                 |          |                 |            |
|-----------------|----------|-----------------|------------|
| C22-C23-C24-C19 | 0.9(4)   | C22-C23-C24-P1  | 176.5(2)   |
| C18-P1-C24-C19  | -35.0(3) | C30-P1-C24-C19  | -144.7(2)  |
| Ni-P1-C24-C19   | 92.6(2)  | C18-P1-C24-C23  | 149.6(2)   |
| C30-P1-C24-C23  | 39.9(3)  | Ni-P1-C24-C23   | -82.8(2)   |
| C30-C25-C26-C27 | -55.8(4) | C25-C26-C27-C28 | 53.2(4)    |
| C26-C27-C28-C29 | -52.9(4) | C27-C28-C29-C30 | 55.3(4)    |
| C28-C29-C30-C25 | -58.5(3) | C28-C29-C30-P1  | 172.1(2)   |
| C26-C25-C30-C29 | 58.8(3)  | C26-C25-C30-P1  | -174.1(2)  |
| C24-P1-C30-C29  | 177.5(2) | C18-P1-C30-C29  | 64.5(2)    |
| Ni-P1-C30-C29   | -63.0(2) | C24-P1-C30-C25  | 50.7(2)    |
| C18-P1-C30-C25  | -62.4(2) | Ni-P1-C30-C25   | 170.21(18) |
| O3-S1-C31-F1    | -65.0(5) | O4-S1-C31-F1    | 174.0(4)   |
| O2-S1-C31-F1    | 56.3(5)  | O3-S1-C31-F2    | 58.8(6)    |
| O4-S1-C31-F2    | -62.3(5) | O2-S1-C31-F2    | -179.9(5)  |
| O3-S1-C31-F3    | 176.5(3) | O4-S1-C31-F3    | 55.5(3)    |
| O2-S1-C31-F3    | -62.2(4) |                 |            |

---

**Table 7. Anisotropic atomic displacement parameters ( $\text{\AA}^2$ ) for 48.**

The anisotropic atomic displacement factor exponent takes the form:  $-2\pi^2 [ h^2 a^{*2} U_{11} + \dots + 2 h k a^* b^* U_{12} ]$

|    | $U_{11}$    | $U_{22}$  | $U_{33}$   | $U_{23}$    | $U_{13}$    | $U_{12}$    |
|----|-------------|-----------|------------|-------------|-------------|-------------|
| Ni | 0.02274(18) | 0.0295(2) | 0.0324(2)  | 0.01558(16) | 0.00605(14) | 0.00993(15) |
| P1 | 0.0232(3)   | 0.0265(4) | 0.0258(3)  | 0.0116(3)   | 0.0072(3)   | 0.0113(3)   |
| S1 | 0.0342(4)   | 0.0506(5) | 0.0399(4)  | 0.0233(4)   | 0.0067(3)   | 0.0199(4)   |
| F1 | 0.291(5)    | 0.196(4)  | 0.0644(19) | -0.035(2)   | -0.043(2)   | 0.207(4)    |
| F2 | 0.204(4)    | 0.100(2)  | 0.110(2)   | -0.0212(18) | -0.107(2)   | 0.084(3)    |

|     |            |            |            |            |             |             |
|-----|------------|------------|------------|------------|-------------|-------------|
| F3  | 0.083(2)   | 0.085(2)   | 0.213(4)   | 0.068(3)   | -0.053(2)   | -0.0028(17) |
| O1  | 0.0295(10) | 0.0344(12) | 0.0492(13) | 0.0216(10) | 0.0056(9)   | 0.0081(9)   |
| O2  | 0.0289(10) | 0.0444(12) | 0.0392(11) | 0.0192(10) | 0.0058(9)   | 0.0188(9)   |
| O3  | 0.0612(19) | 0.163(3)   | 0.095(2)   | 0.103(3)   | 0.0074(17)  | 0.013(2)    |
| O4  | 0.086(2)   | 0.147(3)   | 0.0678(18) | 0.046(2)   | 0.0259(16)  | 0.093(2)    |
| C1  | 0.0299(15) | 0.0326(15) | 0.0451(17) | 0.0174(14) | 0.0055(13)  | 0.0131(13)  |
| C2  | 0.0438(18) | 0.0317(16) | 0.0490(19) | 0.0173(14) | 0.0140(15)  | 0.0160(14)  |
| C3  | 0.060(2)   | 0.041(2)   | 0.083(3)   | 0.021(2)   | 0.034(2)    | 0.0209(18)  |
| C4  | 0.102(4)   | 0.055(3)   | 0.097(4)   | 0.018(3)   | 0.062(3)    | 0.027(3)    |
| C5  | 0.114(4)   | 0.045(2)   | 0.094(4)   | -0.003(2)  | 0.058(3)    | 0.016(3)    |
| C6  | 0.079(3)   | 0.038(2)   | 0.063(2)   | 0.0045(19) | 0.026(2)    | 0.000(2)    |
| C7  | 0.053(2)   | 0.0300(16) | 0.0449(18) | 0.0139(14) | 0.0142(16)  | 0.0104(15)  |
| C8  | 0.0354(16) | 0.0342(17) | 0.0364(16) | 0.0159(14) | -0.0030(13) | 0.0061(13)  |
| C9  | 0.0331(16) | 0.0385(18) | 0.060(2)   | 0.0276(16) | -0.0007(15) | 0.0016(14)  |
| C10 | 0.052(2)   | 0.056(2)   | 0.100(3)   | 0.054(2)   | 0.017(2)    | 0.0155(18)  |
| C11 | 0.051(2)   | 0.048(2)   | 0.085(3)   | 0.021(2)   | -0.017(2)   | 0.0029(18)  |
| C12 | 0.045(2)   | 0.059(2)   | 0.084(3)   | 0.042(2)   | 0.026(2)    | 0.0086(18)  |
| C13 | 0.0465(18) | 0.057(2)   | 0.0347(16) | 0.0207(15) | 0.0101(14)  | 0.0277(16)  |
| C14 | 0.077(3)   | 0.069(3)   | 0.0315(17) | 0.0151(17) | 0.0027(18)  | 0.039(2)    |
| C15 | 0.062(3)   | 0.065(3)   | 0.050(2)   | 0.0083(19) | -0.0194(19) | 0.028(2)    |
| C16 | 0.0372(18) | 0.055(2)   | 0.064(2)   | 0.0171(19) | -0.0129(17) | 0.0082(16)  |
| C17 | 0.0328(16) | 0.0455(19) | 0.0422(17) | 0.0189(15) | -0.0002(13) | 0.0072(14)  |
| C18 | 0.0278(14) | 0.0292(14) | 0.0308(14) | 0.0100(12) | 0.0027(11)  | 0.0121(12)  |
| C19 | 0.0342(15) | 0.0366(16) | 0.0367(15) | 0.0183(13) | 0.0144(12)  | 0.0191(13)  |
| C20 | 0.0415(17) | 0.0386(17) | 0.0471(18) | 0.0166(15) | 0.0249(15)  | 0.0208(14)  |
| C21 | 0.0457(18) | 0.0371(17) | 0.0336(16) | 0.0126(13) | 0.0185(14)  | 0.0119(14)  |

|     |            |            |            |            |            |            |
|-----|------------|------------|------------|------------|------------|------------|
| C22 | 0.0425(18) | 0.053(2)   | 0.0324(16) | 0.0198(15) | 0.0063(13) | 0.0177(15) |
| C23 | 0.0324(15) | 0.0465(18) | 0.0334(15) | 0.0167(14) | 0.0085(12) | 0.0179(14) |
| C24 | 0.0255(13) | 0.0275(13) | 0.0266(13) | 0.0113(11) | 0.0070(10) | 0.0097(11) |
| C25 | 0.0420(17) | 0.0325(16) | 0.0462(18) | 0.0166(14) | 0.0130(14) | 0.0169(14) |
| C26 | 0.057(2)   | 0.0340(17) | 0.059(2)   | 0.0200(16) | 0.0154(17) | 0.0225(16) |
| C27 | 0.083(3)   | 0.042(2)   | 0.063(2)   | 0.0164(18) | 0.022(2)   | 0.040(2)   |
| C28 | 0.075(3)   | 0.056(2)   | 0.058(2)   | 0.0249(18) | 0.036(2)   | 0.047(2)   |
| C29 | 0.0506(19) | 0.0386(17) | 0.0385(16) | 0.0160(14) | 0.0198(14) | 0.0273(15) |
| C30 | 0.0320(14) | 0.0302(14) | 0.0339(15) | 0.0143(12) | 0.0116(12) | 0.0169(12) |
| C31 | 0.117(5)   | 0.095(4)   | 0.072(3)   | 0.006(3)   | -0.039(3)  | 0.062(4)   |

---

**Table 8. Hydrogen atomic coordinates and isotropic atomic displacement parameters ( $\text{\AA}^2$ ) for 48.**

|      | x/a    | y/b    | z/c    | U(eq) |
|------|--------|--------|--------|-------|
| H1A  | 0.3932 | 0.7741 | 0.6475 | 0.042 |
| H1B  | 0.2871 | 0.6842 | 0.6953 | 0.042 |
| H3   | 0.2213 | 0.8209 | 0.8125 | 0.074 |
| H4   | 0.2709 | 1.0136 | 0.9419 | 0.106 |
| H5   | 0.5004 | 1.1914 | 0.9945 | 0.117 |
| H6   | 0.6828 | 1.1738 | 0.9188 | 0.087 |
| H10A | 0.6808 | 1.1316 | 0.6837 | 0.097 |
| H10B | 0.8378 | 1.2530 | 0.7317 | 0.097 |
| H10C | 0.7174 | 1.2227 | 0.7914 | 0.097 |
| H11A | 0.8841 | 1.2021 | 0.9026 | 0.105 |
| H11B | 1.0068 | 1.2296 | 0.8441 | 0.105 |
| H11C | 0.9505 | 1.0947 | 0.8659 | 0.105 |



|      |         |        |        |       |
|------|---------|--------|--------|-------|
| H12A | 0.9085  | 0.9644 | 0.6997 | 0.094 |
| H12B | 0.9475  | 1.0941 | 0.6729 | 0.094 |
| H12C | 0.7949  | 0.9652 | 0.6268 | 0.094 |
| H13  | 0.3124  | 0.5072 | 0.5226 | 0.052 |
| H14  | 0.1255  | 0.4086 | 0.3927 | 0.07  |
| H15  | -0.1052 | 0.2655 | 0.3948 | 0.076 |
| H16  | -0.1537 | 0.2234 | 0.5273 | 0.07  |
| H17  | 0.0324  | 0.3165 | 0.6552 | 0.052 |
| H19  | 0.1157  | 0.5515 | 0.7739 | 0.04  |
| H20  | 0.0468  | 0.5810 | 0.9151 | 0.049 |
| H21  | 0.1641  | 0.5461 | 1.0285 | 0.049 |
| H22  | 0.3539  | 0.4861 | 1.0020 | 0.051 |
| H23  | 0.4253  | 0.4579 | 0.8614 | 0.044 |
| H25A | 0.2451  | 0.2311 | 0.7309 | 0.047 |
| H25B | 0.1929  | 0.1749 | 0.6213 | 0.047 |
| H26A | 0.4150  | 0.1397 | 0.7135 | 0.058 |
| H26B | 0.2603  | 0.0204 | 0.6568 | 0.058 |
| H27A | 0.4433  | 0.0185 | 0.5701 | 0.071 |
| H27B | 0.3161  | 0.0329 | 0.5179 | 0.071 |
| H28A | 0.5324  | 0.1881 | 0.5065 | 0.066 |
| H28B | 0.5929  | 0.2485 | 0.6153 | 0.066 |
| H29A | 0.5206  | 0.4002 | 0.5810 | 0.047 |
| H29B | 0.3639  | 0.2806 | 0.5282 | 0.047 |
| H30  | 0.4771  | 0.3726 | 0.7204 | 0.036 |

---

**Table 1. Sample and crystal data for (R)-38.**

|                               |                                   |                  |
|-------------------------------|-----------------------------------|------------------|
| <b>Identification code</b>    | 39                                |                  |
| <b>Chemical formula</b>       | C <sub>18</sub> H <sub>15</sub> F |                  |
| <b>Formula weight</b>         | 250.30                            |                  |
| <b>Temperature</b>            | 200(2) K                          |                  |
| <b>Wavelength</b>             | 1.54178 Å                         |                  |
| <b>Crystal size</b>           | 0.150 x 0.350 x 0.480 mm          |                  |
| <b>Crystal system</b>         | monoclinic                        |                  |
| <b>Space group</b>            | P 1 21 1                          |                  |
| <b>Unit cell dimensions</b>   | a = 5.90540(10) Å                 | α = 90°          |
|                               | b = 16.7300(3) Å                  | β = 96.1650(10)° |
|                               | c = 13.3212(2) Å                  | γ = 90°          |
| <b>Volume</b>                 | 1308.49(4) Å <sup>3</sup>         |                  |
| <b>Z</b>                      | 4                                 |                  |
| <b>Density (calculated)</b>   | 1.271 g/cm <sup>3</sup>           |                  |
| <b>Absorption coefficient</b> | 0.650 mm <sup>-1</sup>            |                  |
| <b>F(000)</b>                 | 528                               |                  |

---

**Table 2. Data collection and structure refinement for (R)-38.**

|                                            |                                  |
|--------------------------------------------|----------------------------------|
| <b>Theta range for data collection</b>     | 3.34 to 68.54°                   |
| <b>Index ranges</b>                        | -6<=h<=6, -19<=k<=19, -14<=l<=15 |
| <b>Reflections collected</b>               | 13728                            |
| <b>Independent reflections</b>             | 4325 [R(int) = 0.0245]           |
| <b>Coverage of independent reflections</b> | 94.0%                            |
| <b>Absorption correction</b>               | numerical                        |

|                                          |                                             |                              |
|------------------------------------------|---------------------------------------------|------------------------------|
| <b>Max. and min. transmission</b>        | 0.9065 and 0.7460                           |                              |
| <b>Structure solution technique</b>      | direct methods                              |                              |
| <b>Structure solution program</b>        | SHELXS-97 (Sheldrick, 2008)                 |                              |
| <b>Refinement method</b>                 | Full-matrix least-squares on F <sup>2</sup> |                              |
| <b>Refinement program</b>                | SHELXL-97 (Sheldrick, 2008)                 |                              |
| <b>Function minimized</b>                | $\Sigma w(F_o^2 - F_c^2)^2$                 |                              |
| <b>Data / restraints / parameters</b>    | 4325 / 1 / 346                              |                              |
| <b>Goodness-of-fit on F<sup>2</sup></b>  | 1.051                                       |                              |
| <b><math>\Delta/\sigma_{\max}</math></b> | 0.001                                       |                              |
| <b>Final R indices</b>                   | 4271 data;<br>I > 2 $\sigma$ (I)            | R1 = 0.0256, wR2 =<br>0.0743 |
|                                          | all data                                    | R1 = 0.0259, wR2 =<br>0.0746 |
| <b>Weighting scheme</b>                  | $w=1/[\sigma^2(F_o^2)+(0.0535P)^2+0.0621P]$ |                              |
|                                          | where $P=(F_o^2+2F_c^2)/3$                  |                              |
| <b>Absolute structure parameter</b>      | -0.0(1)                                     |                              |
| <b>Extinction coefficient</b>            | 0.0063(5)                                   |                              |
| <b>Largest diff. peak and hole</b>       | 0.128 and -0.136 eÅ <sup>-3</sup>           |                              |
| <b>R.M.S. deviation from mean</b>        | 0.027 eÅ <sup>-3</sup>                      |                              |

---

**Table 3. Atomic coordinates and equivalent isotropic atomic displacement parameters (Å<sup>2</sup>) for (R)-38.**

U(eq) is defined as one third of the trace of the orthogonalized U<sub>ij</sub> tensor.

|    | <b>x/a</b>  | <b>y/b</b> | <b>z/c</b> | <b>U(eq)</b> |
|----|-------------|------------|------------|--------------|
| F1 | 0.78102(16) | 0.28608(5) | 0.70926(7) | 0.0617(2)    |
| F2 | 0.25541(13) | 0.02974(5) | 0.77523(6) | 0.0511(2)    |

|     |             |            |             |           |
|-----|-------------|------------|-------------|-----------|
| C1  | 0.7711(2)   | 0.07812(8) | 0.63582(10) | 0.0406(3) |
| C2  | 0.8474(2)   | 0.15017(8) | 0.67892(10) | 0.0457(3) |
| C3  | 0.7067(2)   | 0.21504(8) | 0.66718(10) | 0.0416(3) |
| C4  | 0.4944(2)   | 0.21182(8) | 0.61473(10) | 0.0453(3) |
| C5  | 0.4221(2)   | 0.13964(8) | 0.57175(10) | 0.0414(3) |
| C6  | 0.55754(19) | 0.07171(7) | 0.58146(8)  | 0.0318(2) |
| C7  | 0.46627(19) | 0.99324(7) | 0.53480(8)  | 0.0326(2) |
| C8  | 0.3827(2)   | 0.00438(8) | 0.42189(10) | 0.0434(3) |
| C9  | 0.63220(18) | 0.92413(6) | 0.55010(8)  | 0.0301(2) |
| C10 | 0.82302(19) | 0.91873(7) | 0.49396(9)  | 0.0367(3) |
| C11 | 0.9720(2)   | 0.85664(7) | 0.50721(10) | 0.0363(3) |
| C12 | 0.94320(19) | 0.79510(7) | 0.57731(8)  | 0.0309(2) |
| C13 | 0.09678(19) | 0.73014(7) | 0.59358(9)  | 0.0364(3) |
| C14 | 0.0636(2)   | 0.67254(7) | 0.66276(9)  | 0.0390(3) |
| C15 | 0.8750(2)   | 0.67610(8) | 0.71843(9)  | 0.0393(3) |
| C16 | 0.72346(19) | 0.73758(7) | 0.70446(8)  | 0.0344(3) |
| C17 | 0.75329(18) | 0.79895(6) | 0.63399(8)  | 0.0285(2) |
| C18 | 0.60086(18) | 0.86450(7) | 0.61811(8)  | 0.0306(2) |
| C19 | 0.23448(19) | 0.82968(7) | 0.87665(9)  | 0.0361(3) |
| C20 | 0.16757(19) | 0.89905(8) | 0.82428(9)  | 0.0382(3) |
| C21 | 0.31925(19) | 0.96132(7) | 0.82591(8)  | 0.0358(3) |
| C22 | 0.53324(19) | 0.95748(7) | 0.87681(9)  | 0.0389(3) |
| C23 | 0.59690(19) | 0.88762(7) | 0.92893(9)  | 0.0381(3) |
| C24 | 0.44974(18) | 0.82264(7) | 0.93039(8)  | 0.0319(2) |
| C25 | 0.53247(18) | 0.74660(7) | 0.98635(9)  | 0.0346(3) |
| C26 | 0.6088(2)   | 0.76320(8) | 0.09843(10) | 0.0451(3) |

|     |             |            |             |           |
|-----|-------------|------------|-------------|-----------|
| C27 | 0.36375(18) | 0.67799(6) | 0.97332(9)  | 0.0314(2) |
| C28 | 0.17501(19) | 0.67313(7) | 0.03108(9)  | 0.0362(3) |
| C29 | 0.02140(19) | 0.61201(7) | 0.01739(9)  | 0.0346(3) |
| C30 | 0.04250(18) | 0.55201(6) | 0.94417(8)  | 0.0301(2) |
| C31 | 0.88028(19) | 0.49013(7) | 0.92416(9)  | 0.0354(3) |
| C32 | 0.9036(2)   | 0.43519(7) | 0.85032(10) | 0.0401(3) |
| C33 | 0.0923(2)   | 0.43779(7) | 0.79438(9)  | 0.0381(3) |
| C34 | 0.2538(2)   | 0.49587(7) | 0.81319(9)  | 0.0339(3) |
| C35 | 0.23254(18) | 0.55543(6) | 0.88714(8)  | 0.0283(2) |
| C36 | 0.38926(18) | 0.61900(7) | 0.90441(8)  | 0.0302(2) |

---

**Table 4. Bond lengths (Å) for (R)-38.**

|         |            |         |            |
|---------|------------|---------|------------|
| F1-C3   | 1.3662(15) | F2-C21  | 1.3615(14) |
| C1-C6   | 1.3892(17) | C1-C2   | 1.3893(18) |
| C2-C3   | 1.3656(19) | C3-C4   | 1.369(2)   |
| C4-C5   | 1.3844(19) | C5-C6   | 1.3878(17) |
| C6-C7   | 1.5258(16) | C7-C9   | 1.5151(15) |
| C7-C8   | 1.5431(16) | C9-C18  | 1.3734(16) |
| C9-C10  | 1.4206(15) | C10-C11 | 1.3607(17) |
| C11-C12 | 1.4126(17) | C12-C13 | 1.4171(16) |
| C12-C17 | 1.4191(15) | C13-C14 | 1.3620(18) |
| C14-C15 | 1.4041(18) | C15-C16 | 1.3630(17) |
| C16-C17 | 1.4148(16) | C17-C18 | 1.4201(15) |
| C19-C20 | 1.3895(18) | C19-C24 | 1.3953(16) |
| C20-C21 | 1.3726(17) | C21-C22 | 1.3700(17) |

|         |            |         |            |
|---------|------------|---------|------------|
| C22-C23 | 1.3904(18) | C23-C24 | 1.3932(16) |
| C24-C25 | 1.5280(16) | C25-C27 | 1.5176(15) |
| C25-C26 | 1.5379(17) | C27-C36 | 1.3672(16) |
| C27-C28 | 1.4231(16) | C28-C29 | 1.3661(17) |
| C29-C30 | 1.4145(16) | C30-C31 | 1.4162(16) |
| C30-C35 | 1.4223(15) | C31-C32 | 1.3639(18) |
| C32-C33 | 1.4062(18) | C33-C34 | 1.3656(17) |
| C34-C35 | 1.4161(16) | C35-C36 | 1.4124(15) |

---

**Table 5. Bond angles (°) for (R)-38.**

|             |            |             |            |
|-------------|------------|-------------|------------|
| C6-C1-C2    | 121.23(12) | C3-C2-C1    | 118.42(11) |
| C2-C3-F1    | 118.68(12) | C2-C3-C4    | 122.66(11) |
| F1-C3-C4    | 118.66(12) | C3-C4-C5    | 118.06(12) |
| C4-C5-C6    | 121.77(11) | C5-C6-C1    | 117.86(11) |
| C5-C6-C7    | 119.45(10) | C1-C6-C7    | 122.68(10) |
| C9-C7-C6    | 114.00(9)  | C9-C7-C8    | 110.96(10) |
| C6-C7-C8    | 110.80(10) | C18-C9-C10  | 118.15(10) |
| C18-C9-C7   | 120.80(10) | C10-C9-C7   | 121.05(10) |
| C11-C10-C9  | 121.25(10) | C10-C11-C12 | 121.33(10) |
| C11-C12-C13 | 122.64(10) | C11-C12-C17 | 118.49(10) |
| C13-C12-C17 | 118.87(10) | C14-C13-C12 | 120.65(11) |
| C13-C14-C15 | 120.49(11) | C16-C15-C14 | 120.41(11) |
| C15-C16-C17 | 120.77(11) | C16-C17-C12 | 118.81(10) |
| C16-C17-C18 | 122.49(10) | C12-C17-C18 | 118.70(10) |
| C9-C18-C17  | 122.08(10) | C20-C19-C24 | 121.49(11) |

|             |            |             |            |
|-------------|------------|-------------|------------|
| C21-C20-C19 | 118.43(10) | F2-C21-C22  | 118.45(11) |
| F2-C21-C20  | 119.00(10) | C22-C21-C20 | 122.55(11) |
| C21-C22-C23 | 118.17(11) | C22-C23-C24 | 121.82(10) |
| C23-C24-C19 | 117.54(11) | C23-C24-C25 | 119.29(9)  |
| C19-C24-C25 | 123.13(10) | C27-C25-C24 | 113.72(9)  |
| C27-C25-C26 | 111.59(10) | C24-C25-C26 | 111.61(9)  |
| C36-C27-C28 | 118.10(10) | C36-C27-C25 | 120.30(10) |
| C28-C27-C25 | 121.60(10) | C29-C28-C27 | 121.20(10) |
| C28-C29-C30 | 121.12(10) | C29-C30-C31 | 122.73(10) |
| C29-C30-C35 | 118.21(10) | C31-C30-C35 | 119.05(10) |
| C32-C31-C30 | 120.64(10) | C31-C32-C33 | 120.57(11) |
| C34-C33-C32 | 120.14(11) | C33-C34-C35 | 121.07(10) |
| C36-C35-C34 | 122.52(10) | C36-C35-C30 | 118.96(10) |
| C34-C35-C30 | 118.50(10) | C27-C36-C35 | 122.37(10) |

---

**Table 6. Torsion angles (°) for (*R*)-38.**

|              |            |              |             |
|--------------|------------|--------------|-------------|
| C6-C1-C2-C3  | 0.3(2)     | C1-C2-C3-F1  | -179.89(11) |
| C1-C2-C3-C4  | -0.1(2)    | C2-C3-C4-C5  | -0.4(2)     |
| F1-C3-C4-C5  | 179.46(12) | C3-C4-C5-C6  | 0.5(2)      |
| C4-C5-C6-C1  | -0.27(19)  | C4-C5-C6-C7  | 178.39(11)  |
| C2-C1-C6-C5  | -0.19(19)  | C2-C1-C6-C7  | -178.80(11) |
| C5-C6-C7-C9  | 179.44(10) | C1-C6-C7-C9  | -1.97(16)   |
| C5-C6-C7-C8  | 53.42(14)  | C1-C6-C7-C8  | -127.99(12) |
| C6-C7-C9-C18 | 105.88(11) | C8-C7-C9-C18 | -128.19(11) |
| C6-C7-C9-C10 | -74.73(13) | C8-C7-C9-C10 | 51.20(14)   |

|                 |             |                 |             |
|-----------------|-------------|-----------------|-------------|
| C18-C9-C10-C11  | -0.37(16)   | C7-C9-C10-C11   | -179.78(10) |
| C9-C10-C11-C12  | -0.04(18)   | C10-C11-C12-C13 | -179.30(11) |
| C10-C11-C12-C17 | 0.32(16)    | C11-C12-C13-C14 | 179.30(11)  |
| C17-C12-C13-C14 | -0.32(16)   | C12-C13-C14-C15 | 0.69(17)    |
| C13-C14-C15-C16 | -0.46(18)   | C14-C15-C16-C17 | -0.14(18)   |
| C15-C16-C17-C12 | 0.50(16)    | C15-C16-C17-C18 | -179.22(10) |
| C11-C12-C17-C16 | -179.91(10) | C13-C12-C17-C16 | -0.27(14)   |
| C11-C12-C17-C18 | -0.18(14)   | C13-C12-C17-C18 | 179.46(9)   |
| C10-C9-C18-C17  | 0.52(15)    | C7-C9-C18-C17   | 179.92(9)   |
| C16-C17-C18-C9  | 179.47(10)  | C12-C17-C18-C9  | -0.24(15)   |
| C24-C19-C20-C21 | 0.30(18)    | C19-C20-C21-F2  | -179.73(10) |
| C19-C20-C21-C22 | 0.17(18)    | F2-C21-C22-C23  | 179.61(10)  |
| C20-C21-C22-C23 | -0.29(18)   | C21-C22-C23-C24 | -0.05(18)   |
| C22-C23-C24-C19 | 0.49(17)    | C22-C23-C24-C25 | 178.11(11)  |
| C20-C19-C24-C23 | -0.61(17)   | C20-C19-C24-C25 | -178.14(11) |
| C23-C24-C25-C27 | -174.34(10) | C19-C24-C25-C27 | 3.15(16)    |
| C23-C24-C25-C26 | 58.33(14)   | C19-C24-C25-C26 | -124.19(12) |
| C24-C25-C27-C36 | 98.96(12)   | C26-C25-C27-C36 | -133.70(11) |
| C24-C25-C27-C28 | -80.59(13)  | C26-C25-C27-C28 | 46.75(14)   |
| C36-C27-C28-C29 | -0.90(17)   | C25-C27-C28-C29 | 178.66(10)  |
| C27-C28-C29-C30 | -0.99(17)   | C28-C29-C30-C31 | -176.61(10) |
| C28-C29-C30-C35 | 2.02(16)    | C29-C30-C31-C32 | 177.66(10)  |
| C35-C30-C31-C32 | -0.95(15)   | C30-C31-C32-C33 | 1.61(17)    |
| C31-C32-C33-C34 | -0.40(17)   | C32-C33-C34-C35 | -1.48(17)   |
| C33-C34-C35-C36 | -176.22(10) | C33-C34-C35-C30 | 2.08(16)    |
| C29-C30-C35-C36 | -1.18(14)   | C31-C30-C35-C36 | 177.50(9)   |



|                 |            |                 |            |
|-----------------|------------|-----------------|------------|
| C29-C30-C35-C34 | -179.54(9) | C31-C30-C35-C34 | -0.86(14)  |
| C28-C27-C36-C35 | 1.75(16)   | C25-C27-C36-C35 | -177.82(9) |
| C34-C35-C36-C27 | 177.58(10) | C30-C35-C36-C27 | -0.71(15)  |

---

**Table 7. Anisotropic atomic displacement parameters ( $\text{\AA}^2$ ) for (R)-38.**

The anisotropic atomic displacement factor exponent takes the form:  $-2\pi^2 [ h^2 a^{*2} U_{11} + \dots + 2 h k a^* b^* U_{12} ]$

|     | $U_{11}$  | $U_{22}$  | $U_{33}$  | $U_{23}$   | $U_{13}$   | $U_{12}$   |
|-----|-----------|-----------|-----------|------------|------------|------------|
| F1  | 0.0848(6) | 0.0394(5) | 0.0614(5) | -0.0184(4) | 0.0105(4)  | -0.0157(4) |
| F2  | 0.0571(5) | 0.0446(4) | 0.0510(4) | 0.0109(4)  | 0.0033(3)  | 0.0041(3)  |
| C1  | 0.0399(7) | 0.0361(6) | 0.0438(6) | -0.0038(5) | -0.0040(5) | 0.0042(5)  |
| C2  | 0.0436(7) | 0.0465(7) | 0.0450(7) | -0.0088(6) | -0.0045(5) | -0.0045(6) |
| C3  | 0.0576(7) | 0.0322(6) | 0.0367(6) | -0.0070(5) | 0.0121(5)  | -0.0095(5) |
| C4  | 0.0541(7) | 0.0327(7) | 0.0495(7) | -0.0012(5) | 0.0071(6)  | 0.0073(6)  |
| C5  | 0.0372(6) | 0.0386(7) | 0.0476(7) | -0.0014(5) | 0.0008(5)  | 0.0026(5)  |
| C6  | 0.0328(6) | 0.0324(6) | 0.0308(5) | 0.0019(4)  | 0.0060(4)  | -0.0010(4) |
| C7  | 0.0314(5) | 0.0321(6) | 0.0344(6) | 0.0023(5)  | 0.0042(4)  | -0.0027(4) |
| C8  | 0.0496(7) | 0.0404(7) | 0.0384(6) | 0.0010(5)  | -0.0038(5) | -0.0017(5) |
| C9  | 0.0311(5) | 0.0281(6) | 0.0309(5) | -0.0028(4) | 0.0029(4)  | -0.0039(4) |
| C10 | 0.0395(6) | 0.0331(6) | 0.0389(6) | 0.0028(5)  | 0.0108(5)  | -0.0059(5) |
| C11 | 0.0340(6) | 0.0368(6) | 0.0400(6) | -0.0025(5) | 0.0128(5)  | -0.0054(5) |
| C12 | 0.0302(5) | 0.0324(6) | 0.0302(5) | -0.0060(5) | 0.0035(4)  | -0.0066(4) |
| C13 | 0.0313(5) | 0.0408(6) | 0.0372(6) | -0.0066(5) | 0.0046(4)  | 0.0003(5)  |
| C14 | 0.0362(6) | 0.0371(6) | 0.0421(6) | -0.0027(5) | -0.0034(5) | 0.0065(5)  |
| C15 | 0.0428(7) | 0.0394(7) | 0.0343(6) | 0.0065(5)  | -0.0019(5) | -0.0017(5) |
| C16 | 0.0341(6) | 0.0392(7) | 0.0298(5) | 0.0009(5)  | 0.0036(4)  | -0.0030(5) |

|     |           |           |           |            |            |            |
|-----|-----------|-----------|-----------|------------|------------|------------|
| C17 | 0.0290(5) | 0.0291(6) | 0.0268(5) | -0.0049(4) | 0.0000(4)  | -0.0055(4) |
| C18 | 0.0300(5) | 0.0320(6) | 0.0302(5) | -0.0041(4) | 0.0046(4)  | -0.0033(4) |
| C19 | 0.0288(5) | 0.0359(6) | 0.0428(6) | -0.0054(5) | 0.0005(5)  | -0.0051(4) |
| C20 | 0.0309(6) | 0.0433(7) | 0.0392(6) | -0.0035(5) | -0.0014(5) | 0.0012(5)  |
| C21 | 0.0405(6) | 0.0362(6) | 0.0316(6) | -0.0006(5) | 0.0078(5)  | 0.0025(5)  |
| C22 | 0.0367(6) | 0.0371(7) | 0.0431(6) | -0.0025(5) | 0.0056(5)  | -0.0081(5) |
| C23 | 0.0282(6) | 0.0430(7) | 0.0425(6) | -0.0037(5) | 0.0001(5)  | -0.0031(5) |
| C24 | 0.0276(5) | 0.0329(6) | 0.0351(5) | -0.0071(5) | 0.0031(4)  | 0.0001(4)  |
| C25 | 0.0275(5) | 0.0328(6) | 0.0432(6) | -0.0074(5) | 0.0027(4)  | 0.0015(4)  |
| C26 | 0.0477(7) | 0.0407(7) | 0.0444(7) | -0.0043(5) | -0.0070(5) | -0.0001(5) |
| C27 | 0.0296(5) | 0.0289(6) | 0.0352(6) | -0.0008(5) | 0.0009(4)  | 0.0035(4)  |
| C28 | 0.0384(6) | 0.0336(6) | 0.0374(6) | -0.0070(5) | 0.0074(5)  | 0.0067(5)  |
| C29 | 0.0315(6) | 0.0384(6) | 0.0356(6) | 0.0025(5)  | 0.0108(5)  | 0.0047(5)  |
| C30 | 0.0299(5) | 0.0303(6) | 0.0298(5) | 0.0075(4)  | 0.0016(4)  | 0.0052(4)  |
| C31 | 0.0313(6) | 0.0357(6) | 0.0390(6) | 0.0085(5)  | 0.0035(5)  | -0.0008(5) |
| C32 | 0.0414(6) | 0.0328(6) | 0.0442(7) | 0.0055(5)  | -0.0040(5) | -0.0055(5) |
| C33 | 0.0499(7) | 0.0304(6) | 0.0330(6) | -0.0010(5) | -0.0006(5) | 0.0009(5)  |
| C34 | 0.0390(6) | 0.0322(6) | 0.0309(5) | 0.0024(5)  | 0.0055(5)  | 0.0039(5)  |
| C35 | 0.0293(5) | 0.0277(6) | 0.0274(5) | 0.0052(4)  | 0.0004(4)  | 0.0041(4)  |
| C36 | 0.0281(5) | 0.0317(6) | 0.0312(5) | 0.0026(4)  | 0.0056(4)  | 0.0038(4)  |

---

**Table 8. Hydrogen atomic coordinates and isotropic atomic displacement parameters ( $\text{\AA}^2$ ) for (*R*)-38.**

|     | <b>x/a</b> | <b>y/b</b> | <b>z/c</b> | <b>U(eq)</b> |
|-----|------------|------------|------------|--------------|
| H1A | 0.8667     | 1.0324     | 0.6437     | 0.049        |
| H2A | 0.9940     | 1.1542     | 0.7157     | 0.055        |

|      |         |        |        |       |
|------|---------|--------|--------|-------|
| H4A  | 0.3996  | 1.2578 | 0.6080 | 0.054 |
| H5A  | 0.2757  | 1.1365 | 0.5346 | 0.05  |
| H7A  | 0.3301  | 0.9785 | 0.5694 | 0.039 |
| H8A  | 0.3383  | 0.9524 | 0.3919 | 0.065 |
| H8B  | 0.5055  | 1.0273 | 0.3871 | 0.065 |
| H8C  | 0.2513  | 1.0405 | 0.4150 | 0.065 |
| H10A | 0.8470  | 0.9592 | 0.4463 | 0.044 |
| H11A | 1.0980  | 0.8546 | 0.4685 | 0.044 |
| H13A | 1.2241  | 0.7267 | 0.5559 | 0.044 |
| H14A | 1.1688  | 0.6296 | 0.6734 | 0.047 |
| H15A | 0.8529  | 0.6354 | 0.7661 | 0.047 |
| H16A | 0.5963  | 0.7393 | 0.7425 | 0.041 |
| H18A | 0.4732  | 0.8672 | 0.6557 | 0.037 |
| H19A | 0.1313  | 0.7860 | 0.8759 | 0.043 |
| H20A | 0.0203  | 0.9033 | 0.7882 | 0.046 |
| H22A | 0.6353  | 1.0014 | 0.8765 | 0.047 |
| H23A | 0.7448  | 0.8841 | 0.9645 | 0.046 |
| H25A | 0.6712  | 0.7287 | 0.9557 | 0.041 |
| H26A | 0.6589  | 0.7132 | 1.1321 | 0.068 |
| H26B | 0.4810  | 0.7855 | 1.1305 | 0.068 |
| H26C | 0.7351  | 0.8015 | 1.1040 | 0.068 |
| H28A | 0.1555  | 0.7131 | 1.0800 | 0.043 |
| H29A | -0.1017 | 0.6098 | 1.0577 | 0.042 |
| H31A | -0.2460 | 0.4868 | 0.9625 | 0.042 |
| H32A | -0.2086 | 0.3948 | 0.8366 | 0.048 |
| H33A | 0.1075  | 0.3990 | 0.7434 | 0.046 |

|      |        |        |        |       |
|------|--------|--------|--------|-------|
| H34A | 0.3824 | 0.4963 | 0.7761 | 0.041 |
| H36A | 0.5170 | 0.6208 | 0.8668 | 0.036 |

---
